# Supplementary material for: Identification of Novel Lung Cancer Driver Genes Connecting Different Omics Levels With a Heat Diffusion Algorithm
Source: Front Cell Dev Biol. 2022 Jan 26;10:825272. doi: 10.3389/fcell.2022.825272 (PMC8826452; doi:10.3389/fcell.2022.825272)
Supplement: Supplementary file 1 [file Table2.XLSX]

## Sheet: Sheet1
Ensembl ID	Gene symbol	Heat	P-value	MAS	MFS
ENSP00000000233	ARF5	1.38e-05	0.844	456	0.69774
ENSP00000000412	M6PR	2.65e-05	0.564	656	0.353007
ENSP00000000442	ESRRA	3.28e-05	0.966	296	0.904712
ENSP00000001008	FKBP4	1.74e-05	0.842	364	0.692211
ENSP00000001146	CYP26B1	1.82e-05	0.99	194	0.321631
ENSP00000002125	NDUFAF7	2.45e-05	0.882	312	0.293291
ENSP00000002165	FUCA2	4.73e-05	0.69	254	0.167006
ENSP00000002596	HS3ST1	5.67e-05	0.396	504	0.290405
ENSP00000002829	SEMA3F	6.54e-05	0.218	877	0.836039
ENSP00000003084	CFTR	1.28e-05	0.568	865	0.706478
ENSP00000003100	CYP51A1	2.07e-05	0.992	272	0.435218
ENSP00000003302	USP28	3.05e-05	0.942	507	0.288024
ENSP00000004921	CCL18	2.56e-05	0.436	323	0
ENSP00000005178	PDK4	2.11e-05	0.604	272	0.49403
ENSP00000005180	CCL26	2.51e-05	0.582	0	0.567762
ENSP00000005226	USH1C	7.78e-05	0.02	985	0.785625
ENSP00000005257	RALA	1.14e-05	0.634	920	0.941606
ENSP00000005260	BAIAP2L1	3.47e-05	0.94	915	0.231275
ENSP00000005284	CACNG3	3.17e-05	0.23	720	0.349587
ENSP00000005286	TMEM132A	5.42e-05	0.758	150	0.466986
ENSP00000005340	DVL2	2.16e-05	0.532	820	0.910113
ENSP00000005386	RPAP3	2.63e-05	0.966	399	0.208855
ENSP00000005558	IFRD1	1.03e-05	0.994	0	0.553901
ENSP00000005587	SKAP2	6.59e-05	0.218	526	0.218261
ENSP00000005905	-	4.37e-05	0.894	169	0
ENSP00000005995	PRSS21	2.14e-05	0.986	197	0.254706
ENSP00000006015	HOXA11	3.32e-05	0.55	826	0.965864
ENSP00000006053	CX3CL1	1.82e-05	0.274	916	0.75383
ENSP00000006101	COPZ2	1.49e-05	0.974	177	0
ENSP00000006526	WDR54	7.98e-05	0.784	216	0.495154
ENSP00000006724	CEACAM7	9.41e-05	0.114	181	0.279499
ENSP00000007390	TSR3	7.04e-05	0.398	568	0.183724
ENSP00000007414	OSBPL7	1.47e-05	0.976	188	0.200691
ENSP00000007699	YBX2	1.24e-05	0.986	158	0.6318
ENSP00000007722	ITGA3	6.58e-05	0.122	946	0.750802
ENSP00000007735	KRT33A	9.78e-05	0.134	349	0.264583
ENSP00000007969	LRRC23	2.98e-05	0.308	208	0.822136
ENSP00000008391	TFAP2D	0.00010605	0.584	564	0.545699
ENSP00000008527	CRY1	2.01e-05	0.948	243	0.819781
ENSP00000008938	PGLYRP1	4.27e-05	0.226	414	0.467309
ENSP00000009041	STARD3NL	0.000163802	0.972	191	0.265405
ENSP00000009105	CAMK1G	1.96e-05	0.26	221	0.98443
ENSP00000009180	CD9	1.65e-05	0.46	414	0.82373
ENSP00000009530	CD74	2.3e-05	0.564	360	0.725092
ENSP00000010132	DYRK4	1.59e-05	0.408	418	0.988803
ENSP00000010299	FAM76A	6.07e-05	0.99	0	0.396167
ENSP00000010404	MGST1	3.9e-05	0.398	223	0.56315
ENSP00000011292	CPA1	1.61e-05	0.692	175	0.227688
ENSP00000011473	SYPL1	6.36e-05	0.996	0	0.336578
ENSP00000011619	RANBP9	3.21e-05	0.378	403	0.441339
ENSP00000011684	PLEKHG6	1.52e-05	0.986	0	0.267135
ENSP00000011691	SS18L2	2.41e-05	0.994	0	0.429229
ENSP00000011898	TSPAN9	4.52e-05	0.978	218	0.249586
ENSP00000012049	QPCTL	4.19e-05	0.716	284	0.223696
ENSP00000012134	HIVEP2	2.03e-05	0.442	287	0.969909
ENSP00000012443	PPP5C	1.32e-05	0.362	414	0.970796
ENSP00000013070	UBR7	5.89e-05	0.8	158	0.306339
ENSP00000013125	MAP4K5	1.94e-05	0.784	261	0.985236
ENSP00000013222	INMT	3.92e-05	0.326	167	0.344049
ENSP00000013807	ERCC1	1.96e-05	0.728	912	0.726497
ENSP00000014914	GPRC5A	8.6e-05	0.442	179	0.292603
ENSP00000014930	HEBP1	3.55e-05	0.776	900	0.813485
ENSP00000014935	DNASE1L1	7.57e-05	0.3	159	0.272639
ENSP00000016171	COX15	1.23e-05	0.972	228	0.254185
ENSP00000016946	RGPD5	1.25e-05	0.87	241	0.972248
ENSP00000017003	XYLT2	1.33e-05	0.792	172	0.204817
ENSP00000019103	SCTR	2.87e-05	0.226	906	0.723293
ENSP00000019317	RALBP1	1.88e-05	0.886	823	0.553361
ENSP00000020926	SYT13	6.97e-05	0.132	887	0.231427
ENSP00000020945	SNAI2	1.95e-05	0.26	995	0.984968
ENSP00000023064	SLC7A9	2.19e-05	0.788	468	0.27037
ENSP00000023897	GABRA1	3.79e-05	0.13	292	0.566945
ENSP00000023939	RTFDC1	8.68e-05	0.73	692	0.395103
ENSP00000024061	SLC45A4	6.3e-05	0.408	580	0.240784
ENSP00000025008	RB1CC1	2.62e-05	0.562	970	0.640347
ENSP00000025301	AKAP11	9.15e-05	0.612	414	0.256657
ENSP00000026218	PIGQ	1.98e-05	0.94	176	0.18551
ENSP00000027335	CDH17	2.97e-05	0.066	920	0.926708
ENSP00000029410	B4GALT7	2.53e-05	0.502	916	0.278689
ENSP00000033079	FAM13B	2.83e-05	0.986	171	0.42382
ENSP00000035307	CHPF2	2.9e-05	0.38	900	0.200242
ENSP00000037243	GABARAPL2	2.1e-05	0.836	864	0.422745
ENSP00000037502	MYOC	2.41e-05	0.516	390	0.690122
ENSP00000037869	FAM136A	2.51e-05	0.986	0	0.352785
ENSP00000039989	TTC17	2.72e-05	0.984	0	0.477419
ENSP00000040584	HOXC8	3.52e-05	0.376	797	0.965199
ENSP00000040663	MRI1	2.51e-05	0.976	181	0.353221
ENSP00000040738	BOD1L1	8e-05	0.494	191	0.333438
ENSP00000040877	TARBP1	2.51e-05	0.766	211	0.6037
ENSP00000042931	BEST2	2.33e-05	0.58	153	0.271635
ENSP00000043402	RTN4R	2.92e-05	0.152	469	0.771843
ENSP00000045083	FAM65C	4.76e-05	0.438	252	0.303858
ENSP00000046087	ZPBP	4.04e-05	0.256	325	0.549835
ENSP00000046794	LCP2	2.43e-05	0.764	539	0.754722
ENSP00000052754	DCN	1.98e-05	0.13	996	0.918057
ENSP00000053243	TNFRSF17	2.98e-05	0.414	227	0.714722
ENSP00000053469	GUCA1A	3.28e-05	0.068	398	0.590166
ENSP00000053867	GRN	2.42e-05	0.454	254	0.712532
ENSP00000054650	THAP3	3.75e-05	1	0	0.337078
ENSP00000054666	VAMP3	1.68e-05	0.736	241	0.330552
ENSP00000054668	UTS2	2.45e-05	0.49	900	0.691819
ENSP00000054950	RCN1	1.9e-05	0.69	301	0.646418
ENSP00000055077	RFC2	1.26e-05	0.798	278	0.646825
ENSP00000055335	PPP1R3F	4.15e-05	0.34	509	0.254716
ENSP00000056217	ARHGEF5	3.93e-05	0.21	377	0.714
ENSP00000056233	NFE2L3	2.49e-05	0.924	782	0.83923
ENSP00000057513	TNIP3	4.15e-05	0.844	360	0.342223
ENSP00000058691	HEBP2	3.75e-05	0.994	0	0
ENSP00000061240	TLL1	2.88e-05	0.838	151	0.55856
ENSP00000062104	NNAT	3.69e-05	0.834	381	0.290743
ENSP00000064571	CBLN4	7.46e-05	0.14	226	0.299136
ENSP00000064724	CLDN11	1.84e-05	0.552	515	0.478823
ENSP00000064780	RELT	3.86e-05	0.334	181	0.290288
ENSP00000070846	PKP2	6.19e-05	0.11	567	0.758901
ENSP00000071281	FHL1	6e-05	0.454	213	0.595064
ENSP00000072644	YIPF1	3.21e-05	0.856	217	0.727949
ENSP00000072869	ADCK2	2.24e-05	0.972	216	0.191538
ENSP00000074304	INPP4A	2.95e-05	0.896	229	0.180533
ENSP00000075120	SLC2A3	1.69e-05	0.966	692	0.51655
ENSP00000075503	STYK1	1.43e-05	0.614	581	0.991315
ENSP00000078429	GNA11	1.37e-05	0.754	986	0.808487
ENSP00000078445	CREB3L3	2.19e-05	0.474	313	0.583511
ENSP00000078527	PIGV	2.07e-05	0.922	483	0.138113
ENSP00000080059	HDAC7	1.26e-05	0.514	615	0
ENSP00000081029	MRPS35	2.32e-05	0.972	150	0.422726
ENSP00000083182	APPBP2	2.01e-05	0.156	487	0.673756
ENSP00000084798	CA11	1.38e-05	0.774	372	0.274695
ENSP00000085068	ISOC2	4.88e-05	0.832	233	0.343494
ENSP00000085219	CD22	1.76e-05	0.904	408	0.713211
ENSP00000086933	GSC2	3.79e-05	0.304	182	0.854933
ENSP00000155093	ZFY	2.35e-05	0.316	286	0.980125
ENSP00000155840	KCNQ1	2.97e-05	0.144	784	0.777739
ENSP00000155858	TRPM5	0.00011167	0.014	761	0.429794
ENSP00000155926	TRIB2	1.41e-05	0.504	437	0.981867
ENSP00000156109	GPKOW	3.57e-05	0.246	232	0.219808
ENSP00000156471	AQR	2.76e-05	0.738	276	0.536285
ENSP00000156499	KLK14	5.03e-05	0.252	215	0.226126
ENSP00000156626	ST6GALNAC1	2.09e-05	0.878	284	0.435947
ENSP00000156825	MBD3	5.48e-05	0.992	360	0.854794
ENSP00000157600	LMCD1	2.28e-05	0.622	393	0.305741
ENSP00000157812	PSMC4	1.43e-05	0.93	453	0.565948
ENSP00000158009	FNDC8	0.000240254	0.048	195	0.582186
ENSP00000158166	CAMKK1	3.46e-05	0.142	422	0.765425
ENSP00000158762	ACAP1	2.28e-05	0.8	176	0.321077
ENSP00000158771	DERL2	1.47e-05	0.956	390	0.526382
ENSP00000159060	NOX3	2.46e-05	0.508	534	0.70896
ENSP00000159087	ANO8	4.72e-05	0.466	369	0.150445
ENSP00000159111	KDM4B	5.18e-05	0.42	934	0.885315
ENSP00000160262	ICAM3	1.92e-05	0.538	457	0.729258
ENSP00000160373	CTTNBP2	3.73e-05	0.082	290	0.843854
ENSP00000160382	ACTL6B	1.74e-05	0.176	515	0.979215
ENSP00000160740	CIC	2.06e-05	0.702	341	0.647474
ENSP00000160827	KIF22	2.99e-05	0.162	622	0.851361
ENSP00000161006	PRSS22	1.79e-05	0.624	158	0.23984
ENSP00000161559	CEACAM1	3.33e-05	0.2	669	0.671071
ENSP00000162023	MEF2BNB-MEF2B	2.12e-05	0.222	707	0
ENSP00000162044	TMEM161A	0.000187946	0.384	240	0.501695
ENSP00000162391	FOXJ2	1.68e-05	0.908	252	0
ENSP00000162749	TNFRSF1A	1.07e-05	0.988	552	0.870618
ENSP00000163416	GOLGA5	1.08e-05	0.74	197	0.128532
ENSP00000164024	CELSR3	6.94e-05	0.034	290	0.669813
ENSP00000164133	PPP2R5B	3.44e-05	0.178	811	0.655893
ENSP00000164139	PYGM	2.3e-05	0.318	757	0.345741
ENSP00000164227	BCL3	1.8e-05	0.426	858	0.951866
ENSP00000164305	PIGB	3.45e-05	0.846	183	0.155888
ENSP00000164640	PDZD4	4.93e-05	0.464	191	0.234458
ENSP00000166139	FSTL3	2.5e-05	0.856	195	0.782239
ENSP00000166244	EPHA8	1.59e-05	0.394	436	0.996386
ENSP00000166534	P4HA2	3.28e-05	0.752	224	0.188979
ENSP00000167106	VASH1	0.000113501	0.082	487	0.209107
ENSP00000167586	KRT14	1.8e-05	0.834	709	0.894426
ENSP00000167588	KRT20	0.000163108	0.028	410	0.322411
ENSP00000168148	SPP2	1.99e-05	0.402	0	0.288421
ENSP00000168712	FGF4	1.39e-05	0.97	930	0.983643
ENSP00000168977	NMRK2	2.74e-05	0.44	485	0.292953
ENSP00000169298	ST6GAL1	3.17e-05	0.49	903	0.393667
ENSP00000169551	TIMM21	2.29e-05	0.994	0	0.178247
ENSP00000170447	MKRN2	1.75e-05	0.992	0	0.301165
ENSP00000170564	GPATCH1	7.13e-05	0.534	270	0.253438
ENSP00000170630	IL4R	2.57e-05	0.536	325	0.791755
ENSP00000171214	RDH8	1.94e-05	0.99	215	0
ENSP00000171757	P2RY10	2.02e-05	0.584	900	0.684928
ENSP00000171887	TNS1	1.59e-05	0.298	684	0.85938
ENSP00000172229	NGFR	3.24e-05	0.13	947	0.904346
ENSP00000173229	NTN1	4.83e-05	0.17	860	0.913995
ENSP00000173527	ISOC1	5.95e-05	0.992	532	0.332347
ENSP00000173898	TRO	2.4e-05	0.85	295	0.701166
ENSP00000174618	MNT	2.12e-05	0.714	347	0.725363
ENSP00000174653	AP3M2	2.83e-05	0.778	199	0.179541
ENSP00000175091	LAPTM4A	2.93e-05	0.996	354	0.21227
ENSP00000175238	ADAM7	0.000102129	0.008	295	0.277953
ENSP00000175756	PTPN18	3.25e-05	0.186	663	0.677273
ENSP00000176183	DRD4	3.25e-05	0.176	913	0.862943
ENSP00000176195	SCT	3.72e-05	0.936	900	0.481838
ENSP00000176763	STK10	8.03e-05	0.838	216	0.33176
ENSP00000177648	ALPK1	8.82e-05	0.132	266	0.314586
ENSP00000177694	TBX21	1.52e-05	0.762	897	0.933883
ENSP00000178638	CA12	2.58e-05	0.896	262	0.26586
ENSP00000178640	MAP2K5	1.93e-05	0.124	630	0.986475
ENSP00000179259	C12orf5	1.82e-05	0.95	990	0
ENSP00000180166	FGF20	3.55e-05	0.076	902	0.953759
ENSP00000180173	MTMR7	2.9e-05	0.378	522	0.247803
ENSP00000181383	CPB2	2.64e-05	0.724	245	0.413742
ENSP00000181796	FAM107B	0.000220187	1	0	0.498725
ENSP00000181839	CDK13	1.63e-05	0.658	274	0.883062
ENSP00000182290	TSPAN32	5.74e-05	0.342	256	0.29646
ENSP00000182377	FAR2	2.05e-05	0.99	0	0.196655
ENSP00000182527	TRAM2	9.83e-05	0.646	626	0.255347
ENSP00000183605	CLDN18	2.48e-05	0.49	151	0.261956
ENSP00000184183	ROPN1	1.8e-05	0.524	0	0.407777
ENSP00000184266	NDUFB4	2.09e-05	0.978	235	0.200429
ENSP00000184956	HEATR6	4.8e-05	0.93	407	0.775051
ENSP00000185150	ERLEC1	1.98e-05	0.95	206	0.200914
ENSP00000185206	CLIC5	1.75e-05	0.606	284	0.22681
ENSP00000186436	TMEM131	1.8e-05	0.976	234	0.13362
ENSP00000187397	ARPP21	3.28e-05	0.336	307	0.553997
ENSP00000187762	TMEM38A	9.73e-05	0.078	264	0.228201
ENSP00000188312	ACTR6	1.41e-05	0.54	244	0.646925
ENSP00000188790	FAP	2.68e-05	0.79	191	0.147838
ENSP00000190165	DMRT3	1.46e-05	0.704	290	0.635871
ENSP00000190983	WISP2	4.95e-05	0.412	161	0.415983
ENSP00000192314	GAL3ST2	1.13e-05	0.59	0	0.320741
ENSP00000192788	UHRF1BP1	6.23e-05	0.874	311	0.461074
ENSP00000193322	OSTM1	4.69e-05	0.988	359	0.185569
ENSP00000193391	IMPG2	7.02e-05	0.116	391	0.575599
ENSP00000194118	KIAA0141	1.66e-05	0.602	505	0.630926
ENSP00000194130	SLC13A1	1.43e-05	0.92	196	0.299619
ENSP00000194155	PCDHB2	7.96e-05	0.96	0	0.833759
ENSP00000194214	HSPB11	3.04e-05	0.872	165	0.263711
ENSP00000194530	STRADB	3.17e-05	0.994	999	0.322981
ENSP00000195455	C4orf6	1.58e-05	0.56	0	0
ENSP00000195654	DOPEY1	1.79e-05	0.944	242	0.239132
ENSP00000196061	PLOD1	4.12e-05	0.282	900	0.545891
ENSP00000196482	ZNF324	2.19e-05	0.612	286	0.992082
ENSP00000196489	ZNF416	2.24e-05	0.664	286	0.9936
ENSP00000196548	ZNF8	1.98e-05	0.734	286	0
ENSP00000197268	KIAA1467	7.37e-05	0.992	0	0
ENSP00000198765	CPNE3	2.22e-05	0.988	443	0.265901
ENSP00000198767	RRN3	4.06e-05	0.944	295	0.782097
ENSP00000199280	AQP2	1.73e-05	0.55	560	0.377999
ENSP00000199389	EIF2AK1	2.7e-05	0.514	300	0.594123
ENSP00000199447	NME8	1.1e-05	0.772	752	0.719927
ENSP00000199706	MRPL28	2.94e-05	0.878	291	0.317933
ENSP00000199708	HBQ1	2.46e-05	0.894	191	0.16523
ENSP00000199764	CEACAM6	3.78e-05	0.168	396	0.609025
ENSP00000199814	RBM22	2.04e-05	0.692	243	0.306563
ENSP00000199936	HSD17B2	1.61e-05	0.76	289	0.395466
ENSP00000200135	ZW10	2.6e-05	0.632	951	0.695085
ENSP00000200181	ITGB4	6.67e-05	0.278	946	0.856955
ENSP00000200457	TRIP6	2.72e-05	0.926	574	0.639937
ENSP00000200557	ADAM11	4.12e-05	0.334	193	0.226138
ENSP00000200652	SLC22A4	1.29e-05	0.954	376	0.60114
ENSP00000200676	CETP	3.11e-05	0.338	975	0.623332
ENSP00000201031	TFAP2C	4.37e-05	0.824	935	0.88978
ENSP00000201586	SULT2B1	1.81e-05	0.156	398	0.875131
ENSP00000201647	EPS8L1	8.68e-05	0.19	262	0.33843
ENSP00000201979	REM1	1.32e-05	0.182	574	0.954452
ENSP00000202017	PDRG1	3.03e-05	0.992	398	0.281934
ENSP00000202556	PPP1R13B	1.85e-05	0.988	995	0.702697
ENSP00000202625	TGM6	2.41e-05	0.568	189	0.391334
ENSP00000202773	RPL6	1.08e-05	0.976	341	0.701275
ENSP00000202788	-	4.4e-05	0.998	993	0
ENSP00000202831	SLC24A6	7.36e-05	0.236	614	0
ENSP00000202967	SIRT4	2.75e-05	0.916	407	0.877411
ENSP00000203556	GMIP	1.86e-05	0.994	0	0.351221
ENSP00000203629	LAG3	1.31e-05	0.79	205	0.494449
ENSP00000203630	MLF2	3.08e-05	0.782	269	0.233186
ENSP00000203664	OTUB2	4.89e-05	0.684	255	0.175948
ENSP00000204517	TFAP4	2.87e-05	0.994	365	0.813832
ENSP00000204549	PDCD7	5.61e-05	0.99	0	0.286268
ENSP00000204566	SPG21	2.95e-05	0.62	228	0.436647
ENSP00000204604	CHRD	1.49e-05	0.662	733	0.957929
ENSP00000204615	THPO	1.8e-05	0.55	396	0.87764
ENSP00000204679	GNPTG	7.3e-05	0.182	481	0.16537
ENSP00000204726	GOLGA3	7.57e-05	0.994	225	0.195109
ENSP00000204961	EFNB1	4.2e-05	0.128	969	0.898341
ENSP00000205061	GLG1	1.45e-05	0.994	0	0.358656
ENSP00000205143	DLL3	2.95e-05	0.318	417	0.835197
ENSP00000205194	NAT14	6.23e-05	0.988	0	0.373198
ENSP00000205214	AASDH	2.7e-05	0.558	237	0.494059
ENSP00000205386	LAMB4	0.000220259	0	488	0.409228
ENSP00000205557	ABCC6	1.3e-05	0.982	341	0.449394
ENSP00000205636	CMTM6	5.9e-05	0.988	150	0.425947
ENSP00000205890	MYO15A	3.85e-05	0.128	741	0.73721
ENSP00000205948	APOH	5.83e-05	0.16	815	0.624057
ENSP00000206020	SPAG7	3.57e-05	0.99	0	0.195202
ENSP00000206249	ESR1	1.01e-05	0.554	997	0
ENSP00000206262	RGS17	4.33e-05	0.514	188	0.502097
ENSP00000206380	TMEM101	3.58e-05	0.988	159	0.304841
ENSP00000206474	HAUS4	5.66e-05	0.986	0	0.345506
ENSP00000206513	CEBPE	1.54e-05	0.668	159	0.804891
ENSP00000206544	SLC22A17	0.000120452	0.442	472	0.279416
ENSP00000206595	G2E3	2.26e-05	0.93	241	0.389406
ENSP00000206765	TGM1	3.66e-05	0.288	726	0.689351
ENSP00000207157	TBX15	4.1e-05	0.164	453	0.902937
ENSP00000207437	MYL6B	3.18e-05	0.278	854	0
ENSP00000207457	TEKT2	7.13e-05	0.062	462	0.561474
ENSP00000207549	UNC13D	2.51e-05	0.86	159	0.184865
ENSP00000207870	XYLB	2.96e-05	0.75	573	0.14538
ENSP00000209718	KRT23	3.03e-05	0.476	216	0.42224
ENSP00000209728	CDC6	1.12e-05	0.858	532	0.877162
ENSP00000209873	AAAS	3.38e-05	0.836	190	0.388177
ENSP00000209875	CBX5	2.64e-05	0.608	584	0.915569
ENSP00000209884	KLHL20	2.77e-05	0.87	911	0.832593
ENSP00000209929	FMO2	2.37e-05	0.54	223	0.165875
ENSP00000210060	DHPS	2.26e-05	0.45	266	0.445969
ENSP00000210187	RAB26	1.43e-05	0.988	0	0.25696
ENSP00000210313	PSMD5	1.38e-05	0.994	531	0.578239
ENSP00000210444	NANS	2.5e-05	0.794	532	0.13465
ENSP00000210633	SEMA4G	6.77e-05	0.214	363	0.7067
ENSP00000211076	TPSD1	5.7e-05	0.18	169	0.212775
ENSP00000211122	GSTA3	1.15e-05	0.804	418	0.239106
ENSP00000211287	MAPK13	1.56e-05	0.18	815	0.982197
ENSP00000211314	TMEM14A	5e-05	0.988	0	0.454812
ENSP00000211413	PRRT1	4.75e-05	0.372	242	0.361737
ENSP00000211936	ZNF184	2.3e-05	0.386	286	0.989227
ENSP00000211998	VCL	2.44e-05	0.176	759	0.915224
ENSP00000212015	SIRT1	1.21e-05	0.79	999	0.910586
ENSP00000212355	TGFBR3	2.11e-05	0.976	188	0.685634
ENSP00000214869	TMED1	5.18e-05	0.76	189	0.204823
ENSP00000215057	MZF1	2.11e-05	0.322	388	0.969259
ENSP00000215061	OCEL1	1.8e-05	0.65	191	0.338475
ENSP00000215095	STX1B	1.72e-05	0.748	288	0.381469
ENSP00000215368	EFNA2	5.25e-05	0.064	997	0.844162
ENSP00000215376	C19orf26	2.33e-05	0.558	278	0
ENSP00000215479	AMELY	7.77e-05	0.068	608	0.27998
ENSP00000215530	FGF22	2.21e-05	0.514	886	0.915102
ENSP00000215531	C19orf77	0.000236687	0.998	0	0
ENSP00000215555	2021-03-02	1.72e-05	0.996	205	0.336067
ENSP00000215567	TECR	1.25e-05	0.938	297	0.413298
ENSP00000215570	TIMM13	1.1e-05	0.994	194	0.559348
ENSP00000215582	C19orf21	7.49e-05	0.806	179	0
ENSP00000215591	POLRMT	2.5e-05	0.8	249	0
ENSP00000215631	GADD45B	2.25e-05	0.87	720	0.889456
ENSP00000215637	MADCAM1	2.54e-05	0.346	207	0.766891
ENSP00000215659	MAPK12	1.59e-05	0.186	844	0.981744
ENSP00000215727	SERPIND1	3.55e-05	0.232	216	0.39923
ENSP00000215730	SNAP29	1.76e-05	0.968	198	0.194965
ENSP00000215739	LZTR1	3.71e-05	0.82	161	0.516966
ENSP00000215742	THAP7	2.19e-05	0.92	0	0.335391
ENSP00000215743	MMP11	6.15e-05	0.046	516	0.865579
ENSP00000215754	MIF	2.81e-05	0.446	774	0.837485
ENSP00000215770	DDTL	0.000129851	0.438	179	0.200266
ENSP00000215773	DDT	2.32e-05	0.856	416	0.86363
ENSP00000215780	GSTT2	1.47e-05	0.836	391	0
ENSP00000215781	OSM	1.36e-05	0.808	261	0.780192
ENSP00000215793	SF3A1	1.61e-05	0.86	331	0.421027
ENSP00000215794	USP18	2.22e-05	0.736	820	0.293807
ENSP00000215812	SEC14L3	1.8e-05	0.944	386	0.169431
ENSP00000215829	SNRPD3	1.92e-05	0.938	325	0.509505
ENSP00000215832	MAPK1	1.17e-05	0.376	998	0
ENSP00000215838	TCN2	3.49e-05	0.298	505	0.261473
ENSP00000215855	CRYBB3	6.11e-05	0.246	451	0.283598
ENSP00000215862	MORC2	2.91e-05	0.93	224	0.26625
ENSP00000215882	SLC25A1	1.29e-05	0.818	191	0.213957
ENSP00000215885	PLA2G3	1.46e-05	0.726	390	0.119778
ENSP00000215886	LGALS2	7.92e-05	0.148	574	0.281676
ENSP00000215904	PDXP	1.62e-05	0.634	343	0.656949
ENSP00000215909	LGALS1	4.05e-05	0.13	842	0.835336
ENSP00000215912	PIK3IP1	3.83e-05	0.356	456	0.265935
ENSP00000215917	SRRD	5.66e-05	0.268	216	0.24053
ENSP00000215941	ANKRD54	3.23e-05	0.196	561	0.948737
ENSP00000215957	MICALL1	3.3e-05	0.61	244	0.400545
ENSP00000215980	CENPM	1.97e-05	0.95	900	0.572653
ENSP00000216029	CBY1	7.75e-05	0.148	213	0.42973
ENSP00000216034	TOMM22	1.11e-05	0.988	0	0.263278
ENSP00000216036	RTDR1	2.56e-05	0.842	597	0
ENSP00000216037	XBP1	2.75e-05	0.818	472	0.889065
ENSP00000216038	C22orf28	1.11e-05	0.994	0	0
ENSP00000216039	JOSD1	2.86e-05	0.994	216	0.26401
ENSP00000216044	GTPBP1	4.2e-05	0.422	275	0.179233
ENSP00000216068	DNAL4	6.2e-05	0.062	889	0.662017
ENSP00000216071	C22orf31	1.33e-05	0.886	0	0.466718
ENSP00000216075	MIOX	3.9e-05	0.368	815	0.173197
ENSP00000216085	RHBDD3	3.13e-05	0.874	234	0.332383
ENSP00000216099	APOBEC3D	4.89e-05	0.934	325	0.207204
ENSP00000216101	RASL10A	1.58e-05	0.26	604	0.939191
ENSP00000216115	BIK	3.06e-05	0.982	873	0.372071
ENSP00000216117	HMOX1	1.8e-05	0.598	913	0.880727
ENSP00000216121	NIPSNAP1	1.18e-05	0.994	0	0.21107
ENSP00000216122	MCM5	1.1e-05	0.764	656	0
ENSP00000216124	ARSA	3.08e-05	0.32	372	0.142209
ENSP00000216127	RASD2	1.5e-05	0.22	601	0.945376
ENSP00000216129	TTLL12	2.9e-05	0.968	179	0.335309
ENSP00000216133	CBX7	1.07e-05	0.762	298	0.769774
ENSP00000216139	ACR	1.63e-05	0.492	505	0.313002
ENSP00000216144	CABP7	1.85e-05	0.288	575	0
ENSP00000216160	TAB1	1.78e-05	0.88	783	0.859757
ENSP00000216177	PNPLA5	5.89e-05	0.168	177	0.163376
ENSP00000216180	PNPLA3	2.73e-05	0.33	376	0.325465
ENSP00000216181	MYH9	2.39e-05	0.158	731	0.868235
ENSP00000216185	TXN2	1.28e-05	0.802	304	0.594794
ENSP00000216187	FOXRED2	1.64e-05	0.992	0	0.178707
ENSP00000216194	ADSL	2.74e-05	0.404	561	0.57263
ENSP00000216200	PVALB	1.87e-05	0.152	654	0.97618
ENSP00000216211	UPK3A	1.13e-05	0.654	0	0.343951
ENSP00000216214	FAM118A	4.18e-05	0.986	0	0.251023
ENSP00000216218	ST13	5.54e-05	0.942	237	0.16012
ENSP00000216225	RBX1	1.07e-05	0.992	999	0.715871
ENSP00000216237	L3MBTL2	4.08e-05	0.536	156	0.78628
ENSP00000216241	CHADL	2.92e-05	0.42	448	0.961059
ENSP00000216252	PHF5A	1.52e-05	0.76	359	0.509002
ENSP00000216254	ACO2	1.13e-05	0.916	300	0.625816
ENSP00000216259	PMM1	1.5e-05	0.912	186	0.394592
ENSP00000216264	CERK	2.27e-05	0.946	211	0.29659
ENSP00000216267	BRD1	1.61e-05	0.456	630	0
ENSP00000216268	ZBED4	1.01e-05	0.838	0	0.435352
ENSP00000216271	HDAC10	1.52e-05	0.43	502	0
ENSP00000216274	RIPK3	1.54e-05	0.57	436	0.990314
ENSP00000216277	PAPOLA	1.37e-05	0.992	165	0.578099
ENSP00000216286	NID2	8.19e-05	0.056	309	0.670617
ENSP00000216294	SNAPC1	2.5e-05	0.982	801	0.53802
ENSP00000216297	SUPT16H	1.93e-05	0.896	311	0.92973
ENSP00000216330	FKBP3	1.54e-05	0.648	604	0.69295
ENSP00000216336	CTSG	1.45e-05	0.496	394	0.78405
ENSP00000216361	COCH	4.33e-05	0.3	353	0.479764
ENSP00000216366	AP4S1	1.14e-05	0.986	0	0.184613
ENSP00000216367	POLE2	1.5e-05	0.968	153	0.547803
ENSP00000216373	SOS2	2.7e-05	0.22	996	0.787458
ENSP00000216392	PYGL	1.31e-05	0.966	394	0.415036
ENSP00000216410	GNPNAT1	1.84e-05	0.764	201	0.147723
ENSP00000216416	CNIH	3.31e-05	0.23	191	0
ENSP00000216420	CGRRF1	8.68e-05	0.978	396	0.433307
ENSP00000216442	ATP6V1D	1.7e-05	0.956	167	0.153653
ENSP00000216445	C14orf105	1.14e-05	0.846	0	0.44968
ENSP00000216446	PLEK2	0.000143808	0.662	159	0.331439
ENSP00000216452	PIGH	2.63e-05	0.982	0	0.183729
ENSP00000216455	PSMA3	1.13e-05	0.94	288	0.47597
ENSP00000216465	GSTZ1	1.28e-05	0.92	391	0.591293
ENSP00000216471	SAMD15	2.73e-05	0.37	0	0.653439
ENSP00000216479	AHSA1	1.81e-05	0.886	286	0.28682
ENSP00000216487	RIN3	5.73e-05	0.158	190	0.272713
ENSP00000216489	ALKBH1	1.44e-05	0.998	0	0.154914
ENSP00000216492	CHGA	2.61e-05	0.51	563	0.799403
ENSP00000216500	DHRS7	1.81e-05	0.95	187	0.163082
ENSP00000216513	SIX4	5.11e-05	0.244	271	0.940778
ENSP00000216540	SLC10A1	2.25e-05	0.494	296	0.371393
ENSP00000216554	EIF5	1.05e-05	0.99	195	0.6899
ENSP00000216602	ZFYVE21	0.000153966	0.526	160	0.286052
ENSP00000216629	BDKRB1	2.73e-05	0.318	915	0.834892
ENSP00000216639	VRK1	1.44e-05	0.684	997	0
ENSP00000216714	APEX1	1.31e-05	0.684	982	0.649934
ENSP00000216727	PABPN1	1.92e-05	0.946	270	0.631696
ENSP00000216733	EFS	5.83e-05	0.604	235	0.429591
ENSP00000216775	CPNE6	1.64e-05	0.632	426	0
ENSP00000216780	PCK2	1.38e-05	0.932	490	0.777097
ENSP00000216797	NFKBIA	1.44e-05	0.788	900	0.950698
ENSP00000216802	PSME2	1.54e-05	0.982	644	0.445786
ENSP00000216807	BRMS1L	2.13e-05	0.99	296	0.852999
ENSP00000216832	PNN	2.05e-05	0.99	167	0.565347
ENSP00000216840	RABGGTA	2.78e-05	0.93	270	0.189824
ENSP00000216862	CYP24A1	2.8e-05	0.472	628	0.55282
ENSP00000216911	AURKA	1.68e-05	0.506	999	0.762921
ENSP00000216923	ZFP64	2.4e-05	0.208	573	0.97185
ENSP00000216951	GSS	1.43e-05	0.962	539	0.433005
ENSP00000216962	PYGB	1.28e-05	0.968	359	0.368654
ENSP00000216968	PROCR	5.29e-05	0.656	207	0.313994
ENSP00000217026	MYBL2	1.7e-05	0.142	584	0
ENSP00000217043	R3HDML	3.89e-05	0.442	250	0.321273
ENSP00000217086	SALL4	2.31e-05	0.99	315	0.972322
ENSP00000217109	CSTF1	3.32e-05	0.598	647	0.527853
ENSP00000217121	TPD52L2	6.7e-05	0.506	158	0.213861
ENSP00000217130	ZNF512B	1.52e-05	0.676	313	0.974452
ENSP00000217131	CTSZ	2.48e-05	0.724	235	0.215852
ENSP00000217133	TUBB1	1.88e-05	0.276	603	0.697947
ENSP00000217159	SLCO4A1	3.43e-05	0.782	173	0.238106
ENSP00000217169	BIRC7	2.45e-05	0.894	420	0.558589
ENSP00000217182	EEF1A2	1.18e-05	0.772	349	0.683309
ENSP00000217185	PTK6	1.31e-05	0.744	863	0.991996
ENSP00000217188	SRMS	1.31e-05	0.742	436	0.992442
ENSP00000217195	C20orf27	9.48e-05	0.732	151	0.388355
ENSP00000217233	TRIB3	1.16e-05	0.96	437	0.981642
ENSP00000217244	CSNK2A1	1.11e-05	0.85	997	0
ENSP00000217246	MACROD2	8.95e-05	0.184	748	0.167509
ENSP00000217254	SLC52A3	4.93e-05	0.282	213	0.227686
ENSP00000217260	RSPO4	1.28e-05	0.9	597	0.144008
ENSP00000217270	PROKR2	2.73e-05	0.44	904	0.721557
ENSP00000217289	FERMT1	6.21e-05	0.194	288	0.225292
ENSP00000217299	XKR7	4.07e-05	0.428	200	0
ENSP00000217305	PDYN	2.4e-05	0.332	914	0.841
ENSP00000217320	TLDC2	1.52e-05	0.76	0	0.509918
ENSP00000217381	SNTA1	5.65e-05	0.054	999	0.637353
ENSP00000217386	OXT	2.28e-05	0.166	927	0.775924
ENSP00000217402	CHMP4B	1.56e-05	0.722	206	0
ENSP00000217407	LBP	1.32e-05	0.746	755	0.673496
ENSP00000217420	SLC32A1	2.54e-05	0.556	323	0.471992
ENSP00000217423	CST4	3.3e-05	0.736	195	0.20859
ENSP00000217429	FAM83D	2.97e-05	0.922	325	0.589078
ENSP00000217446	PIGU	3.32e-05	0.758	288	0.148122
ENSP00000217455	ACOT8	1.41e-05	0.818	360	0.587941
ENSP00000217456	APMAP	3.31e-05	0.814	151	0.156728
ENSP00000217515	TXNL1	2.88e-05	0.712	329	0.354107
ENSP00000217652	MYL12A	3.07e-05	0.166	786	0.789976
ENSP00000217740	RNF125	3.26e-05	0.798	256	0.205568
ENSP00000217893	TAF9	1.83e-05	0.792	999	0.898864
ENSP00000217909	SLC25A43	2.77e-05	0.994	0	0.289934
ENSP00000217958	PSMD10	2.36e-05	0.348	773	0.800681
ENSP00000217961	STS	1.43e-05	0.372	359	0.693292
ENSP00000217964	TBL1X	1.66e-05	0.956	390	0.857106
ENSP00000217999	RHOXF1	3.49e-05	0.326	182	0.866607
ENSP00000218004	NXT2	3.15e-05	0.994	0	0.281346
ENSP00000218006	GUCY2F	1.91e-05	0.194	404	0.986338
ENSP00000218032	TLR8	1.88e-05	0.544	369	0.796884
ENSP00000218056	WDR13	4.57e-05	0.372	158	0.279669
ENSP00000218075	GLRA2	3.48e-05	0.166	425	0.545346
ENSP00000218089	STAG2	1.91e-05	0.776	900	0.558667
ENSP00000218099	F9	3.74e-05	0.118	742	0.622982
ENSP00000218104	ABCD1	2.26e-05	0.636	171	0.15181
ENSP00000218147	BCORL1	0.000179415	0.142	365	0.555774
ENSP00000218176	KCND1	3.64e-05	0.232	194	0.500547
ENSP00000218197	SLC25A14	1.07e-05	0.728	313	0.196853
ENSP00000218230	PCSK1N	1.05e-05	0.806	0	0.46902
ENSP00000218249	RAB40AL	1.75e-05	0.688	499	0.488329
ENSP00000218316	GPR50	3.67e-05	0.128	406	0.760082
ENSP00000218340	RP2	6.12e-05	0.578	371	0.308193
ENSP00000218343	PHF16	6.03e-05	0.77	274	0
ENSP00000218348	USP11	2.18e-05	0.874	902	0.406615
ENSP00000218364	HTATSF1	3.12e-05	0.552	165	0.46421
ENSP00000218388	TIMP1	1.73e-05	0.694	886	0.917679
ENSP00000218436	ITIH6	5.76e-05	0.088	276	0.514337
ENSP00000218439	MAGED2	3.7e-05	0.52	742	0.474001
ENSP00000218516	GLA	5.45e-05	0.294	175	0.203669
ENSP00000218548	ATP12A	1.72e-05	0.506	706	0.705717
ENSP00000218652	NDFIP2	1.53e-05	0.998	577	0.188685
ENSP00000218721	MLNR	2.17e-05	0.594	904	0.739889
ENSP00000218758	ACP5	1.44e-05	0.94	234	0.806036
ENSP00000218867	SGCG	1.87e-05	0.228	983	0.619931
ENSP00000218894	SUPT20H	1.66e-05	0.622	154	0.622451
ENSP00000219022	OLFM4	3.19e-05	0.33	215	0.175881
ENSP00000219066	NTHL1	1.08e-05	0.98	418	0.74014
ENSP00000219069	ZNF263	2.06e-05	0.5	403	0.98266
ENSP00000219070	MMP2	1.9e-05	0.386	993	0.919166
ENSP00000219091	ZNF205	1.89e-05	0.678	286	0.987897
ENSP00000219097	ORC6	1.06e-05	0.998	0	0.62628
ENSP00000219139	C16orf70	4.36e-05	0.99	0	0.351231
ENSP00000219150	CORO1A	2.01e-05	0.454	505	0.526531
ENSP00000219169	NUTF2	1.76e-05	0.99	163	0.446232
ENSP00000219172	CENPT	4.29e-05	0.69	907	0
ENSP00000219197	CBLN1	6.03e-05	0.134	544	0.360995
ENSP00000219204	ARL2BP	7.7e-05	0.992	0	0.435094
ENSP00000219207	PLLP	3.99e-05	0.34	196	0.337559
ENSP00000219235	CCL22	1.43e-05	0.778	187	0.658585
ENSP00000219244	CCL17	2.22e-05	0.538	206	0.620161
ENSP00000219255	PARD6A	2.5e-05	0.3	612	0.810523
ENSP00000219271	MMP15	8.62e-05	0.13	506	0.829856
ENSP00000219281	USB1	8.86e-05	0.994	407	0.260441
ENSP00000219299	CCDC113	1.32e-05	0.504	0	0.420502
ENSP00000219301	PRSS54	0.000377279	0	386	0.435498
ENSP00000219313	PSMD7	1.03e-05	0.982	403	0.456852
ENSP00000219315	SETD6	9.22e-05	0.87	224	0.379016
ENSP00000219320	SLC38A7	1.95e-05	0.6	181	0.165469
ENSP00000219334	SMPD3	2.52e-05	0.506	388	0.117352
ENSP00000219343	SLC7A6	2.33e-05	0.756	247	0.311316
ENSP00000219345	PLA2G15	2.54e-05	0.626	342	0.090225
ENSP00000219368	FA2H	1.4e-05	0.89	186	0.210837
ENSP00000219400	CMC2	2.26e-05	0.99	0	0.377775
ENSP00000219406	PDIA2	1e-05	0.888	461	0.500937
ENSP00000219409	ARHGDIG	1.25e-05	0.968	602	0.481633
ENSP00000219431	MPG	1.57e-05	0.956	323	0.196343
ENSP00000219439	HSDL1	1.24e-05	0.99	0	0.175796
ENSP00000219454	WFDC1	2.2e-05	0.546	201	0.756393
ENSP00000219476	TSC2	3.1e-05	0.428	967	0.891313
ENSP00000219478	ZNF500	2.05e-05	0.54	286	0.98485
ENSP00000219479	NME4	1.05e-05	0.954	904	0.785926
ENSP00000219548	STUB1	1.66e-05	0.678	999	0.900256
ENSP00000219551	RHBDL1	1.94e-05	0.354	864	0.404942
ENSP00000219593	ZP2	2.6e-05	0.326	926	0
ENSP00000219596	MEFV	2.63e-05	0.674	654	0.462214
ENSP00000219599	CRYM	2.03e-05	0.514	215	0.163092
ENSP00000219611	SOLH	1.7e-05	0.664	266	0
ENSP00000219700	HMOX2	2.33e-05	0.234	485	0.90532
ENSP00000219746	TOX3	3.84e-05	0.106	376	0.916032
ENSP00000219782	MAZ	1.75e-05	0.506	873	0.964944
ENSP00000219794	BCKDK	2.24e-05	0.584	272	0.394927
ENSP00000219833	SLC6A2	2.86e-05	0.258	301	0.499133
ENSP00000219837	KNOP1	3.96e-05	0.986	0	0.501185
ENSP00000219905	MGA	2.87e-05	0.852	192	0.938037
ENSP00000219919	AQP9	1.54e-05	0.824	236	0.287314
ENSP00000220003	CSK	1.37e-05	0.878	966	0.989313
ENSP00000220058	MTFMT	1.98e-05	0.882	555	0.696075
ENSP00000220062	RASL12	1.55e-05	0.246	548	0.947658
ENSP00000220166	CTSH	2.12e-05	0.878	235	0.282505
ENSP00000220244	KIAA1199	1.8e-05	0.692	193	0
ENSP00000220325	EHD4	4.01e-05	0.66	377	0.207992
ENSP00000220420	TGM5	0.000161306	0.196	330	0.446976
ENSP00000220429	GABPB1	2.47e-05	0.596	201	0.864698
ENSP00000220478	SCG3	3.5e-05	0.358	200	0.27086
ENSP00000220496	DNAJC17	1.13e-05	0.986	204	0.432981
ENSP00000220507	RHOV	1.49e-05	0.322	577	0.916694
ENSP00000220509	VPS18	1.52e-05	0.942	290	0.208053
ENSP00000220514	OIP5	2.44e-05	0.896	212	0.553719
ENSP00000220531	BLOC1S6	2.27e-05	0.994	270	0.225586
ENSP00000220562	EXTL3	1.71e-05	0.336	357	0.648703
ENSP00000220584	FDFT1	1.88e-05	0.76	501	0.438106
ENSP00000220592	AGO2	1.65e-05	0.666	863	0.825481
ENSP00000220597	PAG1	1.69e-05	0.706	961	0.463484
ENSP00000220616	TG	2.37e-05	0.204	951	0.795574
ENSP00000220659	BRF2	1.45e-05	0.758	737	0
ENSP00000220669	ZFAND1	1.86e-05	0.988	0	0.213187
ENSP00000220676	RP1	2.4e-05	0.424	649	0.61397
ENSP00000220751	RIPK2	1.56e-05	0.402	825	0.989318
ENSP00000220763	CPQ	1.49e-05	0.992	0	0.159519
ENSP00000220772	SFRP1	2.71e-05	0.11	731	0.958959
ENSP00000220809	PLAT	4.35e-05	0.074	834	0.747158
ENSP00000220812	DKK4	7.81e-05	0.142	313	0.676121
ENSP00000220822	GDAP1	5.63e-05	0.37	263	0.115915
ENSP00000220849	EIF3E	1.46e-05	0.972	426	0.67313
ENSP00000220853	EMC2	2.38e-05	0.988	0	0.238753
ENSP00000220913	CHRAC1	2.27e-05	0.68	358	0
ENSP00000220931	NCALD	2.6e-05	0.246	483	0.550091
ENSP00000220940	GML	1.56e-05	0.552	258	0.256653
ENSP00000220966	PYCRL	1.24e-05	0.946	355	0.401604
ENSP00000221086	MTMR9	3.66e-05	0.994	431	0.231239
ENSP00000221114	DCTN6	4.32e-05	0.464	903	0.242911
ENSP00000221130	GSR	1.13e-05	0.974	637	0.606234
ENSP00000221132	TNFRSF10A	3.41e-05	0.632	992	0.838742
ENSP00000221138	PPP2CB	1.33e-05	0.35	804	0.97921
ENSP00000221166	NEFM	4.73e-05	0.28	212	0.663454
ENSP00000221167	-	3.08e-05	0.404	319	0
ENSP00000221200	KCTD9	6.09e-05	0.97	420	0.302258
ENSP00000221204	-	6.18e-05	0.204	233	0
ENSP00000221232	CNOT3	1.27e-05	0.906	382	0.556842
ENSP00000221233	EXOSC5	1.62e-05	0.982	286	0.593299
ENSP00000221265	PAF1	2.19e-05	0.628	195	0.650678
ENSP00000221283	STXBP2	1.02e-05	0.976	303	0.272494
ENSP00000221307	CYP4F3	1.65e-05	0.922	219	0.277996
ENSP00000221315	ZNF432	2.26e-05	0.5	286	0.986073
ENSP00000221327	ZNF180	2.31e-05	0.646	286	0.992856
ENSP00000221399	TULP2	5.05e-05	0.886	323	0.239042
ENSP00000221403	DHDH	1.39e-05	0.684	206	0
ENSP00000221418	ECH1	1.42e-05	0.976	609	0.211005
ENSP00000221419	HNRNPL	1.94e-05	0.996	325	0.709644
ENSP00000221421	LHB	0.000113642	0.024	234	0.789018
ENSP00000221444	KCNA7	2.36e-05	0.458	291	0.523739
ENSP00000221452	RELB	1.92e-05	0.764	505	0.933432
ENSP00000221459	LIN7B	4.71e-05	0.192	777	0.24064
ENSP00000221462	PPP1R37	1.32e-05	0.606	0	0.366091
ENSP00000221466	FCGRT	3.06e-05	0.416	241	0.239374
ENSP00000221476	CKM	4.84e-05	0.316	800	0.634869
ENSP00000221480	PEX11G	7.22e-05	0.308	340	0.155791
ENSP00000221485	SLC17A7	3.5e-05	0.098	536	0.675998
ENSP00000221494	SF3A2	1.27e-05	0.988	167	0.44154
ENSP00000221496	AMH	1.98e-05	0.28	732	0.968805
ENSP00000221498	DKKL1	4.78e-05	0.178	357	0.225751
ENSP00000221515	RETN	2.04e-05	0.976	866	0.835792
ENSP00000221538	RSPH6A	1.55e-05	0.7	198	0.375464
ENSP00000221543	TBC1D17	3.79e-05	0.532	198	0.435574
ENSP00000221554	CCDC130	1.99e-05	0.484	439	0.212324
ENSP00000221561	AES	1.61e-05	0.984	592	0.932556
ENSP00000221566	SGTA	2.06e-05	0.164	583	0.707803
ENSP00000221665	FIZ1	2.03e-05	0.65	286	0.987233
ENSP00000221671	C19orf44	0.0033039	0.986	0	0.63976
ENSP00000221700	CYP4F2	1.53e-05	0.934	197	0.288903
ENSP00000221722	ZIM2	2.38e-05	0.48	286	0
ENSP00000221730	EPHX3	8.45e-05	0.162	191	0.410583
ENSP00000221740	CASP14	5.22e-05	0.638	394	0
ENSP00000221742	SLC1A6	3.42e-05	0.146	632	0.244665
ENSP00000221797	LGALS13	2.59e-05	0.452	151	0.282613
ENSP00000221804	CLC	5.66e-05	0.276	242	0.1463
ENSP00000221847	EBI3	2.93e-05	0.468	157	0.275209
ENSP00000221855	TBCB	2.38e-05	0.984	171	0.187591
ENSP00000221856	FSD1	7.22e-05	0.64	150	0.289371
ENSP00000221891	APLP1	2.85e-05	0.298	450	0.61209
ENSP00000221922	CCDC9	2.97e-05	0.994	0	0.316612
ENSP00000221930	TGFB1	1.18e-05	0.638	969	0
ENSP00000221957	PLIN3	2.82e-05	0.966	198	0.199197
ENSP00000221972	CD79A	2.84e-05	0.096	620	0.848742
ENSP00000221973	LIM2	3.32e-05	0.302	483	0.291215
ENSP00000221980	ICAM5	3.12e-05	0.326	410	0.530518
ENSP00000221992	CEACAM5	3.41e-05	0.322	217	0.176482
ENSP00000221996	CRX	1.99e-05	0.392	725	0.927706
ENSP00000222002	SULT2A1	2.54e-05	0.206	381	0.546636
ENSP00000222005	CDC37	0.000297857	0.986	997	0.765038
ENSP00000222008	RABAC1	1.13e-05	0.984	211	0.289767
ENSP00000222032	CNFN	8.97e-05	0.146	309	0.543331
ENSP00000222115	HAS1	1.58e-05	0.496	548	0.633756
ENSP00000222120	RAB3D	1.12e-05	0.986	181	0.241455
ENSP00000222122	DBP	1.23e-05	0.69	0	0.602041
ENSP00000222125	CAPS	1.74e-05	0.252	226	0.979547
ENSP00000222139	EPOR	1.39e-05	0.986	832	0.870687
ENSP00000222145	RASIP1	2.75e-05	0.166	424	0.699702
ENSP00000222157	FGF21	2.09e-05	0.954	886	0.899788
ENSP00000222212	CACNG7	2.85e-05	0.222	900	0.430995
ENSP00000222219	DNASE2	2.21e-05	0.722	300	0.527454
ENSP00000222224	LENG1	2.99e-05	0.22	0	0.482133
ENSP00000222248	SLC5A5	1.47e-05	0.442	505	0.38383
ENSP00000222250	ARRDC2	1.48e-05	0.968	216	0.195638
ENSP00000222254	PIK3R2	3.31e-05	0.676	943	0.747058
ENSP00000222256	RAB3A	1.97e-05	0.518	325	0.35108
ENSP00000222266	PSENEN	2.26e-05	0.726	918	0.608696
ENSP00000222270	WBP7	1.95e-05	0.4	563	0
ENSP00000222271	COMP	3.63e-05	0.064	715	0.78594
ENSP00000222275	UPK1A	7.07e-05	0.288	201	0.337667
ENSP00000222284	TMEM147	1.84e-05	0.988	0	0.300715
ENSP00000222286	GAPDHS	1.36e-05	0.62	325	0.624587
ENSP00000222304	HAMP	2.03e-05	0.608	832	0.668527
ENSP00000222305	USF2	2.62e-05	0.632	325	0.916141
ENSP00000222307	KXD1	2.8e-05	0.926	597	0.215352
ENSP00000222308	FKBP8	1.47e-05	0.774	383	0.629065
ENSP00000222329	ERF	4.18e-05	0.762	912	0.817744
ENSP00000222330	GSK3A	1.48e-05	0.346	692	0.990355
ENSP00000222345	SIPA1L3	5.69e-05	0.95	184	0.268138
ENSP00000222374	CADM4	5.42e-05	0.804	383	0.301158
ENSP00000222381	PON1	1.96e-05	0.36	700	0.757606
ENSP00000222382	CYP3A43	2.05e-05	0.608	348	0.272145
ENSP00000222388	ABCF2	1.98e-05	0.762	557	0.576604
ENSP00000222390	HGF	1.77e-05	0.574	981	0.898756
ENSP00000222399	LAMB1	0.00010338	0.074	952	0.760441
ENSP00000222462	WNT16	3.67e-05	0.062	470	0.975156
ENSP00000222482	CPA4	1.26e-05	0.988	167	0.162073
ENSP00000222511	GTPBP10	1.42e-05	0.91	860	0.733221
ENSP00000222543	TFPI2	4.51e-05	0.086	695	0.695569
ENSP00000222547	BET1	1.42e-05	0.938	193	0.290914
ENSP00000222553	NAMPT	1.41e-05	0.994	356	0.71733
ENSP00000222572	PON2	2.79e-05	0.94	416	0.511862
ENSP00000222573	ITGB8	9.46e-05	0.118	849	0.727439
ENSP00000222574	HBP1	3.32e-05	0.988	0	0.562019
ENSP00000222584	SP4	1.95e-05	0.556	286	0.961816
ENSP00000222598	DLX5	2.19e-05	0.606	527	0.964126
ENSP00000222644	MPP6	2.72e-05	0.246	760	0.596241
ENSP00000222673	OGDH	1.12e-05	0.944	202	0.590805
ENSP00000222674	NPVF	1.02e-05	0.55	0	0.291188
ENSP00000222693	CAV2	6.17e-05	0.16	945	0.772525
ENSP00000222718	HOXA2	1.68e-05	0.728	551	0.967922
ENSP00000222725	LFNG	1.46e-05	0.704	901	0.905451
ENSP00000222726	HOXA5	3.5e-05	0.708	873	0.963504
ENSP00000222728	HOXA6	3.91e-05	0.69	284	0.939738
ENSP00000222747	TSPAN12	5.86e-05	0.114	339	0.222055
ENSP00000222753	HOXA13	3.92e-05	0.426	694	0.956584
ENSP00000222792	CHN2	2.67e-05	0.166	530	0.631652
ENSP00000222800	ABHD11	2.64e-05	0.462	309	0.167123
ENSP00000222803	FKBP14	1.59e-05	0.908	236	0.398354
ENSP00000222812	STX1A	1.18e-05	0.94	288	0.341329
ENSP00000222823	NOD1	2.6e-05	0.448	818	0.83691
ENSP00000222902	CCL24	0.000116438	0.628	0	0.47519
ENSP00000222968	PDAP1	2.79e-05	0.996	0	0.270242
ENSP00000222969	BUD31	1.32e-05	0.93	293	0.312321
ENSP00000222982	CYP3A5	1.49e-05	0.746	519	0.365598
ENSP00000222990	SNX8	3.15e-05	0.62	400	0.176714
ENSP00000223023	WASL	2.8e-05	0.316	663	0.73612
ENSP00000223026	HYAL4	4.77e-05	0.37	668	0.191986
ENSP00000223029	AIMP2	1.22e-05	0.996	925	0.370158
ENSP00000223051	TFR2	3.93e-05	0.584	232	0.431431
ENSP00000223054	MOSPD3	2.67e-05	0.654	287	0.116829
ENSP00000223061	PCOLCE	6.72e-05	0.104	737	0.651112
ENSP00000223095	SERPINE1	1.37e-05	0.936	990	0.881458
ENSP00000223114	MOGAT3	1.59e-05	0.99	0	0.144216
ENSP00000223122	C1GALT1	1.72e-05	0.82	910	0.413177
ENSP00000223127	PLOD3	5.98e-05	0.242	900	0.232258
ENSP00000223129	RPA3	4.69e-05	0.472	900	0.551346
ENSP00000223136	FIS1	1.54e-05	0.946	250	0.278446
ENSP00000223167	MYL10	3.32e-05	0.066	563	0.747109
ENSP00000223190	NRF1	2.73e-05	0.984	401	0.796249
ENSP00000223208	CEP41	1.54e-05	0.542	0	0.285878
ENSP00000223210	ZNF862	1.8e-05	0.628	286	0.985327
ENSP00000223271	RARRES2	6.74e-05	0.19	814	0.393678
ENSP00000223293	GIMAP2	5.15e-05	0.356	200	0.342802
ENSP00000223321	PSMA2	1.4e-05	0.874	342	0.453203
ENSP00000223336	COA1	0.000124448	0.996	0	0.444367
ENSP00000223357	AEBP1	1.7e-05	0.728	191	0.239893
ENSP00000223364	MYL7	3.25e-05	0.08	759	0.739093
ENSP00000223366	GCK	1.04e-05	0.882	414	0.95907
ENSP00000223368	BCL7B	4.66e-05	0.184	242	0.337765
ENSP00000223398	CLIP2	7.43e-05	0.126	541	0.612687
ENSP00000223428	ZNF510	2.43e-05	0.508	459	0.990501
ENSP00000223459	ZNF688	2.38e-05	0.654	286	0.993934
ENSP00000223500	CHMP5	1.44e-05	0.716	205	0
ENSP00000223528	FKTN	8.06e-05	0.05	642	0.410927
ENSP00000223641	SEC61B	1.53e-05	0.914	816	0.322715
ENSP00000223642	C5	5.73e-05	0.32	900	0.803136
ENSP00000224073	EDF1	1.99e-05	0.896	178	0.533417
ENSP00000224140	SETX	1.13e-05	0.964	390	0.61606
ENSP00000224237	VIM	1.41e-05	0.522	905	0.869944
ENSP00000224337	BLNK	1.87e-05	0.638	163	0.638366
ENSP00000224356	CYP26A1	1.29e-05	0.958	349	0.588566
ENSP00000224600	RBP3	1.72e-05	0.494	0	0
ENSP00000224605	GDF10	4.12e-05	0.088	234	0
ENSP00000224652	ATE1	3.16e-05	0.922	328	0.270929
ENSP00000224764	-	2.27e-05	0.484	444	0
ENSP00000224784	ACTA2	1.43e-05	0.332	795	0.981685
ENSP00000224807	SFXN3	4.74e-05	0.996	169	0.206374
ENSP00000224862	FBXL15	1.86e-05	0.994	0	0.158027
ENSP00000224950	OBFC1	2.71e-05	0.788	546	0.634584
ENSP00000225171	DNAJC12	1.02e-05	0.986	158	0.199145
ENSP00000225174	PPIF	2.19e-05	0.254	945	0.660789
ENSP00000225235	TBC1D12	3.98e-05	0.144	198	0.383073
ENSP00000225245	CCL3	2.39e-05	0.27	470	0
ENSP00000225275	MPO	3.91e-05	0.38	174	0.579238
ENSP00000225276	ST6GALNAC2	5.03e-05	0.17	900	0.465592
ENSP00000225296	DHX33	1.08e-05	0.984	933	0.605495
ENSP00000225328	P2RX5	3.85e-05	0.996	0	0.216766
ENSP00000225371	EPX	1.66e-05	0.454	355	0.625173
ENSP00000225387	CRYBA1	2.46e-05	0.464	349	0.666373
ENSP00000225388	NUFIP2	4.08e-05	0.988	150	0.37272
ENSP00000225396	TADA2A	1.38e-05	0.548	908	0
ENSP00000225402	AATF	1.05e-05	0.952	300	0
ENSP00000225426	PSMB3	1.24e-05	0.982	577	0
ENSP00000225428	CWC25	2.56e-05	0.46	172	0
ENSP00000225430	RPL19	1.56e-05	0.996	274	0.688291
ENSP00000225474	CSF3	1.45e-05	0.608	454	0.860267
ENSP00000225504	SUPT4H1	2.03e-05	0.83	249	0.922796
ENSP00000225512	WNT3	2.96e-05	0.082	562	0.980371
ENSP00000225519	SHPK	1.27e-05	0.952	200	0.399643
ENSP00000225525	TAX1BP3	2.19e-05	0.996	0	0.272689
ENSP00000225538	P2RX1	5.84e-05	0.036	390	0.597237
ENSP00000225550	KRT37	1.04e-05	0.558	0	0.475907
ENSP00000225567	GOSR2	1.69e-05	0.682	215	0.3259
ENSP00000225573	PNPO	6.57e-05	0.902	550	0.224232
ENSP00000225576	TVP23C	6.76e-05	0.346	330	0.295366
ENSP00000225577	RPS6KB1	1.62e-05	0.334	926	0
ENSP00000225603	CBX1	3.43e-05	0.536	576	0.906676
ENSP00000225609	PIGL	2.56e-05	0.546	227	0.153518
ENSP00000225614	GALK1	1.93e-05	0.482	394	0.366422
ENSP00000225648	HOXB6	3.33e-05	0.152	340	0.952309
ENSP00000225655	PFN1	2.17e-05	0.842	414	0.741196
ENSP00000225665	SLC25A11	2.78e-05	0.82	410	0.433846
ENSP00000225688	RASD1	1.37e-05	0.662	622	0.945511
ENSP00000225698	C1QBP	1.61e-05	0.428	416	0.856716
ENSP00000225719	CPD	4.35e-05	0.984	0	0.218837
ENSP00000225724	GOSR1	1.14e-05	0.97	804	0.128522
ENSP00000225726	CCDC47	1.78e-05	0.988	0	0.268171
ENSP00000225728	MED31	3.34e-05	0.388	387	0.839661
ENSP00000225729	DRG2	4.11e-05	0.34	275	0.402841
ENSP00000225737	AKAP10	4.39e-05	0.146	569	0.400341
ENSP00000225777	SYNGR2	3.04e-05	0.996	0	0.308143
ENSP00000225805	C17orf75	1.39e-05	0.726	0	0.388179
ENSP00000225823	ASIC2	5.58e-05	0.064	499	0.490042
ENSP00000225831	CCL2	1.45e-05	0.642	866	0.869468
ENSP00000225842	CCL1	8.23e-05	0.698	580	0.386262
ENSP00000225844	CCL13	2.39e-05	0.576	516	0.588507
ENSP00000225893	HNF1B	1.98e-05	0.372	918	0
ENSP00000225899	KRT32	9.79e-05	0.086	449	0.373362
ENSP00000225916	KAT2A	1.19e-05	0.828	840	0
ENSP00000225927	NAGLU	1.73e-05	0.994	0	0.15075
ENSP00000225941	ABI3	1.79e-05	0.47	621	0.380971
ENSP00000225964	COL1A1	3.42e-05	0.22	943	0.934443
ENSP00000225972	LRRC59	7.45e-05	0.446	356	0.408327
ENSP00000225983	HDAC5	1.38e-05	0.84	513	0
ENSP00000225992	PPY	1.53e-05	0.674	906	0.787632
ENSP00000226004	DUSP3	2.51e-05	0.728	626	0.782435
ENSP00000226021	CACNG1	3.66e-05	0.354	731	0.457599
ENSP00000226067	HLF	2.34e-05	0.538	226	0.750191
ENSP00000226091	EFNB3	5.99e-05	0.056	960	0.798819
ENSP00000226105	RANGRF	3.02e-05	0.986	0	0.189659
ENSP00000226193	RCVRN	2.6e-05	0.146	398	0.654063
ENSP00000226209	MYH3	2.76e-05	0.168	937	0
ENSP00000226218	SEBOX	2.49e-05	0.124	907	0
ENSP00000226225	TNFAIP1	4.18e-05	0.364	904	0.219943
ENSP00000226230	TMEM97	2.58e-05	0.606	225	0.278167
ENSP00000226247	FOXN1	1.71e-05	0.386	252	0
ENSP00000226253	ALDOC	1.76e-05	0.832	186	0.288037
ENSP00000226279	CD38	2.46e-05	0.144	845	0.764786
ENSP00000226284	IBSP	1.99e-05	0.704	649	0.92434
ENSP00000226299	LAP3	1.49e-05	0.78	562	0.470265
ENSP00000226317	CXCL6	1.8e-05	0.596	900	0.811015
ENSP00000226319	PHF17	3.5e-05	0.358	274	0
ENSP00000226355	AFM	2.49e-05	0.51	246	0.394175
ENSP00000226382	PHOX2B	4.14e-05	0.146	329	0.855866
ENSP00000226413	GNRHR	1.65e-05	0.602	924	0.763352
ENSP00000226432	CWH43	2.89e-05	0.76	167	0.180066
ENSP00000226444	SULT1E1	1.74e-05	0.518	297	0.60279
ENSP00000226524	PF4V1	1.03e-05	0.716	0	0.316284
ENSP00000226574	NFKB1	1.33e-05	0.472	967	0
ENSP00000226578	MANBA	1.35e-05	0.734	378	0.229251
ENSP00000226730	IL2	1.23e-05	0.916	660	0.857791
ENSP00000226760	WFS1	3.51e-05	0.388	284	0.346666
ENSP00000226798	FRG1	4.47e-05	0.224	271	0.306646
ENSP00000226840	AADAT	1.6e-05	0.984	243	0.171007
ENSP00000226951	CLNK	5.04e-05	0.31	216	0.248436
ENSP00000227065	FAM149A	0.000115213	0.086	263	0.282231
ENSP00000227135	SPA17	8.26e-05	0.234	537	0.424396
ENSP00000227155	CD82	1.97e-05	0.574	988	0.889119
ENSP00000227163	SPI1	1.32e-05	0.97	912	0.952118
ENSP00000227251	CRYAB	2.14e-05	0.302	818	0.766884
ENSP00000227256	DBX1	2.92e-05	0.41	507	0
ENSP00000227266	CTSC	2.13e-05	0.424	472	0.768093
ENSP00000227322	ZNF259	1.81e-05	0.99	632	0
ENSP00000227348	CRTAM	1.11e-05	0.548	0	0.266668
ENSP00000227349	C11orf63	0.000326008	0.988	0	0.585477
ENSP00000227451	DTX4	3.72e-05	0.666	835	0.280461
ENSP00000227471	UNC93B1	4.23e-05	0.594	577	0.459202
ENSP00000227495	ST3GAL4	3.37e-05	0.652	913	0.382727
ENSP00000227507	CCND1	1.23e-05	0.712	979	0
ENSP00000227520	CCDC86	4.66e-05	0.948	215	0.325355
ENSP00000227525	TMEM109	1.67e-05	0.996	0	0.330497
ENSP00000227618	ANAPC15	2.51e-05	0.476	211	0.408122
ENSP00000227638	PANX1	7.57e-05	0.474	948	0.392156
ENSP00000227665	APOA5	1.16e-05	0.83	972	0.511326
ENSP00000227667	APOC3	2.78e-05	0.5	987	0.829832
ENSP00000227752	IL10RA	3.04e-05	0.72	304	0.674215
ENSP00000227756	GALNT18	9.45e-05	0.052	302	0.262213
ENSP00000227758	BIRC2	1.9e-05	0.916	971	0.889623
ENSP00000227880	SLC15A3	2.05e-05	0.896	170	0.133479
ENSP00000227918	SCGB2A2	7.92e-05	0.13	499	0.290378
ENSP00000228027	DGAT2	1.38e-05	0.958	634	0.428664
ENSP00000228136	C11orf58	3.58e-05	0.994	0	0.273388
ENSP00000228251	YBX3	1.29e-05	0.994	823	0.638138
ENSP00000228280	KITLG	1.74e-05	0.732	874	0.916554
ENSP00000228289	ZNF268	1.68e-05	0.792	286	0.988533
ENSP00000228307	PXN	2.29e-05	0.472	976	0.889982
ENSP00000228318	SLC25A3	1.21e-05	0.944	550	0.329526
ENSP00000228434	CD69	1.26e-05	0.726	582	0.822081
ENSP00000228437	PRDM4	1.97e-05	0.568	413	0.973214
ENSP00000228438	CLEC2B	2.63e-05	0.288	323	0.486018
ENSP00000228463	SELPLG	1.37e-05	0.616	597	0.639457
ENSP00000228468	ASIC1	3.91e-05	0.148	434	0.464469
ENSP00000228476	DAO	5.18e-05	0.082	436	0.374575
ENSP00000228495	KCTD10	3.32e-05	0.71	733	0.238659
ENSP00000228506	MLEC	3.52e-05	0.994	0	0.2682
ENSP00000228510	MVK	2.88e-05	0.728	505	0.31558
ENSP00000228515	CSRNP2	1.74e-05	0.482	0	0.29196
ENSP00000228534	IL23A	1.91e-05	0.58	381	0.691418
ENSP00000228567	SYT10	2.83e-05	0.512	259	0.306815
ENSP00000228606	CYP27B1	2.76e-05	0.222	528	0.631714
ENSP00000228641	MYF6	2.94e-05	0.108	721	0.944737
ENSP00000228644	MYF5	2.4e-05	0.134	753	0.954943
ENSP00000228682	GLI1	1.51e-05	0.34	887	0.982698
ENSP00000228705	PPM1H	1.97e-05	0.994	0	0.379875
ENSP00000228740	LTA4H	1.83e-05	0.988	298	0.341004
ENSP00000228741	ELK3	5.85e-05	0.88	404	0.584751
ENSP00000228799	ITFG2	1.59e-05	0.98	0	0.337604
ENSP00000228811	PRR4	0.00010234	0.996	0	0.386107
ENSP00000228825	ARPC3	3.21e-05	0.446	928	0.451664
ENSP00000228837	FGF6	2.88e-05	0.912	901	0.955843
ENSP00000228841	MYL2	2.95e-05	0.06	975	0.861737
ENSP00000228843	RAD51AP1	2.8e-05	0.84	167	0.682314
ENSP00000228850	AKAP3	8.63e-05	0.092	264	0.298438
ENSP00000228862	DUSP16	1.99e-05	0.312	269	0.802202
ENSP00000228865	CREBL2	1.53e-05	0.994	0	0.360645
ENSP00000228872	CDKN1B	1.36e-05	0.9	832	0.970902
ENSP00000228918	LTBR	2.5e-05	0.708	288	0.822435
ENSP00000228938	MGP	1.95e-05	0.15	392	0.832026
ENSP00000228945	ARHGDIB	1.53e-05	0.916	602	0.568673
ENSP00000229002	RERGL	1.6e-05	0.268	548	0.936064
ENSP00000229030	FZD10	5.51e-05	0.048	292	0.801375
ENSP00000229134	IL26	1.09e-05	0.744	163	0.517958
ENSP00000229135	IFNG	1.12e-05	0.758	492	0
ENSP00000229179	NUP107	1.35e-05	0.826	905	0
ENSP00000229195	CNOT2	2.9e-05	0.282	298	0.525436
ENSP00000229239	GAPDH	1.03e-05	0.728	983	0
ENSP00000229243	ACRBP	5.59e-05	0.142	632	0.372616
ENSP00000229251	COPS7A	1.96e-05	0.99	430	0.35517
ENSP00000229264	GNB3	1.66e-05	0.352	438	0.986876
ENSP00000229266	CHPT1	1.14e-05	0.994	0	0.065432
ENSP00000229281	C12orf57	0.000113296	0.246	196	0.352581
ENSP00000229304	APOBEC1	3.6e-05	0.126	748	0.356525
ENSP00000229307	NANOG	1.64e-05	0.928	964	0.950368
ENSP00000229314	GOLT1B	3.81e-05	0.994	175	0.289686
ENSP00000229328	PRKAB1	2.03e-05	0.796	981	0
ENSP00000229329	CMAS	1.9e-05	0.636	262	0.429977
ENSP00000229330	HCFC2	3.37e-05	0.154	266	0.726709
ENSP00000229332	CLEC4A	2.15e-05	0.598	282	0.310617
ENSP00000229335	AICDA	1.41e-05	0.704	284	0.778152
ENSP00000229340	RAB35	1.22e-05	0.99	0	0.170669
ENSP00000229379	COX6A1	2.15e-05	0.642	485	0.419013
ENSP00000229390	SRSF9	1.08e-05	0.988	258	0.621704
ENSP00000229395	FGFR1OP2	2.59e-05	0.99	0	0.172351
ENSP00000229402	KLRB1	1.75e-05	0.566	360	0.602889
ENSP00000229416	GCLC	1.86e-05	0.978	861	0.628544
ENSP00000229447	IYD	1.03e-05	0.876	159	0.173131
ENSP00000229554	RSPH4A	4.83e-05	0.08	725	0.646112
ENSP00000229563	TMEM14C	7.44e-05	0.244	187	0.375718
ENSP00000229570	SMIM8	1.83e-05	0.982	0	0.585549
ENSP00000229595	ASF1A	1.23e-05	0.99	938	0.919503
ENSP00000229633	HINT3	0.00031829	0.424	150	0.509747
ENSP00000229708	ULBP1	2.59e-05	0.986	0	0.2138
ENSP00000229729	SLC44A4	1.11e-05	0.788	203	0.288732
ENSP00000229758	FBXO5	1.62e-05	0.994	167	0.655075
ENSP00000229769	FANCE	3.98e-05	0.992	224	0.649364
ENSP00000229771	TULP1	3.54e-05	0.254	804	0.640862
ENSP00000229794	MAPK14	1.32e-05	0.428	999	0
ENSP00000229812	STK38	1.65e-05	0.39	490	0.987057
ENSP00000229824	RAB44	2.2e-05	0.646	499	0.469457
ENSP00000229854	MCM3	1.62e-05	0.666	807	0.712979
ENSP00000229903	SAYSD1	0.000444246	0.996	0	0.676839
ENSP00000229922	CAP2	2.99e-05	0.28	655	0.675831
ENSP00000229955	GPR63	3.6e-05	0.34	321	0.544626
ENSP00000229971	FBXL4	1.84e-05	0.548	174	0
ENSP00000230012	HDGFL1	6.22e-05	0.424	643	0
ENSP00000230036	GPLD1	1.26e-05	0.802	258	0.1418
ENSP00000230048	ACOT13	1.92e-05	0.948	170	0.193703
ENSP00000230053	B3GAT2	4.39e-05	0.184	337	0.308472
ENSP00000230056	GMNN	1.32e-05	0.99	0	0.545104
ENSP00000230085	SNX3	1.84e-05	0.988	201	0.160207
ENSP00000230099	TRIM38	0.000152187	0.978	213	0
ENSP00000230122	ZBTB24	1.65e-05	0.696	286	0.982624
ENSP00000230124	FIG4	1.72e-05	0.822	266	0.250116
ENSP00000230256	UNC93A	3.75e-05	0.358	197	0.262161
ENSP00000230301	C6orf118	0.000143113	0.044	472	0.415399
ENSP00000230321	MDFI	2.02e-05	0.774	286	0.243748
ENSP00000230323	TFEB	1.39e-05	0.674	213	0
ENSP00000230354	TBP	1.36e-05	0.692	999	0
ENSP00000230361	GUCA1B	3.86e-05	0.118	398	0.606082
ENSP00000230381	PRPH2	3.09e-05	0.372	394	0.608928
ENSP00000230419	PTK7	1.59e-05	0.552	627	0.995555
ENSP00000230431	DNPH1	2.51e-05	0.65	261	0.608039
ENSP00000230449	EXOC2	2.53e-05	0.6	935	0.377854
ENSP00000230461	TMEM30A	2.86e-05	0.998	280	0.189642
ENSP00000230538	LAMA4	0.000167436	0.046	313	0.540082
ENSP00000230565	ENPP5	3.67e-05	0.642	281	0.214206
ENSP00000230568	LY86	2.31e-05	0.528	936	0.198597
ENSP00000230582	PRSS16	6.34e-05	0.078	800	0.311753
ENSP00000230588	MEP1A	9.8e-05	0.05	601	0.219617
ENSP00000230640	SKIV2L2	1.03e-05	0.978	282	0.610533
ENSP00000230658	ISL1	1.89e-05	0.764	323	0.949088
ENSP00000230671	SLC6A7	4.08e-05	0.788	864	0.426974
ENSP00000230732	POU4F3	1.92e-05	0.59	242	0.912813
ENSP00000230792	NUDT12	1.19e-05	0.99	165	0.276858
ENSP00000230882	GHR	1.11e-05	0.978	641	0.820348
ENSP00000230895	DAP	2.88e-05	0.798	909	0.74915
ENSP00000230990	HBEGF	1.66e-05	0.52	998	0.904977
ENSP00000231004	LOX	3.43e-05	0.202	812	0.875633
ENSP00000231061	SPARC	2.6e-05	0.304	951	0.94607
ENSP00000231121	HAND1	2.2e-05	0.346	255	0.942363
ENSP00000231130	PCDHB3	0.000193471	0.568	156	0.739308
ENSP00000231134	PCDHB5	5.72e-05	0.948	0	0.633791
ENSP00000231136	PCDHB6	5.02e-05	0.252	0	0.696529
ENSP00000231173	PCDHB15	0.000195419	0.546	171	0.772046
ENSP00000231188	GRM6	2.15e-05	0.34	907	0.904644
ENSP00000231198	THG1L	5.2e-05	0.878	150	0.221961
ENSP00000231228	IL12B	1.73e-05	0.62	624	0.735187
ENSP00000231238	TTC1	2.05e-05	0.94	205	0.228662
ENSP00000231357	IRX4	5.3e-05	0.138	639	0.948537
ENSP00000231420	AGXT2	2.86e-05	0.326	629	0.180939
ENSP00000231449	IL4	1.42e-05	0.888	925	0.855821
ENSP00000231454	IL5	1.54e-05	0.72	394	0.807094
ENSP00000231461	ST8SIA4	3.33e-05	0.216	266	0.324062
ENSP00000231484	PCDH12	2.43e-05	0.402	0	0.564013
ENSP00000231487	SKP1	1.66e-05	0.432	719	0.911001
ENSP00000231498	NUP155	1.04e-05	0.994	0	0.444092
ENSP00000231509	NR3C1	1.38e-05	0.986	951	0.958253
ENSP00000231512	C5orf15	6.8e-05	0.988	150	0.30143
ENSP00000231524	TRIM23	1.14e-05	0.96	197	0.354111
ENSP00000231656	CDX1	1.89e-05	0.246	952	0.973969
ENSP00000231668	BNIP1	1.63e-05	0.992	0	0.116991
ENSP00000231706	SLC7A14	1.41e-05	0.94	247	0.325519
ENSP00000231721	SEMA3G	8.1e-05	0.058	604	0.698951
ENSP00000231749	ZMYND10	3.42e-05	0.5	516	0.36649
ENSP00000231751	LTF	2.45e-05	0.556	666	0.579936
ENSP00000231790	MLH1	1.39e-05	0.772	995	0.7872
ENSP00000231948	CRBN	5.83e-05	0.528	516	0.234836
ENSP00000232003	HRG	1.91e-05	0.612	325	0.535835
ENSP00000232014	BCL6	1.29e-05	0.664	992	0.955712
ENSP00000232217	RBP2	2.55e-05	0.516	919	0.499609
ENSP00000232219	RBP1	3.45e-05	0.552	920	0.730629
ENSP00000232375	PFKFB4	1.27e-05	0.968	276	0.229719
ENSP00000232424	HES1	3.17e-05	0.954	565	0.928423
ENSP00000232458	ECT2	2.56e-05	0.57	410	0.701841
ENSP00000232461	GNAT1	1.94e-05	0.338	933	0.986008
ENSP00000232496	TUSC2	2.88e-05	0.79	0	0.237402
ENSP00000232501	NPRL2	2.92e-05	0.814	199	0.173687
ENSP00000232519	C3orf14	3.1e-05	0.464	198	0.384934
ENSP00000232564	GNB4	1.76e-05	0.332	925	0.988837
ENSP00000232603	MORC1	5.45e-05	0.472	325	0.374456
ENSP00000232607	UMPS	1.16e-05	0.48	995	0
ENSP00000232744	ABTB1	2.69e-05	0.252	201	0.893786
ENSP00000232766	KLHL18	3.32e-05	0.404	393	0.806725
ENSP00000232892	AADAC	1.14e-05	0.778	262	0.153798
ENSP00000232905	EIF1B	1.33e-05	0.99	181	0.545154
ENSP00000232974	ZBTB47	2.08e-05	0.634	328	0.983763
ENSP00000232975	TNNC1	1.78e-05	0.276	918	0.973347
ENSP00000232978	NKTR	1.23e-05	0.992	410	0.601301
ENSP00000233025	SPCS1	1.38e-05	0.974	173	0.382669
ENSP00000233027	NEK4	4.21e-05	0.31	171	0.237595
ENSP00000233047	TMEM159	0.000274599	0.99	0	0.481752
ENSP00000233055	WDFY1	1.76e-05	0.988	151	0.332347
ENSP00000233057	EIF2AK2	2.77e-05	0.916	996	0.752111
ENSP00000233078	DAZAP1	2.33e-05	0.992	197	0.521761
ENSP00000233099	HEATR5B	2.9e-05	0.992	375	0.208743
ENSP00000233121	MAPRE3	3.49e-05	0.184	727	0.603542
ENSP00000233143	TMSB10	3.8e-05	0.762	242	0.231639
ENSP00000233146	MSH2	1.43e-05	0.648	999	0.771549
ENSP00000233154	NCK2	4.11e-05	0.212	983	0.741041
ENSP00000233156	TFPI	2.57e-05	0.65	844	0.704327
ENSP00000233202	SLC11A1	2.21e-05	0.81	540	0.589695
ENSP00000233331	INO80B	6.1e-05	0.124	181	0.345212
ENSP00000233336	TTL	1.95e-05	0.902	472	0.560178
ENSP00000233379	FAHD2A	1.71e-05	0.992	0	0.176276
ENSP00000233535	SLC30A3	2.89e-05	0.524	625	0.370152
ENSP00000233557	NRBP1	2.79e-05	0.986	185	0.677377
ENSP00000233575	SNX17	6.21e-05	0.612	653	0.272814
ENSP00000233596	REEP6	1.7e-05	0.95	154	0.209154
ENSP00000233607	APC2	3.8e-05	0.43	420	0.787784
ENSP00000233615	WBP1	0.000169229	0.076	158	0.439176
ENSP00000233616	MOGS	1.54e-05	0.958	442	0.321608
ENSP00000233630	PCGF1	5.52e-05	0.352	237	0.834555
ENSP00000233638	TLX2	2.74e-05	0.984	663	0.765144
ENSP00000233668	DOK1	3.95e-05	0.872	531	0.584691
ENSP00000233712	EVA1A	8.95e-05	0.986	0	0.530738
ENSP00000233714	LANCL1	2.78e-05	0.89	161	0.235866
ENSP00000233735	REG1A	0.0001032	0.036	359	0.290852
ENSP00000233809	IGFBP2	1.48e-05	0.64	896	0.857616
ENSP00000233813	IGFBP5	2.65e-05	0.362	977	0.870167
ENSP00000233826	KCNJ13	4.42e-05	0.172	370	0.485475
ENSP00000233838	GGCX	7.69e-05	0.396	385	0.2012
ENSP00000233840	NEU2	2.23e-05	0.424	342	0.184887
ENSP00000233944	PRKAG3	1.47e-05	0.7	962	0.95241
ENSP00000233946	IL1R1	3.11e-05	0.53	562	0
ENSP00000233948	WNT6	2.36e-05	0.406	549	0.959429
ENSP00000233954	IL1RL1	3.03e-05	0.216	258	0.699195
ENSP00000233957	IL18R1	2.37e-05	0.522	225	0.651598
ENSP00000233969	SLC9A2	2.37e-05	0.674	566	0.468471
ENSP00000233997	AZU1	3.17e-05	0.178	404	0.639985
ENSP00000234038	PPP1R7	2.22e-05	0.45	208	0.792509
ENSP00000234040	PASK	1.36e-05	0.928	496	0.984607
ENSP00000234071	PROC	1.97e-05	0.516	633	0.832869
ENSP00000234091	ID2	2.31e-05	0.452	886	0.960096
ENSP00000234142	GREB1	2.1e-05	0.536	197	0.244602
ENSP00000234160	GORASP2	1.26e-05	0.934	194	0.1607
ENSP00000234170	CEBPZ	1.36e-05	0.958	624	0.634058
ENSP00000234179	PRKD3	3.8e-05	0.408	370	0.459646
ENSP00000234195	RMDN2	5.09e-05	0.984	0	0.223629
ENSP00000234198	DLX2	2.07e-05	0.668	511	0.949009
ENSP00000234256	SLC1A4	1.26e-05	0.972	561	0.221132
ENSP00000234296	ORC2	1.35e-05	0.9	259	0
ENSP00000234301	COX7A2L	8.28e-05	0.99	197	0.270699
ENSP00000234310	PPP3R1	1.71e-05	0.602	833	0.980243
ENSP00000234313	PLEK	1.45e-05	0.842	581	0.846642
ENSP00000234347	PRTN3	1.25e-05	0.746	457	0.750909
ENSP00000234371	KISS1R	2.68e-05	0.372	912	0.756322
ENSP00000234389	GRIN3B	5.09e-05	0.056	905	0.563762
ENSP00000234392	VAX2	3.03e-05	0.414	238	0.862259
ENSP00000234396	ATP6V1B1	1.39e-05	0.914	210	0.194958
ENSP00000234420	MSH6	1.23e-05	0.848	971	0.725182
ENSP00000234453	PLEKHA3	1.38e-05	0.99	0	0.144416
ENSP00000234454	SPR	2.92e-05	0.992	0	0.145884
ENSP00000234488	CLCN6	2.33e-05	0.838	195	0.454128
ENSP00000234626	CDC7	1.32e-05	0.96	349	0.704171
ENSP00000234701	CLCA1	6.57e-05	0.07	305	0.363457
ENSP00000234739	BCL9	2.18e-05	0.546	179	0.611393
ENSP00000234798	TPSG1	2.21e-05	0.486	700	0.379267
ENSP00000234800	SLC35E2B	4.17e-05	0.29	198	0
ENSP00000234816	ANGPTL1	2.02e-05	0.612	236	0.184918
ENSP00000234831	TMEM59	6.15e-05	0.994	175	0.317536
ENSP00000234961	OPRD1	2.46e-05	0.59	920	0.840304
ENSP00000235090	WDR77	1.71e-05	0.922	235	0.597714
ENSP00000235180	DLGAP3	0.000104339	0.064	584	0.430497
ENSP00000235307	C1orf21	1.15e-05	0.98	0	0.593079
ENSP00000235310	MAD2L2	3.03e-05	0.728	692	0.657044
ENSP00000235329	MFN2	1.64e-05	0.564	298	0.469948
ENSP00000235332	MIIP	9.96e-05	0.48	158	0.324827
ENSP00000235345	SLC35D1	1.75e-05	0.972	380	0.157165
ENSP00000235347	PRAMEF10	0.00133228	0.986	0	0.633743
ENSP00000235349	PRAMEF4	2.82e-05	0.496	0	0.587554
ENSP00000235372	PRDM2	5.12e-05	0.224	939	0.898553
ENSP00000235382	RGS2	2.57e-05	0.38	925	0.793209
ENSP00000235521	WARS2	1.67e-05	0.906	312	0.69509
ENSP00000235628	NT5C1A	2.11e-05	0.328	343	0.481124
ENSP00000235835	AKR7A2	1.88e-05	0.992	0	0.18095
ENSP00000235932	RAB7L1	1.7e-05	0.986	0	0
ENSP00000236137	SLC19A2	4.3e-05	0.978	787	0.220519
ENSP00000236147	SELL	2.19e-05	0.45	606	0.80037
ENSP00000236166	FMO6P	7.08e-05	0.11	316	0
ENSP00000236192	VAMP4	1.92e-05	0.786	224	0.293444
ENSP00000236273	SYF2	1.99e-05	0.902	228	0.209115
ENSP00000236495	SLC5A9	5.24e-05	0.218	218	0.182444
ENSP00000236671	CTSD	1.83e-05	0.43	956	0.785864
ENSP00000236709	A4GNT	2.68e-05	0.558	167	0.426324
ENSP00000236826	MMP8	3.56e-05	0.166	512	0.893803
ENSP00000236850	APOA1	1.96e-05	0.322	999	0.899561
ENSP00000236877	SLC8A2	6.45e-05	0.098	311	0.606831
ENSP00000236957	EEF1B2	1.37e-05	0.92	266	0.722773
ENSP00000236959	ATIC	1.23e-05	0.988	885	0.745206
ENSP00000236979	TNP1	7.49e-05	0.06	295	0.358066
ENSP00000236980	FASTKD2	4.29e-05	0.876	186	0.25956
ENSP00000237014	TTR	1.65e-05	0.684	766	0.857566
ENSP00000237172	FILIP1	9.97e-05	0.384	198	0.276914
ENSP00000237264	TBPL1	1.37e-05	0.938	988	0
ENSP00000237275	ZC2HC1B	2.14e-05	0.504	0	0.433849
ENSP00000237281	FBXO30	0.000195015	0.994	0	0.412034
ENSP00000237283	ADAT2	1.48e-05	0.98	343	0.51084
ENSP00000237289	TNFAIP3	1.68e-05	0.99	867	0.818945
ENSP00000237316	TCF21	4.22e-05	0.104	648	0.897006
ENSP00000237353	PMFBP1	8.04e-05	0.212	179	0.413129
ENSP00000237380	MED28	2.33e-05	0.988	325	0.801017
ENSP00000237449	DNAH6	4e-05	0.198	916	0.904733
ENSP00000237455	RNF103	1.64e-05	0.942	216	0.415542
ENSP00000237500	MYL12B	2.89e-05	0.194	802	0.829059
ENSP00000237527	GHRH	2.78e-05	0.16	900	0.642696
ENSP00000237536	SOGA1	6.85e-05	0.72	197	0.193702
ENSP00000237596	PKD2	6.97e-05	0.094	903	0.542196
ENSP00000237612	ABCG2	1.94e-05	0.476	615	0.807331
ENSP00000237642	FAM47E-STBD1	1.12e-05	0.814	0	0
ENSP00000237654	CCNI	2.45e-05	0.472	243	0.818716
ENSP00000237696	RARRES1	6.34e-05	0.36	150	0.38355
ENSP00000237822	C2orf43	2.38e-05	0.988	0	0
ENSP00000237837	FGF23	2.32e-05	0.276	893	0.894013
ENSP00000237853	ELL2	1.62e-05	0.984	191	0.751306
ENSP00000237889	NDUFB3	1.1e-05	0.99	0	0.240649
ENSP00000237937	ZFAND5	1.26e-05	1	0	0.196016
ENSP00000238018	GDA	1.97e-05	0.99	199	0.197357
ENSP00000238081	YWHAQ	1.55e-05	0.6	792	0.985911
ENSP00000238112	CPSF3	1.43e-05	0.908	377	0.568101
ENSP00000238146	DDX55	1.12e-05	0.97	183	0.608578
ENSP00000238156	CCDC92	6.87e-05	0.99	0	0.382168
ENSP00000238256	FKBP15	3.61e-05	0.824	204	0.469275
ENSP00000238341	CNTRL	9.63e-05	0.232	900	0.550263
ENSP00000238379	HDHD3	4.12e-05	0.742	222	0.249636
ENSP00000238497	VPS4B	1.98e-05	0.996	571	0.229129
ENSP00000238508	SERPINB10	1.05e-05	0.754	191	0.287843
ENSP00000238558	GSC	2.93e-05	0.378	232	0.930812
ENSP00000238561	ADCK1	1.27e-05	0.762	183	0.169965
ENSP00000238616	NEK9	1.93e-05	0.81	697	0.376315
ENSP00000238618	ACYP1	2.84e-05	0.98	0	0.236702
ENSP00000238628	IFT43	4.78e-05	0.594	570	0.809037
ENSP00000238647	IRF2BPL	4.62e-05	0.986	0	0.358952
ENSP00000238667	FLVCR2	6.53e-05	0.136	201	0.189425
ENSP00000238682	TGFB3	2.92e-05	0.45	460	0.969767
ENSP00000238714	PAPOLG	1.7e-05	0.902	182	0.551119
ENSP00000238738	RHOQ	1.46e-05	0.574	577	0.909855
ENSP00000238788	TMEM214	1.37e-05	0.99	284	0.198307
ENSP00000238823	FAM98A	2.62e-05	0.992	0	0.293211
ENSP00000238831	YIPF4	2.46e-05	0.994	0	0.354138
ENSP00000238855	AFTPH	2.72e-05	0.986	0	0.236794
ENSP00000238875	LGALSL	5.71e-05	0.988	161	0.314628
ENSP00000238892	CRIPT	3.94e-05	0.98	390	0.252701
ENSP00000238936	TMEM180	8.17e-05	0.986	0	0.403994
ENSP00000238994	PPP1R3C	2.59e-05	0.974	198	0.262715
ENSP00000239027	HELLS	1.29e-05	0.89	484	0.919618
ENSP00000239125	C10orf95	6.27e-05	0.356	158	0
ENSP00000239144	HOXB8	3.06e-05	0.198	615	0.958878
ENSP00000239151	HOXB5	3.39e-05	0.392	750	0.961338
ENSP00000239165	HOXB7	2.61e-05	0.216	712	0.968566
ENSP00000239223	DUSP1	1.58e-05	0.91	989	0.925267
ENSP00000239231	PANK3	5.97e-05	0.998	187	0.20504
ENSP00000239243	MSX2	2.19e-05	0.588	597	0.959261
ENSP00000239316	INSL4	3.68e-05	0.43	212	0.201735
ENSP00000239347	IFNA7	7e-05	0.232	167	0.293177
ENSP00000239367	LRP11	0.000285132	0.376	507	0.316825
ENSP00000239374	CCDC170	4.52e-05	0.138	313	0.29096
ENSP00000239440	ARAP3	2.63e-05	0.586	234	0.466366
ENSP00000239444	PCDHB8	4.69e-05	0.234	0	0.749906
ENSP00000239446	PCDHB10	6.09e-05	0.98	0	0.623049
ENSP00000239449	PCDHB14	0.000275376	0.246	406	0.630961
ENSP00000239450	PCDHB12	1.67e-05	0.546	0	0.626892
ENSP00000239451	SLC25A2	0.000117336	0.074	241	0.314957
ENSP00000239461	PRRX1	2.83e-05	0.23	501	0.952921
ENSP00000239587	TTLL2	5.62e-05	0.13	299	0.327552
ENSP00000239614	MSANTD2	5.97e-05	0.392	208	0.418622
ENSP00000239666	PDZD11	3.61e-05	0.99	0	0.243372
ENSP00000239690	NUDCD1	1.9e-05	0.992	0	0.237324
ENSP00000239730	-	7.57e-05	0.162	509	0
ENSP00000239761	MRC1	1.69e-05	0.634	538	0
ENSP00000239830	CCDC77	3.66e-05	0.988	0	0.448786
ENSP00000239849	TNFSF11	1.69e-05	0.578	227	0.885606
ENSP00000239878	UFM1	3.99e-05	0.996	181	0.220482
ENSP00000239882	ELF1	3.75e-05	0.868	689	0.886534
ENSP00000239891	ALG5	1.61e-05	0.874	212	0.325729
ENSP00000239906	FAM53C	1.42e-05	0.778	0	0.505239
ENSP00000239926	MYOT	0.000108995	0.114	562	0.515713
ENSP00000239938	EGR1	1.36e-05	0.79	997	0.980928
ENSP00000239940	PFN2	2.09e-05	0.444	414	0.708372
ENSP00000239944	SERP1	1.11e-05	0.984	0	0.144494
ENSP00000240050	MTERFD3	1.68e-05	0.94	0	0
ENSP00000240055	NFYB	1.75e-05	0.36	993	0
ENSP00000240079	CCDC53	2.52e-05	0.584	215	0.244044
ENSP00000240093	FZD3	6.56e-05	0.038	606	0.850229
ENSP00000240100	DUSP4	1.78e-05	0.586	859	0.851374
ENSP00000240123	SORBS3	2.32e-05	0.548	161	0.390958
ENSP00000240139	PPP3CC	1.82e-05	0.214	817	0.964668
ENSP00000240185	TARDBP	1.57e-05	0.982	304	0.596594
ENSP00000240189	PRAMEF2	0.00413199	0.986	0	0.612363
ENSP00000240285	RDH10	1.64e-05	0.992	194	0.225487
ENSP00000240304	LUC7L3	1.06e-05	0.992	0	0.385075
ENSP00000240306	DLX4	2.33e-05	0.514	370	0.942489
ENSP00000240316	COIL	2.19e-05	0.964	240	0.690626
ENSP00000240327	SPOP	2.38e-05	0.718	910	0.785859
ENSP00000240328	TBX2	2.58e-05	0.234	349	0.961905
ENSP00000240335	TBX4	1.89e-05	0.544	295	0.964578
ENSP00000240343	DYNLL2	4.2e-05	0.204	929	0
ENSP00000240361	TEX14	3.15e-05	0.24	214	0.296942
ENSP00000240423	NCAPH	1.6e-05	0.872	529	0.74901
ENSP00000240488	MND1	3.27e-05	0.528	900	0.394713
ENSP00000240499	ZNF141	2.29e-05	0.496	286	0.969196
ENSP00000240615	TAS2R8	1e-05	0.738	0	0.413397
ENSP00000240617	PLBD1	9.81e-05	0.724	544	0.350069
ENSP00000240618	KLRK1	1.25e-05	0.63	290	0
ENSP00000240651	PYROXD1	5.13e-05	0.988	0	0.295922
ENSP00000240652	IAPP	1.56e-05	0.736	900	0.617189
ENSP00000240662	KCNJ8	2.79e-05	0.39	359	0.591872
ENSP00000240687	TAS2R7	7.31e-05	0.29	0	0.630679
ENSP00000240691	TAS2R9	2.45e-05	0.688	0	0.442828
ENSP00000240731	ZNF211	2.38e-05	0.492	329	0.991375
ENSP00000240851	TFG	3.84e-05	0.506	302	0.750905
ENSP00000240874	KALRN	2.25e-05	0.218	902	0.722213
ENSP00000240922	NAA50	1.37e-05	0.878	284	0.48371
ENSP00000240986	GJA8	0.000118612	0.048	242	0
ENSP00000241014	MAPK8IP1	3.27e-05	0.244	927	0.796254
ENSP00000241051	DEPDC7	2.3e-05	0.99	0	0.299006
ENSP00000241052	CAT	1.05e-05	0.856	928	0.931559
ENSP00000241124	GJB6	2.72e-05	0.19	406	0.549585
ENSP00000241125	GJA3	2.78e-05	0.856	165	0.235514
ENSP00000241256	GHSR	1.45e-05	0.77	904	0.773218
ENSP00000241261	TNFSF10	1.16e-05	0.872	659	0.875492
ENSP00000241274	SLITRK3	3.6e-05	0.438	175	0.335605
ENSP00000241305	CPXM2	1.91e-05	0.622	171	0.231727
ENSP00000241337	GSTM2	4.72e-05	0.578	802	0.352481
ENSP00000241416	ACVR2A	2.42e-05	0.81	226	0.926935
ENSP00000241436	POLK	1.64e-05	0.84	377	0.581883
ENSP00000241453	FLT3	1.36e-05	0.578	737	0.983667
ENSP00000241463	RASL11A	1.64e-05	0.568	548	0.938004
ENSP00000241502	FYTTD1	2.54e-05	0.996	0	0.318932
ENSP00000241527	MTERFD2	6.54e-05	0.824	151	0
ENSP00000241651	MYOG	4.24e-05	0.114	878	0.960398
ENSP00000241808	PRM2	2.6e-05	0.354	325	0.344112
ENSP00000242057	AHR	2.05e-05	0.942	562	0.924299
ENSP00000242067	BBS9	4.82e-05	0.204	323	0.353786
ENSP00000242104	OCM	2.06e-05	0.172	580	0
ENSP00000242108	EEPD1	4.03e-05	0.746	347	0.219614
ENSP00000242109	KIAA0087	2.14e-05	0.456	0	0
ENSP00000242152	NPY	1.56e-05	0.54	983	0.786004
ENSP00000242159	HOXA7	3.83e-05	0.234	833	0.96332
ENSP00000242208	INHBA	3.43e-05	0.108	363	0.95672
ENSP00000242209	FKBP9	1.67e-05	0.934	236	0.418626
ENSP00000242210	NT5C3A	3.4e-05	0.784	569	0.248384
ENSP00000242248	POLM	1.08e-05	0.85	198	0.439559
ENSP00000242249	RAMP3	1e-05	0.768	0	0.229705
ENSP00000242261	TWIST1	1.84e-05	0.796	981	0.981779
ENSP00000242285	CLTA	1.36e-05	0.978	930	0.244956
ENSP00000242315	KIAA1045	1.04e-05	0.798	0	0
ENSP00000242317	DNAI1	4.8e-05	0.064	894	0.549934
ENSP00000242338	CNTFR	1.07e-05	0.836	171	0.68625
ENSP00000242351	ZC3HAV1	4.51e-05	0.988	167	0.323908
ENSP00000242462	NEUROG3	2.32e-05	0.406	319	0.921967
ENSP00000242465	SRGN	2.76e-05	0.428	742	0.432062
ENSP00000242480	EGR2	1.28e-05	0.78	429	0.967145
ENSP00000242505	FAM149B1	1.39e-05	0.894	0	0.381476
ENSP00000242576	UNG	1.62e-05	0.74	472	0.685572
ENSP00000242577	DYNLL1	3.51e-05	0.188	974	0.572647
ENSP00000242591	IFT81	2.78e-05	0.984	0	0.328423
ENSP00000242607	HVCN1	2.5e-05	0.966	246	0.186824
ENSP00000242728	BHLHE41	1.62e-05	0.754	291	0.909667
ENSP00000242729	SSPN	0.000113011	0.038	979	0.277897
ENSP00000242784	C19orf43	9.61e-05	0.99	0	0.503744
ENSP00000242786	CD97	2.36e-05	0.794	269	0
ENSP00000242796	WDR83	2.23e-05	0.986	499	0
ENSP00000242804	ZNF442	3.14e-05	0.248	286	0.992284
ENSP00000242810	KLHL24	5.06e-05	0.996	191	0.278953
ENSP00000242839	ATP7B	1.63e-05	0.986	422	0.472712
ENSP00000242872	CENPK	2.04e-05	0.952	900	0.661134
ENSP00000243045	ORMDL2	2.48e-05	0.992	0	0.229275
ENSP00000243052	PDE1B	4.87e-05	0.2	942	0.274493
ENSP00000243056	HOXC13	2.99e-05	0.466	694	0.915422
ENSP00000243077	LRP1	3.73e-05	0.198	952	0.809385
ENSP00000243103	HOXC12	6.73e-05	0.048	694	0.857737
ENSP00000243108	HOXC6	5.45e-05	0.216	300	0.96533
ENSP00000243167	FAAH	2.41e-05	0.232	524	0.252994
ENSP00000243213	IL13RA2	2.93e-05	0.582	0	0.356537
ENSP00000243222	COL10A1	6.65e-05	0.076	918	0.696174
ENSP00000243298	RAB9B	1.17e-05	0.936	167	0.208144
ENSP00000243314	MAGEA9B	1.81e-05	0.522	0	0
ENSP00000243326	RIF1	3.03e-05	0.908	262	0.525201
ENSP00000243344	TTC21B	7.96e-05	0.312	241	0.442071
ENSP00000243346	NMI	2.34e-05	0.994	0	0.506139
ENSP00000243347	TNFAIP6	3.5e-05	0.164	315	0.800859
ENSP00000243349	ACVR1C	1.9e-05	0.588	428	0.901162
ENSP00000243389	SLC36A1	1.95e-05	0.882	252	0.165377
ENSP00000243440	BATF3	1.65e-05	0.478	242	0
ENSP00000243457	KCNJ2	4.39e-05	0.074	706	0.751178
ENSP00000243563	SNRPA	2.47e-05	0.454	473	0.785553
ENSP00000243578	B9D2	5.55e-05	0.154	900	0.528428
ENSP00000243611	C4BPB	3.12e-05	0.902	201	0.128416
ENSP00000243643	ZNF415	5.71e-05	0.106	286	0.989572
ENSP00000243644	ZNF350	1.92e-05	0.77	290	0.973129
ENSP00000243662	RAB38	4.19e-05	0.42	241	0.344623
ENSP00000243706	HAUS3	7.49e-05	0.416	360	0.170276
ENSP00000243776	CHPF	2.71e-05	0.796	922	0.228019
ENSP00000243786	INHA	3.12e-05	0.142	329	0.942436
ENSP00000243896	SLC35C2	3.5e-05	0.838	297	0.313285
ENSP00000243903	ACTR5	2.12e-05	0.934	645	0.359039
ENSP00000243911	MC3R	2.67e-05	0.402	903	0.568861
ENSP00000243914	CTCFL	2.21e-05	0.368	364	0.970924
ENSP00000243918	SYS1	3.23e-05	0.948	160	0.246212
ENSP00000243924	PI3	1.36e-05	0.446	472	0.845516
ENSP00000244007	PLCG1	3.37e-05	0.206	999	0.818396
ENSP00000244040	RAB22A	1.53e-05	0.996	346	0.302278
ENSP00000244043	PTGIS	1.07e-05	0.984	197	0.359712
ENSP00000244050	SNAI1	2.1e-05	0.476	961	0.986808
ENSP00000244061	RNF114	5.13e-05	0.634	421	0.233062
ENSP00000244096	MAGEA10	6.7e-05	0.566	284	0.605345
ENSP00000244137	PEPD	1.37e-05	0.75	440	0.716739
ENSP00000244174	IL9R	1.62e-05	0.646	359	0.415124
ENSP00000244217	MCEE	1.04e-05	0.994	0	0.175882
ENSP00000244221	PAIP2B	2.01e-05	0.942	165	0.276578
ENSP00000244227	SNRNP27	7.79e-05	0.66	180	0.216447
ENSP00000244241	IL17C	1.07e-05	0.794	0	0.436408
ENSP00000244289	LIPE	3.01e-05	0.396	354	0.307723
ENSP00000244314	IRGC	2.86e-05	0.56	153	0.229422
ENSP00000244336	CEACAM8	2.48e-05	0.458	284	0.45726
ENSP00000244360	RNF39	1.38e-05	0.988	0	0.232269
ENSP00000244364	DST	2.3e-05	0.51	286	0.611279
ENSP00000244426	FBXO9	1.11e-05	0.998	0	0.204386
ENSP00000244458	PACSIN1	4.05e-05	0.198	789	0.583165
ENSP00000244513	BTN1A1	2.34e-05	0.4	263	0.524091
ENSP00000244519	BTN3A3	2.71e-05	0.99	0	0.28913
ENSP00000244527	SLC17A1	2.59e-05	0.476	187	0.232646
ENSP00000244534	HIST1H1D	2.57e-05	0.9	154	0.811475
ENSP00000244537	HIST1H4G	1.48e-05	0.922	526	0
ENSP00000244565	UNC5CL	4.95e-05	0.34	159	0.305538
ENSP00000244571	AARS2	1.2e-05	0.95	576	0.721277
ENSP00000244573	HIST1H1A	2.99e-05	0.768	439	0.814985
ENSP00000244576	ZNF391	2.17e-05	0.928	286	0.992417
ENSP00000244601	HIST1H2BG	1.45e-05	0.846	685	0
ENSP00000244625	TBCC	5.46e-05	0.26	270	0
ENSP00000244661	HIST1H3B	1.18e-05	0.974	526	0
ENSP00000244669	APOBEC2	2.56e-05	0.454	408	0.139233
ENSP00000244709	TREM1	0.000112919	0.384	478	0.543399
ENSP00000244711	MEA1	2.52e-05	0.778	748	0.331174
ENSP00000244728	COL21A1	9.36e-05	0.06	916	0.409044
ENSP00000244741	CDKN1A	1.34e-05	0.836	999	0
ENSP00000244745	SOX4	3.16e-05	0.906	938	0.946416
ENSP00000244751	CPNE5	5.4e-05	0.396	426	0.315444
ENSP00000244763	SSR1	1.7e-05	0.998	396	0.439481
ENSP00000244766	NRN1	2.69e-05	0.7	360	0.588261
ENSP00000244769	ATXN1	1.69e-05	0.944	614	0.792389
ENSP00000244869	EREG	1.83e-05	0.552	998	0.867996
ENSP00000244926	SCGB1D2	0.00017915	0.7	159	0.551268
ENSP00000244930	SCGB2A1	7.23e-05	0.478	407	0.35762
ENSP00000245046	EMC3	3.72e-05	0.64	581	0.148923
ENSP00000245105	SH3TC1	8.15e-05	0.104	245	0.279696
ENSP00000245121	KATNAL2	4.88e-05	0.068	330	0.303744
ENSP00000245157	BBS2	4.22e-05	0.25	501	0.661438
ENSP00000245185	MT2A	1.43e-05	0.994	246	0.298291
ENSP00000245206	GOT2	1.15e-05	0.974	646	0.515542
ENSP00000245222	SPHK2	2.15e-05	0.876	323	0.453522
ENSP00000245255	PIWIL1	1.49e-05	0.992	387	0.703014
ENSP00000245304	RAP2A	1.63e-05	0.46	701	0.944237
ENSP00000245312	SLC10A2	3.67e-05	0.534	329	0.351064
ENSP00000245323	EFNB2	3.76e-05	0.154	998	0.906578
ENSP00000245407	SLC22A5	2.86e-05	0.984	397	0.284269
ENSP00000245414	IRF1	1.2e-05	0.942	913	0.89934
ENSP00000245451	BMP4	3.38e-05	0.152	953	0
ENSP00000245457	PTGER2	2.73e-05	0.358	905	0.639617
ENSP00000245479	SOX9	1.53e-05	0.9	858	0.97372
ENSP00000245541	GGA3	1.95e-05	0.62	256	0
ENSP00000245543	ARMC7	0.000106261	0.13	288	0.388223
ENSP00000245544	NUP85	1.06e-05	0.984	900	0.47602
ENSP00000245552	NT5C	2.04e-05	0.5	311	0.57595
ENSP00000245564	MSTO1	4.43e-05	0.782	177	0.273074
ENSP00000245615	MBOAT7	6.88e-05	0.24	208	0.218909
ENSP00000245620	LILRB3	1.47e-05	0.572	0	0.683487
ENSP00000245663	ZBTB46	1.95e-05	0.962	286	0.986736
ENSP00000245680	SLC35F5	1.79e-05	0.978	277	0.238888
ENSP00000245787	INSIG2	1.58e-05	0.948	353	0.544924
ENSP00000245796	PSD4	1.22e-05	0.99	178	0.320104
ENSP00000245810	PSPN	3.26e-05	0.422	215	0.485583
ENSP00000245817	TNFSF9	8.65e-05	0.526	594	0.540876
ENSP00000245903	CD70	3.7e-05	0.986	200	0.640153
ENSP00000245907	C3	3.17e-05	0.184	900	0.678829
ENSP00000245908	SH2D3A	6.17e-05	0.908	752	0.439451
ENSP00000245919	FOSB	1.83e-05	0.692	459	0
ENSP00000245923	RTN2	2.44e-05	0.414	198	0.120465
ENSP00000245932	VASP	3.88e-05	0.302	701	0.825855
ENSP00000245934	SYMPK	1.3e-05	0.982	156	0.472068
ENSP00000245957	C20orf26	6.57e-05	0.116	170	0
ENSP00000245960	CDC25B	2.84e-05	0.798	832	0.827825
ENSP00000245983	GNRH2	2.47e-05	0.486	900	0.759697
ENSP00000246000	-	1.36e-05	0.952	0	0
ENSP00000246006	CD93	3.04e-05	0.292	191	0.501589
ENSP00000246012	CST8	1.53e-05	0.558	440	0.643442
ENSP00000246020	CSTL1	2.89e-05	0.674	0	0.29317
ENSP00000246024	TMX4	2e-05	0.99	0	0.306279
ENSP00000246041	AP5S1	1.45e-05	0.99	0	0.247244
ENSP00000246069	DSTN	2.3e-05	0.208	426	0.685653
ENSP00000246070	LAMP5	8.96e-05	0.15	198	0.439988
ENSP00000246071	SNRPB2	2.03e-05	0.702	407	0.52337
ENSP00000246080	TCF15	2.79e-05	0.31	286	0.857012
ENSP00000246081	OTOR	1.04e-05	0.848	0	0.25798
ENSP00000246104	SCRT2	2.16e-05	0.536	183	0.886662
ENSP00000246105	DEFB129	4.28e-05	0.404	330	0.45326
ENSP00000246112	TLE6	4.6e-05	0.124	566	0.931859
ENSP00000246115	S1PR4	1.56e-05	0.712	900	0.824297
ENSP00000246117	NCLN	1.53e-05	0.994	0	0.257854
ENSP00000246151	PITHD1	4.93e-05	0.996	0	0.314963
ENSP00000246166	FNTB	1.47e-05	0.982	815	0.286981
ENSP00000246174	ARMCX5	2.2e-05	0.986	0	0.453532
ENSP00000246186	MMP24	0.000115211	0.004	506	0.764919
ENSP00000246190	NECAB3	0.000106931	0.388	165	0.227144
ENSP00000246229	PLAGL2	2.1e-05	0.432	286	0.977633
ENSP00000246421	SLC35E2	2.22e-05	0.996	0	0.319769
ENSP00000246515	SLURP1	4.52e-05	0.114	370	0.236009
ENSP00000246529	LRFN3	2.95e-05	0.296	448	0.952152
ENSP00000246533	CAPNS1	2.7e-05	0.522	454	0.333188
ENSP00000246549	FFAR2	2.61e-05	0.46	910	0.722559
ENSP00000246551	HCST	3.81e-05	0.992	197	0.415945
ENSP00000246553	FFAR1	2.41e-05	0.55	902	0.753555
ENSP00000246554	COX6B1	1.33e-05	0.966	349	0.316499
ENSP00000246635	KRT13	5.11e-05	0.61	414	0.53773
ENSP00000246646	KRT38	6.27e-05	0.234	156	0.362958
ENSP00000246657	CCR7	1.52e-05	0.788	912	0.805626
ENSP00000246662	KRT9	7.54e-05	0.328	301	0.453491
ENSP00000246672	NR1D1	2.31e-05	0.918	163	0.858475
ENSP00000246747	ARL2	1.95e-05	0.99	0	0.285628
ENSP00000246785	BCL2L12	4.14e-05	0.944	859	0.199458
ENSP00000246792	RRAS	1.59e-05	0.376	990	0.952949
ENSP00000246794	PRRG2	3.71e-05	0.37	209	0.181112
ENSP00000246802	GLTSCR2	1.35e-05	0.936	282	0.571524
ENSP00000246841	FLRT1	1.92e-05	0.42	204	0.779217
ENSP00000246868	SBDS	1.55e-05	0.976	390	0.472066
ENSP00000246891	CSN1S1	2.17e-05	0.494	567	0.369609
ENSP00000246895	STATH	2.19e-05	0.29	493	0.575517
ENSP00000246912	MLX	1.77e-05	0.954	390	0.861723
ENSP00000246914	WNK4	2.36e-05	0.872	165	0.41279
ENSP00000246949	DNASE1	2.58e-05	0.266	359	0.811967
ENSP00000246957	TRAP1	1.46e-05	0.656	575	0.610027
ENSP00000247001	SUGP1	1.77e-05	0.964	216	0.509319
ENSP00000247005	GDF1	2.99e-05	0.818	234	0.944901
ENSP00000247020	SDF2	3.16e-05	0.356	163	0.266388
ENSP00000247026	NSRP1	3.08e-05	0.988	0	0.28413
ENSP00000247087	AHDC1	8.71e-05	0.992	0	0.320791
ENSP00000247138	SLC35A2	1.9e-05	0.562	608	0.156804
ENSP00000247153	CFP	1.12e-05	0.99	235	0.553937
ENSP00000247161	ELK1	6.36e-05	0.396	411	0.826687
ENSP00000247170	DAAM1	2.22e-05	0.284	327	0
ENSP00000247178	ATG14	4.6e-05	0.986	340	0.378024
ENSP00000247182	SIX1	5.21e-05	0.14	554	0.958372
ENSP00000247191	DLGAP5	3.2e-05	0.632	453	0.766209
ENSP00000247194	L3HYPDH	8.23e-05	0.282	152	0.323047
ENSP00000247219	TBPL2	1.68e-05	0.442	968	0
ENSP00000247225	SGPP1	2.44e-05	0.994	194	0.125313
ENSP00000247226	PLEKHG3	0.000111305	0.774	300	0.312229
ENSP00000247270	EVI2A	4.49e-05	0.858	661	0.273569
ENSP00000247271	OMG	2.56e-05	0.254	712	0.812485
ENSP00000247306	CTAG2	0.00893506	0.992	0	0.585232
ENSP00000247461	CANX	1.88e-05	0.672	978	0.635184
ENSP00000247470	PYCARD	3.27e-05	0.43	997	0.81759
ENSP00000247584	HIVEP3	1.83e-05	0.73	286	0.987771
ENSP00000247665	PHPT1	3.02e-05	0.886	211	0.206823
ENSP00000247668	TRAF2	1.7e-05	0.996	922	0.810114
ENSP00000247706	ABHD8	1.03e-05	0.764	0	0.527811
ENSP00000247712	MPV17L2	5.22e-05	0.994	0	0
ENSP00000247829	TSPAN8	1.58e-05	0.618	201	0.535422
ENSP00000247843	YEATS4	1.27e-05	0.936	868	0.933015
ENSP00000247879	TAS2R3	2.62e-05	0.544	900	0.838586
ENSP00000247881	TAS2R4	2.27e-05	0.582	900	0.828397
ENSP00000247883	TAS2R5	2.49e-05	0.62	900	0.840509
ENSP00000247930	ZNF777	2.31e-05	0.502	286	0.990584
ENSP00000247933	IDUA	2.61e-05	0.558	300	0.150239
ENSP00000247956	ZNF317	1.79e-05	0.65	286	0.983142
ENSP00000247970	PIN1	1.39e-05	0.836	999	0.650051
ENSP00000247977	FBXL12	2.3e-05	0.982	0	0.210054
ENSP00000247986	KIF17	3.46e-05	0.282	703	0.661494
ENSP00000247992	PLA2G2C	2.93e-05	0.516	210	0.129921
ENSP00000248041	CYP4F11	2.44e-05	0.92	197	0.277857
ENSP00000248071	KLF2	1.75e-05	0.91	854	0.964838
ENSP00000248076	F2RL3	4.24e-05	0.236	900	0.727715
ENSP00000248098	HN1L	7.87e-05	0.99	0	0.481807
ENSP00000248114	GFER	2.25e-05	0.442	221	0.520448
ENSP00000248121	SYNGR3	9.43e-05	0.51	196	0.269194
ENSP00000248139	RAB40C	1.7e-05	0.744	499	0.464001
ENSP00000248150	GNG13	5.61e-05	0.084	900	0.613162
ENSP00000248211	ZNF10	2.1e-05	0.676	286	0.990778
ENSP00000248244	TICAM1	2.43e-05	0.956	999	0.766543
ENSP00000248248	MON1B	2.72e-05	0.602	659	0.175717
ENSP00000248272	GAN	8.83e-05	0.178	911	0
ENSP00000248342	EIF3K	1.54e-05	0.96	489	0.625087
ENSP00000248378	EMC6	1.76e-05	0.994	0	0.325539
ENSP00000248420	CACTIN	3.67e-05	0.534	181	0.369907
ENSP00000248437	TUBA4A	1.96e-05	0.52	900	0.723976
ENSP00000248444	VIL1	4.11e-05	0.06	468	0.772952
ENSP00000248450	AAMP	1.96e-05	0.842	263	0.413995
ENSP00000248553	HSPB1	1.92e-05	0.834	993	0.902422
ENSP00000248564	GNG11	4.12e-05	0.16	904	0.521642
ENSP00000248566	SHFM1	4.7e-05	0.228	232	0.688083
ENSP00000248572	GNGT1	1.23e-05	0.742	900	0
ENSP00000248594	PTPN12	2.53e-05	0.396	913	0.784223
ENSP00000248598	FGL2	4.1e-05	0.3	243	0.265362
ENSP00000248600	STYXL1	2.45e-05	0.28	273	0.74908
ENSP00000248643	MTERF	1.51e-05	0.774	161	0
ENSP00000248668	LRFN1	5.15e-05	0.094	448	0.937535
ENSP00000248673	ZFP36	1.45e-05	0.982	356	0
ENSP00000248701	SPINK2	1.01e-05	0.64	0	0.284483
ENSP00000248706	RASL11B	1.58e-05	0.4	590	0.94046
ENSP00000248846	TUBGCP6	2.37e-05	0.726	900	0.555745
ENSP00000248901	CYTH4	1.2e-05	0.966	207	0.318269
ENSP00000248923	GGT1	1.23e-05	0.886	700	0.836674
ENSP00000248929	SGSM3	3.6e-05	0.264	198	0.370825
ENSP00000248933	SEZ6L	7.61e-05	0.072	366	0.32673
ENSP00000248935	GSTT1	1.68e-05	0.612	582	0
ENSP00000248948	VPREB3	1.15e-05	0.604	0	0.24639
ENSP00000248958	SDF2L1	2.15e-05	0.992	0	0.291888
ENSP00000248975	YWHAH	1.52e-05	0.71	621	0.982702
ENSP00000248984	C22orf24	3.56e-05	0.572	0	0
ENSP00000248996	GNAZ	1.85e-05	0.676	938	0
ENSP00000249007	RFPL3	1.28e-05	0.992	0	0.367198
ENSP00000249014	CDC42EP1	0.000121913	0.994	0	0.372188
ENSP00000249016	MCHR1	1.86e-05	0.582	910	0.836236
ENSP00000249041	GALR3	1.99e-05	0.664	902	0.825687
ENSP00000249042	TST	1.88e-05	0.574	357	0.601432
ENSP00000249044	APOL5	1.35e-05	0.494	0	0.334476
ENSP00000249064	CCDC117	8.95e-05	0.932	430	0.405839
ENSP00000249066	APOL2	0.000102343	0.218	221	0.668395
ENSP00000249071	RAC2	1.66e-05	0.256	995	0.913836
ENSP00000249075	LIF	2.58e-05	0.47	916	0.772415
ENSP00000249079	C22orf23	1.19e-05	0.938	0	0.44923
ENSP00000249269	PMPCB	1.21e-05	0.936	198	0.452542
ENSP00000249284	TAS2R16	3.64e-05	0.54	900	0.830693
ENSP00000249344	STRIP2	2.11e-05	0.906	198	0.185774
ENSP00000249363	LRRC4	2.55e-05	0.28	450	0.931129
ENSP00000249373	SMO	3.85e-05	0.088	281	0.896465
ENSP00000249389	OPN1SW	1.95e-05	0.914	406	0.50989
ENSP00000249396	SIRT2	2.02e-05	0.82	934	0.893933
ENSP00000249440	HOXD3	2.54e-05	0.384	284	0.949386
ENSP00000249442	MTX2	1.91e-05	0.99	0	0.31086
ENSP00000249499	HOXD9	2.75e-05	0.308	694	0.957292
ENSP00000249501	HOXD10	3.23e-05	0.184	694	0.95177
ENSP00000249504	HOXD11	3.41e-05	0.108	694	0.963997
ENSP00000249598	GDF2	3.07e-05	0.3	234	0
ENSP00000249601	ARHGAP22	3.89e-05	0.292	202	0.432067
ENSP00000249647	SNAP23	1.86e-05	0.99	900	0.29907
ENSP00000249700	TMOD2	5.51e-05	0.838	165	0.22151
ENSP00000249749	DLL4	3.01e-05	0.932	971	0.928982
ENSP00000249750	ALDH1A2	2.7e-05	0.166	271	0.581815
ENSP00000249776	KNSTRN	2.41e-05	0.67	392	0.578314
ENSP00000249806	CLN6	1.98e-05	0.992	0	0.207166
ENSP00000249822	ARPP19	2.39e-05	0.986	0	0.249532
ENSP00000249842	ISLR	3.05e-05	0.214	448	0.939717
ENSP00000249861	THAP10	5.75e-05	0.986	0	0.397487
ENSP00000249883	AMOTL2	4.07e-05	0.804	171	0.18628
ENSP00000249910	MBD4	2.71e-05	0.87	281	0.812248
ENSP00000250003	MYOD1	1.64e-05	0.718	957	0
ENSP00000250018	TPH1	2.09e-05	0.594	439	0.627158
ENSP00000250024	E2F8	1.31e-05	0.89	857	0.646879
ENSP00000250056	FAM64A	3.09e-05	0.792	483	0.302598
ENSP00000250066	USP6	1.73e-05	0.684	199	0.393148
ENSP00000250076	ZNF232	1.91e-05	0.71	286	0.989551
ENSP00000250092	CD68	1.97e-05	0.318	581	0.834991
ENSP00000250101	TXNDC17	2.67e-05	0.986	0	0.187172
ENSP00000250111	ATP1B2	2.09e-05	0.918	151	0.364699
ENSP00000250113	FXR2	2.55e-05	0.974	709	0.525804
ENSP00000250124	MPDU1	2.61e-05	0.98	258	0.171392
ENSP00000250144	MMP28	8.18e-05	0.064	506	0
ENSP00000250151	CCL4	2.1e-05	0.624	607	0
ENSP00000250160	WISP1	6.02e-05	0.236	151	0.546886
ENSP00000250173	LRRC6	2.44e-05	0.408	563	0.739792
ENSP00000250244	AP1M2	1e-05	0.986	469	0.287473
ENSP00000250263	ERI1	1.18e-05	0.984	0	0.423822
ENSP00000250340	CLEC11A	8.81e-05	0.984	0	0.23073
ENSP00000250366	KLK9	3.45e-05	0.332	158	0
ENSP00000250378	CMA1	1.15e-05	0.8	362	0.700444
ENSP00000250405	BCL2L2	1.4e-05	0.988	830	0.703179
ENSP00000250416	PARP2	2.4e-05	0.682	623	0.747
ENSP00000250448	FOXA1	1.52e-05	0.874	915	0
ENSP00000250454	EAPP	5.84e-05	0.988	171	0.245491
ENSP00000250457	EGLN3	1.43e-05	0.906	329	0.774348
ENSP00000250498	DAD1	2.88e-05	0.72	186	0.301141
ENSP00000250535	CDO1	1.71e-05	0.952	193	0.145737
ENSP00000250559	RAP1B	1.55e-05	0.45	715	0.93837
ENSP00000250615	AANAT	3.38e-05	0.14	514	0.28392
ENSP00000250617	ARHGEF6	4.86e-05	0.252	904	0.523562
ENSP00000250699	CHRNA10	3.95e-05	0.432	391	0.29001
ENSP00000250825	VCY	0.000200629	0.348	0	0.68699
ENSP00000250838	CDY2A	1.36e-05	0.612	241	0
ENSP00000250894	MAPK8IP3	1.46e-05	0.676	909	0.418618
ENSP00000250896	MKNK2	4.62e-05	0.986	194	0.679585
ENSP00000250916	KLF16	2.24e-05	0.374	286	0.977803
ENSP00000250971	INS	1.23e-05	0.89	989	0
ENSP00000250974	ABHD17A	2.58e-05	0.99	0	0.18602
ENSP00000251038	ZC3H14	1.15e-05	0.976	359	0.546379
ENSP00000251047	LMAN1	2.96e-05	0.932	576	0.17889
ENSP00000251074	NUP37	2.69e-05	0.844	900	0.487839
ENSP00000251089	ANGEL1	5.94e-05	0.434	561	0.291875
ENSP00000251102	CNGB1	5.31e-05	0.12	667	0.607588
ENSP00000251108	CDADC1	1.02e-05	0.818	185	0.314462
ENSP00000251119	ZFYVE26	3.45e-05	0.732	179	0.196879
ENSP00000251166	CORO7	5.12e-05	0.992	0	0.309322
ENSP00000251203	PBX4	1.16e-05	0.876	282	0.932693
ENSP00000251241	DHX40	1.31e-05	0.922	700	0.592403
ENSP00000251250	DTWD1	0.000123321	0.986	0	0.555242
ENSP00000251269	ZNF221	2.45e-05	0.624	286	0.993705
ENSP00000251287	HCN2	8.27e-05	0.148	396	0.599481
ENSP00000251289	WDR18	4.98e-05	0.578	341	0.451175
ENSP00000251296	IGSF21	0.000350102	0.03	194	0.348788
ENSP00000251303	SLX1A	1.47e-05	0.738	288	0.33576
ENSP00000251312	DHRS11	1.13e-05	0.986	0	0
ENSP00000251337	GNAT2	1.97e-05	0.386	933	0.987355
ENSP00000251343	KHNYN	0.000162784	0.99	0	0.467938
ENSP00000251363	CERS4	1.73e-05	0.674	379	0.51164
ENSP00000251372	LILRA1	1.47e-05	0.57	0	0.686085
ENSP00000251377	LILRA2	1.47e-05	0.558	0	0.685987
ENSP00000251390	LILRA3	1.47e-05	0.566	0	0
ENSP00000251412	TUBG2	1.92e-05	0.296	911	0.700009
ENSP00000251413	TUBG1	2e-05	0.254	900	0.661141
ENSP00000251472	MAST1	3.86e-05	0.502	737	0.53652
ENSP00000251473	DKFZP761J1410	3.38e-05	0.4	301	0
ENSP00000251496	NCAPG	3.14e-05	0.508	502	0.697921
ENSP00000251507	RABGAP1L	2.31e-05	0.384	199	0.368197
ENSP00000251527	ESYT2	3.28e-05	0.85	197	0.310766
ENSP00000251535	ALOX12	4.88e-05	0.182	258	0.344832
ENSP00000251547	FBXO44	2.04e-05	0.952	152	0.170639
ENSP00000251582	ADAMTS2	5.97e-05	0.076	412	0.608493
ENSP00000251588	NARFL	3.78e-05	0.302	239	0.290931
ENSP00000251595	HBA2	2.23e-05	0.686	398	0.460439
ENSP00000251607	TRNT1	1.43e-05	0.964	235	0.650353
ENSP00000251630	PDGFRL	7.82e-05	0.044	436	0.990085
ENSP00000251642	DHX58	1.05e-05	0.876	515	0.651624
ENSP00000251643	KRT12	0.000105534	0.08	388	0.263622
ENSP00000251645	KRT31	2.31e-05	0.29	349	0.301368
ENSP00000251646	KRT33B	0.000131535	0.08	349	0.322694
ENSP00000251691	KIAA1244	8.92e-05	0.136	501	0
ENSP00000251757	PHC1	2.08e-05	0.99	169	0
ENSP00000251775	SNX4	2.94e-05	0.596	902	0.29966
ENSP00000251776	ROPN1B	3.64e-05	0.24	0	0.452558
ENSP00000251808	GRHL2	1.48e-05	0.71	623	0.770796
ENSP00000251809	SPAG1	1.92e-05	0.274	303	0.987285
ENSP00000251810	RRM2B	1.02e-05	0.95	999	0.714495
ENSP00000251849	RAF1	2e-05	0.444	999	0.88935
ENSP00000251864	TDRD1	2.15e-05	0.992	309	0.285301
ENSP00000251871	MED17	1.08e-05	0.988	642	0.86359
ENSP00000251900	SCML2	5.17e-05	0.4	499	0.915478
ENSP00000251921	NXPE1	1.06e-05	0.748	0	0.322286
ENSP00000251973	CARD10	2.36e-05	0.324	760	0.436856
ENSP00000251993	KIAA0930	1.24e-05	0.988	0	0.249493
ENSP00000252011	DHX35	1.08e-05	0.98	561	0.648379
ENSP00000252015	TRPC4AP	1.91e-05	0.906	343	0.339193
ENSP00000252029	TYMP	1.91e-05	0.992	581	0.588707
ENSP00000252032	C20orf194	1.16e-05	0.82	0	0.438533
ENSP00000252034	ELN	0.00018412	0.054	576	0.251137
ENSP00000252037	FKBP6	1.45e-05	0.612	178	0.597341
ENSP00000252050	CUL9	3.11e-05	0.982	999	0.244828
ENSP00000252071	ACTR3C	2.42e-05	0.156	400	0.97659
ENSP00000252085	PCDHGA12	9.09e-05	0.104	357	0.525941
ENSP00000252087	PCDHGC5	8.23e-05	0.128	303	0.438239
ENSP00000252115	POLDIP3	1.41e-05	0.93	173	0.588664
ENSP00000252137	DGCR14	2.85e-05	0.546	382	0.36524
ENSP00000252211	ZKSCAN3	1.69e-05	0.808	286	0.987024
ENSP00000252229	MICB	1.34e-05	0.544	0	0.406955
ENSP00000252242	KRT5	2.45e-05	0.454	798	0.826946
ENSP00000252244	KRT1	3.39e-05	0.362	777	0.740426
ENSP00000252245	KRT75	4.44e-05	0.562	288	0.284643
ENSP00000252250	KRT6C	4.35e-05	0.648	288	0.280434
ENSP00000252252	KRT6B	5.67e-05	0.236	303	0.337643
ENSP00000252318	GALNT8	9.8e-05	0.078	900	0.553723
ENSP00000252321	KCNA5	5.4e-05	0.07	450	0.727612
ENSP00000252329	PSMG3	3.51e-05	0.994	745	0.207404
ENSP00000252338	FAM155B	2.41e-05	0.17	600	0.571385
ENSP00000252445	ELOF1	1.95e-05	0.984	0	0.392074
ENSP00000252453	C19orf80	1.11e-05	0.662	0	0.325186
ENSP00000252455	PRKCSH	7.59e-05	0.196	503	0
ENSP00000252456	CNN1	4.05e-05	0.208	560	0.63582
ENSP00000252463	ZSCAN10	2.02e-05	0.696	286	0.988145
ENSP00000252482	EXOC3L2	5.54e-05	0.06	361	0.324874
ENSP00000252483	PVRL2	1.91e-05	0.994	0	0.186301
ENSP00000252486	APOE	1.68e-05	0.654	997	0.876648
ENSP00000252487	TOMM40	1.79e-05	0.754	800	0.397484
ENSP00000252491	APOC1	1.9e-05	0.648	588	0
ENSP00000252505	ALLC	2.83e-05	0.148	371	0.521759
ENSP00000252506	GADD45G	4.53e-05	0.114	358	0.738668
ENSP00000252512	XPO7	6.84e-05	0.562	325	0.252268
ENSP00000252519	ACE2	2.21e-05	0.446	359	0.550197
ENSP00000252530	FAM98C	1.2e-05	0.996	0	0.302507
ENSP00000252542	SAFB2	1.25e-05	0.994	575	0.471263
ENSP00000252575	NCAN	5.2e-05	0.074	923	0.571824
ENSP00000252590	PLVAP	3.13e-05	0.402	222	0.216341
ENSP00000252593	BST2	2.75e-05	0.84	227	0.534488
ENSP00000252595	SLC27A1	1e-05	0.99	384	0.460607
ENSP00000252597	USHBP1	1.07e-05	0.644	0	0.390657
ENSP00000252599	COLGALT1	0.000169232	0.986	353	0.294717
ENSP00000252603	PGLS	1.1e-05	0.982	472	0.472245
ENSP00000252622	LSM7	1.35e-05	0.978	331	0.530229
ENSP00000252655	RSPH3	8.08e-05	0.776	173	0.329356
ENSP00000252660	MAS1	2.47e-05	0.578	292	0.32974
ENSP00000252669	ACSBG2	2.47e-05	0.712	194	0
ENSP00000252674	MLLT1	1.77e-05	0.462	868	0.910778
ENSP00000252677	BMP15	2.28e-05	0.418	269	0.922594
ENSP00000252699	ACTN4	2.85e-05	0.55	777	0.745889
ENSP00000252711	NDUFA10	3.49e-05	0.562	194	0.235316
ENSP00000252723	EPO	2.08e-05	0.97	457	0.847145
ENSP00000252725	ARPC1B	2.72e-05	0.798	191	0.390067
ENSP00000252729	CACNG6	3.24e-05	0.384	720	0.314289
ENSP00000252744	ZSWIM6	1.98e-05	0.718	358	0.330823
ENSP00000252771	FCHO1	5.5e-05	0.138	708	0.44225
ENSP00000252785	SCO2	1.43e-05	0.968	891	0.454385
ENSP00000252797	ZNF764	2.06e-05	0.946	286	0.987547
ENSP00000252799	ZNF747	2.26e-05	0.964	286	0.992751
ENSP00000252804	PXDN	3.29e-05	0.324	370	0.753417
ENSP00000252809	GDF15	2.29e-05	0.892	990	0.964916
ENSP00000252818	JUND	1.89e-05	0.444	811	0
ENSP00000252825	HRC	4.01e-05	0.3	325	0.402919
ENSP00000252826	TRPM4	8.45e-05	0.13	799	0.569
ENSP00000252840	ZNF557	2.05e-05	0.666	286	0.993664
ENSP00000252854	OLFM1	4.17e-05	0.216	360	0.251173
ENSP00000252891	NUMBL	4.49e-05	0.068	885	0.816467
ENSP00000252898	TNNI2	3.01e-05	0.226	923	0.53143
ENSP00000252934	ATXN10	8.96e-05	0.262	525	0.368904
ENSP00000252936	TUBGCP2	3.3e-05	0.414	900	0.549706
ENSP00000252939	CALY	1.21e-05	0.568	0	0.286992
ENSP00000252945	CYP2E1	2.14e-05	0.658	731	0.641721
ENSP00000252951	HBZ	1.07e-05	0.99	300	0.560705
ENSP00000252971	MNX1	1.99e-05	0.55	505	0.971292
ENSP00000252979	ZNF337	1.73e-05	0.716	286	0.991922
ENSP00000252992	CEP85	3.04e-05	0.996	0	0.359088
ENSP00000252996	TAF4	3.02e-05	0.872	999	0.883062
ENSP00000252997	GATA5	1.67e-05	0.376	541	0
ENSP00000252999	LAMA5	9.46e-05	0.114	920	0.734686
ENSP00000253003	ADRM1	2.09e-05	0.85	275	0.336064
ENSP00000253008	PRDM12	0.000196562	0.032	263	0.606484
ENSP00000253023	UBE2M	1.28e-05	0.996	639	0.353885
ENSP00000253024	TRIM28	1.72e-05	0.964	989	0.91077
ENSP00000253031	YIPF2	1.98e-05	0.996	0	0.243443
ENSP00000253039	EIF2S3	1.63e-05	0.988	536	0.716408
ENSP00000253047	TMEM160	9.9e-05	0.496	740	0.343167
ENSP00000253048	ZC3H4	4.7e-05	0.756	164	0.35958
ENSP00000253055	MAP3K10	1.39e-05	0.648	570	0.991303
ENSP00000253063	SESN2	2.61e-05	0.892	897	0.678423
ENSP00000253083	HIP1R	1.76e-05	0.882	359	0.347993
ENSP00000253109	ANGPTL6	5.05e-05	0.366	233	0.402582
ENSP00000253115	ZNF426	1.63e-05	0.978	286	0.988257
ENSP00000253122	SLC6A8	1.9e-05	0.538	313	0.291907
ENSP00000253144	ZNF331	2.02e-05	0.478	286	0.981997
ENSP00000253159	ZNF236	2.19e-05	0.408	286	0.988818
ENSP00000253188	SLC7A10	2.72e-05	0.71	247	0.270661
ENSP00000253193	LRP3	0.000143876	0.054	282	0.36836
ENSP00000253255	PKDREJ	9.2e-05	0.04	439	0.451297
ENSP00000253262	NUTMF	1.02e-05	0.982	0	0
ENSP00000253303	RGN	1.7e-05	0.674	300	0.470702
ENSP00000253329	PPIL4	1.13e-05	0.96	436	0.553137
ENSP00000253332	AKAP12	5.99e-05	0.226	540	0.598792
ENSP00000253339	LATS1	1.69e-05	0.374	667	0.989778
ENSP00000253354	BPIFB1	6.78e-05	0.114	200	0.31237
ENSP00000253363	RBM39	1.68e-05	0.988	400	0.558195
ENSP00000253392	EDA2R	6.31e-05	0.116	832	0.832825
ENSP00000253401	ARHGEF9	3.36e-05	0.372	239	0.299031
ENSP00000253407	C1QL1	7.13e-05	0.994	0	0.457486
ENSP00000253408	GFAP	2.45e-05	0.594	511	0.904736
ENSP00000253410	HIGD1B	0.000181832	0.052	304	0.253133
ENSP00000253452	COX4I1	1.34e-05	0.948	474	0.496564
ENSP00000253457	EMC8	2.49e-05	0.984	0	0.302641
ENSP00000253458	GSE1	3.64e-05	0.994	230	0.285448
ENSP00000253461	C16orf95	2.19e-05	0.42	0	0.394926
ENSP00000253496	F12	1.79e-05	0.774	441	0.492826
ENSP00000253577	ABCB7	1.76e-05	0.958	184	0.293195
ENSP00000253669	HAUS8	5.11e-05	0.996	0	0.37505
ENSP00000253673	EMR3	4e-05	0.174	225	0
ENSP00000253686	MRPS25	2.29e-05	0.94	218	0.30527
ENSP00000253693	CAPN7	1.92e-05	0.576	569	0
ENSP00000253719	NAPSA	3.3e-05	0.53	153	0.119739
ENSP00000253727	NR1H2	2.57e-05	0.276	803	0.838317
ENSP00000253754	PDLIM4	1.97e-05	0.524	397	0.622506
ENSP00000253778	GFPT2	1.75e-05	0.766	674	0.653229
ENSP00000253788	RPL27	1.06e-05	0.974	234	0.717506
ENSP00000253794	VPS25	1.97e-05	0.99	242	0.348143
ENSP00000253796	RAMP2	1.08e-05	0.676	0	0.220662
ENSP00000253799	AOC2	1.97e-05	0.368	392	0.672459
ENSP00000253801	G6PC	2.59e-05	0.516	223	0.32842
ENSP00000253807	PCDHAC1	1.95e-05	0.41	0	0.525247
ENSP00000253812	PCDHGA3	3.86e-05	0.452	150	0.580899
ENSP00000253814	NDFIP1	1.95e-05	0.964	574	0.166973
ENSP00000253856	ATP6V0A4	1.72e-05	0.82	452	0.298755
ENSP00000253861	EXOC4	4.57e-05	0.128	953	0.458266
ENSP00000253925	PPFIA1	3.28e-05	0.338	974	0.427251
ENSP00000253934	TMEM204	9.27e-05	0.162	216	0.447393
ENSP00000253968	BARX1	2.86e-05	0.944	150	0.863841
ENSP00000254029	WDR44	4.77e-05	0.986	218	0.14783
ENSP00000254035	CKMT2	2.07e-05	0.858	349	0.25609
ENSP00000254043	KRT15	2.57e-05	0.798	293	0.52792
ENSP00000254051	TNS4	0.000151116	0.44	821	0.281585
ENSP00000254066	RARA	1.68e-05	0.662	580	0.95933
ENSP00000254079	PPP1R1B	5.65e-05	0.142	878	0.740811
ENSP00000254090	FMO5	2.21e-05	0.564	179	0.168195
ENSP00000254101	PRKAB2	2.05e-05	0.288	500	0
ENSP00000254108	FUS	1.41e-05	0.922	472	0.876258
ENSP00000254122	FSHB	2.27e-05	0.502	198	0.885338
ENSP00000254166	ZNF132	1.82e-05	0.688	286	0.985685
ENSP00000254181	USP29	1.28e-05	0.972	604	0.254383
ENSP00000254190	CHSY1	3.15e-05	0.976	913	0.207481
ENSP00000254193	SNRPA1	1.15e-05	0.94	204	0.616592
ENSP00000254227	NR0B2	2.61e-05	0.32	966	0.888121
ENSP00000254235	ADCY7	1.41e-05	0.64	919	0.99762
ENSP00000254250	THAP1	1.82e-05	0.664	242	0.408154
ENSP00000254260	RHPN2	1.85e-05	0.51	488	0
ENSP00000254286	ACTR10	1.64e-05	0.296	641	0.961379
ENSP00000254301	LGALS3	2.81e-05	0.212	913	0.8754
ENSP00000254321	ZNF700	1.85e-05	0.706	286	0.991485
ENSP00000254322	DNAJB1	1.46e-05	0.966	734	0.773375
ENSP00000254325	RFX1	2.26e-05	0.26	474	0.898732
ENSP00000254337	DCAF15	8.33e-05	0.282	158	0.548719
ENSP00000254351	SDC1	3.32e-05	0.17	951	0.905858
ENSP00000254442	WDR7	2.7e-05	0.444	575	0.158693
ENSP00000254457	LHX1	2.23e-05	0.318	373	0
ENSP00000254466	GAS2L2	2.45e-05	0.47	244	0
ENSP00000254480	SMARCC1	1.34e-05	0.986	920	0.927913
ENSP00000254488	SLC6A11	3.38e-05	0.218	418	0.222356
ENSP00000254508	NUP210	3.03e-05	0.858	211	0.421218
ENSP00000254528	EMILIN2	6.37e-05	0.302	165	0.525231
ENSP00000254579	DNHD1	7.37e-05	0.222	360	0.821027
ENSP00000254584	ARFIP2	2.12e-05	0.854	418	0.42815
ENSP00000254605	RRP8	1.18e-05	0.792	382	0.567066
ENSP00000254624	EFR3A	6.52e-05	0.996	0	0.446052
ENSP00000254630	PTCD3	1.12e-05	0.988	175	0.37511
ENSP00000254654	ILKAP	2.43e-05	0.328	660	0.674189
ENSP00000254657	PER2	2.8e-05	0.938	915	0.897727
ENSP00000254661	RAMP1	6.52e-05	0.31	198	0.383191
ENSP00000254667	PTPRE	3.61e-05	0.3	578	0.788668
ENSP00000254691	CARD6	0.000105672	0.99	0	0.262952
ENSP00000254695	RAP1GAP2	2.12e-05	0.896	163	0.195453
ENSP00000254722	SERPINF1	3.29e-05	0.764	866	0.8409
ENSP00000254730	EEFSEC	1.25e-05	0.992	0	0.453951
ENSP00000254742	TMEM128	0.000182265	0.678	345	0.345075
ENSP00000254765	POPDC3	2.82e-05	0.522	254	0.373271
ENSP00000254770	LANCL2	4.29e-05	0.962	368	0.249637
ENSP00000254799	GRSF1	2.3e-05	0.996	0	0.318282
ENSP00000254801	IGJ	1.58e-05	0.978	234	0
ENSP00000254806	WBP2	5.14e-05	0.924	158	0.185862
ENSP00000254810	H3F3B	1.13e-05	0.942	526	0.936403
ENSP00000254816	TRIM47	4.92e-05	0.994	0	0.264904
ENSP00000254835	ANKRD20A3	2.81e-05	0.398	205	0
ENSP00000254846	KDM6B	1.31e-05	0.698	860	0
ENSP00000254854	GUCY2D	1.82e-05	0.284	757	0.984222
ENSP00000254868	CLEC10A	1.78e-05	0.556	329	0.486176
ENSP00000254878	HRSP12	1.54e-05	0.984	0	0.206183
ENSP00000254900	BRD8	4.94e-05	0.988	409	0.822573
ENSP00000254908	PCBD2	1.58e-05	0.704	156	0.164349
ENSP00000254928	ERAL1	1.1e-05	0.988	499	0.312758
ENSP00000254942	TERF2	2.04e-05	0.988	927	0.618625
ENSP00000254958	JAG1	2.36e-05	0.56	936	0.967286
ENSP00000254976	SNAP25	1.68e-05	0.986	226	0.262577
ENSP00000254998	NXT1	2.5e-05	0.994	0	0.428188
ENSP00000255006	RIN2	8.88e-05	0.99	575	0.2526
ENSP00000255008	SSTR4	2.88e-05	0.354	908	0.83232
ENSP00000255030	CRP	2.8e-05	0.472	487	0.196172
ENSP00000255039	HAPLN2	7.87e-05	0.104	400	0.278209
ENSP00000255040	APCS	4.59e-05	0.142	577	0.46956
ENSP00000255078	IGHMBP2	1.38e-05	0.704	372	0.625161
ENSP00000255087	MTL5	2.85e-05	0.362	286	0.528981
ENSP00000255108	DPH2	2.71e-05	0.748	481	0.41999
ENSP00000255120	NASP	1.43e-05	0.974	412	0.624227
ENSP00000255129	ZNF334	2e-05	0.652	286	0.991681
ENSP00000255174	C20orf111	7.84e-05	0.984	0	0
ENSP00000255175	SERINC3	2.75e-05	0.498	343	0.600252
ENSP00000255189	DMGDH	1.02e-05	0.924	530	0.559203
ENSP00000255192	BHMT2	1.57e-05	0.76	152	0.218598
ENSP00000255194	AP3B1	1.81e-05	0.706	378	0.210744
ENSP00000255198	ZBED3	4.3e-05	0.994	0	0.220674
ENSP00000255224	SYT4	3.13e-05	0.352	575	0.369395
ENSP00000255226	SLC14A2	1.9e-05	0.588	447	0.174881
ENSP00000255262	NMUR2	4.22e-05	0.07	904	0.834769
ENSP00000255266	PDE6A	2.19e-05	0.198	962	0.981646
ENSP00000255305	XPO4	5.17e-05	0.99	316	0.226596
ENSP00000255380	CHRM3	3.86e-05	0.094	934	0.808657
ENSP00000255381	MYH4	2.47e-05	0.274	723	0.957099
ENSP00000255389	PEMT	1.08e-05	0.992	802	0.316702
ENSP00000255390	SCO1	1.2e-05	0.97	197	0.28025
ENSP00000255409	CHI3L1	3.56e-05	0.122	865	0.660504
ENSP00000255416	MYBPH	7.58e-05	0.916	686	0.370094
ENSP00000255448	DCLK1	2.24e-05	0.172	663	0.985754
ENSP00000255465	CCNA1	1.69e-05	0.82	895	0.897564
ENSP00000255476	RFXAP	3.46e-05	0.372	197	0.651169
ENSP00000255499	RNF128	1.54e-05	0.99	709	0.790659
ENSP00000255608	BTBD2	3.06e-05	0.846	352	0.247203
ENSP00000255613	SUV420H2	4.69e-05	0.732	175	0.481571
ENSP00000255631	HSPBP1	1.1e-05	0.992	0	0.146747
ENSP00000255641	CSNK1G2	2.34e-05	0.646	900	0.43994
ENSP00000255674	RTTN	7.95e-05	0.692	159	0.35435
ENSP00000255681	MACROD1	2.42e-05	0.482	202	0.174204
ENSP00000255688	RARRES3	4e-05	0.984	345	0.640803
ENSP00000255746	ZNF679	2.38e-05	0.644	286	0.993309
ENSP00000255759	FOPNL	3.75e-05	0.982	0	0.297077
ENSP00000255764	MED10	1.31e-05	0.984	245	0.784277
ENSP00000255784	CCDC134	1.86e-05	0.992	0	0.262327
ENSP00000255858	SEC14L4	1.96e-05	0.994	386	0.165944
ENSP00000255945	GIMAP4	9.36e-05	0.396	505	0.39657
ENSP00000255977	MKRN1	3.95e-05	0.79	619	0.329451
ENSP00000255992	KRBA1	1.44e-05	0.74	0	0
ENSP00000256001	ACTR3B	2.25e-05	0.18	478	0.974715
ENSP00000256010	NTS	3.87e-05	0.098	927	0.839715
ENSP00000256015	BTG1	3.49e-05	0.996	0	0.522106
ENSP00000256031	ATP13A3	4.68e-05	0.354	707	0.311812
ENSP00000256079	IPO8	1.95e-05	0.394	293	0
ENSP00000256103	PMP2	5.75e-05	0.188	186	0.229588
ENSP00000256104	FABP4	2.03e-05	0.338	341	0.782621
ENSP00000256119	CA1	2.28e-05	0.21	284	0
ENSP00000256151	CCDC59	6.49e-05	0.884	173	0.348927
ENSP00000256178	LYVE1	1.97e-05	0.578	564	0.54248
ENSP00000256186	MICALCL	5.58e-05	0.99	0	0.338874
ENSP00000256190	SBF2	1.52e-05	0.972	229	0.138973
ENSP00000256194	MICAL2	3.45e-05	0.376	955	0.421917
ENSP00000256196	RRAS2	1.61e-05	0.386	860	0.954345
ENSP00000256255	TMEM66	3.26e-05	0.998	0	0
ENSP00000256257	RNF122	5.07e-05	0.918	240	0.418082
ENSP00000256261	DUSP26	2.53e-05	0.19	590	0.750592
ENSP00000256319	C14orf1	1.31e-05	0.996	0	0.158068
ENSP00000256339	UNC79	0.000102203	0.318	983	0.352189
ENSP00000256343	CATSPERB	7.04e-05	0.07	750	0.247821
ENSP00000256362	VRTN	1.14e-05	0.306	0	0.513139
ENSP00000256366	SYNJ2BP	9.28e-05	0.83	479	0.321831
ENSP00000256379	MED6	1.77e-05	0.942	171	0.859809
ENSP00000256383	EIF2S1	1.43e-05	0.992	331	0.673015
ENSP00000256389	ADAM20	5.3e-05	0.268	900	0.620839
ENSP00000256398	ELP3	1.03e-05	0.964	587	0.775596
ENSP00000256412	ADAMDEC1	7.35e-05	0.11	165	0.215552
ENSP00000256429	MBD2	4.69e-05	0.758	360	0.878952
ENSP00000256433	IER3IP1	3.09e-05	0.99	309	0
ENSP00000256441	MRPS36	2.11e-05	0.988	0	0.298424
ENSP00000256442	CCNB1	1.43e-05	0.82	996	0.875634
ENSP00000256443	CDK7	1.26e-05	0.834	957	0.882055
ENSP00000256447	CD180	2.13e-05	0.672	914	0.734988
ENSP00000256458	IRAK2	1.34e-05	0.834	987	0.989164
ENSP00000256460	CAMK1	2.45e-05	0.206	318	0
[truncated: 12,322 more rows]
