# Supplementary material for: Identification of Novel Lung Cancer Driver Genes Connecting Different Omics Levels With a Heat Diffusion Algorithm
Source: Front Cell Dev Biol. 2022 Jan 26;10:825272. doi: 10.3389/fcell.2022.825272 (PMC8826452; doi:10.3389/fcell.2022.825272)
Supplement: Supplementary file 2 [file Table3.XLSX]

## Sheet: Sheet1
Ensembl ID	Gene symbol	Heat	P-value	MAS	MFS
ENSP00000000233	ARF5	1.14e-05	0.954	347	0.93748
ENSP00000000412	M6PR	1.93e-05	0.942	644	0.392787
ENSP00000000442	ESRRA	3.51e-05	0.938	914	0.931374
ENSP00000001008	FKBP4	1.32e-05	0.944	900	0.73211
ENSP00000001146	CYP26B1	3.87e-05	0.95	956	0.678421
ENSP00000002125	NDUFAF7	2.73e-05	0.96	250	0.393618
ENSP00000002165	FUCA2	3.79e-05	0.92	440	0.343963
ENSP00000002596	HS3ST1	3.62e-05	0.924	917	0.447091
ENSP00000002829	SEMA3F	4.55e-05	0.682	345	0.805624
ENSP00000003100	CYP51A1	2.87e-05	0.942	489	0.776032
ENSP00000003302	USP28	2.38e-05	0.93	758	0.54567
ENSP00000004103	TMEM176A	2.85e-05	0.846	167	0.568559
ENSP00000004531	SLC7A2	1.79e-05	1	408	0.777043
ENSP00000004921	CCL18	4.63e-05	0.168	897	0
ENSP00000005180	CCL26	2.11e-05	0.932	0	0.764891
ENSP00000005226	USH1C	3.21e-05	0.08	985	0.785625
ENSP00000005260	BAIAP2L1	6.62e-05	0.812	557	0.373758
ENSP00000005284	CACNG3	4.18e-05	0.038	959	0.822036
ENSP00000005286	TMEM132A	7.04e-05	0.858	446	0.537371
ENSP00000005340	DVL2	1.75e-05	0.936	998	0.929684
ENSP00000005386	RPAP3	3.23e-05	0.958	572	0.455304
ENSP00000005558	IFRD1	3.29e-05	0.9	862	0.549202
ENSP00000005587	SKAP2	2.96e-05	0.938	511	0.187515
ENSP00000005905	-	4.41e-05	0.936	396	0
ENSP00000005995	PRSS21	5.61e-05	0.616	418	0.390962
ENSP00000006015	HOXA11	4.54e-05	0.462	747	0.975696
ENSP00000006053	CX3CL1	2.09e-05	0.25	906	0.73858
ENSP00000006101	COPZ2	2.34e-05	0.926	467	0
ENSP00000006275	TRAPPC6A	1.83e-05	0.83	909	0.325922
ENSP00000006526	WDR54	7.35e-05	0.95	203	0.665392
ENSP00000006658	SPATA20	4.73e-05	0.232	676	0.394866
ENSP00000006777	RHBDD2	3.59e-05	0.606	481	0.464095
ENSP00000007264	RPUSD1	2.12e-05	0.938	454	0.580078
ENSP00000007390	TSR3	3.99e-05	0.93	507	0.253599
ENSP00000007414	OSBPL7	2.1e-05	0.938	351	0.243259
ENSP00000007722	ITGA3	3.53e-05	0.532	900	0.789157
ENSP00000007735	KRT33A	6.21e-05	0.212	365	0.530582
ENSP00000007969	LRRC23	1.41e-05	0.962	411	0.804518
ENSP00000008391	TFAP2D	8.33e-05	0.954	593	0.584164
ENSP00000008527	CRY1	2.46e-05	0.938	847	0.820209
ENSP00000009041	STARD3NL	0.00019191	0.934	319	0.366363
ENSP00000009105	CAMK1G	1e-05	0.948	757	0.997171
ENSP00000009180	CD9	2.37e-05	0.248	995	0.886053
ENSP00000009530	CD74	2.82e-05	0.532	900	0.787404
ENSP00000010299	FAM76A	0.000133356	0.94	200	0.496714
ENSP00000010404	MGST1	3.02e-05	0.908	941	0.623654
ENSP00000011292	CPA1	2.32e-05	0.706	377	0.274565
ENSP00000011473	SYPL1	0.000129479	0.934	309	0.455809
ENSP00000011619	RANBP9	2.05e-05	0.96	817	0.521403
ENSP00000011653	CD4	1.64e-05	0.218	981	0.950912
ENSP00000011684	PLEKHG6	3.94e-05	0.874	850	0.349135
ENSP00000011691	SS18L2	4.59e-05	0.926	483	0.5504
ENSP00000011898	TSPAN9	4.82e-05	0.934	214	0.422435
ENSP00000012049	QPCTL	3.3e-05	0.956	307	0.313912
ENSP00000012134	HIVEP2	1.5e-05	0.95	512	0.971565
ENSP00000013034	NME1	1.13e-05	0.946	911	0.860241
ENSP00000013070	UBR7	6.71e-05	0.938	430	0.422934
ENSP00000013125	MAP4K5	1.1e-05	1	425	0.992672
ENSP00000013807	ERCC1	1.74e-05	0.94	900	0.857299
ENSP00000014914	GPRC5A	6.69e-05	0.902	265	0.538807
ENSP00000014930	HEBP1	5.85e-05	0.49	946	0.959026
ENSP00000014935	DNASE1L1	5.83e-05	0.486	661	0.377956
ENSP00000016171	COX15	1.47e-05	0.952	228	0.430838
ENSP00000016913	MS4A12	7.76e-05	0.142	307	0.851198
ENSP00000017003	XYLT2	2.55e-05	0.582	826	0.437709
ENSP00000019103	SCTR	2.99e-05	0.086	972	0.822098
ENSP00000019317	RALBP1	2.08e-05	0.944	939	0.688003
ENSP00000020673	PSD	1.92e-05	0.944	486	0.414579
ENSP00000020926	SYT13	5.33e-05	0.202	887	0.455611
ENSP00000020945	SNAI2	1.97e-05	0.508	953	0.984255
ENSP00000023064	SLC7A9	2.43e-05	0.918	586	0.846662
ENSP00000023897	GABRA1	2.79e-05	0.41	571	0.605989
ENSP00000023939	RTFDC1	6.93e-05	0.948	206	0.534768
ENSP00000024061	SLC45A4	5.35e-05	0.828	580	0.54232
ENSP00000025008	RB1CC1	1.98e-05	0.926	429	0.681901
ENSP00000025301	AKAP11	8.47e-05	0.936	643	0.365291
ENSP00000026218	PIGQ	2.48e-05	0.942	606	0.24696
ENSP00000029410	B4GALT7	2.4e-05	0.708	920	0.666174
ENSP00000033079	FAM13B	4.98e-05	0.956	909	0.496732
ENSP00000035307	CHPF2	2.16e-05	0.766	533	0.41496
ENSP00000035383	LRRC7	1.71e-05	0.928	777	0.803737
ENSP00000037243	GABARAPL2	1.36e-05	0.948	416	0.401021
ENSP00000037869	FAM136A	3.8e-05	0.936	181	0.505012
ENSP00000039989	TTC17	5.68e-05	0.926	899	0.623574
ENSP00000040584	HOXC8	3.06e-05	0.778	971	0.969703
ENSP00000040663	MRI1	4.14e-05	0.974	407	0.375555
ENSP00000040738	BOD1L1	3.92e-05	0.938	238	0.446181
ENSP00000040877	TARBP1	1.52e-05	0.936	495	0.60209
ENSP00000042931	BEST2	4.19e-05	0.354	793	0.630459
ENSP00000043402	RTN4R	1.38e-05	0.936	587	0.842177
ENSP00000044462	PSMA4	1.34e-05	0.93	997	0.717614
ENSP00000045083	FAM65C	4.45e-05	0.644	531	0.593269
ENSP00000046087	ZPBP	3.59e-05	0.296	534	0.420014
ENSP00000046794	LCP2	2.55e-05	0.928	900	0.840104
ENSP00000052754	DCN	1.34e-05	0.566	965	0.929973
ENSP00000053243	TNFRSF17	2.34e-05	0.884	757	0.757224
ENSP00000053468	MRPS10	1.01e-05	0.918	604	0.73612
ENSP00000053867	GRN	2.08e-05	0.872	888	0.766798
ENSP00000054650	THAP3	5.93e-05	1	263	0.468618
ENSP00000054666	VAMP3	1.46e-05	0.958	873	0.667544
ENSP00000054668	UTS2	3.65e-05	0.034	902	0.827508
ENSP00000054950	RCN1	2.01e-05	0.884	985	0.578781
ENSP00000055077	RFC2	1.26e-05	0.926	826	0.926742
ENSP00000055335	PPP1R3F	5.71e-05	0.146	509	0.298318
ENSP00000055682	KIAA2022	8.83e-05	0.18	540	0.420002
ENSP00000056217	ARHGEF5	2.23e-05	0.914	900	0.871802
ENSP00000056233	NFE2L3	3.59e-05	0.926	779	0.854212
ENSP00000057513	TNIP3	6.83e-05	0.756	740	0.352914
ENSP00000058691	HEBP2	6.81e-05	0.93	167	0
ENSP00000061240	TLL1	7.63e-05	0.314	947	0.749761
ENSP00000062104	NNAT	5.73e-05	0.788	561	0.313155
ENSP00000064571	CBLN4	3.81e-05	0.546	309	0.340266
ENSP00000064724	CLDN11	2.04e-05	0.678	846	0.523248
ENSP00000064780	RELT	2.82e-05	0.732	182	0.341625
ENSP00000070846	PKP2	2.64e-05	0.694	537	0.758901
ENSP00000071281	FHL1	5.06e-05	0.934	828	0.599814
ENSP00000072644	YIPF1	3.33e-05	0.952	504	0.740817
ENSP00000072869	ADCK2	3.29e-05	0.942	228	0.257259
ENSP00000074304	INPP4A	4.39e-05	0.896	900	0.40277
ENSP00000075120	SLC2A3	1.91e-05	0.946	826	0.811008
ENSP00000078429	GNA11	1.42e-05	0.888	957	0.897727
ENSP00000078445	CREB3L3	2.11e-05	0.63	848	0.590561
ENSP00000078527	PIGV	2.33e-05	0.948	483	0.243014
ENSP00000081029	MRPS35	2.68e-05	0.938	206	0.447085
ENSP00000083182	APPBP2	1.17e-05	0.926	507	0.700311
ENSP00000084798	CA11	3.02e-05	0.52	517	0.430047
ENSP00000085068	ISOC2	4.64e-05	0.95	516	0.456767
ENSP00000085219	CD22	2.73e-05	0.768	824	0.826844
ENSP00000086933	GSC2	3.44e-05	0.428	444	0.940739
ENSP00000155093	ZFY	1.35e-05	0.948	341	0.980553
ENSP00000155840	KCNQ1	1.75e-05	0.704	999	0.719103
ENSP00000155858	TRPM5	2.54e-05	0.57	544	0.699706
ENSP00000156471	AQR	1.96e-05	0.946	489	0.710679
ENSP00000156499	KLK14	3.15e-05	0.492	196	0.457077
ENSP00000156626	ST6GALNAC1	3.43e-05	0.69	920	0.642492
ENSP00000156825	MBD3	8.48e-05	0.944	837	0.892325
ENSP00000157600	LMCD1	1.03e-05	0.93	159	0.421034
ENSP00000157812	PSMC4	1.4e-05	0.94	960	0.786251
ENSP00000158009	FNDC8	3.86e-05	0.642	183	0.777425
ENSP00000158166	CAMKK1	2.22e-05	0.542	999	0.793941
ENSP00000158762	ACAP1	1.88e-05	0.94	502	0.410187
ENSP00000158771	DERL2	2.03e-05	0.932	576	0.523303
ENSP00000159060	NOX3	3.55e-05	0.064	697	0.868479
ENSP00000159087	ANO8	2.65e-05	0.95	369	0.37698
ENSP00000159111	KDM4B	3.19e-05	0.956	428	0.918415
ENSP00000160262	ICAM3	2.69e-05	0.374	900	0.808186
ENSP00000160373	CTTNBP2	1.58e-05	0.882	532	0.913843
ENSP00000160740	CIC	2.9e-05	0.726	410	0.670719
ENSP00000160827	KIF22	3.41e-05	0.222	942	0.896015
ENSP00000161006	PRSS22	3.27e-05	0.492	261	0.370835
ENSP00000161559	CEACAM1	4.22e-05	0.026	970	0.739392
ENSP00000162023	MEF2BNB-MEF2B	1.16e-05	1	737	0
ENSP00000162044	TMEM161A	0.000141295	0.894	300	0.671004
ENSP00000162391	FOXJ2	1.16e-05	0.924	402	0
ENSP00000162749	TNFRSF1A	1.76e-05	0.948	957	0.949103
ENSP00000164133	PPP2R5B	1.93e-05	0.878	910	0.713041
ENSP00000164139	PYGM	1.79e-05	0.888	757	0.560725
ENSP00000164227	BCL3	1.42e-05	0.912	481	0.952079
ENSP00000164305	PIGB	3.58e-05	0.94	900	0.285286
ENSP00000164640	PDZD4	7.71e-05	0.148	507	0.299828
ENSP00000165524	PRLH	5.6e-05	0.116	302	0.510074
ENSP00000166139	FSTL3	3.89e-05	0.78	621	0.814024
ENSP00000166244	EPHA8	1.01e-05	0.938	900	0.997497
ENSP00000166534	P4HA2	3.41e-05	0.94	900	0.631703
ENSP00000167106	VASH1	0.000121165	0	428	0.318367
ENSP00000167586	KRT14	3.09e-05	0.57	748	0.941198
ENSP00000167588	KRT20	9.74e-05	0	410	0.441597
ENSP00000168216	HSD17B10	1.61e-05	0.888	541	0.459537
ENSP00000168712	FGF4	2.59e-05	0.636	999	0.990924
ENSP00000168977	NMRK2	2.18e-05	0.844	459	0.379346
ENSP00000169298	ST6GAL1	3.21e-05	0.604	536	0.74557
ENSP00000169551	TIMM21	4.48e-05	0.94	483	0.271456
ENSP00000170150	BPIFB2	8.42e-05	0.212	325	0.560298
ENSP00000170168	REXO1	1.34e-05	0.94	733	0.721407
ENSP00000170447	MKRN2	2.14e-05	0.946	0	0.410709
ENSP00000170564	GPATCH1	4.07e-05	0.944	303	0.469574
ENSP00000170630	IL4R	2.5e-05	0.734	976	0.901471
ENSP00000171111	KEAP1	1.96e-05	0.942	866	0.825488
ENSP00000171214	RDH8	3.72e-05	0.95	757	0
ENSP00000171757	P2RY10	3.8e-05	0.136	908	0.865558
ENSP00000172229	NGFR	1.89e-05	0.642	998	0.954782
ENSP00000173229	NTN1	2.89e-05	0.852	999	0.923052
ENSP00000173527	ISOC1	7.45e-05	0.936	201	0.432635
ENSP00000173898	TRO	2.44e-05	0.94	959	0.739622
ENSP00000174618	MNT	1.84e-05	0.95	499	0.744444
ENSP00000174653	AP3M2	2.16e-05	0.918	434	0.445613
ENSP00000175091	LAPTM4A	5.55e-05	0.942	644	0.421425
ENSP00000175238	ADAM7	3.31e-05	0.184	362	0.248517
ENSP00000175506	ASNS	1.96e-05	0.928	903	0.60176
ENSP00000175756	PTPN18	2.09e-05	0.73	634	0.814353
ENSP00000176183	DRD4	2.69e-05	0.38	913	0.887352
ENSP00000176195	SCT	7.72e-05	0.67	963	0.748646
ENSP00000176763	STK10	6.63e-05	0.93	630	0.380409
ENSP00000177648	ALPK1	3.8e-05	0.64	407	0.418576
ENSP00000177694	TBX21	2.02e-05	0.616	895	0.939951
ENSP00000178638	CA12	5.55e-05	0.544	461	0.422261
ENSP00000178640	MAP2K5	1.01e-05	0.916	929	0.995381
ENSP00000179259	C12orf5	1.77e-05	0.944	913	0
ENSP00000180166	FGF20	2.81e-05	0.15	978	0.966506
ENSP00000180173	MTMR7	1.79e-05	0.91	721	0.251316
ENSP00000181796	FAM107B	0.00046266	0.93	0	0.671051
ENSP00000181839	CDK13	1.44e-05	0.964	485	0.912007
ENSP00000182096	CRYBG3	1.39e-05	0.938	412	0
ENSP00000182290	TSPAN32	4.43e-05	0.402	681	0.529094
ENSP00000182377	FAR2	4.29e-05	0.936	218	0.263735
ENSP00000182527	TRAM2	5.23e-05	0.926	626	0.347137
ENSP00000184183	ROPN1	4.87e-05	0.422	499	0.472997
ENSP00000184266	NDUFB4	2.6e-05	0.944	212	0.651157
ENSP00000184956	HEATR6	6.44e-05	0.946	378	0.820821
ENSP00000185150	ERLEC1	2.59e-05	0.922	812	0.217397
ENSP00000186436	TMEM131	3.7e-05	0.922	506	0.254167
ENSP00000187397	ARPP21	2.36e-05	0.886	834	0.495855
ENSP00000187762	TMEM38A	4.87e-05	0.352	390	0.329294
ENSP00000190165	DMRT3	2.91e-05	0.35	611	0.728728
ENSP00000192314	GAL3ST2	2.1e-05	0.894	311	0.432232
ENSP00000192788	UHRF1BP1	5.13e-05	0.936	776	0.47915
ENSP00000193322	OSTM1	5.28e-05	0.936	934	0.249872
ENSP00000193391	IMPG2	4.4e-05	0.232	527	0.781855
ENSP00000194118	KIAA0141	1.35e-05	0.952	507	0.704204
ENSP00000194130	SLC13A1	1.84e-05	0.93	518	0.57058
ENSP00000194152	PCDHB4	0.000139135	0.936	187	0.537952
ENSP00000194155	PCDHB2	0.000138795	0.936	198	0.576186
ENSP00000194214	HSPB11	3.45e-05	0.94	211	0.263711
ENSP00000194530	STRADB	3.42e-05	0.942	462	0.36005
ENSP00000195455	C4orf6	7.67e-05	0.124	325	0
ENSP00000195654	DOPEY1	2.03e-05	0.932	584	0.318877
ENSP00000196061	PLOD1	3.01e-05	0.818	848	0.561718
ENSP00000196371	OXCT1	1.89e-05	0.938	863	0.526806
ENSP00000196482	ZNF324	1.58e-05	0.938	341	0.995643
ENSP00000196489	ZNF416	1.8e-05	0.926	341	0.996737
ENSP00000196548	ZNF8	1.57e-05	0.942	341	0
ENSP00000197268	KIAA1467	0.000179884	0.892	315	0
ENSP00000198536	PILRA	2.2e-05	0.764	418	0.463897
ENSP00000198765	CPNE3	3.68e-05	0.946	379	0.322457
ENSP00000198767	RRN3	3.25e-05	0.936	954	0.841703
ENSP00000198801	MOGAT2	2.57e-05	0.51	438	0.351498
ENSP00000199280	AQP2	1.45e-05	0.93	909	0.820704
ENSP00000199389	EIF2AK1	2.22e-05	0.912	485	0.526699
ENSP00000199706	MRPL28	2.23e-05	0.946	388	0.440027
ENSP00000199708	HBQ1	3.77e-05	0.834	732	0.682574
ENSP00000199764	CEACAM6	4.43e-05	0.042	970	0.736604
ENSP00000199814	RBM22	1.5e-05	0.936	501	0.637993
ENSP00000199936	HSD17B2	3.38e-05	0.444	958	0.50654
ENSP00000200135	ZW10	4.12e-05	0.45	999	0.820774
ENSP00000200181	ITGB4	4.21e-05	0.906	997	0.864153
ENSP00000200453	PPP1R15A	1.41e-05	0.95	377	0.747075
ENSP00000200457	TRIP6	2.67e-05	0.95	907	0.675481
ENSP00000200557	ADAM11	2.96e-05	0.714	572	0.364179
ENSP00000200652	SLC22A4	1.77e-05	0.926	754	0.56133
ENSP00000200676	CETP	3.03e-05	0.41	987	0.782228
ENSP00000200691	MT3	3.77e-05	0.76	181	0.400946
ENSP00000201031	TFAP2C	4.98e-05	0.932	667	0.921354
ENSP00000201586	SULT2B1	1.52e-05	0.372	933	0.88779
ENSP00000201647	EPS8L1	3.08e-05	0.806	648	0.452168
ENSP00000202017	PDRG1	4.05e-05	0.95	173	0.386385
ENSP00000202556	PPP1R13B	3.74e-05	0.936	404	0.724539
ENSP00000202625	TGM6	2.91e-05	0.71	530	0.396056
ENSP00000202677	RALGAPA2	1.69e-05	0.956	407	0.401233
ENSP00000202788	-	7.08e-05	0.942	914	0
ENSP00000202816	ESF1	1.01e-05	0.946	365	0.72159
ENSP00000202831	SLC24A6	4.35e-05	0.88	330	0
ENSP00000202967	SIRT4	2.56e-05	0.962	340	0.907479
ENSP00000203556	GMIP	4.55e-05	0.928	906	0.542869
ENSP00000203629	LAG3	1.61e-05	0.92	747	0.716109
ENSP00000203630	MLF2	2.47e-05	0.94	538	0.287644
ENSP00000203664	OTUB2	3.86e-05	0.946	344	0.298797
ENSP00000204517	TFAP4	5.48e-05	0.934	653	0.879227
ENSP00000204549	PDCD7	0.000184852	0.942	499	0.41507
ENSP00000204566	SPG21	2.85e-05	0.892	743	0.561627
ENSP00000204604	CHRD	2.75e-05	0.126	918	0.973134
ENSP00000204615	THPO	2.58e-05	0.236	757	0.930752
ENSP00000204679	GNPTG	2.52e-05	0.95	456	0.200245
ENSP00000204726	GOLGA3	0.000103704	0.952	801	0.297671
ENSP00000204961	EFNB1	2.5e-05	0.612	920	0.936719
ENSP00000205061	GLG1	4.53e-05	0.764	923	0.390307
ENSP00000205194	NAT14	0.000164	0.856	483	0.494403
ENSP00000205214	AASDH	2.18e-05	0.93	518	0.534798
ENSP00000205386	LAMB4	3.97e-05	0.336	822	0.601289
ENSP00000205557	ABCC6	1.94e-05	0.942	556	0.823291
ENSP00000205636	CMTM6	8.44e-05	0.962	724	0.564704
ENSP00000205890	MYO15A	2.1e-05	0.546	741	0.784915
ENSP00000205948	APOH	3.54e-05	0.658	854	0.665682
ENSP00000206020	SPAG7	8.2e-05	0.948	449	0.269072
ENSP00000206249	ESR1	1.35e-05	0.654	999	0
ENSP00000206380	TMEM101	5.58e-05	0.948	255	0.423717
ENSP00000206423	CCDC80	3.16e-05	0.488	453	0.294603
ENSP00000206474	HAUS4	0.000157138	0.828	192	0.46236
ENSP00000206513	CEBPE	3.12e-05	0.732	732	0.867576
ENSP00000206542	OSGEP	1.47e-05	0.924	940	0.333863
ENSP00000206544	SLC22A17	0.000115611	0.716	811	0.378575
ENSP00000206595	G2E3	4.78e-05	0.718	325	0.480103
ENSP00000207437	MYL6B	2.33e-05	0.804	927	0
ENSP00000207549	UNC13D	3.44e-05	0.904	878	0.582442
ENSP00000207870	XYLB	2.75e-05	0.938	520	0.451489
ENSP00000209718	KRT23	3.6e-05	0.498	407	0.558007
ENSP00000209873	AAAS	4.16e-05	0.906	514	0.487801
ENSP00000209875	CBX5	2.67e-05	0.87	931	0.968867
ENSP00000209884	KLHL20	2.63e-05	0.936	576	0.835356
ENSP00000210060	DHPS	1.33e-05	0.94	534	0.505028
ENSP00000210313	PSMD5	3.52e-05	0.936	910	0.7622
ENSP00000210444	NANS	2.74e-05	0.924	580	0.423833
ENSP00000210633	SEMA4G	4.52e-05	0.572	336	0.785172
ENSP00000211076	TPSD1	4.52e-05	0.204	242	0.453301
ENSP00000211314	TMEM14A	0.000126616	0.944	0	0.607107
ENSP00000211413	PRRT1	1.24e-05	0.938	0	0.486092
ENSP00000211936	ZNF184	1.45e-05	0.944	341	0.988284
ENSP00000211998	VCL	1.57e-05	0.786	997	0.90627
ENSP00000212015	SIRT1	1.14e-05	0.954	984	0.961031
ENSP00000214869	TMED1	5.36e-05	0.938	852	0.286423
ENSP00000215057	MZF1	1.5e-05	0.93	912	0.969137
ENSP00000215061	OCEL1	3.39e-05	0.682	418	0.462727
ENSP00000215071	PSMD8	1.84e-05	0.934	906	0.761945
ENSP00000215095	STX1B	1.88e-05	0.906	576	0.902603
ENSP00000215115	BCL7C	2.37e-05	0.886	345	0.363376
ENSP00000215368	EFNA2	2.99e-05	0.334	889	0.911868
ENSP00000215479	AMELY	4e-05	0.202	608	0.353246
ENSP00000215530	FGF22	3.08e-05	0.368	909	0.979195
ENSP00000215531	C19orf77	0.000437391	1	204	0
ENSP00000215555	2021-03-02	2.37e-05	0.934	635	0.332055
ENSP00000215565	NDUFB7	1.52e-05	0.94	672	0.60654
ENSP00000215567	TECR	1.9e-05	0.906	446	0.370596
ENSP00000215570	TIMM13	1.76e-05	0.934	337	0.611033
ENSP00000215582	C19orf21	7.8e-05	0.948	813	0
ENSP00000215591	POLRMT	2.17e-05	0.928	407	0
ENSP00000215631	GADD45B	3.05e-05	0.784	943	0.904402
ENSP00000215637	MADCAM1	3.89e-05	0.062	748	0.819853
ENSP00000215659	MAPK12	1.04e-05	0.836	925	0.988532
ENSP00000215727	SERPIND1	5.21e-05	0.008	845	0.619582
ENSP00000215730	SNAP29	2.76e-05	0.93	986	0.579608
ENSP00000215739	LZTR1	3.74e-05	0.932	384	0.520566
ENSP00000215742	THAP7	2.68e-05	0.924	150	0.393234
ENSP00000215754	MIF	3.25e-05	0.524	802	0.916811
ENSP00000215770	DDTL	7.28e-05	0.952	183	0.398029
ENSP00000215773	DDT	3.84e-05	0.702	863	0.889426
ENSP00000215780	GSTT2	1.64e-05	0.94	629	0
ENSP00000215781	OSM	4.2e-05	0.122	995	0.93039
ENSP00000215793	SF3A1	1.28e-05	0.954	804	0.720206
ENSP00000215794	USP18	1.44e-05	0.944	806	0.433093
ENSP00000215829	SNRPD3	1.24e-05	0.94	329	0.741035
ENSP00000215838	TCN2	2.12e-05	0.774	284	0.742941
ENSP00000215855	CRYBB3	3.69e-05	0.588	750	0.44941
ENSP00000215862	MORC2	6.37e-05	0.684	811	0.351875
ENSP00000215882	SLC25A1	1.28e-05	0.934	608	0.291261
ENSP00000215886	LGALS2	1.37e-05	0.962	199	0.380331
ENSP00000215904	PDXP	1.71e-05	0.79	571	0.60097
ENSP00000215906	ASPHD2	3e-05	0.674	302	0.335724
ENSP00000215909	LGALS1	2.39e-05	0.704	909	0.871502
ENSP00000215912	PIK3IP1	4.15e-05	0.432	456	0.49728
ENSP00000215917	SRRD	2.8e-05	0.814	183	0.319678
ENSP00000215939	CRYBB1	4.16e-05	0.438	700	0.425272
ENSP00000215941	ANKRD54	1.55e-05	0.952	398	0.937016
ENSP00000215957	MICALL1	2.03e-05	0.948	475	0.502173
ENSP00000215980	CENPM	5.53e-05	0.554	989	0.82413
ENSP00000216029	CBY1	5.34e-05	0.33	309	0.508889
ENSP00000216034	TOMM22	2.29e-05	0.966	343	0.345428
ENSP00000216036	RTDR1	3.21e-05	0.868	597	0
ENSP00000216037	XBP1	2.03e-05	0.936	800	0.894406
ENSP00000216038	C22orf28	2.65e-05	0.936	506	0
ENSP00000216039	JOSD1	5.11e-05	0.948	349	0.34454
ENSP00000216044	GTPBP1	3.18e-05	0.874	655	0.238379
ENSP00000216068	DNAL4	2.9e-05	0.412	900	0.641479
ENSP00000216071	C22orf31	4.69e-05	0.746	150	0.635436
ENSP00000216085	RHBDD3	4.69e-05	0.906	566	0.332383
ENSP00000216099	APOBEC3D	6.4e-05	0.94	779	0.639059
ENSP00000216106	HMGXB4	1.15e-05	0.934	343	0.560597
ENSP00000216115	BIK	4.56e-05	0.952	341	0.59124
ENSP00000216117	HMOX1	2.06e-05	0.762	939	0.916082
ENSP00000216121	NIPSNAP1	2.33e-05	0.95	198	0.319856
ENSP00000216122	MCM5	1.25e-05	0.858	999	0
ENSP00000216124	ARSA	2.18e-05	0.768	924	0.444646
ENSP00000216129	TTLL12	4.01e-05	0.944	914	0.390807
ENSP00000216133	CBX7	1.41e-05	0.914	961	0.784384
ENSP00000216139	ACR	1.94e-05	0.394	471	0.381254
ENSP00000216144	CABP7	1.15e-05	0.934	575	0
ENSP00000216160	TAB1	1.63e-05	0.954	970	0.867267
ENSP00000216177	PNPLA5	2.56e-05	0.79	390	0.348652
ENSP00000216180	PNPLA3	2.38e-05	0.572	932	0.593603
ENSP00000216181	MYH9	1.54e-05	0.564	900	0.905905
ENSP00000216185	TXN2	1.14e-05	0.942	616	0.684723
ENSP00000216187	FOXRED2	5.16e-05	0.844	416	0.819746
ENSP00000216190	EIF3D	1.07e-05	0.922	520	0.727281
ENSP00000216194	ADSL	1.98e-05	0.938	905	0.564705
ENSP00000216200	PVALB	1.07e-05	0.93	877	0.983293
ENSP00000216214	FAM118A	8.33e-05	0.962	330	0.518091
ENSP00000216218	ST13	4.24e-05	0.964	576	0.303742
ENSP00000216223	IL2RB	1.9e-05	0.848	835	0.935296
ENSP00000216225	RBX1	1.12e-05	0.942	972	0.880833
ENSP00000216237	L3MBTL2	2.37e-05	0.934	372	0.784288
ENSP00000216241	CHADL	1.72e-05	0.942	587	0.95491
ENSP00000216252	PHF5A	1.47e-05	0.948	476	0.693584
ENSP00000216254	ACO2	1.17e-05	0.958	538	0.657692
ENSP00000216259	PMM1	1.84e-05	0.938	906	0.378335
ENSP00000216264	CERK	2.51e-05	0.94	454	0.314722
ENSP00000216268	ZBED4	4.97e-05	0.552	407	0.591295
ENSP00000216277	PAPOLA	1.61e-05	0.934	860	0.758062
ENSP00000216286	NID2	4.42e-05	0.254	651	0.642595
ENSP00000216294	SNAPC1	5.02e-05	0.928	641	0.541249
ENSP00000216297	SUPT16H	1.62e-05	0.948	658	0.957923
ENSP00000216336	CTSG	2.38e-05	0.128	989	0.892039
ENSP00000216338	GZMH	3.13e-05	0.356	329	0.389857
ENSP00000216341	GZMB	1.73e-05	0.476	943	0.920183
ENSP00000216366	AP4S1	2.16e-05	0.936	518	0.415525
ENSP00000216373	SOS2	2.17e-05	0.674	929	0.807073
ENSP00000216392	PYGL	1.9e-05	0.944	914	0.625908
ENSP00000216410	GNPNAT1	1.72e-05	0.954	904	0.18559
ENSP00000216416	CNIH	1.04e-05	0.93	456	0
ENSP00000216420	CGRRF1	0.000105803	0.95	519	0.582311
ENSP00000216442	ATP6V1D	1.28e-05	0.956	0	0.252975
ENSP00000216445	C14orf105	2.53e-05	0.812	213	0.599125
ENSP00000216452	PIGH	4.29e-05	0.944	454	0.23916
ENSP00000216455	PSMA3	1.23e-05	0.932	975	0.749373
ENSP00000216465	GSTZ1	1.77e-05	0.91	481	0.592645
ENSP00000216468	TMED8	1.43e-05	0.932	358	0.516314
ENSP00000216471	SAMD15	0.000146364	0.396	379	0.877768
ENSP00000216479	AHSA1	1.37e-05	0.94	800	0.354681
ENSP00000216484	SPTLC2	1.86e-05	0.942	601	0.729389
ENSP00000216487	RIN3	2.23e-05	0.82	233	0.279243
ENSP00000216489	ALKBH1	3.6e-05	0.932	256	0.22794
ENSP00000216492	CHGA	3.04e-05	0.546	581	0.866994
ENSP00000216500	DHRS7	2.99e-05	0.948	312	0.301714
ENSP00000216513	SIX4	3.44e-05	0.616	867	0.940778
ENSP00000216540	SLC10A1	2.95e-05	0.294	915	0.680621
ENSP00000216554	EIF5	1.39e-05	0.952	238	0.760278
ENSP00000216602	ZFYVE21	0.000101262	1	440	0.413835
ENSP00000216629	BDKRB1	3.27e-05	0.026	913	0.979689
ENSP00000216639	VRK1	1.02e-05	0.926	774	0
ENSP00000216714	APEX1	1.24e-05	0.936	903	0.793117
ENSP00000216727	PABPN1	1.37e-05	0.928	561	0.754455
ENSP00000216733	EFS	3.9e-05	0.942	556	0.45311
ENSP00000216775	CPNE6	3.82e-05	0.414	537	0
ENSP00000216780	PCK2	2.14e-05	0.776	710	0.841304
ENSP00000216797	NFKBIA	1.37e-05	0.944	991	0.953914
ENSP00000216799	EMC9	1.48e-05	0.934	471	0.331999
ENSP00000216802	PSME2	2.51e-05	0.94	901	0.718589
ENSP00000216807	BRMS1L	4.2e-05	0.93	841	0.880351
ENSP00000216832	PNN	3.14e-05	0.932	574	0.603771
ENSP00000216840	RABGGTA	2.24e-05	0.962	660	0.240321
ENSP00000216923	ZFP64	1.46e-05	0.942	563	0.97055
ENSP00000216951	GSS	2.64e-05	0.942	965	0.562948
ENSP00000216962	PYGB	2.21e-05	0.848	707	0.585743
ENSP00000216968	PROCR	5.4e-05	0.878	949	0.29909
ENSP00000217043	R3HDML	4.81e-05	0.332	520	0.432924
ENSP00000217073	PABPC1L	1.12e-05	0.926	827	0.770109
ENSP00000217109	CSTF1	1.74e-05	0.944	487	0.705181
ENSP00000217121	TPD52L2	3.88e-05	0.95	471	0.26966
ENSP00000217130	ZNF512B	1.11e-05	0.942	341	0.975817
ENSP00000217131	CTSZ	2.66e-05	0.902	700	0.245896
ENSP00000217159	SLCO4A1	3.13e-05	0.936	328	0.590496
ENSP00000217169	BIRC7	3.64e-05	0.842	830	0.626027
ENSP00000217173	UBOX5	2.02e-05	0.95	380	0.597697
ENSP00000217195	C20orf27	6.24e-05	0.94	223	0.582057
ENSP00000217246	MACROD2	3.18e-05	0.948	278	0.319706
ENSP00000217254	SLC52A3	4.57e-05	0.292	534	0.341802
ENSP00000217270	PROKR2	3.49e-05	0.204	925	0.856572
ENSP00000217299	XKR7	4.26e-05	0.568	200	0
ENSP00000217305	PDYN	2.82e-05	0.302	971	0.932066
ENSP00000217320	TLDC2	6.35e-05	0.71	230	0.682009
ENSP00000217372	CDK5RAP1	1.26e-05	0.934	396	0.559035
ENSP00000217381	SNTA1	3.33e-05	0.206	897	0.713239
ENSP00000217386	OXT	2.48e-05	0.156	954	0.907506
ENSP00000217407	LBP	3.24e-05	0.346	761	0.71926
ENSP00000217420	SLC32A1	2.81e-05	0.652	932	0.572693
ENSP00000217426	AHCY	1.28e-05	0.944	492	0.612156
ENSP00000217429	FAM83D	0.000134457	0.25	552	0.79186
ENSP00000217446	PIGU	3.45e-05	0.922	517	0.300818
ENSP00000217455	ACOT8	1.81e-05	0.81	416	0.536957
ENSP00000217456	APMAP	3.18e-05	0.94	171	0.247418
ENSP00000217515	TXNL1	2.18e-05	0.926	615	0.465591
ENSP00000217652	MYL12A	1.78e-05	0.902	860	0.785586
ENSP00000217740	RNF125	3.14e-05	0.958	305	0.276253
ENSP00000217893	TAF9	2.06e-05	0.9	866	0.953601
ENSP00000217901	IDH3G	1.04e-05	0.924	569	0.643099
ENSP00000217909	SLC25A43	6.65e-05	0.942	329	0.374818
ENSP00000217939	MXRA5	1.6e-05	0.954	587	0.929421
ENSP00000217958	PSMD10	1.61e-05	0.93	909	0.864987
ENSP00000217961	STS	1.56e-05	0.592	905	0.731954
ENSP00000217964	TBL1X	1.81e-05	0.938	923	0.922013
ENSP00000217971	PGRMC1	2.3e-05	0.702	488	0.511477
ENSP00000217999	RHOXF1	3.17e-05	0.478	402	0.942376
ENSP00000218004	NXT2	7.26e-05	0.94	999	0.547901
ENSP00000218008	ATP1B4	3.66e-05	0.688	800	0.341884
ENSP00000218032	TLR8	1.63e-05	0.92	479	0.832458
ENSP00000218056	WDR13	3.11e-05	0.79	563	0.358729
ENSP00000218075	GLRA2	3.31e-05	0.236	900	0.897099
ENSP00000218089	STAG2	2.58e-05	0.754	997	0.810212
ENSP00000218099	F9	3e-05	0.102	976	0.635924
ENSP00000218104	ABCD1	2.11e-05	0.906	375	0.479852
ENSP00000218147	BCORL1	5.6e-05	0.96	412	0.539794
ENSP00000218176	KCND1	3.45e-05	0.184	865	0.756354
ENSP00000218197	SLC25A14	1.69e-05	0.934	580	0.279973
ENSP00000218224	PQBP1	3.87e-05	0.56	547	0.468209
ENSP00000218230	PCSK1N	4.7e-05	0.562	206	0.631045
ENSP00000218249	RAB40AL	2.05e-05	0.746	758	0.64627
ENSP00000218316	GPR50	2.57e-05	0.348	589	0.870932
ENSP00000218340	RP2	4.12e-05	0.93	226	0.374769
ENSP00000218343	PHF16	3.33e-05	0.932	252	0
ENSP00000218348	USP11	1.59e-05	0.954	891	0.564116
ENSP00000218364	HTATSF1	2.2e-05	0.954	387	0.597129
ENSP00000218388	TIMP1	2.46e-05	0.636	999	0.9777
ENSP00000218436	ITIH6	3.44e-05	0.216	381	0.796135
ENSP00000218439	MAGED2	2.95e-05	0.932	409	0.536287
ENSP00000218516	GLA	2.05e-05	0.912	487	0.341274
ENSP00000218548	ATP12A	1.33e-05	1	723	0.81466
ENSP00000218652	NDFIP2	4.01e-05	0.938	598	0.273685
ENSP00000218721	MLNR	3.86e-05	0.108	933	0.890565
ENSP00000218758	ACP5	2.45e-05	0.838	960	0.914534
ENSP00000218894	SUPT20H	1.35e-05	0.934	179	0.661256
ENSP00000219022	OLFM4	3.76e-05	0.152	850	0.293495
ENSP00000219054	ACSM2A	1.4e-05	0.956	390	0.549644
ENSP00000219066	NTHL1	1.37e-05	0.942	619	0.783917
ENSP00000219069	ZNF263	1.35e-05	0.924	523	0.980265
ENSP00000219070	MMP2	2.15e-05	0.612	962	0.982428
ENSP00000219091	ZNF205	1.61e-05	0.938	341	0.986189
ENSP00000219097	ORC6	5.71e-05	0.456	993	0.86522
ENSP00000219139	C16orf70	8.92e-05	0.936	215	0.472933
ENSP00000219150	CORO1A	1.92e-05	0.728	597	0.519011
ENSP00000219162	MT4	5.36e-05	0.67	439	0.521117
ENSP00000219168	LYRM1	1.51e-05	0.928	206	0.467298
ENSP00000219169	NUTF2	2.22e-05	0.934	872	0.757546
ENSP00000219172	CENPT	0.00010538	0.274	997	0
ENSP00000219197	CBLN1	3.57e-05	0.472	544	0.360995
ENSP00000219204	ARL2BP	0.000191257	0.954	282	0.577442
ENSP00000219207	PLLP	6.03e-05	0.232	456	0.358292
ENSP00000219235	CCL22	5.2e-05	0.042	842	0.830648
ENSP00000219244	CCL17	4.89e-05	0.02	863	0.800591
ENSP00000219255	PARD6A	1.97e-05	0.866	904	0.865102
ENSP00000219271	MMP15	4.92e-05	0.636	910	0.854611
ENSP00000219281	USB1	0.000147918	0.954	860	0.370782
ENSP00000219299	CCDC113	0.000105775	0.082	753	0.64623
ENSP00000219301	PRSS54	8.93e-05	0.112	386	0.587976
ENSP00000219302	NME3	1.02e-05	0.95	911	0.747058
ENSP00000219313	PSMD7	1.38e-05	0.95	908	0.753993
ENSP00000219315	SETD6	9.79e-05	1	242	0.419761
ENSP00000219320	SLC38A7	2.73e-05	0.606	412	0.451471
ENSP00000219334	SMPD3	2.99e-05	0.586	910	0.233884
ENSP00000219343	SLC7A6	2.77e-05	0.886	510	0.855698
ENSP00000219345	PLA2G15	2.27e-05	0.926	915	0.475497
ENSP00000219368	FA2H	2.14e-05	0.816	377	0.507107
ENSP00000219400	CMC2	6.27e-05	0.932	349	0.502572
ENSP00000219409	ARHGDIG	2.3e-05	0.908	978	0.643119
ENSP00000219431	MPG	2.35e-05	0.938	900	0.352113
ENSP00000219439	HSDL1	4.28e-05	0.888	337	0.399001
ENSP00000219454	WFDC1	3.51e-05	0.244	397	0.770957
ENSP00000219473	USP10	1.14e-05	0.92	964	0.818756
ENSP00000219476	TSC2	1.93e-05	0.948	801	0.916594
ENSP00000219478	ZNF500	1.61e-05	0.938	426	0.990161
ENSP00000219479	NME4	1.18e-05	0.946	911	0.738372
ENSP00000219481	DECR2	1.86e-05	0.936	518	0.751336
ENSP00000219548	STUB1	1.33e-05	0.948	992	0.913642
ENSP00000219593	ZP2	3.01e-05	0.324	470	0
ENSP00000219596	MEFV	2.23e-05	0.918	459	0.542563
ENSP00000219599	CRYM	2.25e-05	0.574	489	0.198452
ENSP00000219660	AQP8	1.56e-05	0.832	917	0.797193
ENSP00000219689	USP31	1.4e-05	0.944	381	0.347323
ENSP00000219700	HMOX2	1.71e-05	0.746	657	0.907282
ENSP00000219746	TOX3	1.61e-05	0.92	565	0.947842
ENSP00000219782	MAZ	1.53e-05	0.898	842	0.968123
ENSP00000219789	CDIPT	1.37e-05	0.956	909	0.438806
ENSP00000219794	BCKDK	1.82e-05	0.926	612	0.826478
ENSP00000219833	SLC6A2	2.49e-05	0.482	760	0.625945
ENSP00000219837	KNOP1	4.97e-05	0.94	0	0.675149
ENSP00000219905	MGA	3.47e-05	0.932	543	0.958886
ENSP00000219919	AQP9	1.57e-05	0.946	885	0.891244
ENSP00000220003	CSK	1.11e-05	0.932	968	0.994225
ENSP00000220058	MTFMT	1.45e-05	0.932	550	0.676256
ENSP00000220166	CTSH	3.71e-05	0.676	658	0.361384
ENSP00000220244	KIAA1199	3.76e-05	0.39	511	0
ENSP00000220325	EHD4	4.19e-05	0.85	905	0.249958
ENSP00000220420	TGM5	7.79e-05	0.87	530	0.399785
ENSP00000220429	GABPB1	1.73e-05	1	759	0.906225
ENSP00000220478	SCG3	6.13e-05	0.024	905	0.394548
ENSP00000220496	DNAJC17	1.73e-05	0.952	742	0.719289
ENSP00000220509	VPS18	1.76e-05	0.952	688	0.41899
ENSP00000220531	BLOC1S6	4.04e-05	0.94	566	0.329044
ENSP00000220562	EXTL3	1.44e-05	0.732	528	0.609478
ENSP00000220584	FDFT1	2.06e-05	0.904	901	0.729984
ENSP00000220592	AGO2	1.33e-05	0.944	948	0.904594
ENSP00000220597	PAG1	2.13e-05	0.868	294	0.495152
ENSP00000220616	TG	2.02e-05	0.408	818	0.845976
ENSP00000220669	ZFAND1	3.82e-05	0.958	503	0.292583
ENSP00000220763	CPQ	4.62e-05	0.838	275	0.259348
ENSP00000220764	DECR1	1.52e-05	0.632	973	0.922549
ENSP00000220772	SFRP1	3.2e-05	0.08	979	0.976117
ENSP00000220809	PLAT	3.41e-05	0.142	758	0.789396
ENSP00000220812	DKK4	6.18e-05	0.19	634	0.814609
ENSP00000220822	GDAP1	3.79e-05	0.918	664	0.277754
ENSP00000220849	EIF3E	1.11e-05	0.95	622	0.746859
ENSP00000220853	EMC2	4.24e-05	0.944	192	0.323107
ENSP00000220913	CHRAC1	1.15e-05	0.944	974	0
ENSP00000220931	NCALD	1.64e-05	0.924	484	0.797477
ENSP00000220940	GML	4.12e-05	0.36	900	0.2766
ENSP00000220966	PYCRL	1.24e-05	0.936	900	0.465995
ENSP00000221086	MTMR9	5.64e-05	0.942	844	0.291278
ENSP00000221114	DCTN6	1.98e-05	0.95	900	0.324044
ENSP00000221130	GSR	1.43e-05	0.93	918	0.675369
ENSP00000221132	TNFRSF10A	3.02e-05	0.904	675	0.886283
ENSP00000221166	NEFM	3.43e-05	0.76	816	0.662331
ENSP00000221167	-	1.32e-05	0.924	301	0
ENSP00000221200	KCTD9	5.94e-05	0.938	491	0.398898
ENSP00000221204	-	4.03e-05	0.578	810	0
ENSP00000221232	CNOT3	1.26e-05	0.942	254	0.592426
ENSP00000221233	EXOSC5	1.62e-05	0.92	633	0.708295
ENSP00000221265	PAF1	1.38e-05	0.946	631	0.619948
ENSP00000221283	STXBP2	1.85e-05	0.944	991	0.637845
ENSP00000221307	CYP4F3	2.96e-05	0.804	913	0.796935
ENSP00000221315	ZNF432	1.68e-05	1	433	0.991358
ENSP00000221327	ZNF180	1.76e-05	0.948	341	0.996285
ENSP00000221347	FCGBP	6.31e-05	0.12	301	0
ENSP00000221399	TULP2	4.85e-05	0.934	472	0.324286
ENSP00000221418	ECH1	2.69e-05	0.908	581	0.71505
ENSP00000221419	HNRNPL	2.43e-05	0.954	457	0.78854
ENSP00000221444	KCNA7	3.35e-05	0.096	921	0.865212
ENSP00000221452	RELB	2.05e-05	0.928	810	0.936443
ENSP00000221455	CLASRP	2.16e-05	0.668	399	0.311766
ENSP00000221459	LIN7B	3.54e-05	0.338	766	0.283443
ENSP00000221462	PPP1R37	3.39e-05	0.802	398	0.626378
ENSP00000221466	FCGRT	3.72e-05	0.284	512	0.307133
ENSP00000221480	PEX11G	2.77e-05	0.926	365	0.508577
ENSP00000221485	SLC17A7	2.94e-05	0.088	903	0.738657
ENSP00000221486	RNASEH2A	1.66e-05	0.948	644	0.817253
ENSP00000221494	SF3A2	1.43e-05	0.942	576	0.743476
ENSP00000221496	AMH	2.34e-05	0.228	901	0.971371
ENSP00000221498	DKKL1	3.46e-05	0.364	440	0.27826
ENSP00000221538	RSPH6A	4.19e-05	0.322	539	0.583212
ENSP00000221543	TBC1D17	2.32e-05	0.952	378	0.483187
ENSP00000221561	AES	2.28e-05	0.94	828	0.947781
ENSP00000221566	SGTA	1.53e-05	0.504	922	0.719018
ENSP00000221573	SNAPC2	1.25e-05	0.948	0	0.560955
ENSP00000221665	FIZ1	1.57e-05	0.968	485	0.988115
ENSP00000221671	C19orf44	0.00611919	0.96	481	0.861541
ENSP00000221700	CYP4F2	3.33e-05	0.73	913	0.775859
ENSP00000221722	ZIM2	1.6e-05	1	387	0
ENSP00000221730	EPHX3	5.43e-05	0.394	242	0.553387
ENSP00000221740	CASP14	4.5e-05	0.92	574	0
ENSP00000221742	SLC1A6	2.61e-05	0.254	812	0.791937
ENSP00000221797	LGALS13	3.6e-05	0.646	501	0.383102
ENSP00000221804	CLC	4.22e-05	0.382	235	0.377923
ENSP00000221847	EBI3	4.37e-05	0.426	412	0.469936
ENSP00000221855	TBCB	3.97e-05	0.93	936	0.225827
ENSP00000221859	POLR2I	1.41e-05	0.944	900	0.898595
ENSP00000221891	APLP1	2.04e-05	0.706	471	0.61411
ENSP00000221922	CCDC9	5.8e-05	0.946	459	0.521706
ENSP00000221930	TGFB1	1.94e-05	0.486	995	0
ENSP00000221954	CEACAM4	5.77e-05	0.44	207	0.827803
ENSP00000221957	PLIN3	3.55e-05	0.94	449	0.24095
ENSP00000221972	CD79A	1.72e-05	0.358	729	0.922068
ENSP00000221973	LIM2	4.11e-05	0.15	499	0.293059
ENSP00000221978	NKG7	4.13e-05	0.634	680	0.459831
ENSP00000221980	ICAM5	3.62e-05	0.24	627	0.581233
ENSP00000221996	CRX	2.12e-05	0.422	876	0.971526
ENSP00000222002	SULT2A1	2.14e-05	0.476	932	0.643171
ENSP00000222005	CDC37	0.000927323	0.586	994	0.829803
ENSP00000222008	RABAC1	2.09e-05	0.942	475	0.499635
ENSP00000222033	ZNRF4	1.65e-05	0.936	173	0.42576
ENSP00000222115	HAS1	1.47e-05	0.798	732	0.663861
ENSP00000222120	RAB3D	2.56e-05	0.9	675	0.762254
ENSP00000222122	DBP	4.94e-05	0.548	615	0.630779
ENSP00000222125	CAPS	1.18e-05	0.924	600	0.999534
ENSP00000222139	EPOR	2.3e-05	0.914	943	0.921449
ENSP00000222157	FGF21	3.5e-05	0.838	991	0.935464
ENSP00000222212	CACNG7	3.6e-05	0.032	947	0.906453
ENSP00000222214	GCDH	1.64e-05	0.936	724	0.684613
ENSP00000222219	DNASE2	2.05e-05	0.944	342	0.547627
ENSP00000222224	LENG1	7.93e-05	0.424	386	0.649972
ENSP00000222248	SLC5A5	1.52e-05	0.558	667	0.643713
ENSP00000222250	ARRDC2	2.25e-05	0.932	552	0.392671
ENSP00000222254	PIK3R2	2.81e-05	0.942	524	0.839178
ENSP00000222256	RAB3A	1.63e-05	0.878	567	0.759681
ENSP00000222266	PSENEN	2.21e-05	0.92	900	0.646658
ENSP00000222270	WBP7	1.19e-05	0.946	893	0
ENSP00000222275	UPK1A	6.04e-05	0.31	887	0.455494
ENSP00000222284	TMEM147	2.86e-05	0.94	376	0.397727
ENSP00000222286	GAPDHS	1.19e-05	0.926	858	0.675191
ENSP00000222304	HAMP	3.14e-05	0.502	859	0.695953
ENSP00000222305	USF2	2.77e-05	0.83	817	0.93092
ENSP00000222307	KXD1	3.08e-05	0.958	303	0.213876
ENSP00000222329	ERF	4.5e-05	0.924	654	0.848506
ENSP00000222345	SIPA1L3	5.29e-05	0.94	457	0.357483
ENSP00000222374	CADM4	5.83e-05	0.932	284	0.397359
ENSP00000222381	PON1	2.48e-05	0.248	978	0.754358
ENSP00000222382	CYP3A43	3.41e-05	0.294	370	0.848783
ENSP00000222388	ABCF2	1.34e-05	0.952	737	0.545661
ENSP00000222390	HGF	2.44e-05	0.192	910	0.948737
ENSP00000222399	LAMB1	4.07e-05	0.464	900	0.726249
ENSP00000222402	UBE2D4	1.05e-05	0.936	767	0.899275
ENSP00000222462	WNT16	2.39e-05	0.308	906	0.99091
ENSP00000222481	CPA2	1.91e-05	0.818	379	0.316293
ENSP00000222482	CPA4	3.94e-05	0.732	377	0.308657
ENSP00000222511	GTPBP10	1.25e-05	0.942	860	0.679231
ENSP00000222543	TFPI2	3.53e-05	0.324	416	0.701352
ENSP00000222547	BET1	1.64e-05	0.934	665	0.581551
ENSP00000222553	NAMPT	2.52e-05	0.932	924	0.749729
ENSP00000222567	TWISTNB	1.21e-05	0.938	900	0.644825
ENSP00000222572	PON2	4.2e-05	0.912	420	0.570396
ENSP00000222573	ITGB8	4.65e-05	0.5	942	0.740559
ENSP00000222574	HBP1	4.78e-05	0.95	0	0.577108
ENSP00000222584	SP4	1.41e-05	0.952	360	0.961833
ENSP00000222598	DLX5	3.28e-05	0.41	875	0.985335
ENSP00000222644	MPP6	1.47e-05	0.95	882	0.750422
ENSP00000222673	OGDH	1.39e-05	0.928	515	0.664201
ENSP00000222674	NPVF	7.09e-05	0.066	206	0.517634
ENSP00000222718	HOXA2	3.63e-05	0.23	827	0.983018
ENSP00000222725	LFNG	2.6e-05	0.326	946	0.941243
ENSP00000222726	HOXA5	3.69e-05	0.91	772	0.979916
ENSP00000222728	HOXA6	5.43e-05	0.632	647	0.953442
ENSP00000222747	TSPAN12	2.99e-05	0.508	408	0.309022
ENSP00000222753	HOXA13	3.98e-05	0.664	645	0.970921
ENSP00000222792	CHN2	1.87e-05	0.542	940	0.723269
ENSP00000222800	ABHD11	2.18e-05	0.814	601	0.6026
ENSP00000222803	FKBP14	1.25e-05	0.928	303	0.476676
ENSP00000222823	NOD1	2.46e-05	0.748	657	0.836911
ENSP00000222902	CCL24	0.011137	0.12	169	0.640024
ENSP00000222968	PDAP1	9.16e-05	0.77	466	0.36962
ENSP00000222969	BUD31	1.33e-05	0.94	663	0.566821
ENSP00000222982	CYP3A5	2.84e-05	0.338	940	0.884105
ENSP00000222990	SNX8	1.36e-05	0.952	204	0.316791
ENSP00000223023	WASL	1.69e-05	0.944	980	0.74342
ENSP00000223026	HYAL4	3.05e-05	0.716	560	0.708457
ENSP00000223029	AIMP2	1.9e-05	0.928	408	0.461879
ENSP00000223054	MOSPD3	2.27e-05	0.936	518	0.228388
ENSP00000223061	PCOLCE	4.61e-05	0.294	921	0.594746
ENSP00000223095	SERPINE1	2.44e-05	0.618	986	0.966613
ENSP00000223114	MOGAT3	3.51e-05	0.926	934	0.377182
ENSP00000223122	C1GALT1	2.49e-05	0.794	923	0.712865
ENSP00000223127	PLOD3	4.42e-05	0.72	619	0.420557
ENSP00000223129	RPA3	4.27e-05	0.774	918	0.869093
ENSP00000223136	FIS1	1.48e-05	0.954	642	0.365809
ENSP00000223145	GLCCI1	2.03e-05	0.882	198	0.430436
ENSP00000223167	MYL10	1.82e-05	0.42	636	0.768092
ENSP00000223190	NRF1	3.53e-05	0.932	473	0.815135
ENSP00000223208	CEP41	2.48e-05	0.868	356	0.365301
ENSP00000223210	ZNF862	1.4e-05	0.93	343	0.985515
ENSP00000223215	MEST	2.18e-05	0.6	870	0.402578
ENSP00000223271	RARRES2	8.28e-05	0.018	569	0.447555
ENSP00000223273	YAE1D1	1.4e-05	0.938	0	0.681704
ENSP00000223293	GIMAP2	4.22e-05	0.52	311	0.461172
ENSP00000223321	PSMA2	1.05e-05	0.94	964	0.646939
ENSP00000223336	COA1	0.000181329	0.95	0	0.600096
ENSP00000223357	AEBP1	3.44e-05	0.456	381	0.443854
ENSP00000223364	MYL7	1.88e-05	0.468	613	0.728652
ENSP00000223368	BCL7B	1.42e-05	0.934	507	0.349979
ENSP00000223369	YKT6	1.22e-05	0.954	950	0.700749
ENSP00000223398	CLIP2	3.27e-05	0.622	643	0.593279
ENSP00000223428	ZNF510	1.76e-05	0.946	563	0.995877
ENSP00000223459	ZNF688	1.87e-05	0.938	341	0.996725
ENSP00000223528	FKTN	2.68e-05	0.588	590	0.453997
ENSP00000223641	SEC61B	1.27e-05	0.93	576	0.440829
ENSP00000223642	C5	6.62e-05	0.342	998	0.921519
ENSP00000223795	TNFSF8	3.77e-05	0.716	349	0.616244
ENSP00000223862	RLN1	3.79e-05	0.494	982	0.35437
ENSP00000223864	PLGRKT	2.85e-05	0.774	391	0.387026
ENSP00000224073	EDF1	1.94e-05	0.942	414	0.58186
ENSP00000224140	SETX	1.77e-05	0.952	511	0.756267
ENSP00000224181	C8G	8.03e-05	0.016	998	0.589954
ENSP00000224237	VIM	1.53e-05	0.678	908	0.89542
ENSP00000224337	BLNK	2.64e-05	0.562	359	0.719892
ENSP00000224356	CYP26A1	2.88e-05	0.638	944	0.722946
ENSP00000224600	RBP3	8.64e-05	0.278	483	0
ENSP00000224652	ATE1	4.16e-05	0.926	676	0.27886
ENSP00000224756	CCSER2	4.05e-05	0.702	262	0.429245
ENSP00000224764	-	5.03e-05	0.184	993	0
ENSP00000224784	ACTA2	1.2e-05	0.778	997	0.973001
ENSP00000224807	SFXN3	7.66e-05	0.944	181	0.285772
ENSP00000224862	FBXL15	3.73e-05	0.932	457	0.228803
ENSP00000224950	OBFC1	2.5e-05	0.938	517	0.899795
ENSP00000225174	PPIF	1.1e-05	0.942	644	0.631856
ENSP00000225235	TBC1D12	2.77e-05	0.336	563	0.488129
ENSP00000225245	CCL3	2.59e-05	0.212	907	0
ENSP00000225275	MPO	4.81e-05	0.22	955	0.253983
ENSP00000225276	ST6GALNAC2	4.86e-05	0.032	760	0.840168
ENSP00000225296	DHX33	1.7e-05	0.926	435	0.746115
ENSP00000225328	P2RX5	7.9e-05	0.938	583	0.88806
ENSP00000225371	EPX	2.23e-05	0.362	619	0.629843
ENSP00000225387	CRYBA1	2.54e-05	0.67	636	0.669196
ENSP00000225388	NUFIP2	7.29e-05	0.96	450	0.421798
ENSP00000225402	AATF	1.1e-05	0.924	416	0
ENSP00000225410	ZNHIT3	1.37e-05	0.918	453	0
ENSP00000225426	PSMB3	1.73e-05	0.942	955	0
ENSP00000225428	CWC25	1.64e-05	0.926	475	0
ENSP00000225430	RPL19	1.56e-05	0.934	982	0.790734
ENSP00000225504	SUPT4H1	1.79e-05	0.944	557	0.952513
ENSP00000225512	WNT3	2.46e-05	0.15	917	0.993337
ENSP00000225519	SHPK	1.65e-05	0.93	923	0.514084
ENSP00000225525	TAX1BP3	3.62e-05	0.93	201	0.267846
ENSP00000225538	P2RX1	3.1e-05	0.116	616	0.742358
ENSP00000225550	KRT37	8.18e-05	0.132	412	0.616827
ENSP00000225573	PNPO	6.91e-05	0.938	517	0.244011
ENSP00000225576	TVP23C	3.31e-05	0.942	386	0.327739
ENSP00000225577	RPS6KB1	1.02e-05	0.954	962	0
ENSP00000225603	CBX1	2.65e-05	0.938	923	0.943398
ENSP00000225614	GALK1	1.72e-05	0.876	751	0.494708
ENSP00000225648	HOXB6	3.3e-05	0.168	691	0.967441
ENSP00000225655	PFN1	1.55e-05	0.942	767	0.730006
ENSP00000225665	SLC25A11	1.89e-05	0.942	198	0.312873
ENSP00000225688	RASD1	1.14e-05	0.926	548	0.980926
ENSP00000225698	C1QBP	1.64e-05	0.618	954	0.863897
ENSP00000225719	CPD	0.000113828	0.956	455	0.339132
ENSP00000225724	GOSR1	1.34e-05	0.944	519	0.483589
ENSP00000225726	CCDC47	3.53e-05	0.944	548	0.363945
ENSP00000225728	MED31	2.27e-05	0.934	907	0.908859
ENSP00000225729	DRG2	1.7e-05	0.934	513	0.456784
ENSP00000225737	AKAP10	3.21e-05	0.286	506	0.28364
ENSP00000225740	ALDH3A1	1.95e-05	0.606	960	0.583028
ENSP00000225777	SYNGR2	6.9e-05	0.928	681	0.445812
ENSP00000225805	C17orf75	2.35e-05	0.92	206	0.524502
ENSP00000225823	ASIC2	2.96e-05	0.276	577	0.644188
ENSP00000225831	CCL2	2.53e-05	0.208	962	0.961178
ENSP00000225842	CCL1	0.0077312	0.132	822	0.50422
ENSP00000225844	CCL13	6.9e-05	0.004	878	0.694938
ENSP00000225873	PEX12	3.22e-05	0.648	566	0.326729
ENSP00000225893	HNF1B	2.81e-05	0.142	973	0
ENSP00000225899	KRT32	4.82e-05	0.24	479	0.655177
ENSP00000225927	NAGLU	4.03e-05	0.938	673	0.312186
ENSP00000225941	ABI3	1.88e-05	0.586	957	0.437399
ENSP00000225972	LRRC59	5.17e-05	0.912	561	0.542019
ENSP00000225992	PPY	2.97e-05	0.166	960	0.909007
ENSP00000226004	DUSP3	2.2e-05	0.938	547	0.961607
ENSP00000226067	HLF	2.7e-05	0.542	789	0.798541
ENSP00000226091	EFNB3	2.84e-05	0.262	938	0.904964
ENSP00000226105	RANGRF	6.03e-05	0.926	345	0.493425
ENSP00000226193	RCVRN	1.99e-05	0.44	603	0.834708
ENSP00000226207	MYH1	1.8e-05	0.558	900	0.969421
ENSP00000226209	MYH3	1.8e-05	0.62	994	0
ENSP00000226218	SEBOX	2.13e-05	0.312	885	0
ENSP00000226225	TNFAIP1	1.59e-05	0.952	234	0.356833
ENSP00000226230	TMEM97	3.93e-05	0.604	417	0.375668
ENSP00000226247	FOXN1	1.23e-05	0.938	607	0
ENSP00000226253	ALDOC	2.06e-05	0.908	938	0.560027
ENSP00000226279	CD38	2.27e-05	0.158	878	0.882693
ENSP00000226299	LAP3	1.89e-05	0.73	929	0.490201
ENSP00000226317	CXCL6	3.93e-05	0.04	995	0.935524
ENSP00000226319	PHF17	1.64e-05	0.946	252	0
ENSP00000226355	AFM	7.77e-05	0.016	414	0.531329
ENSP00000226382	PHOX2B	3.06e-05	0.488	638	0.867316
ENSP00000226413	GNRHR	2.96e-05	0.098	980	0.855287
ENSP00000226444	SULT1E1	1.98e-05	0.572	943	0.569712
ENSP00000226460	SMR3A	3.9e-05	0.686	303	0.483351
ENSP00000226524	PF4V1	8.82e-05	0.048	901	0.448267
ENSP00000226574	NFKB1	1.15e-05	0.898	996	0
ENSP00000226578	MANBA	1.65e-05	0.802	758	0.35962
ENSP00000226730	IL2	1.7e-05	0.836	995	0.95279
ENSP00000226760	WFS1	3.25e-05	0.754	512	0.434721
ENSP00000226796	GAR1	1.17e-05	0.948	334	0.748588
ENSP00000226798	FRG1	2.14e-05	0.83	680	0.357553
ENSP00000226840	AADAT	3.31e-05	0.906	693	0.620813
ENSP00000226951	CLNK	3.04e-05	0.672	859	0.273399
ENSP00000227065	FAM149A	2.33e-05	0.83	206	0.446007
ENSP00000227135	SPA17	4.47e-05	0.868	862	0.577064
ENSP00000227155	CD82	2.52e-05	0.516	807	0.927736
ENSP00000227163	SPI1	2.19e-05	0.88	995	0.956274
ENSP00000227256	DBX1	3.2e-05	0.32	586	0
ENSP00000227266	CTSC	1.92e-05	0.732	407	0.81084
ENSP00000227322	ZNF259	1.96e-05	0.934	935	0
ENSP00000227348	CRTAM	3.65e-05	0.572	746	0.451013
ENSP00000227349	C11orf63	0.000500804	0.93	0	0.786752
ENSP00000227378	HSPA8	1.04e-05	0.932	999	0.842997
ENSP00000227451	DTX4	3.14e-05	0.938	487	0.281804
ENSP00000227471	UNC93B1	2.6e-05	0.948	225	0.537852
ENSP00000227474	PUS3	1e-05	0.932	654	0.685206
ENSP00000227495	ST3GAL4	3.82e-05	0.722	938	0.756913
ENSP00000227507	CCND1	1.86e-05	0.61	975	0
ENSP00000227520	CCDC86	4e-05	0.93	154	0.473085
ENSP00000227525	TMEM109	2.54e-05	0.928	177	0.438794
ENSP00000227618	ANAPC15	1.82e-05	0.91	900	0.346644
ENSP00000227638	PANX1	5.87e-05	0.914	506	0.566533
ENSP00000227667	APOC3	3.11e-05	0.592	987	0.848875
ENSP00000227752	IL10RA	3.3e-05	0.86	847	0.850079
ENSP00000227756	GALNT18	2.5e-05	0.692	284	0.382664
ENSP00000227758	BIRC2	1.94e-05	0.932	998	0.93492
ENSP00000227868	PDHX	1.27e-05	0.97	916	0.665205
ENSP00000227880	SLC15A3	2.87e-05	0.938	424	0.306212
ENSP00000227918	SCGB2A2	4.82e-05	0.262	669	0.403425
ENSP00000228027	DGAT2	2.53e-05	0.868	915	0.7208
ENSP00000228136	C11orf58	5.8e-05	0.948	171	0.44594
ENSP00000228251	YBX3	2.28e-05	0.934	683	0.85026
ENSP00000228280	KITLG	2.39e-05	0.592	904	0.936483
ENSP00000228284	SART3	1.64e-05	0.948	644	0.696768
ENSP00000228289	ZNF268	1.51e-05	0.934	341	0.993713
ENSP00000228307	PXN	2.09e-05	0.848	983	0.923788
ENSP00000228318	SLC25A3	1.42e-05	0.918	398	0.417269
ENSP00000228434	CD69	2.71e-05	0.118	961	0.922891
ENSP00000228437	PRDM4	2.68e-05	0.424	612	0.966232
ENSP00000228438	CLEC2B	2.55e-05	0.278	584	0.497363
ENSP00000228463	SELPLG	1.95e-05	0.492	998	0.719893
ENSP00000228468	ASIC1	2.57e-05	0.506	542	0.487402
ENSP00000228495	KCTD10	2.26e-05	0.934	235	0.318455
ENSP00000228506	MLEC	0.000102759	0.918	369	0.224321
ENSP00000228510	MVK	2.6e-05	0.944	457	0.554736
ENSP00000228515	CSRNP2	3.81e-05	0.698	235	0.402643
ENSP00000228567	SYT10	4.45e-05	0.25	333	0.499416
ENSP00000228641	MYF6	2.6e-05	0.098	809	0.976347
ENSP00000228644	MYF5	2.31e-05	0.102	951	0.986317
ENSP00000228682	GLI1	1.58e-05	0.542	985	0.97844
ENSP00000228705	PPM1H	4.22e-05	0.932	394	0.500817
ENSP00000228740	LTA4H	2.64e-05	0.95	418	0.566895
ENSP00000228741	ELK3	7.36e-05	0.936	404	0.596306
ENSP00000228799	ITFG2	2.22e-05	0.94	213	0.448918
ENSP00000228811	PRR4	0.000173291	0.92	252	0.536299
ENSP00000228820	PARP11	2.11e-05	0.864	305	0.538872
ENSP00000228825	ARPC3	1.89e-05	0.95	928	0.445914
ENSP00000228837	FGF6	3.77e-05	0.92	997	0.964904
ENSP00000228841	MYL2	1.95e-05	0.192	959	0.809963
ENSP00000228843	RAD51AP1	0.000107191	0.284	415	0.815426
ENSP00000228850	AKAP3	3.48e-05	0.592	936	0.428246
ENSP00000228862	DUSP16	1.58e-05	0.846	547	0.929512
ENSP00000228865	CREBL2	5.65e-05	0.944	282	0.433519
ENSP00000228872	CDKN1B	1.89e-05	0.842	999	0.972809
ENSP00000228887	GPRC5D	1.88e-05	0.874	169	0.610818
ENSP00000228918	LTBR	2.73e-05	0.878	607	0.890089
ENSP00000228938	MGP	1.6e-05	0.374	581	0.856461
ENSP00000228945	ARHGDIB	2.88e-05	0.606	976	0.70237
ENSP00000229030	FZD10	3.13e-05	0.208	969	0.8947
ENSP00000229134	IL26	4.33e-05	0.112	859	0.735783
ENSP00000229135	IFNG	1.77e-05	0.604	926	0
ENSP00000229195	CNOT2	1.98e-05	0.914	316	0.52006
ENSP00000229238	MRPL51	1.4e-05	0.938	312	0.380104
ENSP00000229239	GAPDH	1.7e-05	0.536	867	0
ENSP00000229243	ACRBP	2.23e-05	0.842	505	0.455118
ENSP00000229251	COPS7A	3.51e-05	0.922	480	0.395818
ENSP00000229264	GNB3	1.17e-05	0.918	999	0.989484
ENSP00000229266	CHPT1	3.89e-05	0.946	986	0.498226
ENSP00000229268	USP5	1.31e-05	0.93	217	0.52607
ENSP00000229270	TPI1	1.11e-05	1	571	0.725902
ENSP00000229281	C12orf57	5.45e-05	0.53	242	0.466513
ENSP00000229304	APOBEC1	1.65e-05	0.854	744	0.545071
ENSP00000229307	NANOG	2.38e-05	0.86	999	0.981007
ENSP00000229314	GOLT1B	6.15e-05	0.934	345	0.290628
ENSP00000229319	LDHB	1.36e-05	0.938	769	0.702955
ENSP00000229328	PRKAB1	1.09e-05	0.946	805	0
ENSP00000229329	CMAS	1.97e-05	0.896	408	0.42662
ENSP00000229330	HCFC2	1.89e-05	0.73	330	0.736681
ENSP00000229332	CLEC4A	5.88e-05	0.1	347	0.610576
ENSP00000229335	AICDA	1.61e-05	0.848	660	0.807411
ENSP00000229340	RAB35	2.12e-05	0.946	688	0.367313
ENSP00000229379	COX6A1	1.09e-05	0.94	917	0.633554
ENSP00000229390	SRSF9	1.27e-05	0.944	750	0.789588
ENSP00000229395	FGFR1OP2	6.46e-05	0.954	323	0.28456
ENSP00000229402	KLRB1	2.45e-05	0.344	510	0.796754
ENSP00000229416	GCLC	3.26e-05	0.93	829	0.674046
ENSP00000229447	IYD	3.02e-05	0.218	485	0.267322
ENSP00000229563	TMEM14C	3.2e-05	0.806	191	0.513916
ENSP00000229570	SMIM8	2.45e-05	0.932	0	0.806146
ENSP00000229583	ADTRP	1.99e-05	0.924	452	0.525644
ENSP00000229595	ASF1A	2.09e-05	0.948	941	0.965498
ENSP00000229633	HINT3	0.000175304	0.932	159	0.667722
ENSP00000229708	ULBP1	6.82e-05	0.888	506	0.616533
ENSP00000229729	SLC44A4	3.44e-05	0.404	512	0.46362
ENSP00000229758	FBXO5	7.96e-05	0.314	999	0.826181
ENSP00000229769	FANCE	7.51e-05	0.932	905	0.801973
ENSP00000229771	TULP1	2.46e-05	0.556	499	0.716031
ENSP00000229794	MAPK14	1.34e-05	0.77	943	0
ENSP00000229824	RAB44	1.84e-05	0.998	702	0.651664
ENSP00000229829	HLA-DOA	5.68e-05	0.442	198	0.425419
ENSP00000229854	MCM3	2.19e-05	0.606	999	0.915449
ENSP00000229903	SAYSD1	0.00128185	0.938	0	0.903203
ENSP00000229922	CAP2	1.58e-05	0.95	655	0.696475
ENSP00000229955	GPR63	2.88e-05	0.658	476	0.73509
ENSP00000230012	HDGFL1	2.78e-05	0.884	355	0
ENSP00000230036	GPLD1	2.81e-05	0.43	742	0.261381
ENSP00000230048	ACOT13	2.23e-05	0.946	284	0.267841
ENSP00000230053	B3GAT2	2.82e-05	0.508	361	0.639868
ENSP00000230056	GMNN	6.61e-05	0.422	999	0.910337
ENSP00000230085	SNX3	2.58e-05	0.928	396	0.341732
ENSP00000230099	TRIM38	0.000136758	0.948	0	0
ENSP00000230122	ZBTB24	1.34e-05	0.924	341	0.985158
ENSP00000230124	FIG4	2.03e-05	0.888	434	0.33901
ENSP00000230256	UNC93A	4.33e-05	0.286	603	0.308836
ENSP00000230321	MDFI	2.54e-05	0.866	570	0.304562
ENSP00000230354	TBP	1.05e-05	0.936	980	0
ENSP00000230361	GUCA1B	2.59e-05	0.364	907	0.932106
ENSP00000230381	PRPH2	3.36e-05	0.396	616	0.713096
ENSP00000230419	PTK7	1.15e-05	0.926	944	0.994259
ENSP00000230431	DNPH1	2.5e-05	0.88	301	0.595292
ENSP00000230449	EXOC2	1.6e-05	0.94	935	0.524497
ENSP00000230461	TMEM30A	3.72e-05	1	582	0.361597
ENSP00000230538	LAMA4	6.39e-05	0.16	517	0.493827
ENSP00000230565	ENPP5	2.79e-05	0.93	282	0.27497
ENSP00000230568	LY86	3.15e-05	0.644	258	0.427283
ENSP00000230582	PRSS16	3.21e-05	0.26	517	0.336547
ENSP00000230588	MEP1A	5.74e-05	0.086	826	0.299294
ENSP00000230658	ISL1	2.1e-05	0.82	918	0.983857
ENSP00000230671	SLC6A7	3.54e-05	0.936	412	0.483706
ENSP00000230732	POU4F3	3.52e-05	0.164	539	0.951858
ENSP00000230792	NUDT12	1.84e-05	0.936	243	0.28106
ENSP00000230859	PAPD7	1.38e-05	0.934	506	0.834318
ENSP00000230895	DAP	2.34e-05	0.936	584	0.813921
ENSP00000231004	LOX	3.05e-05	0.484	859	0.88115
ENSP00000231009	GZMK	2.53e-05	0.466	357	0.29189
ENSP00000231021	CDH9	4.27e-05	0.952	913	0.488409
ENSP00000231061	SPARC	2.77e-05	0.544	951	0.95314
ENSP00000231121	HAND1	3.85e-05	0.02	683	0.969221
ENSP00000231130	PCDHB3	0.000155269	0.94	240	0.521779
ENSP00000231134	PCDHB5	0.000107687	0.842	241	0.424044
ENSP00000231136	PCDHB6	8.95e-05	0.322	183	0.510774
ENSP00000231137	PCDHB7	6.22e-05	0.95	374	0.400718
ENSP00000231173	PCDHB15	0.000129241	0.944	406	0.565407
ENSP00000231188	GRM6	2.79e-05	0.1	919	0.899462
ENSP00000231198	THG1L	5.93e-05	0.922	826	0.36953
ENSP00000231228	IL12B	2.61e-05	0.474	998	0.859373
ENSP00000231238	TTC1	2.41e-05	0.934	644	0.267623
ENSP00000231357	IRX4	2.56e-05	0.844	625	0.980487
ENSP00000231368	LNPEP	1.65e-05	0.942	484	0.669924
ENSP00000231420	AGXT2	2.2e-05	0.69	905	0.489667
ENSP00000231449	IL4	1.97e-05	0.864	969	0.955203
ENSP00000231454	IL5	2.84e-05	0.236	999	0.935075
ENSP00000231461	ST8SIA4	3.16e-05	0.16	561	0.636854
ENSP00000231484	PCDH12	0.000100923	0.228	281	0.510951
ENSP00000231487	SKP1	1.2e-05	0.922	966	0.941356
ENSP00000231498	NUP155	2.36e-05	0.94	443	0.760218
ENSP00000231509	NR3C1	2.11e-05	0.888	918	0.953227
ENSP00000231512	C5orf15	9.06e-05	0.95	330	0.401603
ENSP00000231524	TRIM23	1.63e-05	0.92	673	0.467938
ENSP00000231572	RARS	1.42e-05	0.924	960	0.836529
ENSP00000231668	BNIP1	3.24e-05	0.936	602	0.437457
ENSP00000231706	SLC7A14	2.24e-05	0.908	704	0.762657
ENSP00000231751	LTF	3.31e-05	0.446	915	0.611204
ENSP00000231790	MLH1	1.73e-05	0.746	999	0.874513
ENSP00000231887	EHHADH	1.31e-05	0.862	969	0.641033
ENSP00000231948	CRBN	3.49e-05	0.94	564	0.235043
ENSP00000232003	HRG	7.56e-05	0	961	0.58677
ENSP00000232014	BCL6	1.16e-05	0.928	957	0.984218
ENSP00000232219	RBP1	4.68e-05	0.572	926	0.777518
ENSP00000232375	PFKFB4	1.92e-05	0.946	948	0.436092
ENSP00000232424	HES1	3.82e-05	0.932	900	0.946069
ENSP00000232458	ECT2	4.73e-05	0.338	998	0.775796
ENSP00000232461	GNAT1	2.21e-05	0.368	990	0.989359
ENSP00000232496	TUSC2	7.85e-05	0.402	726	0.390239
ENSP00000232501	NPRL2	2.6e-05	0.922	728	0.289029
ENSP00000232508	CYB561D2	2.66e-05	0.808	793	0.443782
ENSP00000232519	C3orf14	2.71e-05	0.764	266	0.518992
ENSP00000232564	GNB4	1.15e-05	0.932	999	0.989852
ENSP00000232603	MORC1	5.74e-05	0.622	429	0.280099
ENSP00000232744	ABTB1	1.55e-05	0.904	748	0.921029
ENSP00000232766	KLHL18	2.5e-05	0.752	481	0.816411
ENSP00000232905	EIF1B	1.87e-05	0.942	284	0.635472
ENSP00000232974	ZBTB47	1.6e-05	1	418	0.987309
ENSP00000232978	NKTR	1.59e-05	0.96	496	0.653989
ENSP00000233025	SPCS1	1.59e-05	0.918	900	0.494447
ENSP00000233027	NEK4	2.69e-05	0.746	236	0.388365
ENSP00000233047	TMEM159	0.000578236	0.95	0	0.655487
ENSP00000233055	WDFY1	1.67e-05	0.946	269	0.422085
ENSP00000233057	EIF2AK2	2.13e-05	0.924	648	0.775539
ENSP00000233078	DAZAP1	3e-05	0.926	321	0.792366
ENSP00000233084	DDX1	1.04e-05	0.948	648	0.771102
ENSP00000233099	HEATR5B	3.8e-05	0.934	300	0.316514
ENSP00000233121	MAPRE3	2.33e-05	0.692	955	0.64411
ENSP00000233143	TMSB10	3.53e-05	0.928	309	0.271707
ENSP00000233146	MSH2	1.37e-05	0.91	999	0.887023
ENSP00000233154	NCK2	2.2e-05	0.916	938	0.762041
ENSP00000233156	TFPI	2.98e-05	0.778	817	0.768832
ENSP00000233202	SLC11A1	2.37e-05	0.924	678	0.620504
ENSP00000233242	APOB	2.49e-05	0.332	999	0.899561
ENSP00000233336	TTL	2.47e-05	0.934	360	0.493259
ENSP00000233379	FAHD2A	3.54e-05	0.946	422	0.640143
ENSP00000233468	SF3B14	1.63e-05	0.944	203	0
ENSP00000233535	SLC30A3	2.19e-05	0.93	674	0.357435
ENSP00000233545	MPV17	1.34e-05	0.948	589	0.264776
ENSP00000233557	NRBP1	4.02e-05	0.934	917	0.773712
ENSP00000233575	SNX17	4.84e-05	0.938	852	0.245232
ENSP00000233596	REEP6	2.34e-05	0.928	289	0.286437
ENSP00000233607	APC2	2.97e-05	0.908	398	0.826508
ENSP00000233615	WBP1	6.85e-05	0.306	191	0.552014
ENSP00000233616	MOGS	2.14e-05	0.952	878	0.3338
ENSP00000233627	NDUFS7	1.24e-05	0.932	374	0.625715
ENSP00000233630	PCGF1	3.33e-05	0.92	960	0.804335
ENSP00000233638	TLX2	5.21e-05	0.946	438	0.778502
ENSP00000233668	DOK1	4.26e-05	0.96	976	0.615047
ENSP00000233712	EVA1A	0.000161181	0.924	325	0.709872
ENSP00000233714	LANCL1	2.7e-05	0.938	411	0.313935
ENSP00000233735	REG1A	4.68e-05	0.144	749	0.342284
ENSP00000233809	IGFBP2	2.47e-05	0.46	876	0.920177
ENSP00000233813	IGFBP5	3.05e-05	0.388	833	0.906822
ENSP00000233826	KCNJ13	4.15e-05	0.042	750	0.662368
ENSP00000233838	GGCX	5.86e-05	0.862	977	0.288897
ENSP00000233840	NEU2	1.95e-05	0.67	622	0.41335
ENSP00000233893	HSPE1	1.33e-05	0.942	806	0.794359
ENSP00000233946	IL1R1	3.05e-05	0.828	992	0
ENSP00000233948	WNT6	3.06e-05	0.152	917	0.977999
ENSP00000233957	IL18R1	2.73e-05	0.508	370	0.81339
ENSP00000233969	SLC9A2	2.42e-05	0.862	750	0.488569
ENSP00000233997	AZU1	3.47e-05	0.02	608	0.714934
ENSP00000234038	PPP1R7	1.36e-05	0.956	884	0.775492
ENSP00000234040	PASK	1.12e-05	0.95	549	0.994051
ENSP00000234091	ID2	2.75e-05	0.494	845	0.97755
ENSP00000234111	ODC1	1.53e-05	0.932	965	0.677761
ENSP00000234142	GREB1	3.79e-05	0.33	703	0.446173
ENSP00000234160	GORASP2	1.48e-05	0.938	763	0.367397
ENSP00000234170	CEBPZ	1.3e-05	0.94	555	0.723561
ENSP00000234179	PRKD3	2.43e-05	0.948	400	0.545783
ENSP00000234195	RMDN2	0.00012802	0.904	487	0.310254
ENSP00000234198	DLX2	3.38e-05	0.342	836	0.985222
ENSP00000234256	SLC1A4	2.5e-05	0.818	726	0.615857
ENSP00000234296	ORC2	1.17e-05	0.932	999	0
ENSP00000234301	COX7A2L	0.000119187	0.936	205	0.639708
ENSP00000234310	PPP3R1	1.09e-05	0.928	905	0.988986
ENSP00000234313	PLEK	1.52e-05	0.93	643	0.880541
ENSP00000234347	PRTN3	2.67e-05	0.124	872	0.796027
ENSP00000234389	GRIN3B	3.24e-05	0.156	788	0.562468
ENSP00000234392	VAX2	2.97e-05	0.542	350	0.886916
ENSP00000234396	ATP6V1B1	1.29e-05	0.932	601	0.33929
ENSP00000234420	MSH6	1.42e-05	0.91	939	0.910745
ENSP00000234453	PLEKHA3	4.12e-05	0.914	551	0.236603
ENSP00000234454	SPR	6.58e-05	0.93	902	0.315748
ENSP00000234488	CLCN6	3.58e-05	0.774	485	0.511208
ENSP00000234590	ENO1	1.01e-05	0.958	806	0.801029
ENSP00000234626	CDC7	2.78e-05	0.624	995	0.895744
ENSP00000234677	SARS	1.41e-05	0.936	769	0.796868
ENSP00000234701	CLCA1	3.72e-05	0.226	800	0.469724
ENSP00000234739	BCL9	2.98e-05	0.482	750	0.688658
ENSP00000234798	TPSG1	2.3e-05	0.652	660	0.320742
ENSP00000234800	SLC35E2B	2.11e-05	0.86	501	0
ENSP00000234827	TCEANC2	1.06e-05	0.942	323	0.905439
ENSP00000234831	TMEM59	8.93e-05	0.934	200	0.426326
ENSP00000234961	OPRD1	3.09e-05	0.544	937	0.864776
ENSP00000235090	WDR77	1.46e-05	0.94	416	0.656222
ENSP00000235180	DLGAP3	4.89e-05	0.34	706	0.451694
ENSP00000235307	C1orf21	4.45e-05	0.774	157	0.798571
ENSP00000235310	MAD2L2	3.89e-05	0.792	983	0.689547
ENSP00000235329	MFN2	1.37e-05	0.932	835	0.474128
ENSP00000235332	MIIP	0.000157522	0.504	307	0.440768
ENSP00000235345	SLC35D1	3.58e-05	0.906	446	0.320265
ENSP00000235347	PRAMEF10	0.00195522	0.922	0	0.853639
ENSP00000235349	PRAMEF4	0.000305439	0.122	214	0.793241
ENSP00000235372	PRDM2	2.41e-05	0.936	610	0.931798
ENSP00000235382	RGS2	2.53e-05	0.506	961	0.813152
ENSP00000235521	WARS2	1.43e-05	0.95	587	0.656837
ENSP00000235532	OSCP1	2.76e-05	0.804	252	0.336979
ENSP00000235628	NT5C1A	1.48e-05	0.906	900	0.514178
ENSP00000235835	AKR7A2	3.65e-05	0.942	829	0.760489
ENSP00000235932	RAB7L1	4.18e-05	0.944	907	0
ENSP00000235933	CD160	1.27e-05	0.936	0	0.685773
ENSP00000236137	SLC19A2	5.49e-05	0.95	302	0.655699
ENSP00000236147	SELL	2.44e-05	0.536	906	0.894138
ENSP00000236166	FMO6P	5.75e-05	0.074	299	0
ENSP00000236192	VAMP4	1.72e-05	0.93	855	0.718755
ENSP00000236273	SYF2	2.27e-05	0.926	528	0.453339
ENSP00000236671	CTSD	1.89e-05	0.71	661	0.851568
ENSP00000236709	A4GNT	4.06e-05	0.296	476	0.781764
ENSP00000236826	MMP8	3.32e-05	0.352	913	0.959711
ENSP00000236877	SLC8A2	2.2e-05	0.818	800	0.371993
ENSP00000236959	ATIC	1.66e-05	0.958	911	0.735484
ENSP00000236979	TNP1	3.36e-05	0.376	743	0.406781
ENSP00000236980	FASTKD2	5.13e-05	0.932	469	0.353481
ENSP00000237014	TTR	2.1e-05	0.702	999	0.900976
ENSP00000237172	FILIP1	5.63e-05	0.952	300	0.447648
ENSP00000237201	SPACA1	2.35e-05	0.818	198	0.53968
ENSP00000237264	TBPL1	1.09e-05	0.914	915	0
ENSP00000237275	ZC2HC1B	6.57e-05	0.654	441	0.576566
ENSP00000237281	FBXO30	0.000431859	0.948	567	0.56916
ENSP00000237283	ADAT2	2.03e-05	0.932	550	0.529025
ENSP00000237289	TNFAIP3	2.16e-05	0.95	578	0.897039
ENSP00000237353	PMFBP1	4.26e-05	0.572	198	0.519513
ENSP00000237380	MED28	4.08e-05	0.952	416	0.825745
ENSP00000237449	DNAH6	2.68e-05	0.76	681	0.822717
ENSP00000237455	RNF103	2.97e-05	0.874	248	0.418978
ENSP00000237500	MYL12B	2.14e-05	0.666	990	0.820705
ENSP00000237527	GHRH	2.58e-05	0.156	971	0.844809
ENSP00000237530	RPN2	1.41e-05	0.938	220	0.554262
ENSP00000237536	SOGA1	6.29e-05	1	355	0.269457
ENSP00000237596	PKD2	2.48e-05	0.874	858	0.451437
ENSP00000237612	ABCG2	2.23e-05	0.546	906	0.84186
ENSP00000237642	FAM47E-STBD1	8.07e-05	0.27	158	0
ENSP00000237654	CCNI	1.9e-05	0.938	869	0.974342
ENSP00000237696	RARRES1	6.52e-05	0.222	459	0.516644
ENSP00000237822	C2orf43	4e-05	0.924	444	0
ENSP00000237837	FGF23	3.04e-05	0.124	998	0.932459
ENSP00000237853	ELL2	2.47e-05	0.946	313	0.803666
ENSP00000237858	GLRX	1.73e-05	0.94	810	0.487357
ENSP00000237889	NDUFB3	2.65e-05	0.95	313	0.663774
ENSP00000237937	ZFAND5	2.53e-05	0.944	276	0.33572
ENSP00000238018	GDA	4.84e-05	0.802	985	0.356977
ENSP00000238146	DDX55	1.18e-05	0.922	566	0.713652
ENSP00000238156	CCDC92	0.000172717	0.93	471	0.512546
ENSP00000238256	FKBP15	2.55e-05	0.942	303	0.44546
ENSP00000238341	CNTRL	5.07e-05	0.912	935	0.550816
ENSP00000238379	HDHD3	3.99e-05	0.928	465	0.339263
ENSP00000238497	VPS4B	1.84e-05	0.946	728	0.34101
ENSP00000238508	SERPINB10	2.64e-05	0.63	305	0.372894
ENSP00000238558	GSC	2.88e-05	0.584	954	0.955468
ENSP00000238561	ADCK1	1.16e-05	0.95	222	0.231455
ENSP00000238609	IFI27L2	2.76e-05	0.92	301	0.549395
ENSP00000238616	NEK9	1.96e-05	0.948	970	0.464607
ENSP00000238618	ACYP1	5.02e-05	0.944	195	0.317945
ENSP00000238628	IFT43	3.37e-05	0.946	581	0.859089
ENSP00000238647	IRF2BPL	0.000114419	0.944	347	0.484005
ENSP00000238651	ACOT2	2.94e-05	0.926	392	0.559877
ENSP00000238667	FLVCR2	2.5e-05	0.766	245	0.306852
ENSP00000238682	TGFB3	3.35e-05	0.608	957	0.977352
ENSP00000238714	PAPOLG	1.15e-05	0.936	391	0.678225
ENSP00000238721	TP53I3	1.8e-05	0.952	698	0.45062
ENSP00000238788	TMEM214	3.03e-05	0.922	900	0.385917
ENSP00000238789	ATAD2B	1e-05	0.956	779	0.783494
ENSP00000238823	FAM98A	5.1e-05	0.942	225	0.391405
ENSP00000238831	YIPF4	5.06e-05	0.95	360	0.517604
ENSP00000238855	AFTPH	3.87e-05	0.946	360	0.339912
ENSP00000238875	LGALSL	7.2e-05	0.938	329	0.422465
ENSP00000238892	CRIPT	4.31e-05	0.924	501	0.343994
ENSP00000238936	TMEM180	0.000201277	0.948	242	0.675132
ENSP00000238994	PPP1R3C	4.04e-05	0.954	911	0.314209
ENSP00000239032	PRLHR	4.22e-05	0.164	609	0.588383
ENSP00000239144	HOXB8	2.79e-05	0.292	504	0.972752
ENSP00000239151	HOXB5	3.51e-05	0.568	759	0.977896
ENSP00000239165	HOXB7	2.59e-05	0.282	871	0.982303
ENSP00000239223	DUSP1	1.91e-05	0.938	856	0.931862
ENSP00000239231	PANK3	8e-05	0.934	446	0.27384
ENSP00000239243	MSX2	2.84e-05	0.344	963	0.98535
ENSP00000239316	INSL4	3.05e-05	0.724	750	0.383452
ENSP00000239347	IFNA7	3.34e-05	0.678	800	0.697539
ENSP00000239367	LRP11	0.000149753	0.944	279	0.433568
ENSP00000239374	CCDC170	2.49e-05	0.462	301	0.317208
ENSP00000239440	ARAP3	1.67e-05	0.93	914	0.636545
ENSP00000239444	PCDHB8	4.68e-05	0.684	183	0.530788
ENSP00000239446	PCDHB10	0.000127405	0.866	312	0.462101
ENSP00000239449	PCDHB14	0.000126217	0.942	218	0.466899
ENSP00000239450	PCDHB12	6.92e-05	0.324	330	0.543436
ENSP00000239451	SLC25A2	2.63e-05	0.832	906	0.278931
ENSP00000239461	PRRX1	2.76e-05	0.312	806	0.968742
ENSP00000239462	TNN	2.25e-05	0.352	806	0.484019
ENSP00000239587	TTLL2	2.49e-05	0.686	305	0.630378
ENSP00000239614	MSANTD2	5.93e-05	0.476	345	0.566545
ENSP00000239666	PDZD11	6.32e-05	0.928	747	0.404261
ENSP00000239690	NUDCD1	5.45e-05	0.92	468	0.323111
ENSP00000239730	-	3.42e-05	0.938	337	0
ENSP00000239830	CCDC77	7.42e-05	0.944	198	0.600737
ENSP00000239878	UFM1	5.92e-05	0.94	207	0.291997
ENSP00000239882	ELF1	4.43e-05	0.928	893	0.925869
ENSP00000239891	ALG5	1.61e-05	0.954	564	0.644197
ENSP00000239906	FAM53C	3.6e-05	0.802	330	0.671438
ENSP00000239926	MYOT	6.28e-05	0.46	653	0.652034
ENSP00000239938	EGR1	1.96e-05	0.638	913	0.971063
ENSP00000239940	PFN2	1.31e-05	0.938	767	0.701204
ENSP00000239944	SERP1	1.99e-05	0.918	900	0.227001
ENSP00000240050	MTERFD3	3.01e-05	0.934	391	0
ENSP00000240055	NFYB	1.09e-05	0.958	790	0
ENSP00000240079	CCDC53	2.3e-05	0.874	535	0.326974
ENSP00000240093	FZD3	3.04e-05	0.246	960	0.925372
ENSP00000240100	DUSP4	1.97e-05	0.716	832	0.902789
ENSP00000240123	SORBS3	2.3e-05	0.744	900	0.388426
ENSP00000240185	TARDBP	1.7e-05	0.948	565	0.753571
ENSP00000240189	PRAMEF2	0.00612404	0.948	0	0.830928
ENSP00000240285	RDH10	3.23e-05	0.942	420	0.799108
ENSP00000240304	LUC7L3	2.25e-05	0.938	503	0.728881
ENSP00000240306	DLX4	3.89e-05	0.058	943	0.96869
ENSP00000240316	COIL	1.97e-05	0.94	749	0.750929
ENSP00000240327	SPOP	2.06e-05	0.928	762	0.851936
ENSP00000240328	TBX2	2.69e-05	0.132	896	0.98879
ENSP00000240333	SLC35B1	2.18e-05	0.85	302	0.373077
ENSP00000240343	DYNLL2	2.66e-05	0.842	929	0
ENSP00000240361	TEX14	1.74e-05	0.83	950	0.536985
ENSP00000240364	FAM117A	1.55e-05	0.904	161	0.507596
ENSP00000240499	ZNF141	1.73e-05	0.936	341	0.971356
ENSP00000240587	TSHZ3	9.21e-05	0.684	499	0.492133
ENSP00000240615	TAS2R8	3.18e-05	0.776	163	0.546863
ENSP00000240617	PLBD1	6.61e-05	0.924	200	0.46768
ENSP00000240618	KLRK1	2.47e-05	0.526	418	0
ENSP00000240619	TAS2R10	2.32e-05	0.84	191	0.456651
ENSP00000240651	PYROXD1	9.91e-05	0.958	227	0.435507
ENSP00000240652	IAPP	4.01e-05	0.142	937	0.820712
ENSP00000240662	KCNJ8	3.89e-05	0.154	709	0.767841
ENSP00000240687	TAS2R7	5.36e-05	0.73	0	0.844465
ENSP00000240691	TAS2R9	3.54e-05	0.806	0	0.592041
ENSP00000240731	ZNF211	1.6e-05	0.946	341	0.994815
ENSP00000240851	TFG	3.69e-05	0.818	681	0.763669
ENSP00000240874	KALRN	2.11e-05	0.418	967	0.773398
ENSP00000240922	NAA50	1.62e-05	0.952	472	0.560678
ENSP00000240986	GJA8	2.48e-05	0.744	619	0
ENSP00000241014	MAPK8IP1	2.2e-05	0.706	605	0.839832
ENSP00000241041	PEX16	2.43e-05	0.852	188	0.436595
ENSP00000241051	DEPDC7	3.5e-05	0.928	900	0.486842
ENSP00000241052	CAT	1.35e-05	0.834	962	0.913144
ENSP00000241125	GJA3	3.8e-05	0.896	905	0.367049
ENSP00000241256	GHSR	3.63e-05	0.118	963	0.869939
ENSP00000241261	TNFSF10	1.74e-05	0.734	635	0.928144
ENSP00000241305	CPXM2	4.66e-05	0.148	330	0.486226
ENSP00000241312	CSMD2	4.1e-05	0.206	361	0.473307
ENSP00000241337	GSTM2	5.23e-05	0.756	956	0.773072
ENSP00000241416	ACVR2A	4.12e-05	0.534	971	0.935149
ENSP00000241436	POLK	1.99e-05	0.908	633	0.813025
ENSP00000241453	FLT3	1.19e-05	0.942	848	0.990696
ENSP00000241463	RASL11A	1.04e-05	0.932	871	0.984284
ENSP00000241502	FYTTD1	5.42e-05	0.946	285	0.466361
ENSP00000241527	MTERFD2	5.69e-05	0.95	286	0
ENSP00000241651	MYOG	2.48e-05	0.55	934	0.982309
ENSP00000241808	PRM2	2.08e-05	0.688	535	0.357847
ENSP00000242057	AHR	2.94e-05	0.896	989	0.933322
ENSP00000242067	BBS9	2.61e-05	0.79	394	0.320011
ENSP00000242104	OCM	1.11e-05	0.944	575	0
ENSP00000242108	EEPD1	3.86e-05	0.938	406	0.297119
ENSP00000242109	KIAA0087	1.74e-05	0.88	0	0
ENSP00000242152	NPY	2.17e-05	0.29	990	0.921182
ENSP00000242159	HOXA7	3.07e-05	0.592	844	0.978943
ENSP00000242208	INHBA	3.31e-05	0.1	917	0.966074
ENSP00000242209	FKBP9	1.46e-05	0.938	258	0.471369
ENSP00000242210	NT5C3A	3.54e-05	0.92	900	0.671549
ENSP00000242248	POLM	2.27e-05	0.502	459	0.65899
ENSP00000242261	TWIST1	2.44e-05	0.74	913	0.984232
ENSP00000242275	SLC25A51	1.16e-05	0.948	176	0.451072
ENSP00000242285	CLTA	1.95e-05	0.952	921	0.38751
ENSP00000242351	ZC3HAV1	6.92e-05	0.946	478	0.34438
ENSP00000242375	AKR1D1	1.9e-05	0.93	954	0.515614
ENSP00000242462	NEUROG3	2.74e-05	0.25	993	0.958198
ENSP00000242465	SRGN	3.03e-05	0.424	967	0.490501
ENSP00000242480	EGR2	1.67e-05	0.69	908	0.990957
ENSP00000242505	FAM149B1	4.39e-05	0.756	294	0.514386
ENSP00000242576	UNG	2.08e-05	0.71	801	0.78326
ENSP00000242577	DYNLL1	2.16e-05	0.85	935	0.615943
ENSP00000242591	IFT81	5.07e-05	0.938	377	0.335279
ENSP00000242592	ACADS	1.26e-05	0.922	653	0.751468
ENSP00000242607	HVCN1	5.48e-05	0.786	900	0.248267
ENSP00000242719	RNF11	1.4e-05	0.946	260	0.668456
ENSP00000242728	BHLHE41	1.66e-05	0.924	433	0.925514
ENSP00000242729	SSPN	5.06e-05	0.158	957	0.366266
ENSP00000242784	C19orf43	0.000133071	0.938	0	0.678989
ENSP00000242786	CD97	3.07e-05	0.868	360	0
ENSP00000242796	WDR83	4.2e-05	0.94	381	0
ENSP00000242804	ZNF442	1.77e-05	0.93	349	0.995696
ENSP00000242810	KLHL24	7.39e-05	0.93	405	0.398358
ENSP00000242819	CCDC70	4.88e-05	0.608	234	0.748907
ENSP00000242827	EBPL	2.42e-05	0.874	398	0.387969
ENSP00000242839	ATP7B	1.98e-05	0.932	895	0.583074
ENSP00000242872	CENPK	9.17e-05	0.254	982	0.852422
ENSP00000242994	NEUROD4	5.2e-05	0.072	499	0.944135
ENSP00000243045	ORMDL2	3.79e-05	0.932	290	0.341697
ENSP00000243052	PDE1B	1.89e-05	0.926	942	0.583324
ENSP00000243077	LRP1	4.82e-05	0.22	992	0.859327
ENSP00000243103	HOXC12	3.03e-05	0.228	645	0.918027
ENSP00000243108	HOXC6	3.95e-05	0.674	841	0.969377
ENSP00000243167	FAAH	1.46e-05	0.856	532	0.308708
ENSP00000243189	C1orf63	4.18e-05	0.708	198	0
ENSP00000243213	IL13RA2	9.48e-05	0.068	0	0.668507
ENSP00000243286	TCEAL3	3.3e-05	0.824	294	0.555403
ENSP00000243298	RAB9B	1.34e-05	0.948	505	0.521844
ENSP00000243314	MAGEA9B	5.86e-05	0.582	298	0
ENSP00000243326	RIF1	5.22e-05	0.822	862	0.73472
ENSP00000243344	TTC21B	4.76e-05	0.908	206	0.416814
ENSP00000243346	NMI	4.49e-05	0.938	900	0.545321
ENSP00000243347	TNFAIP6	2.51e-05	0.592	846	0.81773
ENSP00000243349	ACVR1C	3.5e-05	0.32	766	0.941473
ENSP00000243389	SLC36A1	2.57e-05	0.92	426	0.513097
ENSP00000243440	BATF3	1.44e-05	0.876	692	0
ENSP00000243457	KCNJ2	2.82e-05	0.194	907	0.779328
ENSP00000243501	PLA2G12A	2.9e-05	0.682	900	0.807246
ENSP00000243563	SNRPA	1.4e-05	0.966	916	0.866784
ENSP00000243578	B9D2	3.85e-05	0.37	915	0.639278
ENSP00000243611	C4BPB	4.79e-05	0.882	902	0.503649
ENSP00000243643	ZNF415	1.7e-05	0.934	341	0.992807
ENSP00000243644	ZNF350	1.76e-05	1	451	0.970976
ENSP00000243662	RAB38	2.96e-05	0.904	813	0.419124
ENSP00000243673	GPR83	1.86e-05	0.748	910	0.392147
ENSP00000243706	HAUS3	3.83e-05	0.932	360	0.30202
ENSP00000243776	CHPF	3.03e-05	0.926	533	0.399749
ENSP00000243786	INHA	3.23e-05	0.098	922	0.961066
ENSP00000243878	ENKD1	1.15e-05	0.94	900	0.426634
ENSP00000243896	SLC35C2	3.16e-05	0.962	267	0.329515
ENSP00000243903	ACTR5	2.56e-05	0.95	725	0.453058
ENSP00000243911	MC3R	3.63e-05	0.098	988	0.863443
ENSP00000243913	GCNT7	2.47e-05	0.648	592	0.546072
ENSP00000243914	CTCFL	1.32e-05	0.942	878	0.964151
ENSP00000243918	SYS1	2.69e-05	0.93	210	0.331507
ENSP00000243924	PI3	2e-05	0.22	757	0.906824
ENSP00000243997	ATP5E	1.43e-05	0.936	748	0.64019
ENSP00000244007	PLCG1	1.84e-05	0.878	986	0.889059
ENSP00000244020	SRSF6	1.14e-05	0.952	917	0.799877
ENSP00000244040	RAB22A	1.68e-05	0.94	512	0.571728
ENSP00000244043	PTGIS	3.36e-05	0.67	966	0.61866
ENSP00000244050	SNAI1	2.45e-05	0.658	947	0.986189
ENSP00000244051	MOCS3	1.08e-05	0.934	533	0.560093
ENSP00000244061	RNF114	2.96e-05	0.94	499	0.369248
ENSP00000244096	MAGEA10	7.17e-05	0.752	298	0.316681
ENSP00000244137	PEPD	1.52e-05	0.822	502	0.710258
ENSP00000244174	IL9R	2.93e-05	0.404	822	0.781932
ENSP00000244217	MCEE	2.31e-05	0.954	414	0.368319
ENSP00000244221	PAIP2B	2.84e-05	0.948	751	0.377476
ENSP00000244227	SNRNP27	4.2e-05	0.952	0	0.324577
ENSP00000244241	IL17C	2.44e-05	0.744	305	0.547264
ENSP00000244289	LIPE	2.29e-05	0.912	969	0.472689
ENSP00000244314	IRGC	4.6e-05	0.354	596	0.358534
ENSP00000244360	RNF39	2.88e-05	0.956	605	0.832372
ENSP00000244364	DST	2.51e-05	0.644	996	0.604883
ENSP00000244426	FBXO9	2.06e-05	0.928	242	0.312635
ENSP00000244496	RRP36	1.23e-05	0.928	520	0.692436
ENSP00000244513	BTN1A1	1.97e-05	0.732	814	0.523461
ENSP00000244519	BTN3A3	6.12e-05	0.944	234	0.441518
ENSP00000244520	SNRPC	2.02e-05	0.938	561	0.771899
ENSP00000244527	SLC17A1	3.05e-05	0.484	523	0.488892
ENSP00000244537	HIST1H4G	2.01e-05	0.906	774	0
ENSP00000244571	AARS2	1.09e-05	0.948	724	0.687578
ENSP00000244573	HIST1H1A	3.45e-05	0.884	999	0.908017
ENSP00000244576	ZNF391	2.05e-05	0.944	350	0.996628
ENSP00000244601	HIST1H2BG	1.81e-05	0.884	907	0
ENSP00000244625	TBCC	2.71e-05	0.8	905	0
ENSP00000244661	HIST1H3B	1.81e-05	0.872	926	0
ENSP00000244669	APOBEC2	6.68e-05	0.074	627	0.514952
ENSP00000244709	TREM1	9.16e-05	0.798	407	0.616521
ENSP00000244711	MEA1	2.99e-05	0.894	307	0.416581
ENSP00000244728	COL21A1	4.16e-05	0.29	916	0.502805
ENSP00000244741	CDKN1A	1.77e-05	0.824	999	0
ENSP00000244745	SOX4	4.74e-05	0.884	751	0.966817
ENSP00000244751	CPNE5	4.37e-05	0.83	383	0.424142
ENSP00000244763	SSR1	3.15e-05	0.952	214	0.550427
ENSP00000244766	NRN1	2.54e-05	0.926	384	0.530637
ENSP00000244769	ATXN1	1.5e-05	0.946	524	0.839422
ENSP00000244869	EREG	3.39e-05	0.066	980	0.939947
ENSP00000244926	SCGB1D2	0.000212578	0.818	329	0.741827
ENSP00000244930	SCGB2A1	8.61e-05	0.58	624	0.456179
ENSP00000245046	EMC3	3.96e-05	0.85	581	0.385019
ENSP00000245105	SH3TC1	4.05e-05	0.434	503	0.380271
ENSP00000245121	KATNAL2	1.98e-05	0.63	514	0.343738
ENSP00000245157	BBS2	3.16e-05	0.678	561	0.685694
ENSP00000245185	MT2A	3.71e-05	0.872	440	0.334984
ENSP00000245206	GOT2	2.28e-05	0.924	936	0.666478
ENSP00000245222	SPHK2	2.34e-05	0.948	941	0.462228
ENSP00000245255	PIWIL1	2.48e-05	0.942	471	0.757693
ENSP00000245312	SLC10A2	3.83e-05	0.7	767	0.628552
ENSP00000245323	EFNB2	3.21e-05	0.36	928	0.947776
ENSP00000245407	SLC22A5	3.64e-05	0.942	596	0.520428
ENSP00000245414	IRF1	1.6e-05	0.904	925	0.922922
ENSP00000245451	BMP4	4.11e-05	0.388	993	0
ENSP00000245457	PTGER2	3.4e-05	0.216	918	0.787031
ENSP00000245479	SOX9	3.34e-05	0.522	967	0.99225
ENSP00000245541	GGA3	2.46e-05	0.65	472	0
ENSP00000245543	ARMC7	2.54e-05	0.83	302	0.523761
ENSP00000245544	NUP85	2.01e-05	0.926	936	0.721992
ENSP00000245551	MIF4GD	1.83e-05	0.896	150	0.525569
ENSP00000245552	NT5C	1.88e-05	0.862	900	0.530926
ENSP00000245564	MSTO1	5.77e-05	0.876	606	0.329131
ENSP00000245615	MBOAT7	2.83e-05	0.836	223	0.353606
ENSP00000245620	LILRB3	1.54e-05	0.846	0	0.919048
ENSP00000245663	ZBTB46	1.86e-05	0.92	341	0.989186
ENSP00000245680	SLC35F5	2.5e-05	0.952	534	0.290168
ENSP00000245787	INSIG2	1.98e-05	0.942	756	0.610739
ENSP00000245796	PSD4	1.89e-05	0.932	233	0.417968
ENSP00000245810	PSPN	6.69e-05	0.254	969	0.598028
ENSP00000245812	ALKBH7	1.6e-05	0.912	177	0.328442
ENSP00000245816	CLPP	1.74e-05	0.904	603	0.810421
ENSP00000245817	TNFSF9	6.95e-05	0.93	501	0.692195
ENSP00000245838	THOC2	1.72e-05	0.946	480	0.784252
ENSP00000245903	CD70	9.36e-05	0.944	440	0.788118
ENSP00000245907	C3	2.73e-05	0.316	998	0.86177
ENSP00000245908	SH2D3A	5.93e-05	0.94	358	0.461704
ENSP00000245923	RTN2	1.07e-05	0.932	788	0.171871
ENSP00000245932	VASP	2.7e-05	0.892	978	0.83519
ENSP00000245934	SYMPK	2.26e-05	0.942	503	0.521315
ENSP00000245960	CDC25B	2.91e-05	0.96	997	0.964959
ENSP00000245983	GNRH2	3.9e-05	0.098	954	0.884884
ENSP00000246000	-	8.77e-05	0.63	181	0
ENSP00000246012	CST8	1.64e-05	0.828	311	0.653444
ENSP00000246020	CSTL1	0.00017821	0.528	252	0.431041
ENSP00000246024	TMX4	5.43e-05	0.884	379	0.422372
ENSP00000246041	AP5S1	4.52e-05	0.942	360	0.339002
ENSP00000246069	DSTN	1.4e-05	0.904	727	0.670352
ENSP00000246070	LAMP5	8.71e-05	0.006	242	0.546773
ENSP00000246071	SNRPB2	1.66e-05	0.928	391	0.765274
ENSP00000246080	TCF15	3.58e-05	0.096	566	0.906973
ENSP00000246081	OTOR	3.28e-05	0.788	204	0.355623
ENSP00000246100	FAM110A	4.09e-05	0.662	378	0.417935
ENSP00000246104	SCRT2	2.45e-05	0.602	349	0.916686
ENSP00000246105	DEFB129	4.64e-05	0.462	216	0.608699
ENSP00000246112	TLE6	2.14e-05	0.77	668	0.952166
ENSP00000246115	S1PR4	3.76e-05	0.074	919	0.952821
ENSP00000246117	NCLN	3.17e-05	0.942	472	0.338403
ENSP00000246151	PITHD1	9.95e-05	0.932	0	0.422744
ENSP00000246166	FNTB	2.37e-05	0.956	900	0.363789
ENSP00000246174	ARMCX5	3.18e-05	0.928	163	0.609949
ENSP00000246186	MMP24	3.9e-05	0.144	711	0.804304
ENSP00000246190	NECAB3	5.64e-05	0.938	947	0.397426
ENSP00000246194	RALY	1.22e-05	0.934	532	0.801394
ENSP00000246229	PLAGL2	1.42e-05	0.93	418	0.976733
ENSP00000246337	UROD	1.35e-05	0.896	680	0.660705
ENSP00000246421	SLC35E2	7.27e-05	0.964	242	0.288616
ENSP00000246515	SLURP1	2.66e-05	0.446	390	0.318099
ENSP00000246529	LRFN3	1.62e-05	0.932	601	0.928743
ENSP00000246532	IGFLR1	1.7e-05	0.892	720	0.540591
ENSP00000246533	CAPNS1	1.81e-05	0.942	406	0.357147
ENSP00000246535	PDCD2L	1.53e-05	0.944	594	0.540071
ENSP00000246549	FFAR2	3.8e-05	0.084	903	0.87808
ENSP00000246551	HCST	6.31e-05	0.942	277	0.585783
ENSP00000246553	FFAR1	3.95e-05	0.07	912	0.889488
ENSP00000246554	COX6B1	2.02e-05	0.958	822	0.662167
ENSP00000246635	KRT13	6.66e-05	0.692	296	0.551378
ENSP00000246646	KRT38	5.89e-05	0.456	299	0.554161
ENSP00000246657	CCR7	2.47e-05	0.51	985	0.934641
ENSP00000246662	KRT9	4.65e-05	0.904	579	0.404054
ENSP00000246672	NR1D1	3.3e-05	0.922	913	0.903554
ENSP00000246747	ARL2	4.23e-05	0.936	927	0.355262
ENSP00000246785	BCL2L12	4.25e-05	0.958	175	0.370374
ENSP00000246792	RRAS	1.13e-05	0.93	941	0.979567
ENSP00000246794	PRRG2	1.94e-05	0.89	357	0.289213
ENSP00000246801	TSKS	4.12e-05	0.584	619	0.431646
ENSP00000246802	GLTSCR2	1.24e-05	0.938	548	0.674076
ENSP00000246841	FLRT1	1.75e-05	0.708	353	0.759822
ENSP00000246868	SBDS	1.67e-05	0.938	418	0.600199
ENSP00000246891	CSN1S1	2.54e-05	0.49	626	0.508472
ENSP00000246895	STATH	2.15e-05	0.36	659	0.588638
ENSP00000246896	HTN1	7.16e-05	0.068	649	0.474807
ENSP00000246912	MLX	2.7e-05	0.936	282	0.888058
ENSP00000246914	WNK4	3.61e-05	0.774	398	0.468521
ENSP00000246949	DNASE1	2.01e-05	0.526	361	0.855929
ENSP00000246957	TRAP1	1.33e-05	0.928	819	0.684718
ENSP00000247001	SUGP1	1.89e-05	0.944	441	0.69834
ENSP00000247005	GDF1	3.93e-05	0.824	831	0.977188
ENSP00000247020	SDF2	5.3e-05	0.102	487	0.390642
ENSP00000247026	NSRP1	4.43e-05	0.966	153	0.398509
ENSP00000247087	AHDC1	0.000148441	0.956	204	0.431516
ENSP00000247138	SLC35A2	2.06e-05	0.734	715	0.444735
ENSP00000247161	ELK1	5.45e-05	0.662	803	0.863141
ENSP00000247170	DAAM1	1.72e-05	0.8	863	0
ENSP00000247178	ATG14	4.49e-05	0.93	185	0.248632
ENSP00000247207	HSPA2	1.4e-05	0.93	914	0.950608
ENSP00000247219	TBPL2	1.11e-05	0.938	939	0
ENSP00000247225	SGPP1	5.55e-05	0.932	926	0.247957
ENSP00000247226	PLEKHG3	0.000106705	0.918	254	0.427774
ENSP00000247270	EVI2A	5.35e-05	0.928	313	0.303281
ENSP00000247271	OMG	1.8e-05	0.82	587	0.863773
ENSP00000247306	CTAG2	0.0133067	0.938	0	0.790005
ENSP00000247461	CANX	1.59e-05	0.954	998	0.688224
ENSP00000247470	PYCARD	2.57e-05	0.898	984	0.832806
ENSP00000247584	HIVEP3	1.57e-05	0.948	373	0.988385
ENSP00000247655	COX7C	2.32e-05	0.958	968	0.682811
ENSP00000247665	PHPT1	2.71e-05	0.952	940	0.289076
ENSP00000247668	TRAF2	2.23e-05	0.954	980	0.838277
ENSP00000247706	ABHD8	5.95e-05	0.412	261	0.709403
ENSP00000247712	MPV17L2	7.48e-05	0.942	0	0
ENSP00000247815	HELB	2.5e-05	0.93	587	0.842292
ENSP00000247829	TSPAN8	2.88e-05	0.392	313	0.602068
ENSP00000247843	YEATS4	1.35e-05	0.944	776	0.963677
ENSP00000247866	NDUFB2	1.75e-05	0.864	305	0.623689
ENSP00000247879	TAS2R3	5.88e-05	0.002	900	0.968449
ENSP00000247881	TAS2R4	3.53e-05	0.272	909	0.956897
ENSP00000247883	TAS2R5	5.5e-05	0.09	900	0.970128
ENSP00000247930	ZNF777	1.54e-05	0.928	341	0.994825
ENSP00000247933	IDUA	3.89e-05	0.442	909	0.418999
ENSP00000247956	ZNF317	1.14e-05	0.944	341	0.983187
ENSP00000247970	PIN1	1.64e-05	0.86	970	0.716852
ENSP00000247977	FBXL12	4.76e-05	0.934	282	0.293431
ENSP00000247986	KIF17	2.13e-05	0.938	979	0.723921
ENSP00000247992	PLA2G2C	2.44e-05	0.828	915	0.861625
ENSP00000248041	CYP4F11	3.96e-05	0.878	451	0.893517
ENSP00000248070	EPS15L1	1.87e-05	0.95	919	0.526398
ENSP00000248071	KLF2	1.94e-05	0.942	910	0.975497
ENSP00000248076	F2RL3	4.43e-05	0.098	908	0.877971
ENSP00000248089	HCFC1R1	1.01e-05	0.934	0	0.720318
ENSP00000248098	HN1L	0.000164144	0.912	230	0.640975
ENSP00000248114	GFER	1.59e-05	0.934	398	0.516342
ENSP00000248139	RAB40C	1.78e-05	0.934	758	0.644861
ENSP00000248150	GNG13	3.33e-05	0.24	954	0.786701
ENSP00000248211	ZNF10	1.71e-05	1	341	0.99372
ENSP00000248244	TICAM1	2.32e-05	0.938	212	0.792858
ENSP00000248248	MON1B	1.33e-05	0.94	505	0.24331
ENSP00000248272	GAN	3.46e-05	0.952	404	0
ENSP00000248306	METTL25	4.58e-05	0.392	345	0.691205
ENSP00000248342	EIF3K	1.4e-05	0.932	610	0.719832
ENSP00000248378	EMC6	2.71e-05	0.958	245	0.441287
ENSP00000248420	CACTIN	2.18e-05	0.942	369	0.39827
ENSP00000248437	TUBA4A	1.53e-05	0.944	979	0.86759
ENSP00000248450	AAMP	1.5e-05	0.948	509	0.586973
ENSP00000248553	HSPB1	2.11e-05	0.948	901	0.969559
ENSP00000248564	GNG11	3.16e-05	0.412	988	0.767993
ENSP00000248566	SHFM1	2.01e-05	0.942	902	0.741118
ENSP00000248594	PTPN12	1.98e-05	0.92	634	0.83605
ENSP00000248598	FGL2	4.42e-05	0.346	303	0.370408
ENSP00000248600	STYXL1	1.93e-05	0.752	547	0.970705
ENSP00000248633	PEX1	1.29e-05	0.942	520	0.526737
ENSP00000248643	MTERF	1.8e-05	0.932	391	0
ENSP00000248668	LRFN1	1.71e-05	0.928	587	0.911557
ENSP00000248673	ZFP36	2.51e-05	0.934	879	0
ENSP00000248846	TUBGCP6	2.5e-05	0.904	955	0.570013
ENSP00000248879	DGCR6L	1.74e-05	0.82	231	0.490046
ENSP00000248901	CYTH4	2.54e-05	0.864	900	0.386376
ENSP00000248923	GGT1	2.1e-05	0.632	968	0.886286
ENSP00000248929	SGSM3	1.74e-05	0.934	614	0.428621
ENSP00000248933	SEZ6L	3.97e-05	0.244	398	0.443066
ENSP00000248935	GSTT1	1.72e-05	0.758	993	0
ENSP00000248958	SDF2L1	6.71e-05	0.78	596	0.411054
ENSP00000248975	YWHAH	1e-05	0.924	988	0.98876
ENSP00000248984	C22orf24	2.67e-05	0.926	0	0
ENSP00000248996	GNAZ	1.37e-05	0.936	998	0
ENSP00000249005	A4GALT	2.68e-05	0.77	506	0.367692
ENSP00000249007	RFPL3	2.89e-05	0.934	396	0.8275
ENSP00000249014	CDC42EP1	0.000195478	0.956	241	0.505073
ENSP00000249041	GALR3	4.9e-05	0.004	996	0.967013
ENSP00000249042	TST	1.69e-05	0.89	846	0.569441
ENSP00000249044	APOL5	2.76e-05	0.702	211	0.402932
ENSP00000249064	CCDC117	6.28e-05	0.932	215	0.535403
ENSP00000249066	APOL2	4.57e-05	0.91	284	0.511229
ENSP00000249071	RAC2	1.05e-05	0.944	965	0.980535
ENSP00000249075	LIF	4.84e-05	0.078	920	0.788159
ENSP00000249079	C22orf23	6.36e-05	0.572	574	0.610087
ENSP00000249116	APOBEC3A	1.04e-05	0.934	0	0.578331
ENSP00000249269	PMPCB	1.1e-05	0.948	817	0.570778
ENSP00000249284	TAS2R16	4.88e-05	0.424	954	0.950967
ENSP00000249299	NAA38	1.06e-05	0.938	373	0.367089
ENSP00000249344	STRIP2	2.68e-05	0.95	498	0.251758
ENSP00000249356	DNAJB9	2.5e-05	0.952	811	0.374248
ENSP00000249363	LRRC4	1.3e-05	0.928	642	0.910888
ENSP00000249373	SMO	2.74e-05	0.304	983	0.917417
ENSP00000249389	OPN1SW	1.9e-05	0.954	468	0.535215
ENSP00000249396	SIRT2	1.66e-05	0.932	962	0.944274
ENSP00000249440	HOXD3	3.1e-05	0.234	859	0.966653
ENSP00000249442	MTX2	3.02e-05	0.946	371	0.426151
ENSP00000249499	HOXD9	3.66e-05	0.312	791	0.973153
ENSP00000249501	HOXD10	3.19e-05	0.206	671	0.965205
ENSP00000249504	HOXD11	3.58e-05	0.07	844	0.968518
ENSP00000249598	GDF2	3.77e-05	0.11	405	0
ENSP00000249601	ARHGAP22	2.03e-05	0.892	909	0.516324
ENSP00000249636	PIAS1	1.83e-05	0.934	923	0.962305
ENSP00000249647	SNAP23	3.34e-05	0.928	993	0.629173
ENSP00000249700	TMOD2	7.69e-05	0.87	754	0.393427
ENSP00000249749	DLL4	3.98e-05	0.936	509	0.935456
ENSP00000249750	ALDH1A2	2.28e-05	0.434	941	0.647192
ENSP00000249776	KNSTRN	0.000105036	0.054	987	0.684721
ENSP00000249806	CLN6	4.36e-05	0.948	517	0.294156
ENSP00000249822	ARPP19	6.76e-05	0.938	903	0.338065
ENSP00000249842	ISLR	1.68e-05	0.944	601	0.939353
ENSP00000249861	THAP10	0.000158742	0.946	392	0.562329
ENSP00000249883	AMOTL2	3.75e-05	0.922	313	0.282423
ENSP00000249910	MBD4	3.34e-05	0.908	627	0.84406
ENSP00000249923	COPB1	1.5e-05	0.952	808	0.482095
ENSP00000250003	MYOD1	2.37e-05	0.606	956	0
ENSP00000250018	TPH1	1.91e-05	0.856	832	0.722263
ENSP00000250056	FAM64A	8.11e-05	0.38	359	0.537592
ENSP00000250066	USP6	1.17e-05	0.954	398	0.4667
ENSP00000250076	ZNF232	1.81e-05	0.942	341	0.992259
ENSP00000250092	CD68	2.96e-05	0.08	880	0.926644
ENSP00000250101	TXNDC17	5.3e-05	0.92	762	0.257558
ENSP00000250111	ATP1B2	3.7e-05	0.75	968	0.425856
ENSP00000250113	FXR2	2.55e-05	0.936	751	0.614966
ENSP00000250124	MPDU1	3.35e-05	0.95	416	0.292934
ENSP00000250151	CCL4	3.37e-05	0.426	926	0
ENSP00000250156	MRM1	1.23e-05	0.936	459	0
ENSP00000250160	WISP1	5.43e-05	0.184	787	0.66379
ENSP00000250173	LRRC6	1.9e-05	0.904	869	0.749133
ENSP00000250237	QTRT1	1.59e-05	0.944	199	0.484203
ENSP00000250244	AP1M2	1.88e-05	0.926	905	0.490905
ENSP00000250263	ERI1	2.69e-05	0.96	498	0.542221
ENSP00000250340	CLEC11A	0.000153583	0.96	211	0.398272
ENSP00000250351	KLK12	2.52e-05	0.614	198	0.551674
ENSP00000250366	KLK9	3.24e-05	0.432	196	0
ENSP00000250378	CMA1	2.87e-05	0.14	973	0.772108
ENSP00000250405	BCL2L2	1.44e-05	0.94	834	0.768345
ENSP00000250416	PARP2	1.88e-05	0.918	771	0.827361
ENSP00000250448	FOXA1	2.08e-05	0.798	974	0
ENSP00000250454	EAPP	9.11e-05	0.938	384	0.54254
ENSP00000250457	EGLN3	1.65e-05	0.954	998	0.795696
ENSP00000250498	DAD1	2.51e-05	0.938	351	0.305862
ENSP00000250559	RAP1B	1.06e-05	0.948	933	0.987074
ENSP00000250615	AANAT	1.77e-05	0.776	865	0.340928
ENSP00000250617	ARHGEF6	2.82e-05	0.872	928	0.639308
ENSP00000250699	CHRNA10	4.13e-05	0.376	289	0.339938
ENSP00000250823	VCY1B	1.87e-05	0.912	454	0.690569
ENSP00000250825	VCY	9.53e-05	0.916	0	0.928004
ENSP00000250831	RBMY1J	1.38e-05	0.924	0	0.930511
ENSP00000250838	CDY2A	1e-05	0.946	690	0
ENSP00000250863	DAZL	1.87e-05	1	836	0.788932
ENSP00000250894	MAPK8IP3	1.35e-05	0.892	213	0.464509
ENSP00000250896	MKNK2	5.54e-05	0.94	858	0.714074
ENSP00000250916	KLF16	1.54e-05	0.928	841	0.974771
ENSP00000250937	DOHH	1.26e-05	0.932	805	0.680328
ENSP00000250971	INS	2.67e-05	0.524	973	0
ENSP00000250974	ABHD17A	8.31e-05	0.752	579	0.248625
ENSP00000251038	ZC3H14	1.42e-05	0.938	666	0.752305
ENSP00000251047	LMAN1	2.44e-05	0.95	564	0.234293
ENSP00000251074	NUP37	4.36e-05	0.794	918	0.677108
ENSP00000251089	ANGEL1	2.93e-05	0.95	354	0.377518
ENSP00000251102	CNGB1	2.1e-05	0.762	941	0.762215
ENSP00000251108	CDADC1	1.41e-05	0.926	457	0.395815
ENSP00000251119	ZFYVE26	3.83e-05	0.882	633	0.292891
ENSP00000251127	NALCN	2.92e-05	0.744	649	0.670512
ENSP00000251166	CORO7	0.000118087	0.88	242	0.415703
ENSP00000251170	SEC14L5	2.16e-05	0.934	613	0.744565
ENSP00000251203	PBX4	2.6e-05	0.562	725	0.953128
ENSP00000251241	DHX40	1.14e-05	0.942	505	0.739342
ENSP00000251250	DTWD1	0.000212906	0.954	159	0.746794
ENSP00000251269	ZNF221	1.83e-05	1	341	0.996736
ENSP00000251287	HCN2	5.45e-05	0.442	832	0.769039
ENSP00000251289	WDR18	2.56e-05	0.948	408	0.489799
ENSP00000251296	IGSF21	1.67e-05	0.92	0	0.471826
ENSP00000251303	SLX1A	1.44e-05	0.93	536	0.642826
ENSP00000251312	DHRS11	2.44e-05	0.934	378	0
ENSP00000251337	GNAT2	1.22e-05	0.944	987	0.991052
ENSP00000251343	KHNYN	0.000241368	0.942	0	0.629695
ENSP00000251363	CERS4	3.52e-05	0.226	916	0.525957
ENSP00000251372	LILRA1	1.54e-05	0.778	0	0.922209
ENSP00000251377	LILRA2	1.54e-05	0.79	0	0.922004
ENSP00000251390	LILRA3	1.54e-05	0.774	0	0
ENSP00000251412	TUBG2	1.42e-05	0.838	934	0.818854
ENSP00000251413	TUBG1	1.7e-05	0.594	979	0.802175
ENSP00000251473	DKFZP761J1410	2.86e-05	0.678	264	0
ENSP00000251507	RABGAP1L	2.1e-05	0.62	640	0.380494
ENSP00000251527	ESYT2	3.25e-05	0.942	583	0.417655
ENSP00000251535	ALOX12	3.95e-05	0.26	912	0.758445
ENSP00000251547	FBXO44	2.81e-05	0.946	242	0.221801
ENSP00000251566	UGT2A3	2.59e-05	0.806	318	0.268407
ENSP00000251582	ADAMTS2	3.03e-05	0.338	910	0.611125
ENSP00000251588	NARFL	1.94e-05	0.936	956	0.304409
ENSP00000251607	TRNT1	1.16e-05	0.948	209	0.639938
ENSP00000251630	PDGFRL	1.23e-05	0.938	633	0.995616
ENSP00000251636	DHX29	1.09e-05	0.914	644	0.762365
ENSP00000251642	DHX58	1.27e-05	0.934	357	0.740251
ENSP00000251643	KRT12	6.04e-05	0.128	835	0.345189
ENSP00000251645	KRT31	2.15e-05	0.288	412	0.438135
ENSP00000251646	KRT33B	4.04e-05	0.516	365	0.432601
ENSP00000251691	KIAA1244	3.21e-05	0.564	330	0
ENSP00000251757	PHC1	4.84e-05	0.96	954	0
ENSP00000251775	SNX4	1.7e-05	0.922	720	0.345707
ENSP00000251776	ROPN1B	4.14e-05	0.714	242	0.609124
ENSP00000251808	GRHL2	2.07e-05	0.598	597	0.78382
ENSP00000251809	SPAG1	1.51e-05	0.724	685	0.992157
ENSP00000251810	RRM2B	1.38e-05	0.94	905	0.865655
ENSP00000251849	RAF1	1.61e-05	0.93	996	0.950565
ENSP00000251864	TDRD1	3.39e-05	0.928	395	0.429212
ENSP00000251871	MED17	2.4e-05	0.95	900	0.941462
ENSP00000251900	SCML2	3.82e-05	0.876	957	0.893561
ENSP00000251921	NXPE1	4.14e-05	0.536	215	0.548237
ENSP00000251968	TSG101	1.21e-05	0.952	999	0.50397
ENSP00000251973	CARD10	1.8e-05	0.834	800	0.920084
ENSP00000251993	KIAA0930	2.2e-05	0.928	185	0.332739
ENSP00000252015	TRPC4AP	1.8e-05	0.954	587	0.315904
ENSP00000252029	TYMP	3.78e-05	0.934	963	0.640063
ENSP00000252032	C20orf194	3.85e-05	0.702	242	0.588699
ENSP00000252034	ELN	4.66e-05	0.522	576	0.343321
ENSP00000252037	FKBP6	1.05e-05	0.948	599	0.625481
ENSP00000252050	CUL9	4.71e-05	0.954	270	0.433081
ENSP00000252071	ACTR3C	1.08e-05	0.932	614	0.988758
ENSP00000252085	PCDHGA12	2.05e-05	0.86	207	0.425761
ENSP00000252087	PCDHGC5	4.39e-05	0.422	303	0.425848
ENSP00000252102	NDUFA2	1.55e-05	0.94	644	0.662801
ENSP00000252115	POLDIP3	1.6e-05	0.946	793	0.802021
ENSP00000252136	TRMT2A	1.33e-05	0.928	520	0.577149
ENSP00000252137	DGCR14	1.74e-05	0.94	428	0.42388
ENSP00000252172	MYH13	1.89e-05	0.748	901	0.852686
ENSP00000252211	ZKSCAN3	1.45e-05	0.922	341	0.990158
ENSP00000252229	MICB	1.2e-05	0.906	0	0.551742
ENSP00000252242	KRT5	3.39e-05	0.376	542	0.890579
ENSP00000252244	KRT1	3.27e-05	0.628	576	0.717108
ENSP00000252245	KRT75	4.65e-05	0.776	542	0.455029
ENSP00000252250	KRT6C	5.61e-05	0.648	542	0.479711
ENSP00000252252	KRT6B	5.01e-05	0.48	542	0.584575
ENSP00000252318	GALNT8	4.83e-05	0.326	910	0.637706
ENSP00000252321	KCNA5	3e-05	0.238	957	0.866017
ENSP00000252329	PSMG3	5.22e-05	0.94	232	0.283397
ENSP00000252445	ELOF1	3.83e-05	0.942	679	0.451638
ENSP00000252453	C19orf80	6.74e-05	0.212	358	0.441168
ENSP00000252455	PRKCSH	2.89e-05	0.944	538	0
ENSP00000252456	CNN1	3.1e-05	0.588	668	0.65642
ENSP00000252463	ZSCAN10	1.95e-05	0.938	905	0.988739
ENSP00000252482	EXOC3L2	1.4e-05	0.908	290	0.466668
ENSP00000252483	PVRL2	4.76e-05	0.91	800	0.306477
ENSP00000252486	APOE	2.7e-05	0.51	997	0.94369
ENSP00000252491	APOC1	2.97e-05	0.508	846	0
ENSP00000252505	ALLC	2.4e-05	0.318	583	0.560823
ENSP00000252506	GADD45G	2.34e-05	0.63	953	0.753233
ENSP00000252512	XPO7	3.6e-05	1	159	0.343347
ENSP00000252519	ACE2	2.86e-05	0.414	969	0.595657
ENSP00000252530	FAM98C	3.55e-05	0.928	266	0.460755
ENSP00000252542	SAFB2	2.12e-05	0.948	464	0.700406
ENSP00000252575	NCAN	3.03e-05	0.234	929	0.532652
ENSP00000252590	PLVAP	3.89e-05	0.342	302	0.385889
ENSP00000252593	BST2	2.55e-05	0.936	660	0.538433
ENSP00000252595	SLC27A1	2.91e-05	0.778	772	0.882431
ENSP00000252599	COLGALT1	0.000309317	0.952	342	0.419316
ENSP00000252603	PGLS	1.68e-05	0.936	669	0.593649
ENSP00000252622	LSM7	1.66e-05	0.944	571	0.666876
ENSP00000252655	RSPH3	8.26e-05	0.942	613	0.441829
ENSP00000252660	MAS1	3.18e-05	0.666	375	0.400969
ENSP00000252669	ACSBG2	1.97e-05	0.952	800	0
ENSP00000252674	MLLT1	1.61e-05	0.834	567	0.951401
ENSP00000252675	FUT5	3.88e-05	0.272	977	0.88681
ENSP00000252677	BMP15	3.47e-05	0.182	459	0.965763
ENSP00000252699	ACTN4	1.85e-05	0.936	999	0.810514
ENSP00000252711	NDUFA10	1.95e-05	0.932	440	0.673771
ENSP00000252723	EPO	3.61e-05	0.866	989	0.909652
ENSP00000252725	ARPC1B	3.7e-05	0.794	600	0.389497
ENSP00000252744	ZSWIM6	1.99e-05	0.93	358	0.447305
ENSP00000252771	FCHO1	2.6e-05	0.822	708	0.491728
ENSP00000252785	SCO2	1.58e-05	0.942	407	0.535738
ENSP00000252797	ZNF764	1.97e-05	0.938	507	0.989978
ENSP00000252799	ZNF747	2.17e-05	0.942	351	0.994879
ENSP00000252804	PXDN	2.33e-05	0.72	619	0.263516
ENSP00000252809	GDF15	3.37e-05	0.818	874	0.962413
ENSP00000252818	JUND	1.18e-05	0.952	999	0
ENSP00000252825	HRC	3.7e-05	0.424	370	0.389006
ENSP00000252826	TRPM4	3.2e-05	0.912	525	0.714688
ENSP00000252840	ZNF557	2.05e-05	0.896	444	0.996419
ENSP00000252854	OLFM1	5.17e-05	0.032	360	0.692865
ENSP00000252891	NUMBL	2.14e-05	0.492	745	0.834469
ENSP00000252934	ATXN10	4.95e-05	0.9	815	0.274336
ENSP00000252936	TUBGCP2	2.56e-05	0.914	964	0.570247
ENSP00000252939	CALY	6.43e-05	0.172	237	0.386623
ENSP00000252945	CYP2E1	3.15e-05	0.536	972	0.81628
ENSP00000252951	HBZ	3.18e-05	0.834	976	0.666889
ENSP00000252979	ZNF337	1.39e-05	0.938	341	0.99443
ENSP00000252992	CEP85	6.19e-05	0.942	207	0.568958
ENSP00000252996	TAF4	2.42e-05	0.938	944	0.960609
ENSP00000252997	GATA5	1.44e-05	0.732	895	0
ENSP00000252998	RBBP8NL	1.82e-05	0.86	499	0.492484
ENSP00000252999	LAMA5	3.83e-05	0.688	900	0.701472
ENSP00000253003	ADRM1	1.96e-05	0.954	681	0.622398
ENSP00000253004	ASS1	1.82e-05	0.944	998	0.731685
ENSP00000253023	UBE2M	2.18e-05	0.936	694	0.601063
ENSP00000253024	TRIM28	1.95e-05	0.94	985	0.954521
ENSP00000253031	YIPF2	4.61e-05	0.938	440	0.313513
ENSP00000253039	EIF2S3	1.23e-05	0.93	632	0.804061
ENSP00000253047	TMEM160	7.08e-05	0.93	351	0.455922
ENSP00000253048	ZC3H4	2.44e-05	0.948	0	0.587594
ENSP00000253063	SESN2	2.73e-05	0.936	802	0.670378
ENSP00000253079	CCDC62	5.7e-05	0.314	658	0.421069
ENSP00000253083	HIP1R	1.76e-05	0.95	786	0.384741
ENSP00000253109	ANGPTL6	3.47e-05	0.67	431	0.403814
ENSP00000253110	C19orf66	1.18e-05	0.878	153	0.767857
ENSP00000253115	ZNF426	1.71e-05	0.93	571	0.99183
ENSP00000253122	SLC6A8	2.77e-05	0.344	547	0.596878
ENSP00000253144	ZNF331	1.68e-05	0.918	341	0.985897
ENSP00000253159	ZNF236	1.49e-05	0.956	447	0.98884
ENSP00000253255	PKDREJ	2.14e-05	0.766	286	0.328895
ENSP00000253262	NUTMF	7.15e-05	0.7	358	0
ENSP00000253270	SLC35D2	1.96e-05	0.79	915	0.318592
ENSP00000253303	RGN	1.79e-05	0.896	526	0.543638
ENSP00000253332	AKAP12	3.73e-05	0.77	845	0.638611
ENSP00000253354	BPIFB1	7.64e-05	0.002	356	0.421506
ENSP00000253362	BPIFA2	9.14e-05	0.082	394	0.427678
ENSP00000253363	RBM39	1.54e-05	0.958	487	0.784493
ENSP00000253381	DEFB118	1.67e-05	0.79	325	0.578512
ENSP00000253382	ACSS2	1.95e-05	0.958	564	0.597957
ENSP00000253392	EDA2R	3.08e-05	0.602	407	0.864553
ENSP00000253401	ARHGEF9	1.78e-05	0.902	199	0.378362
ENSP00000253407	C1QL1	0.000190143	0.946	282	0.529353
ENSP00000253413	ATP6V1E1	1.76e-05	0.948	562	0.306805
ENSP00000253435	TEX101	4.16e-05	0.562	329	0
ENSP00000253452	COX4I1	1.31e-05	0.942	830	0.738747
ENSP00000253457	EMC8	5.18e-05	0.948	890	0.44144
ENSP00000253458	GSE1	6.82e-05	0.964	572	0.406993
ENSP00000253461	C16orf95	0.000147999	0.156	478	0.530617
ENSP00000253571	RLIM	2.2e-05	0.93	933	0.675361
ENSP00000253577	ABCB7	3.16e-05	0.9	918	0.336438
ENSP00000253669	HAUS8	0.000147362	0.802	948	0.478267
ENSP00000253680	HSH2D	4.76e-05	0.374	349	0
ENSP00000253686	MRPS25	2.1e-05	0.926	233	0.36074
ENSP00000253693	CAPN7	1.22e-05	0.948	564	0
ENSP00000253699	ZFYVE20	1.01e-05	0.94	264	0
ENSP00000253719	NAPSA	2.25e-05	0.942	595	0.278397
ENSP00000253727	NR1H2	2e-05	0.598	986	0.863393
ENSP00000253754	PDLIM4	1.78e-05	0.894	459	0.683772
ENSP00000253778	GFPT2	2.29e-05	0.764	903	0.623864
ENSP00000253794	VPS25	3.08e-05	0.952	374	0.355707
ENSP00000253799	AOC2	1.97e-05	0.466	873	0.592188
ENSP00000253801	G6PC	4.26e-05	0.384	900	0.359704
ENSP00000253807	PCDHAC1	3.98e-05	0.544	504	0.428843
ENSP00000253812	PCDHGA3	4.77e-05	0.46	282	0.468368
ENSP00000253814	NDFIP1	3.08e-05	0.936	881	0.253298
ENSP00000253856	ATP6V0A4	1.49e-05	0.928	782	0.401155
ENSP00000253861	EXOC4	1.76e-05	0.95	953	0.594909
ENSP00000253925	PPFIA1	2.65e-05	0.776	453	0.427251
ENSP00000253934	TMEM204	2.45e-05	0.77	241	0.597544
ENSP00000254029	WDR44	7.48e-05	0.948	569	0.337609
ENSP00000254035	CKMT2	3.41e-05	0.732	700	0.499399
ENSP00000254043	KRT15	4.12e-05	0.658	646	0.575329
ENSP00000254066	RARA	2e-05	0.744	996	0.968795
ENSP00000254072	KRTAP9-8	4.73e-05	0.456	416	0.701217
ENSP00000254079	PPP1R1B	2.66e-05	0.73	903	0.739157
ENSP00000254090	FMO5	3.32e-05	0.47	653	0.80966
ENSP00000254108	FUS	1.54e-05	0.914	610	0.903782
ENSP00000254122	FSHB	3.15e-05	0.164	900	0.886668
ENSP00000254166	ZNF132	1.51e-05	0.946	341	0.988233
ENSP00000254181	USP29	1.68e-05	0.958	576	0.451279
ENSP00000254190	CHSY1	4.32e-05	0.948	198	0.415885
ENSP00000254227	NR0B2	2.52e-05	0.59	957	0.880176
ENSP00000254231	LIN28A	2.14e-05	0.946	989	0.905163
ENSP00000254235	ADCY7	1.17e-05	0.936	919	0.99762
ENSP00000254250	THAP1	1.66e-05	0.92	357	0.40484
ENSP00000254260	RHPN2	1.51e-05	0.926	546	0
ENSP00000254286	ACTR10	1.03e-05	0.936	710	0.98418
ENSP00000254301	LGALS3	3.07e-05	0.256	865	0.933962
ENSP00000254321	ZNF700	1.41e-05	0.948	341	0.995685
ENSP00000254322	DNAJB1	1.8e-05	0.952	900	0.7748
ENSP00000254323	ZSWIM4	2.93e-05	0.722	211	0.457186
ENSP00000254325	RFX1	1.61e-05	0.714	899	0.919982
ENSP00000254336	C19orf57	1.01e-05	0.92	0	0.488317
ENSP00000254351	SDC1	3.79e-05	0.262	996	0.925966
ENSP00000254436	TRIM21	1.45e-05	0.948	606	0.64046
ENSP00000254442	WDR7	1.16e-05	0.926	254	0.241711
ENSP00000254457	LHX1	3.11e-05	0.106	824	0
ENSP00000254480	SMARCC1	1.99e-05	0.94	919	0.972923
ENSP00000254488	SLC6A11	3.02e-05	0.298	685	0.902698
ENSP00000254508	NUP210	1.97e-05	0.938	408	0.750361
ENSP00000254521	HSD17B7	2.85e-05	0.926	930	0.660407
ENSP00000254528	EMILIN2	6.81e-05	0.158	201	0.705135
ENSP00000254579	DNHD1	4.22e-05	0.886	627	0.784338
ENSP00000254584	ARFIP2	3.6e-05	0.614	537	0.455377
ENSP00000254605	RRP8	1.01e-05	0.932	406	0.654342
ENSP00000254624	EFR3A	0.000142877	0.968	164	0.602633
ENSP00000254627	OC90	2.79e-05	0.7	323	0
ENSP00000254630	PTCD3	1.59e-05	0.936	242	0.42393
ENSP00000254654	ILKAP	1.76e-05	0.922	660	0.804876
ENSP00000254657	PER2	3.4e-05	0.938	774	0.903598
ENSP00000254661	RAMP1	0.000116305	0.004	999	0.626454
ENSP00000254663	SCLY	1.69e-05	0.94	413	0.460106
ENSP00000254667	PTPRE	2.71e-05	0.798	456	0.749027
ENSP00000254691	CARD6	0.000179371	0.956	198	0.433644
ENSP00000254695	RAP1GAP2	2.48e-05	0.942	371	0.278616
ENSP00000254719	RPA1	1.83e-05	0.896	949	0.914667
ENSP00000254722	SERPINF1	3.96e-05	0.874	859	0.891136
ENSP00000254730	EEFSEC	2.22e-05	0.948	433	0.404633
ENSP00000254742	TMEM128	0.000182537	0.908	345	0.456885
ENSP00000254759	COQ3	1.63e-05	0.934	393	0.344667
ENSP00000254765	POPDC3	3.76e-05	0.432	235	0.501798
ENSP00000254770	LANCL2	6.39e-05	0.926	224	0.409508
ENSP00000254799	GRSF1	4.5e-05	0.938	0	0.493738
ENSP00000254801	IGJ	3.35e-05	0.844	435	0
ENSP00000254803	UTP3	1.15e-05	0.926	260	0.708117
ENSP00000254806	WBP2	5.85e-05	0.96	386	0.260714
ENSP00000254810	H3F3B	1.46e-05	0.96	885	0.991253
ENSP00000254816	TRIM47	9.61e-05	0.914	165	0.435692
ENSP00000254835	ANKRD20A3	1.79e-05	0.948	358	0
ENSP00000254846	KDM6B	1.05e-05	0.938	817	0
ENSP00000254853	SLC52A1	2.81e-05	0.688	264	0.417492
ENSP00000254868	CLEC10A	2.73e-05	0.178	792	0.498947
ENSP00000254878	HRSP12	2.7e-05	0.948	284	0.231312
ENSP00000254900	BRD8	5.79e-05	0.936	323	0.868324
ENSP00000254901	REEP2	2.19e-05	0.756	900	0.399881
ENSP00000254908	PCBD2	1.21e-05	0.94	251	0.440118
ENSP00000254928	ERAL1	1.81e-05	0.936	322	0.368402
ENSP00000254942	TERF2	2.54e-05	0.944	900	0.783392
ENSP00000254950	VPS4A	1.11e-05	0.924	635	0.37839
ENSP00000254958	JAG1	2.43e-05	0.778	923	0.974785
ENSP00000254976	SNAP25	3.32e-05	0.932	929	0.635359
ENSP00000254998	NXT1	5.04e-05	0.944	998	0.796292
ENSP00000255006	RIN2	0.000103034	0.956	603	0.349403
ENSP00000255008	SSTR4	3.92e-05	0.052	917	0.946242
ENSP00000255030	CRP	3.78e-05	0.444	576	0.374303
ENSP00000255039	HAPLN2	3.72e-05	0.5	400	0.37581
ENSP00000255040	APCS	2.93e-05	0.492	911	0.584482
ENSP00000255078	IGHMBP2	1.67e-05	0.776	606	0.764984
ENSP00000255084	ALDH3B2	1.79e-05	0.844	964	0.560906
ENSP00000255087	MTL5	2.24e-05	0.694	472	0.647861
ENSP00000255108	DPH2	1.72e-05	0.95	503	0.52766
ENSP00000255120	NASP	2.85e-05	0.824	896	0.785484
ENSP00000255129	ZNF334	1.82e-05	0.948	350	0.995745
ENSP00000255152	ZSWIM3	5.77e-05	0.354	246	0.515822
ENSP00000255174	C20orf111	0.000202973	0.894	330	0
ENSP00000255175	SERINC3	2.29e-05	0.904	461	0.602017
ENSP00000255189	DMGDH	1.33e-05	0.948	551	0.706466
ENSP00000255192	BHMT2	2.76e-05	0.6	408	0.475518
ENSP00000255194	AP3B1	1.26e-05	0.936	575	0.549244
ENSP00000255198	ZBED3	0.000162777	0.93	379	0.393228
ENSP00000255226	SLC14A2	2.77e-05	0.522	789	0.328747
ENSP00000255262	NMUR2	3.4e-05	0.024	999	0.995933
ENSP00000255266	PDE6A	1.03e-05	0.936	962	0.989852
ENSP00000255304	USPL1	1.66e-05	0.942	282	0.44443
ENSP00000255305	XPO4	7.39e-05	0.938	179	0.441717
ENSP00000255324	RNF17	2.4e-05	0.918	572	0.45511
ENSP00000255380	CHRM3	2.79e-05	0.114	913	0.899156
ENSP00000255381	MYH4	1.92e-05	0.672	814	0.957099
ENSP00000255389	PEMT	2.61e-05	0.914	903	0.495521
ENSP00000255390	SCO1	2.2e-05	0.93	407	0.35198
ENSP00000255409	CHI3L1	3.61e-05	0.058	480	0.707199
ENSP00000255448	DCLK1	1.84e-05	0.462	792	0.990088
ENSP00000255465	CCNA1	2e-05	0.814	997	0.980143
ENSP00000255476	RFXAP	1.43e-05	0.886	196	0.674903
ENSP00000255499	RNF128	3.58e-05	0.912	507	0.878083
ENSP00000255608	BTBD2	3.51e-05	0.938	292	0.425399
ENSP00000255613	SUV420H2	4.22e-05	0.934	386	0.436121
ENSP00000255631	HSPBP1	2.4e-05	0.938	932	0.320985
ENSP00000255641	CSNK1G2	1.79e-05	0.934	910	0.445629
ENSP00000255674	RTTN	9.93e-05	0.8	606	0.461755
ENSP00000255681	MACROD1	1.25e-05	0.942	278	0.250024
ENSP00000255688	RARRES3	9.39e-05	0.798	743	0.697655
ENSP00000255695	HRASLS2	4.83e-05	0.47	225	0.370357
ENSP00000255746	ZNF679	1.85e-05	0.922	341	0.996617
ENSP00000255759	FOPNL	0.00010035	0.938	808	0.395842
ENSP00000255764	MED10	2.39e-05	0.918	900	0.831936
ENSP00000255784	CCDC134	4.99e-05	0.922	323	0.356305
ENSP00000255945	GIMAP4	6.97e-05	0.886	505	0.531045
ENSP00000255977	MKRN1	3.81e-05	0.94	776	0.378632
ENSP00000255992	KRBA1	7.89e-05	0.36	158	0
ENSP00000256001	ACTR3B	1.14e-05	0.954	614	0.987857
ENSP00000256010	NTS	3.3e-05	0.19	954	0.874977
ENSP00000256015	BTG1	6.2e-05	0.928	599	0.52946
ENSP00000256031	ATP13A3	2.75e-05	0.946	736	0.86717
ENSP00000256039	DYDC2	7.22e-05	0.118	514	0.534009
ENSP00000256078	KRAS	1.56e-05	0.838	929	0.945287
ENSP00000256103	PMP2	4.21e-05	0.228	699	0.316828
ENSP00000256151	CCDC59	8.08e-05	0.92	250	0.474782
ENSP00000256186	MICALCL	0.000100747	0.936	646	0.476381
ENSP00000256190	SBF2	2.67e-05	0.96	431	0.237795
ENSP00000256194	MICAL2	2.6e-05	0.87	496	0.508478
ENSP00000256196	RRAS2	1e-05	0.94	889	0.982643
ENSP00000256246	TEX15	4.65e-05	0.364	900	0.451251
ENSP00000256255	TMEM66	6.15e-05	0.956	360	0
ENSP00000256257	RNF122	4.14e-05	0.952	270	0.459629
ENSP00000256261	DUSP26	2.45e-05	0.338	547	0.97755
ENSP00000256319	C14orf1	4.16e-05	0.9	736	0.683164
ENSP00000256324	C14orf159	3.39e-05	0.546	237	0.450592
ENSP00000256339	UNC79	7.54e-05	0.788	562	0.475628
ENSP00000256362	VRTN	6.15e-05	0.332	158	0.752502
ENSP00000256366	SYNJ2BP	9.94e-05	0.936	489	0.435434
ENSP00000256367	TTC9	1.59e-05	0.954	159	0.517419
ENSP00000256379	MED6	1.98e-05	0.968	905	0.916931
ENSP00000256383	EIF2S1	1.43e-05	0.94	569	0.822684
[truncated: 14,257 more rows]
