# Supplementary material for: Identification of Novel Lung Cancer Driver Genes Connecting Different Omics Levels With a Heat Diffusion Algorithm
Source: Front Cell Dev Biol. 2022 Jan 26;10:825272. doi: 10.3389/fcell.2022.825272 (PMC8826452; doi:10.3389/fcell.2022.825272)
Supplement: Supplementary file 3 [file Table4.XLSX]

## Sheet: Sheet1
Ensembl ID	Gene symbol	Heat	P-value	MAS	MFS
ENSP00000000233	ARF5	2.69e-05	0.386	796	0.9694
ENSP00000000412	M6PR	8.44e-05	0.146	656	0.495526
ENSP00000000442	ESRRA	0.000118702	0.43	957	0.947735
ENSP00000001008	FKBP4	4.08e-05	0.408	942	0.757682
ENSP00000001146	CYP26B1	9.48e-05	0.476	957	0.651635
ENSP00000002125	NDUFAF7	3.45e-05	0.904	366	0.406762
ENSP00000002165	FUCA2	4.7e-05	0.862	257	0.245872
ENSP00000002596	HS3ST1	5.02e-05	0.638	925	0.540544
ENSP00000002829	SEMA3F	4.79e-05	0.606	983	0.892971
ENSP00000003084	CFTR	1.83e-05	0.44	979	0.717607
ENSP00000003100	CYP51A1	9.66e-05	0.428	978	0.696734
ENSP00000004103	TMEM176A	6.55e-05	0.354	282	0.586375
ENSP00000004531	SLC7A2	2.75e-05	0.546	370	0.500128
ENSP00000004921	CCL18	3.03e-05	0.342	595	0
ENSP00000004982	HSPB6	3.2e-05	0.58	493	0.349033
ENSP00000005178	PDK4	2.7e-05	0.472	916	0.587761
ENSP00000005180	CCL26	3.5e-05	0.528	0	0.789359
ENSP00000005226	USH1C	2.16e-05	0.492	985	0.785625
ENSP00000005257	RALA	1.63e-05	0.388	983	0.992629
ENSP00000005260	BAIAP2L1	6.45e-05	0.778	837	0.28369
ENSP00000005284	CACNG3	2.38e-05	0.514	815	0.50849
ENSP00000005286	TMEM132A	6.96e-05	0.83	446	0.557081
ENSP00000005386	RPAP3	4.8e-05	0.876	353	0.260134
ENSP00000005558	IFRD1	4.04e-05	0.68	468	0.563713
ENSP00000005587	SKAP2	4.84e-05	0.552	606	0.370058
ENSP00000005905	-	6.81e-05	0.808	195	0
ENSP00000005995	PRSS21	3.25e-05	0.944	223	0.207926
ENSP00000006015	HOXA11	4.02e-05	0.496	645	0.972766
ENSP00000006053	CX3CL1	2.08e-05	0.232	582	0.713547
ENSP00000006101	COPZ2	4.06e-05	0.546	921	0
ENSP00000006275	TRAPPC6A	2.54e-05	0.476	999	0.60145
ENSP00000006526	WDR54	0.000111752	0.736	309	0.68679
ENSP00000006658	SPATA20	3.75e-05	0.446	648	0.409859
ENSP00000006724	CEACAM7	6.11e-05	0.194	265	0.397926
ENSP00000006777	RHBDD2	3.24e-05	0.598	459	0.473616
ENSP00000007264	RPUSD1	2.2e-05	0.954	229	0.678963
ENSP00000007390	TSR3	6.47e-05	0.652	568	0.244302
ENSP00000007414	OSBPL7	3.71e-05	0.608	606	0.253579
ENSP00000007516	NDUFAB1	1.57e-05	0.89	936	0.618641
ENSP00000007699	YBX2	8.38e-05	0.436	505	0.783893
ENSP00000007722	ITGA3	2.66e-05	0.788	940	0.779292
ENSP00000007735	KRT33A	1.7e-05	0.858	198	0.52206
ENSP00000007969	LRRC23	2.57e-05	0.596	577	0.825641
ENSP00000008527	CRY1	6.46e-05	0.422	999	0.831819
ENSP00000008938	PGLYRP1	2.62e-05	0.53	404	0.459917
ENSP00000009041	STARD3NL	0.0009446	0.384	564	0.361643
ENSP00000009105	CAMK1G	1.37e-05	0.928	417	0.997128
ENSP00000009180	CD9	1.56e-05	0.638	965	0.884943
ENSP00000009530	CD74	2.45e-05	0.668	902	0.794408
ENSP00000010132	DYRK4	1.4e-05	0.604	461	0.994225
ENSP00000010299	FAM76A	0.000840606	0.368	483	0.477024
ENSP00000010404	MGST1	4.03e-05	0.518	906	0.547703
ENSP00000011292	CPA1	1.97e-05	0.794	643	0.288609
ENSP00000011473	SYPL1	0.00022841	0.542	240	0.46114
ENSP00000011653	CD4	1.03e-05	0.51	913	0.964211
ENSP00000011684	PLEKHG6	4.7e-05	0.69	585	0.287703
ENSP00000011691	SS18L2	8.41e-05	0.672	497	0.528762
ENSP00000011898	TSPAN9	0.000258232	0.392	645	0.338865
ENSP00000012049	QPCTL	5.03e-05	0.82	500	0.31437
ENSP00000012443	PPP5C	1.12e-05	0.818	854	0.994437
ENSP00000013034	NME1	2.68e-05	0.488	900	0.825815
ENSP00000013070	UBR7	7.51e-05	0.874	387	0.424075
ENSP00000013125	MAP4K5	3.49e-05	0.444	681	0.990835
ENSP00000013222	INMT	3.98e-05	0.314	194	0.376441
ENSP00000013807	ERCC1	2.5e-05	0.586	984	0.867577
ENSP00000014914	GPRC5A	6.22e-05	0.886	286	0.510937
ENSP00000014930	HEBP1	3.6e-05	0.902	900	0.870358
ENSP00000014935	DNASE1L1	5.06e-05	0.576	242	0.376429
ENSP00000016171	COX15	2.87e-05	0.756	324	0.500857
ENSP00000016946	RGPD5	1.65e-05	0.662	823	0.987453
ENSP00000017003	XYLT2	2.5e-05	0.522	490	0.63616
ENSP00000019103	SCTR	2.08e-05	0.532	972	0.715644
ENSP00000019317	RALBP1	3.11e-05	0.66	905	0.596415
ENSP00000020926	SYT13	4.4e-05	0.296	610	0.330367
ENSP00000020945	SNAI2	2.18e-05	0.36	892	0.986268
ENSP00000023064	SLC7A9	2.28e-05	0.936	920	0.569677
ENSP00000023897	GABRA1	2.42e-05	0.456	583	0.605989
ENSP00000023939	RTFDC1	0.000157004	0.516	355	0.543415
ENSP00000024061	SLC45A4	3.93e-05	0.93	288	0.290531
ENSP00000025008	RB1CC1	3.04e-05	0.536	960	0.687874
ENSP00000025301	AKAP11	0.000126135	0.546	581	0.264733
ENSP00000026218	PIGQ	4.72e-05	0.55	561	0.250199
ENSP00000027335	CDH17	1.36e-05	0.32	927	0.983473
ENSP00000029410	B4GALT7	2.2e-05	0.68	910	0.687791
ENSP00000033079	FAM13B	0.000249506	0.338	268	0.756643
ENSP00000035307	CHPF2	2.67e-05	0.524	950	0.677032
ENSP00000037243	GABARAPL2	7.29e-05	0.356	776	0.519054
ENSP00000037502	MYOC	3.56e-05	0.192	826	0.683313
ENSP00000037869	FAM136A	7.35e-05	0.84	223	0.495341
ENSP00000039007	OTC	1.29e-05	0.818	993	0.736843
ENSP00000039989	TTC17	9.98e-05	0.63	525	0.6452
ENSP00000040584	HOXC8	4.75e-05	0.306	885	0.979949
ENSP00000040663	MRI1	5.65e-05	0.742	583	0.411684
ENSP00000040738	BOD1L1	8.1e-05	0.636	359	0.457699
ENSP00000040877	TARBP1	2.74e-05	0.918	400	0.724126
ENSP00000042931	BEST2	3.87e-05	0.432	823	0.643676
ENSP00000043402	RTN4R	2.04e-05	0.482	998	0.831951
ENSP00000044462	PSMA4	2.1e-05	0.688	998	0.663148
ENSP00000045083	FAM65C	5.83e-05	0.462	347	0.422815
ENSP00000046087	ZPBP	1.71e-05	0.816	496	0.23309
ENSP00000046794	LCP2	3.71e-05	0.5	901	0.853377
ENSP00000052754	DCN	1.5e-05	0.344	986	0.943191
ENSP00000053243	TNFRSF17	2.84e-05	0.634	398	0.728843
ENSP00000053468	MRPS10	5.17e-05	0.434	950	0.854822
ENSP00000053469	GUCA1A	1.52e-05	0.758	683	0.600328
ENSP00000053867	GRN	2.49e-05	0.568	821	0.766535
ENSP00000054650	THAP3	0.000151456	0.546	802	0.450579
ENSP00000054666	VAMP3	4.37e-05	0.19	967	0.681814
ENSP00000054668	UTS2	1.38e-05	0.92	900	0.810922
ENSP00000054950	RCN1	2.87e-05	0.42	644	0.619813
ENSP00000055077	RFC2	1.75e-05	0.488	659	0.927893
ENSP00000055335	PPP1R3F	4.01e-05	0.442	509	0.374529
ENSP00000055682	KIAA2022	3.1e-05	0.79	227	0.319865
ENSP00000056217	ARHGEF5	2.86e-05	0.61	618	0.754125
ENSP00000056233	NFE2L3	5.4e-05	0.594	744	0.858871
ENSP00000057513	TNIP3	5.8e-05	0.848	753	0.332137
ENSP00000058691	HEBP2	0.000115649	0.75	242	0
ENSP00000061240	TLL1	4.37e-05	0.766	407	0.588203
ENSP00000062104	NNAT	5.1e-05	0.866	311	0.32348
ENSP00000064571	CBLN4	5.65e-05	0.236	303	0.302095
ENSP00000064724	CLDN11	2.04e-05	0.62	911	0.520926
ENSP00000064780	RELT	3.67e-05	0.454	257	0.329087
ENSP00000070846	PKP2	3.17e-05	0.458	925	0.658707
ENSP00000071281	FHL1	6.38e-05	0.624	576	0.605575
ENSP00000072644	YIPF1	5.13e-05	0.73	839	0.74956
ENSP00000072869	ADCK2	5.19e-05	0.694	338	0.265088
ENSP00000074304	INPP4A	5.04e-05	0.788	900	0.425216
ENSP00000075120	SLC2A3	5.37e-05	0.458	826	0.505557
ENSP00000078429	GNA11	2.49e-05	0.418	968	0.882416
ENSP00000078445	CREB3L3	1.96e-05	0.73	857	0.600683
ENSP00000078527	PIGV	2.79e-05	0.932	495	0.215201
ENSP00000080059	HDAC7	1.3e-05	0.518	997	0
ENSP00000081029	MRPS35	4.23e-05	0.908	666	0.617013
ENSP00000083182	APPBP2	1.55e-05	0.518	464	0.883851
ENSP00000084798	CA11	1.32e-05	0.932	219	0.382576
ENSP00000085068	ISOC2	6.52e-05	0.882	163	0.472738
ENSP00000085219	CD22	2.34e-05	0.88	701	0.824376
ENSP00000086933	GSC2	3.25e-05	0.468	402	0.949292
ENSP00000155093	ZFY	2.3e-05	0.438	501	0.979314
ENSP00000155840	KCNQ1	1.88e-05	0.55	915	0.649492
ENSP00000155858	TRPM5	1.87e-05	0.846	636	0.612179
ENSP00000155926	TRIB2	1.3e-05	0.784	641	0.995343
ENSP00000156084	OTUD5	3.97e-05	0.682	244	0.648937
ENSP00000156109	GPKOW	2.7e-05	0.514	550	0.378462
ENSP00000156471	AQR	3.88e-05	0.674	740	0.863838
ENSP00000156626	ST6GALNAC1	4.01e-05	0.468	936	0.601696
ENSP00000156825	MBD3	0.000464394	0.362	900	0.895143
ENSP00000157600	LMCD1	2.02e-05	0.874	529	0.43344
ENSP00000157812	PSMC4	2.45e-05	0.554	920	0.746119
ENSP00000158009	FNDC8	1.23e-05	0.814	0	0.801641
ENSP00000158166	CAMKK1	3.22e-05	0.14	995	0.778839
ENSP00000158762	ACAP1	3.24e-05	0.616	903	0.616253
ENSP00000158771	DERL2	8.13e-05	0.218	682	0.583918
ENSP00000159060	NOX3	3.83e-05	0.082	908	0.776721
ENSP00000159087	ANO8	6.33e-05	0.392	603	0.294158
ENSP00000159111	KDM4B	6.78e-05	0.416	874	0.949449
ENSP00000160262	ICAM3	9.84e-05	0.056	800	0.80275
ENSP00000160382	ACTL6B	1.22e-05	0.646	975	0.985654
ENSP00000160740	CIC	2.53e-05	0.772	410	0.676073
ENSP00000160827	KIF22	1.9e-05	0.69	572	0.86091
ENSP00000161006	PRSS22	1.42e-05	0.936	261	0.350639
ENSP00000161559	CEACAM1	3.45e-05	0.132	388	0.739509
ENSP00000161863	YTHDC2	1.63e-05	0.524	715	0.966286
ENSP00000162023	MEF2BNB-MEF2B	1.48e-05	0.862	584	0
ENSP00000162044	TMEM161A	0.000161278	0.75	240	0.692824
ENSP00000162391	FOXJ2	3.66e-05	0.372	402	0
ENSP00000162749	TNFRSF1A	3.67e-05	0.402	980	0.955971
ENSP00000163416	GOLGA5	1.7e-05	0.626	382	0.411118
ENSP00000164024	CELSR3	2.34e-05	0.548	648	0.617124
ENSP00000164133	PPP2R5B	2.04e-05	0.826	956	0.680024
ENSP00000164139	PYGM	2.04e-05	0.602	933	0.560718
ENSP00000164227	BCL3	2.07e-05	0.402	967	0.972227
ENSP00000164305	PIGB	6.49e-05	0.62	726	0.224155
ENSP00000166139	FSTL3	3.91e-05	0.734	607	0.823152
ENSP00000166244	EPHA8	1.25e-05	0.914	900	0.996248
ENSP00000166345	TRIP13	1.72e-05	0.478	896	0.752195
ENSP00000166534	P4HA2	3.83e-05	0.826	419	0.434047
ENSP00000167106	VASH1	2.38e-05	0.806	202	0.226831
ENSP00000167586	KRT14	3.08e-05	0.51	827	0.924452
ENSP00000167588	KRT20	4.43e-05	0.41	396	0.478739
ENSP00000168148	SPP2	6.69e-05	0.498	480	0.288421
ENSP00000168216	HSD17B10	1.13e-05	0.96	231	0.395988
ENSP00000168712	FGF4	4.69e-05	0.284	942	0.989204
ENSP00000168977	NMRK2	3.08e-05	0.418	905	0.939631
ENSP00000169298	ST6GAL1	3.72e-05	0.392	911	0.745513
ENSP00000169551	TIMM21	8.01e-05	0.74	937	0.610527
ENSP00000170150	BPIFB2	2.47e-05	0.798	150	0.498503
ENSP00000170168	REXO1	7.17e-05	0.296	733	0.864601
ENSP00000170447	MKRN2	4.69e-05	0.88	269	0.411996
ENSP00000170564	GPATCH1	7.9e-05	0.672	418	0.490451
ENSP00000170630	IL4R	3.04e-05	0.44	973	0.897496
ENSP00000171111	KEAP1	5.74e-05	0.386	904	0.820595
ENSP00000171214	RDH8	0.000169679	0.31	925	0
ENSP00000171757	P2RY10	1.38e-05	0.93	900	0.814878
ENSP00000171887	TNS1	2e-05	0.424	985	0.907636
ENSP00000172229	NGFR	1.92e-05	0.5	996	0.954457
ENSP00000173229	NTN1	6.93e-05	0.268	998	0.940321
ENSP00000173527	ISOC1	0.000459079	0.384	632	0.449356
ENSP00000173898	TRO	6.51e-05	0.446	843	0.744537
ENSP00000174618	MNT	5.65e-05	0.274	928	0.740076
ENSP00000174653	AP3M2	4.74e-05	0.49	400	0.871943
ENSP00000175091	LAPTM4A	0.000237117	0.384	644	0.26665
ENSP00000175238	ADAM7	2.26e-05	0.628	378	0.283889
ENSP00000175506	ASNS	7.07e-05	0.44	903	0.679202
ENSP00000175756	PTPN18	2.87e-05	0.25	941	0.736675
ENSP00000176183	DRD4	1.74e-05	0.846	904	0.776422
ENSP00000176195	SCT	7.23e-05	0.682	937	0.46031
ENSP00000176763	STK10	0.000140746	0.618	306	0.37115
ENSP00000177648	ALPK1	5.83e-05	0.32	260	0.431663
ENSP00000177694	TBX21	2.17e-05	0.444	992	0.958091
ENSP00000178638	CA12	4.31e-05	0.712	351	0.343236
ENSP00000178640	MAP2K5	1.42e-05	0.422	929	0.990396
ENSP00000179259	C12orf5	3.43e-05	0.78	816	0
ENSP00000180166	FGF20	2.4e-05	0.242	901	0.980534
ENSP00000180173	MTMR7	0.000140168	0.038	537	0.837031
ENSP00000181383	CPB2	2.67e-05	0.858	307	0.599034
ENSP00000181796	FAM107B	0.00310726	0.364	174	0.693792
ENSP00000182096	CRYBG3	2.86e-05	0.61	343	0
ENSP00000182377	FAR2	6.8e-05	0.66	393	0.272984
ENSP00000182527	TRAM2	0.000357131	0.288	730	0.353957
ENSP00000183605	CLDN18	2.87e-05	0.548	895	0.368074
ENSP00000184183	ROPN1	5.18e-05	0.356	584	0.445052
ENSP00000184266	NDUFB4	4.49e-05	0.832	910	0.721534
ENSP00000184956	HEATR6	0.000100956	0.616	506	0.844756
ENSP00000185150	ERLEC1	3.38e-05	0.766	759	0.513962
ENSP00000185206	CLIC5	2.73e-05	0.444	574	0.583322
ENSP00000186436	TMEM131	4.95e-05	0.688	356	0.212846
ENSP00000187762	TMEM38A	4.22e-05	0.438	264	0.319401
ENSP00000188312	ACTR6	1.79e-05	0.406	876	0.660892
ENSP00000188790	FAP	0.000109659	0.19	644	0.240163
ENSP00000190165	DMRT3	2.61e-05	0.388	755	0.652193
ENSP00000190983	WISP2	3.81e-05	0.606	414	0.489867
ENSP00000192314	GAL3ST2	5.95e-05	0.374	416	0.612498
ENSP00000192788	UHRF1BP1	0.000219832	0.398	412	0.502752
ENSP00000193322	OSTM1	0.00028003	0.368	656	0.257143
ENSP00000193391	IMPG2	2.71e-05	0.622	482	0.635185
ENSP00000194118	KIAA0141	2.12e-05	0.492	645	0.708417
ENSP00000194130	SLC13A1	1.99e-05	0.916	714	0.6741
ENSP00000194152	PCDHB4	0.000177531	0.77	284	0.514791
ENSP00000194155	PCDHB2	0.000143679	0.878	284	0.550076
ENSP00000194214	HSPB11	6.6e-05	0.496	507	0.536291
ENSP00000194530	STRADB	0.000215141	0.32	993	0.397373
ENSP00000195455	C4orf6	2.68e-05	0.798	242	0
ENSP00000195654	DOPEY1	5.22e-05	0.488	962	0.337392
ENSP00000196061	PLOD1	3.86e-05	0.482	848	0.558225
ENSP00000196371	OXCT1	2.1e-05	0.726	912	0.485061
ENSP00000196482	ZNF324	2.84e-05	0.394	501	0.995245
ENSP00000196489	ZNF416	3.2e-05	0.364	501	0.996563
ENSP00000196548	ZNF8	2.86e-05	0.432	566	0
ENSP00000196551	RPS5	1.67e-05	0.834	999	0.909637
ENSP00000197268	KIAA1467	0.000188301	0.836	156	0
ENSP00000198536	PILRA	1.22e-05	0.916	179	0.479956
ENSP00000198765	CPNE3	0.000202482	0.388	440	0.413309
ENSP00000198767	RRN3	0.000153051	0.376	998	0.866905
ENSP00000198801	MOGAT2	1.91e-05	0.748	504	0.316539
ENSP00000199280	AQP2	1.88e-05	0.594	817	0.609749
ENSP00000199320	DIMT1	1.55e-05	0.902	774	0.886175
ENSP00000199389	EIF2AK1	3.18e-05	0.546	585	0.549511
ENSP00000199447	NME8	1.14e-05	0.938	683	0.89379
ENSP00000199706	MRPL28	4.69e-05	0.798	919	0.569084
ENSP00000199708	HBQ1	3.51e-05	0.828	436	0.273904
ENSP00000199764	CEACAM6	2.87e-05	0.31	405	0.561287
ENSP00000199814	RBM22	2.49e-05	0.678	756	0.75158
ENSP00000199936	HSD17B2	2.62e-05	0.606	836	0.439842
ENSP00000200135	ZW10	3.06e-05	0.65	959	0.649256
ENSP00000200181	ITGB4	0.000106354	0.372	960	0.867031
ENSP00000200453	PPP1R15A	3.7e-05	0.296	900	0.75495
ENSP00000200457	TRIP6	4.26e-05	0.64	978	0.667461
ENSP00000200557	ADAM11	2.38e-05	0.806	220	0.324097
ENSP00000200652	SLC22A4	3.9e-05	0.316	754	0.517533
ENSP00000200676	CETP	2.38e-05	0.634	466	0.63936
ENSP00000200691	MT3	1.88e-05	0.896	347	0.323879
ENSP00000201031	TFAP2C	0.000139688	0.366	569	0.921338
ENSP00000201586	SULT2B1	1.29e-05	0.64	589	0.895106
ENSP00000201647	EPS8L1	6.3e-05	0.302	678	0.467237
ENSP00000201979	REM1	1.14e-05	0.428	560	0.988773
ENSP00000202017	PDRG1	9.12e-05	0.646	360	0.395956
ENSP00000202556	PPP1R13B	6.45e-05	0.502	737	0.729126
ENSP00000202625	TGM6	4.08e-05	0.398	689	0.400518
ENSP00000202677	RALGAPA2	3.23e-05	0.46	456	0.408484
ENSP00000202773	RPL6	2.15e-05	0.798	994	0.927126
ENSP00000202788	-	0.000290836	0.378	724	0
ENSP00000202816	ESF1	2.4e-05	0.84	829	0.924658
ENSP00000202831	SLC24A6	4.13e-05	0.876	374	0
ENSP00000202967	SIRT4	8.3e-05	0.388	947	0.921368
ENSP00000203001	TRMT6	2.58e-05	0.784	733	0.893302
ENSP00000203407	UQCRC1	1.91e-05	0.714	999	0.73974
ENSP00000203556	GMIP	5.27e-05	0.82	645	0.542869
ENSP00000203629	LAG3	2.53e-05	0.676	585	0.66235
ENSP00000203630	MLF2	4.36e-05	0.712	680	0.290109
ENSP00000203664	OTUB2	5.87e-05	0.742	560	0.472045
ENSP00000204549	PDCD7	0.000776794	0.388	237	0.400493
ENSP00000204566	SPG21	3.61e-05	0.608	487	0.474968
ENSP00000204604	CHRD	2.45e-05	0.208	944	0.970503
ENSP00000204615	THPO	3.15e-05	0.116	980	0.948951
ENSP00000204679	GNPTG	4.94e-05	0.604	519	0.187221
ENSP00000204726	GOLGA3	0.000504363	0.382	945	0.266942
ENSP00000204961	EFNB1	3.42e-05	0.316	999	0.944968
ENSP00000205061	GLG1	3.89e-05	0.864	386	0.384029
ENSP00000205143	DLL3	2.92e-05	0.358	923	0.866196
ENSP00000205194	NAT14	0.000144438	0.908	169	0.511799
ENSP00000205214	AASDH	3.3e-05	0.56	989	0.499506
ENSP00000205386	LAMB4	3.63e-05	0.442	800	0.404602
ENSP00000205402	DLD	1.36e-05	0.826	999	0.748813
ENSP00000205557	ABCC6	4.24e-05	0.402	536	0.508917
ENSP00000205636	CMTM6	0.000436432	0.398	200	0.584485
ENSP00000205890	MYO15A	1.76e-05	0.75	875	0.678455
ENSP00000205948	APOH	3.18e-05	0.774	740	0.571551
ENSP00000206020	SPAG7	9.77e-05	0.832	606	0.272256
ENSP00000206249	ESR1	1.6e-05	0.496	999	0
ENSP00000206380	TMEM101	0.000386977	0.306	351	0.433383
ENSP00000206423	CCDC80	4.92e-05	0.142	582	0.343166
ENSP00000206474	HAUS4	0.000147911	0.826	688	0.472114
ENSP00000206513	CEBPE	3.02e-05	0.654	500	0.854872
ENSP00000206542	OSGEP	2.05e-05	0.902	890	0.384821
ENSP00000206544	SLC22A17	0.000123101	0.582	472	0.390442
ENSP00000206595	G2E3	5.55e-05	0.524	463	0.472606
ENSP00000206765	TGM1	2.92e-05	0.58	786	0.721129
ENSP00000207157	TBX15	3.07e-05	0.344	371	0.902599
ENSP00000207437	MYL6B	2.28e-05	0.812	854	0
ENSP00000207457	TEKT2	1.74e-05	0.82	311	0.412888
ENSP00000207549	UNC13D	4.07e-05	0.764	384	0.502425
ENSP00000207870	XYLB	3.23e-05	0.87	607	0.402838
ENSP00000209668	ADH1A	2.1e-05	0.37	974	0.571055
ENSP00000209718	KRT23	3.21e-05	0.54	330	0.576961
ENSP00000209728	CDC6	1.78e-05	0.468	963	0.94433
ENSP00000209873	AAAS	5.67e-05	0.668	900	0.510183
ENSP00000209875	CBX5	3.41e-05	0.53	961	0.94912
ENSP00000209884	KLHL20	4.09e-05	0.838	906	0.847543
ENSP00000209929	FMO2	2.29e-05	0.782	456	0.463352
ENSP00000210060	DHPS	1.93e-05	0.806	422	0.481227
ENSP00000210187	RAB26	6.49e-05	0.494	263	0.351463
ENSP00000210313	PSMD5	0.000137256	0.39	900	0.67889
ENSP00000210444	NANS	4.05e-05	0.566	491	0.523827
ENSP00000210633	SEMA4G	3.41e-05	0.738	397	0.659505
ENSP00000211076	TPSD1	2.32e-05	0.754	347	0.285897
ENSP00000211122	GSTA3	1.76e-05	0.906	906	0.40132
ENSP00000211287	MAPK13	1.22e-05	0.504	993	0.992817
ENSP00000211314	TMEM14A	0.00117588	0.296	159	0.628551
ENSP00000211413	PRRT1	5.98e-05	0.35	376	0.50166
ENSP00000211936	ZNF184	2.35e-05	0.538	501	0.987489
ENSP00000211998	VCL	1.71e-05	0.542	995	0.947388
ENSP00000212015	SIRT1	2.32e-05	0.452	999	0.962293
ENSP00000212355	TGFBR3	0.000173576	0.288	902	0.756721
ENSP00000214869	TMED1	7.01e-05	0.77	467	0.295023
ENSP00000215057	MZF1	2.43e-05	0.324	625	0.971443
ENSP00000215061	OCEL1	4.09e-05	0.516	414	0.470322
ENSP00000215071	PSMD8	2.8e-05	0.758	906	0.700302
ENSP00000215095	STX1B	2.24e-05	0.616	982	0.599122
ENSP00000215115	BCL7C	4.41e-05	0.406	622	0.396793
ENSP00000215368	EFNA2	3.38e-05	0.226	997	0.911868
ENSP00000215375	ATP5D	1.84e-05	0.934	860	0.710381
ENSP00000215376	C19orf26	2.65e-05	0.714	267	0
ENSP00000215479	AMELY	3.57e-05	0.364	662	0.359433
ENSP00000215530	FGF22	2.85e-05	0.332	905	0.946225
ENSP00000215531	C19orf77	0.000559144	0.864	0	0
ENSP00000215565	NDUFB7	1.82e-05	0.962	955	0.711207
ENSP00000215567	TECR	2.31e-05	0.664	900	0.40158
ENSP00000215570	TIMM13	9.25e-05	0.406	644	0.688595
ENSP00000215574	CDC34	1.58e-05	0.654	998	0.820992
ENSP00000215582	C19orf21	0.000131211	0.538	459	0
ENSP00000215587	POLR2E	1.66e-05	0.716	999	0.924591
ENSP00000215591	POLRMT	3.27e-05	0.824	402	0
ENSP00000215631	GADD45B	4.19e-05	0.418	998	0.9262
ENSP00000215637	MADCAM1	2.82e-05	0.274	863	0.81065
ENSP00000215659	MAPK12	1.23e-05	0.496	973	0.993296
ENSP00000215727	SERPIND1	2.05e-05	0.716	558	0.588926
ENSP00000215730	SNAP29	3.95e-05	0.666	941	0.703944
ENSP00000215739	LZTR1	6.84e-05	0.542	384	0.530984
ENSP00000215742	THAP7	9.5e-05	0.386	948	0.459901
ENSP00000215743	MMP11	3.38e-05	0.182	609	0.84974
ENSP00000215754	MIF	3.18e-05	0.476	565	0.916971
ENSP00000215770	DDTL	8.95e-05	0.94	0	0.30145
ENSP00000215773	DDT	4.24e-05	0.536	485	0.876441
ENSP00000215780	GSTT2	1.79e-05	0.882	584	0
ENSP00000215781	OSM	4.06e-05	0.162	981	0.906451
ENSP00000215793	SF3A1	3.17e-05	0.432	999	0.932114
ENSP00000215794	USP18	2.37e-05	0.88	488	0.608177
ENSP00000215812	SEC14L3	3.3e-05	0.702	575	0.382309
ENSP00000215829	SNRPD3	5.65e-05	0.384	996	0.93952
ENSP00000215832	MAPK1	1.3e-05	0.476	999	0
ENSP00000215838	TCN2	3.16e-05	0.372	725	0.437056
ENSP00000215855	CRYBB3	2.9e-05	0.662	664	0.425869
ENSP00000215862	MORC2	5.22e-05	0.796	357	0.366419
ENSP00000215882	SLC25A1	2.07e-05	0.61	681	0.244803
ENSP00000215885	PLA2G3	1.76e-05	0.798	906	0.250808
ENSP00000215886	LGALS2	4.27e-05	0.514	513	0.394755
ENSP00000215904	PDXP	1.82e-05	0.676	389	0.532172
ENSP00000215906	ASPHD2	5.25e-05	0.224	357	0.320353
ENSP00000215909	LGALS1	2.98e-05	0.406	859	0.872376
ENSP00000215912	PIK3IP1	2.16e-05	0.834	216	0.329871
ENSP00000215917	SRRD	5.15e-05	0.328	215	0.331078
ENSP00000215939	CRYBB1	4.23e-05	0.412	480	0.422415
ENSP00000215941	ANKRD54	2.64e-05	0.494	344	0.909063
ENSP00000215956	NHP2L1	1.61e-05	0.786	965	0
ENSP00000215957	MICALL1	4.19e-05	0.574	362	0.44944
ENSP00000215980	CENPM	3.59e-05	0.88	903	0.698768
ENSP00000216027	HSCB	1.88e-05	0.788	590	0.354055
ENSP00000216029	CBY1	5.2e-05	0.332	330	0.504191
ENSP00000216034	TOMM22	0.000133392	0.402	999	0.708701
ENSP00000216036	RTDR1	2.93e-05	0.89	647	0
ENSP00000216037	XBP1	6.85e-05	0.374	897	0.897392
ENSP00000216038	C22orf28	4.86e-05	0.638	839	0
ENSP00000216039	JOSD1	0.000282339	0.374	500	0.430068
ENSP00000216044	GTPBP1	3.75e-05	0.696	720	0.414099
ENSP00000216068	DNAL4	2.41e-05	0.496	906	0.479441
ENSP00000216071	C22orf31	1.89e-05	0.774	0	0.651295
ENSP00000216075	MIOX	3.5e-05	0.596	952	0.246417
ENSP00000216085	RHBDD3	5.26e-05	0.744	360	0.311539
ENSP00000216099	APOBEC3D	9.17e-05	0.76	722	0.675582
ENSP00000216101	RASL10A	1.25e-05	0.69	612	0.996902
ENSP00000216106	HMGXB4	2.81e-05	0.59	995	0.567785
ENSP00000216115	BIK	8.38e-05	0.672	232	0.419853
ENSP00000216117	HMOX1	3.03e-05	0.434	993	0.946754
ENSP00000216121	NIPSNAP1	5.42e-05	0.536	529	0.343334
ENSP00000216122	MCM5	1.22e-05	0.866	884	0
ENSP00000216124	ARSA	1.96e-05	0.784	749	0.377787
ENSP00000216127	RASD2	1.26e-05	0.586	856	0.995066
ENSP00000216129	TTLL12	5.67e-05	0.818	644	0.396943
ENSP00000216133	CBX7	4.14e-05	0.334	920	0.795184
ENSP00000216139	ACR	1.43e-05	0.808	538	0.28672
ENSP00000216144	CABP7	1.37e-05	0.928	575	0
ENSP00000216160	TAB1	4.61e-05	0.364	999	0.908316
ENSP00000216177	PNPLA5	3.77e-05	0.414	351	0.284978
ENSP00000216180	PNPLA3	2.25e-05	0.596	908	0.506664
ENSP00000216181	MYH9	1.46e-05	0.612	910	0.868235
ENSP00000216185	TXN2	1.28e-05	0.946	573	0.665181
ENSP00000216187	FOXRED2	5.44e-05	0.81	582	0.482808
ENSP00000216190	EIF3D	2.2e-05	0.754	999	0.917306
ENSP00000216194	ADSL	2.39e-05	0.77	833	0.607197
ENSP00000216200	PVALB	1.3e-05	0.482	739	0.979229
ENSP00000216211	UPK3A	2.08e-05	0.832	195	0.343951
ENSP00000216214	FAM118A	0.000110896	0.82	254	0.350617
ENSP00000216218	ST13	0.000208438	0.392	681	0.317696
ENSP00000216223	IL2RB	2.33e-05	0.558	997	0.935903
ENSP00000216225	RBX1	5.73e-05	0.438	999	0.868795
ENSP00000216237	L3MBTL2	4.24e-05	0.706	386	0.807226
ENSP00000216241	CHADL	3.25e-05	0.418	684	0.9746
ENSP00000216252	PHF5A	2.16e-05	0.496	999	0.754383
ENSP00000216254	ACO2	1.6e-05	0.796	991	0.740453
ENSP00000216259	PMM1	2.81e-05	0.61	376	0.432316
ENSP00000216264	CERK	3.58e-05	0.852	935	0.513417
ENSP00000216267	BRD1	1.44e-05	0.776	996	0
ENSP00000216268	ZBED4	3.53e-05	0.648	255	0.606801
ENSP00000216271	HDAC10	1.48e-05	0.706	984	0
ENSP00000216274	RIPK3	1.31e-05	0.904	653	0.996397
ENSP00000216277	PAPOLA	8.98e-05	0.404	919	0.922537
ENSP00000216286	NID2	3.59e-05	0.318	323	0.670617
ENSP00000216294	SNAPC1	7.83e-05	0.574	927	0.594414
ENSP00000216297	SUPT16H	4.61e-05	0.406	973	0.96316
ENSP00000216330	FKBP3	1.74e-05	0.658	828	0.810884
ENSP00000216336	CTSG	1.23e-05	0.858	740	0.873422
ENSP00000216338	GZMH	1.86e-05	0.802	216	0.252656
ENSP00000216341	GZMB	1.58e-05	0.62	991	0.934539
ENSP00000216361	COCH	2.64e-05	0.718	359	0.479764
ENSP00000216366	AP4S1	5.23e-05	0.42	503	0.473844
ENSP00000216367	POLE2	4.14e-05	0.598	903	0.826274
ENSP00000216373	SOS2	2.52e-05	0.402	911	0.834369
ENSP00000216392	PYGL	2.63e-05	0.66	965	0.627363
ENSP00000216410	GNPNAT1	2.11e-05	0.824	956	0.318326
ENSP00000216416	CNIH	2.86e-05	0.382	597	0
ENSP00000216420	CGRRF1	0.000163178	0.856	207	0.601108
ENSP00000216442	ATP6V1D	0.000133261	0.172	416	0.518812
ENSP00000216445	C14orf105	6.14e-05	0.52	265	0.622847
ENSP00000216446	PLEK2	0.000167625	0.8	211	0.45771
ENSP00000216452	PIGH	9.51e-05	0.608	374	0.245114
ENSP00000216455	PSMA3	2.11e-05	0.564	997	0.698908
ENSP00000216465	GSTZ1	1.6e-05	0.92	392	0.571582
ENSP00000216468	TMED8	6.47e-05	0.224	531	0.536003
ENSP00000216471	SAMD15	3.06e-05	0.65	0	0.908283
ENSP00000216479	AHSA1	2.82e-05	0.706	979	0.391767
ENSP00000216484	SPTLC2	2.13e-05	0.824	806	0.517439
ENSP00000216487	RIN3	4.97e-05	0.262	435	0.270651
ENSP00000216489	ALKBH1	4.1e-05	0.89	566	0.169937
ENSP00000216500	DHRS7	3.37e-05	0.902	245	0.641862
ENSP00000216513	SIX4	3.61e-05	0.494	323	0.938717
ENSP00000216540	SLC10A1	2.04e-05	0.682	515	0.398299
ENSP00000216554	EIF5	7.97e-05	0.394	999	0.936744
ENSP00000216602	ZFYVE21	0.000168223	0.652	893	0.401381
ENSP00000216629	BDKRB1	2.04e-05	0.686	907	0.828234
ENSP00000216714	APEX1	1.81e-05	0.478	873	0.789365
ENSP00000216727	PABPN1	6.02e-05	0.41	942	0.93795
ENSP00000216733	EFS	8.12e-05	0.534	743	0.443045
ENSP00000216774	SRP54	2.1e-05	0.512	956	0.822952
ENSP00000216775	CPNE6	3.9e-05	0.406	444	0
ENSP00000216780	PCK2	2.74e-05	0.486	983	0.841304
ENSP00000216797	NFKBIA	2.79e-05	0.408	996	0.960654
ENSP00000216799	EMC9	2.39e-05	0.828	370	0.332774
ENSP00000216802	PSME2	2.96e-05	0.92	903	0.715831
ENSP00000216807	BRMS1L	6.26e-05	0.522	955	0.882338
ENSP00000216832	PNN	7.06e-05	0.566	607	0.684823
ENSP00000216840	RABGGTA	6.27e-05	0.608	684	0.388228
ENSP00000216862	CYP24A1	2.83e-05	0.636	925	0.584132
ENSP00000216911	AURKA	1.84e-05	0.584	998	0.816245
ENSP00000216923	ZFP64	2.19e-05	0.436	501	0.96825
ENSP00000216951	GSS	2.51e-05	0.898	949	0.504904
ENSP00000216962	PYGB	2.37e-05	0.71	968	0.60041
ENSP00000216968	PROCR	5.94e-05	0.756	445	0.266753
ENSP00000217026	MYBL2	1.31e-05	0.442	977	0
ENSP00000217043	R3HDML	2.74e-05	0.732	250	0.447343
ENSP00000217073	PABPC1L	3.08e-05	0.448	661	0.891702
ENSP00000217086	SALL4	0.000128861	0.38	982	0.963523
ENSP00000217109	CSTF1	4.27e-05	0.59	929	0.886642
ENSP00000217121	TPD52L2	7.02e-05	0.658	388	0.27663
ENSP00000217130	ZNF512B	2.07e-05	0.514	501	0.975349
ENSP00000217131	CTSZ	2.79e-05	0.854	610	0.414917
ENSP00000217133	TUBB1	1.24e-05	0.946	809	0.802175
ENSP00000217159	SLCO4A1	4.16e-05	0.84	198	0.344794
ENSP00000217169	BIRC7	4.25e-05	0.626	419	0.631288
ENSP00000217173	UBOX5	4.22e-05	0.54	882	0.608414
ENSP00000217182	EEF1A2	1.37e-05	0.778	809	0.78807
ENSP00000217185	PTK6	1.39e-05	0.882	636	0.995645
ENSP00000217188	SRMS	1.35e-05	0.88	636	0.99613
ENSP00000217195	C20orf27	0.000152728	0.602	577	0.526883
ENSP00000217233	TRIB3	2.37e-05	0.472	923	0.993831
ENSP00000217244	CSNK2A1	1.89e-05	0.478	999	0
ENSP00000217246	MACROD2	5.22e-05	0.718	304	0.281274
ENSP00000217254	SLC52A3	4.82e-05	0.28	561	0.442316
ENSP00000217260	RSPO4	1.77e-05	0.842	582	0.239762
ENSP00000217270	PROKR2	2.07e-05	0.804	989	0.882037
ENSP00000217289	FERMT1	5.1e-05	0.402	370	0.296989
ENSP00000217299	XKR7	2.86e-05	0.742	329	0
ENSP00000217305	PDYN	1.68e-05	0.828	900	0.766074
ENSP00000217320	TLDC2	0.000191311	0.15	516	0.705437
ENSP00000217372	CDK5RAP1	2.61e-05	0.642	457	0.599617
ENSP00000217381	SNTA1	1.96e-05	0.764	942	0.605994
ENSP00000217386	OXT	1.5e-05	0.582	922	0.825892
ENSP00000217407	LBP	2.32e-05	0.578	920	0.712392
ENSP00000217420	SLC32A1	3.32e-05	0.438	965	0.553392
ENSP00000217423	CST4	3.53e-05	0.862	360	0.304568
ENSP00000217426	AHCY	2.27e-05	0.534	949	0.735463
ENSP00000217428	SPINT3	4.12e-05	0.378	215	0.694253
ENSP00000217429	FAM83D	6.21e-05	0.622	342	0.600591
ENSP00000217446	PIGU	4.54e-05	0.74	232	0.200524
ENSP00000217455	ACOT8	2.1e-05	0.596	528	0.512742
ENSP00000217456	APMAP	4.93e-05	0.788	230	0.231182
ENSP00000217515	TXNL1	3.38e-05	0.796	973	0.586967
ENSP00000217652	MYL12A	2.36e-05	0.47	978	0.789976
ENSP00000217740	RNF125	3.93e-05	0.888	215	0.281215
ENSP00000217893	TAF9	2.38e-05	0.7	991	0.937706
ENSP00000217901	IDH3G	2.87e-05	0.246	929	0.703026
ENSP00000217909	SLC25A43	0.000582371	0.288	599	0.376971
ENSP00000217939	MXRA5	2.56e-05	0.494	684	0.950513
ENSP00000217958	PSMD10	1.93e-05	0.754	909	0.854074
ENSP00000217961	STS	1.81e-05	0.418	751	0.750247
ENSP00000217964	TBL1X	6.19e-05	0.376	999	0.9281
ENSP00000217971	PGRMC1	2.19e-05	0.794	903	0.441241
ENSP00000217999	RHOXF1	3.01e-05	0.474	402	0.962936
ENSP00000218006	GUCY2F	1.57e-05	0.528	904	0.992968
ENSP00000218008	ATP1B4	4.8e-05	0.4	464	0.669687
ENSP00000218032	TLR8	2.18e-05	0.524	472	0.84171
ENSP00000218056	WDR13	5.05e-05	0.406	370	0.369015
ENSP00000218099	F9	1.61e-05	0.802	398	0.584022
ENSP00000218104	ABCD1	4.35e-05	0.242	557	0.594752
ENSP00000218147	BCORL1	0.000123453	0.384	770	0.556087
ENSP00000218176	KCND1	2.69e-05	0.514	573	0.661915
ENSP00000218197	SLC25A14	4.11e-05	0.41	359	0.337505
ENSP00000218224	PQBP1	3.7e-05	0.572	415	0.510539
ENSP00000218230	PCSK1N	2.95e-05	0.8	150	0.652761
ENSP00000218249	RAB40AL	2.58e-05	0.436	764	0.641032
ENSP00000218316	GPR50	2.79e-05	0.266	425	0.680104
ENSP00000218340	RP2	9.62e-05	0.452	537	0.3829
ENSP00000218343	PHF16	0.000187295	0.372	482	0
ENSP00000218348	USP11	3.24e-05	0.754	946	0.635112
ENSP00000218364	HTATSF1	4.41e-05	0.386	974	0.804831
ENSP00000218388	TIMP1	3.54e-05	0.38	956	0.962872
ENSP00000218439	MAGED2	4.11e-05	0.586	743	0.513281
ENSP00000218516	GLA	2.07e-05	0.852	165	0.264699
ENSP00000218548	ATP12A	2.65e-05	0.502	833	0.689585
ENSP00000218652	NDFIP2	0.000135707	0.442	685	0.307727
ENSP00000218721	MLNR	1.67e-05	0.91	915	0.865795
ENSP00000218758	ACP5	2.83e-05	0.582	900	0.923409
ENSP00000218867	SGCG	2.04e-05	0.248	873	0.632723
ENSP00000218894	SUPT20H	4.22e-05	0.458	422	0.667352
ENSP00000219022	OLFM4	2.91e-05	0.358	330	0.234658
ENSP00000219054	ACSM2A	2.78e-05	0.626	585	0.601154
ENSP00000219066	NTHL1	2.09e-05	0.86	601	0.765035
ENSP00000219069	ZNF263	2.41e-05	0.456	501	0.983577
ENSP00000219070	MMP2	2.83e-05	0.39	995	0.962538
ENSP00000219091	ZNF205	2.65e-05	0.432	501	0.98606
ENSP00000219097	ORC6	3.84e-05	0.738	409	0.81826
ENSP00000219139	C16orf70	0.000121762	0.738	691	0.486584
ENSP00000219150	CORO1A	4.07e-05	0.164	732	0.526531
ENSP00000219162	MT4	1.56e-05	0.914	0	0.380001
ENSP00000219168	LYRM1	7.11e-05	0.372	219	0.452653
ENSP00000219169	NUTF2	0.000111446	0.386	970	0.676775
ENSP00000219172	CENPT	4.38e-05	0.868	911	0
ENSP00000219197	CBLN1	5.35e-05	0.186	352	0.429399
ENSP00000219204	ARL2BP	0.00108119	0.372	650	0.597942
ENSP00000219207	PLLP	5.54e-05	0.252	506	0.276711
ENSP00000219235	CCL22	4.54e-05	0.15	725	0.804217
ENSP00000219240	DHODH	2.1e-05	0.416	591	0.793151
ENSP00000219244	CCL17	3.71e-05	0.204	771	0.794604
ENSP00000219252	POLR2C	1.27e-05	0.922	996	0.928449
ENSP00000219255	PARD6A	2.26e-05	0.604	966	0.878773
ENSP00000219271	MMP15	6.27e-05	0.33	672	0.795028
ENSP00000219281	USB1	0.000993297	0.29	301	0.358472
ENSP00000219299	CCDC113	1.06e-05	0.886	0	0.546048
ENSP00000219302	NME3	1.41e-05	0.918	900	0.963942
ENSP00000219313	PSMD7	2.27e-05	0.826	942	0.681415
ENSP00000219315	SETD6	0.000148712	0.774	373	0.393229
ENSP00000219320	SLC38A7	2.89e-05	0.512	720	0.688304
ENSP00000219334	SMPD3	2.76e-05	0.628	936	0.580346
ENSP00000219343	SLC7A6	3.09e-05	0.722	357	0.538014
ENSP00000219345	PLA2G15	2.94e-05	0.656	561	0.33638
ENSP00000219368	FA2H	1.98e-05	0.858	606	0.516393
ENSP00000219400	CMC2	9.34e-05	0.586	538	0.518876
ENSP00000219406	PDIA2	1.39e-05	0.806	857	0.58909
ENSP00000219409	ARHGDIG	2.97e-05	0.622	916	0.562469
ENSP00000219431	MPG	2.01e-05	0.966	634	0.315822
ENSP00000219454	WFDC1	3e-05	0.406	201	0.769881
ENSP00000219473	USP10	2.45e-05	0.518	968	0.816125
ENSP00000219476	TSC2	5.81e-05	0.448	999	0.944099
ENSP00000219478	ZNF500	2.62e-05	0.448	501	0.990388
ENSP00000219479	NME4	1.62e-05	0.882	900	0.968692
ENSP00000219481	DECR2	2.84e-05	0.906	427	0.469512
ENSP00000219548	STUB1	2.26e-05	0.514	962	0.934904
ENSP00000219551	RHBDL1	1.65e-05	0.59	768	0.828076
ENSP00000219593	ZP2	2.23e-05	0.502	301	0
ENSP00000219596	MEFV	2.44e-05	0.9	800	0.499496
ENSP00000219599	CRYM	2.29e-05	0.504	297	0.239
ENSP00000219611	SOLH	1.39e-05	0.964	782	0
ENSP00000219660	AQP8	1.89e-05	0.55	814	0.768931
ENSP00000219689	USP31	2.94e-05	0.526	536	0.363691
ENSP00000219700	HMOX2	1.73e-05	0.678	934	0.92198
ENSP00000219746	TOX3	1.42e-05	0.966	566	0.943844
ENSP00000219782	MAZ	2.28e-05	0.486	777	0.975284
ENSP00000219789	CDIPT	1.67e-05	0.752	920	0.50096
ENSP00000219794	BCKDK	2.81e-05	0.546	284	0.462527
ENSP00000219833	SLC6A2	1.74e-05	0.822	477	0.442801
ENSP00000219837	KNOP1	9.84e-05	0.68	225	0.698739
ENSP00000219905	MGA	4.53e-05	0.7	224	0.948044
ENSP00000220058	MTFMT	5.6e-05	0.378	947	0.654722
ENSP00000220062	RASL12	1.27e-05	0.602	559	0.994664
ENSP00000220166	CTSH	3.23e-05	0.774	398	0.368293
ENSP00000220244	KIAA1199	1.59e-05	0.9	163	0
ENSP00000220325	EHD4	4.52e-05	0.766	901	0.308208
ENSP00000220420	TGM5	8.87e-05	0.776	502	0.243675
ENSP00000220429	GABPB1	2.64e-05	0.662	437	0.96932
ENSP00000220478	SCG3	1.3e-05	0.908	977	0.378178
ENSP00000220496	DNAJC17	3.06e-05	0.712	426	0.719289
ENSP00000220507	RHOV	1.29e-05	0.682	936	0.985337
ENSP00000220509	VPS18	9.5e-05	0.142	775	0.6001
ENSP00000220514	OIP5	3.63e-05	0.944	900	0.636718
ENSP00000220531	BLOC1S6	0.000266761	0.294	992	0.503161
ENSP00000220562	EXTL3	1.62e-05	0.494	497	0.537906
ENSP00000220584	FDFT1	2.42e-05	0.688	980	0.728162
ENSP00000220592	AGO2	3.46e-05	0.408	994	0.940758
ENSP00000220597	PAG1	3.45e-05	0.522	993	0.52339
ENSP00000220616	TG	1.99e-05	0.428	951	0.862355
ENSP00000220659	BRF2	1.46e-05	0.94	992	0
ENSP00000220669	ZFAND1	0.000217652	0.4	205	0.35586
ENSP00000220676	RP1	2.9e-05	0.294	626	0.665897
ENSP00000220751	RIPK2	1.44e-05	0.64	921	0.992599
ENSP00000220763	CPQ	5.09e-05	0.706	244	0.256706
ENSP00000220764	DECR1	1.66e-05	0.524	929	0.863718
ENSP00000220772	SFRP1	2.61e-05	0.166	975	0.97678
ENSP00000220809	PLAT	2.05e-05	0.58	685	0.782938
ENSP00000220812	DKK4	4.97e-05	0.354	909	0.814609
ENSP00000220822	GDAP1	4.58e-05	0.826	644	0.346747
ENSP00000220849	EIF3E	2.83e-05	0.68	999	0.914219
ENSP00000220853	EMC2	6.38e-05	0.878	268	0.333039
ENSP00000220913	CHRAC1	3.66e-05	0.452	984	0
ENSP00000220931	NCALD	2.12e-05	0.552	954	0.54788
ENSP00000220940	GML	1.08e-05	0.946	250	0.286822
ENSP00000220966	PYCRL	1.95e-05	0.886	900	0.411026
ENSP00000221086	MTMR9	0.000240363	0.374	976	0.786054
ENSP00000221114	DCTN6	4.18e-05	0.686	942	0.331126
ENSP00000221130	GSR	2.58e-05	0.548	857	0.789587
ENSP00000221132	TNFRSF10A	3.95e-05	0.614	800	0.913561
ENSP00000221166	NEFM	3.99e-05	0.566	584	0.662331
ENSP00000221167	-	3.09e-05	0.584	866	0
ENSP00000221200	KCTD9	0.000296896	0.372	308	0.412166
ENSP00000221204	-	4.27e-05	0.482	746	0
ENSP00000221232	CNOT3	2.19e-05	0.784	817	0.598394
ENSP00000221233	EXOSC5	6.65e-05	0.388	967	0.90337
ENSP00000221265	PAF1	2.46e-05	0.668	999	0.742289
ENSP00000221283	STXBP2	2.5e-05	0.646	685	0.898999
ENSP00000221307	CYP4F3	2.56e-05	0.892	498	0.796935
ENSP00000221315	ZNF432	2.75e-05	0.5	501	0.991569
ENSP00000221327	ZNF180	3.03e-05	0.452	501	0.996002
ENSP00000221347	FCGBP	2.3e-05	0.752	301	0
ENSP00000221399	TULP2	0.000237057	0.32	446	0.315543
ENSP00000221403	DHDH	1.11e-05	0.958	586	0
ENSP00000221418	ECH1	3.79e-05	0.534	644	0.58941
ENSP00000221419	HNRNPL	0.000107196	0.37	985	0.928824
ENSP00000221421	LHB	2.03e-05	0.704	889	0.79968
ENSP00000221444	KCNA7	2.32e-05	0.538	946	0.724457
ENSP00000221452	RELB	3.54e-05	0.336	946	0.948836
ENSP00000221455	CLASRP	2.26e-05	0.596	757	0.291811
ENSP00000221459	LIN7B	4.06e-05	0.198	879	0.240516
ENSP00000221462	PPP1R37	2.76e-05	0.786	323	0.505554
ENSP00000221466	FCGRT	2.63e-05	0.614	331	0.254458
ENSP00000221476	CKM	7.6e-05	0.376	956	0.581598
ENSP00000221480	PEX11G	5.03e-05	0.822	378	0.749074
ENSP00000221485	SLC17A7	2.35e-05	0.33	939	0.738657
ENSP00000221486	RNASEH2A	1.83e-05	0.904	615	0.817253
ENSP00000221494	SF3A2	6.75e-05	0.44	999	0.932956
ENSP00000221496	AMH	1.95e-05	0.328	931	0.971023
ENSP00000221498	DKKL1	2.63e-05	0.588	226	0.191294
ENSP00000221515	RETN	9.52e-05	0.364	891	0.874795
ENSP00000221538	RSPH6A	1.56e-05	0.9	412	0.392247
ENSP00000221543	TBC1D17	3.01e-05	0.898	439	0.51278
ENSP00000221554	CCDC130	2.25e-05	0.408	525	0.573408
ENSP00000221561	AES	6.32e-05	0.368	974	0.950158
ENSP00000221566	SGTA	1.61e-05	0.452	922	0.775956
ENSP00000221573	SNAPC2	5.25e-05	0.516	925	0.594009
ENSP00000221665	FIZ1	2.82e-05	0.444	501	0.986956
ENSP00000221671	C19orf44	0.0079834	0.742	0	0.888876
ENSP00000221700	CYP4F2	2.98e-05	0.854	492	0.775859
ENSP00000221722	ZIM2	2.74e-05	0.43	501	0
ENSP00000221730	EPHX3	3.63e-05	0.674	179	0.568952
ENSP00000221740	CASP14	5.92e-05	0.7	355	0
ENSP00000221742	SLC1A6	2.27e-05	0.468	625	0.486319
ENSP00000221797	LGALS13	3.51e-05	0.6	211	0.395143
ENSP00000221801	FBL	2.63e-05	0.442	992	0.970002
ENSP00000221804	CLC	1.56e-05	0.884	166	0.295296
ENSP00000221847	EBI3	6.13e-05	0.202	900	0.500498
ENSP00000221855	TBCB	0.00017591	0.41	468	0.309217
ENSP00000221856	FSD1	7.79e-05	0.792	607	0.403154
ENSP00000221859	POLR2I	2.32e-05	0.59	995	0.900355
ENSP00000221891	APLP1	2.1e-05	0.602	571	0.61411
ENSP00000221922	CCDC9	8.91e-05	0.768	534	0.432697
ENSP00000221930	TGFB1	2.06e-05	0.362	981	0
ENSP00000221954	CEACAM4	5.94e-05	0.37	221	0.44757
ENSP00000221957	PLIN3	0.000272813	0.158	644	0.239446
ENSP00000221972	CD79A	1.38e-05	0.654	917	0.946061
ENSP00000221973	LIM2	2.5e-05	0.554	407	0.294222
ENSP00000221978	NKG7	2.27e-05	0.844	212	0.371446
ENSP00000221980	ICAM5	3.7e-05	0.226	627	0.557729
ENSP00000221992	CEACAM5	4.34e-05	0.144	632	0.239372
ENSP00000221996	CRX	1.93e-05	0.496	927	0.959711
ENSP00000222002	SULT2A1	1.57e-05	0.85	980	0.513434
ENSP00000222005	CDC37	0.000703853	0.762	964	0.786531
ENSP00000222008	RABAC1	3.17e-05	0.754	753	0.501077
ENSP00000222032	CNFN	2.77e-05	0.668	309	0.445373
ENSP00000222033	ZNRF4	4.14e-05	0.606	159	0.435612
ENSP00000222115	HAS1	1.44e-05	0.738	538	0.727544
ENSP00000222120	RAB3D	3.34e-05	0.604	626	0.62511
ENSP00000222122	DBP	4.07e-05	0.588	158	0.632943
ENSP00000222125	CAPS	1.07e-05	0.93	381	0.995336
ENSP00000222139	EPOR	5.37e-05	0.416	999	0.93295
ENSP00000222145	RASIP1	1.82e-05	0.624	663	0.665824
ENSP00000222157	FGF21	8.88e-05	0.328	821	0.912965
ENSP00000222212	CACNG7	2.11e-05	0.478	802	0.551589
ENSP00000222214	GCDH	3.17e-05	0.716	755	0.566099
ENSP00000222219	DNASE2	3.16e-05	0.56	971	0.531027
ENSP00000222224	LENG1	0.000146593	0.298	323	0.6709
ENSP00000222247	RPL18A	2.05e-05	0.872	994	0.92369
ENSP00000222248	SLC5A5	1.47e-05	0.602	476	0.643713
ENSP00000222250	ARRDC2	3.62e-05	0.574	827	0.322843
ENSP00000222254	PIK3R2	6.21e-05	0.352	916	0.819875
ENSP00000222256	RAB3A	2.94e-05	0.356	974	0.725171
ENSP00000222266	PSENEN	2.37e-05	0.898	922	0.626996
ENSP00000222270	WBP7	2.35e-05	0.402	976	0
ENSP00000222271	COMP	1.94e-05	0.424	802	0.786719
ENSP00000222275	UPK1A	2.29e-05	0.812	175	0.480578
ENSP00000222284	TMEM147	4.64e-05	0.902	284	0.41191
ENSP00000222286	GAPDHS	1.49e-05	0.7	579	0.708439
ENSP00000222304	HAMP	2.08e-05	0.728	313	0.68433
ENSP00000222305	USF2	3.58e-05	0.506	896	0.9435
ENSP00000222307	KXD1	5.34e-05	0.768	565	0.347744
ENSP00000222308	FKBP8	1.86e-05	0.704	995	0.67597
ENSP00000222329	ERF	7.44e-05	0.406	588	0.853048
ENSP00000222330	GSK3A	1.52e-05	0.422	989	0.987839
ENSP00000222345	SIPA1L3	0.000239536	0.438	224	0.369572
ENSP00000222374	CADM4	8.09e-05	0.732	483	0.319099
ENSP00000222381	PON1	2.13e-05	0.326	407	0.670015
ENSP00000222382	CYP3A43	1.27e-05	0.936	333	0.700913
ENSP00000222388	ABCF2	2.44e-05	0.726	720	0.704458
ENSP00000222390	HGF	2.94e-05	0.1	999	0.947245
ENSP00000222399	LAMB1	3.48e-05	0.616	904	0.760441
ENSP00000222402	UBE2D4	1.9e-05	0.72	607	0.716604
ENSP00000222462	WNT16	2.9e-05	0.148	962	0.985169
ENSP00000222481	CPA2	1.66e-05	0.844	171	0.298455
ENSP00000222482	CPA4	3.51e-05	0.81	386	0.321026
ENSP00000222511	GTPBP10	2.14e-05	0.884	363	0.739378
ENSP00000222543	TFPI2	3.49e-05	0.262	801	0.703845
ENSP00000222547	BET1	3.06e-05	0.4	807	0.645199
ENSP00000222553	NAMPT	7.43e-05	0.414	450	0.736429
ENSP00000222567	TWISTNB	6.56e-05	0.288	900	0.873235
ENSP00000222572	PON2	6.11e-05	0.634	300	0.509377
ENSP00000222573	ITGB8	4.36e-05	0.468	826	0.717639
ENSP00000222584	SP4	2.4e-05	0.434	687	0.964299
ENSP00000222598	DLX5	2.71e-05	0.476	748	0.985884
ENSP00000222673	OGDH	2.32e-05	0.55	998	0.730693
ENSP00000222674	NPVF	2.72e-05	0.64	191	0.356006
ENSP00000222693	CAV2	4.12e-05	0.542	912	0.778073
ENSP00000222718	HOXA2	4.04e-05	0.162	883	0.983194
ENSP00000222725	LFNG	2.21e-05	0.382	919	0.924708
ENSP00000222728	HOXA6	5.29e-05	0.632	281	0.971279
ENSP00000222747	TSPAN12	2.18e-05	0.706	594	0.26392
ENSP00000222753	HOXA13	5.44e-05	0.374	866	0.967722
ENSP00000222792	CHN2	2.09e-05	0.376	494	0.645358
ENSP00000222800	ABHD11	1.38e-05	0.942	489	0.236678
ENSP00000222803	FKBP14	4.7e-05	0.288	576	0.449535
ENSP00000222812	STX1A	1.84e-05	0.698	929	0.586255
ENSP00000222823	NOD1	1.98e-05	0.898	499	0.831264
ENSP00000222902	CCL24	0.0174619	0.07	167	0.661647
ENSP00000222968	PDAP1	8.27e-05	0.808	411	0.375488
ENSP00000222969	BUD31	2.54e-05	0.59	829	0.730909
ENSP00000222982	CYP3A5	1.13e-05	0.94	923	0.618823
ENSP00000222990	SNX8	0.00011609	0.144	589	0.824009
ENSP00000223023	WASL	7.06e-05	0.284	997	0.804681
ENSP00000223026	HYAL4	2.76e-05	0.718	500	0.350517
ENSP00000223029	AIMP2	4.23e-05	0.682	999	0.479091
ENSP00000223051	TFR2	4.49e-05	0.704	440	0.44118
ENSP00000223054	MOSPD3	3.08e-05	0.73	796	0.557128
ENSP00000223061	PCOLCE	4.1e-05	0.314	328	0.651112
ENSP00000223073	RBM28	2.29e-05	0.87	997	0.939043
ENSP00000223095	SERPINE1	3.12e-05	0.432	947	0.956214
ENSP00000223114	MOGAT3	0.000260732	0.138	954	0.399558
ENSP00000223122	C1GALT1	2.85e-05	0.584	955	0.653977
ENSP00000223127	PLOD3	4e-05	0.726	647	0.278737
ENSP00000223129	RPA3	5e-05	0.548	908	0.847184
ENSP00000223136	FIS1	2.93e-05	0.826	719	0.57509
ENSP00000223167	MYL10	1.63e-05	0.624	919	0.727814
ENSP00000223190	NRF1	0.000140993	0.42	947	0.825697
ENSP00000223208	CEP41	3.11e-05	0.742	208	0.406256
ENSP00000223210	ZNF862	2.48e-05	0.484	501	0.987555
ENSP00000223215	MEST	1.97e-05	0.614	870	0.458509
ENSP00000223271	RARRES2	3.23e-05	0.616	821	0.43997
ENSP00000223273	YAE1D1	1.71e-05	0.934	0	0.703333
ENSP00000223293	GIMAP2	2.73e-05	0.716	159	0.47637
ENSP00000223321	PSMA2	1.92e-05	0.87	989	0.69901
ENSP00000223324	MRPL32	1.8e-05	0.804	974	0.777327
ENSP00000223336	COA1	0.000289502	0.902	0	0.618135
ENSP00000223357	AEBP1	2.33e-05	0.762	195	0.219795
ENSP00000223364	MYL7	1.76e-05	0.532	919	0.723628
ENSP00000223366	GCK	1.44e-05	0.596	900	0.967013
ENSP00000223368	BCL7B	2.46e-05	0.698	555	0.381381
ENSP00000223369	YKT6	5.18e-05	0.21	997	0.746542
ENSP00000223398	CLIP2	2.09e-05	0.894	326	0.563145
ENSP00000223428	ZNF510	2.94e-05	0.456	501	0.99578
ENSP00000223459	ZNF688	3.15e-05	0.444	501	0.996172
ENSP00000223500	CHMP5	1.42e-05	0.896	998	0
ENSP00000223528	FKTN	2.64e-05	0.514	488	0.364507
ENSP00000223642	C5	3.59e-05	0.88	902	0.848067
ENSP00000223795	TNFSF8	3.84e-05	0.64	349	0.586613
ENSP00000223862	RLN1	2.24e-05	0.772	573	0.361909
ENSP00000223864	PLGRKT	3.46e-05	0.642	607	0.418578
ENSP00000224073	EDF1	3.36e-05	0.624	980	0.585039
ENSP00000224181	C8G	2.79e-05	0.718	163	0.577692
ENSP00000224237	VIM	2.42e-05	0.266	679	0.898969
ENSP00000224337	BLNK	2.34e-05	0.632	810	0.726745
ENSP00000224356	CYP26A1	2.79e-05	0.598	963	0.664414
ENSP00000224600	RBP3	9.28e-05	0.262	483	0
ENSP00000224756	CCSER2	5.26e-05	0.502	243	0.445039
ENSP00000224764	-	5.54e-05	0.122	996	0
ENSP00000224784	ACTA2	1.5e-05	0.476	798	0.971748
ENSP00000224807	SFXN3	0.000423538	0.392	478	0.292559
ENSP00000224862	FBXL15	7.76e-05	0.536	999	0.466858
ENSP00000224950	OBFC1	4.22e-05	0.548	999	0.899795
ENSP00000225174	PPIF	1.62e-05	0.7	970	0.684098
ENSP00000225235	TBC1D12	2.21e-05	0.552	214	0.484021
ENSP00000225245	CCL3	2.04e-05	0.426	916	0
ENSP00000225275	MPO	3.67e-05	0.476	902	0.270752
ENSP00000225276	ST6GALNAC2	3.65e-05	0.246	907	0.761742
ENSP00000225296	DHX33	8.52e-05	0.398	669	0.964411
ENSP00000225298	UTP18	1.61e-05	0.954	829	0.945564
ENSP00000225328	P2RX5	8.19e-05	0.936	0	0.285827
ENSP00000225371	EPX	1.98e-05	0.384	360	0.631576
ENSP00000225387	CRYBA1	4.56e-05	0.198	416	0.666373
ENSP00000225388	NUFIP2	0.00034409	0.416	502	0.547604
ENSP00000225396	TADA2A	1.52e-05	0.386	728	0
ENSP00000225402	AATF	1.79e-05	0.646	926	0
ENSP00000225410	ZNHIT3	3.63e-05	0.29	463	0
ENSP00000225426	PSMB3	7.04e-05	0.222	998	0
ENSP00000225428	CWC25	3.61e-05	0.24	842	0
ENSP00000225430	RPL19	6.34e-05	0.384	994	0.854038
ENSP00000225474	CSF3	1.97e-05	0.366	907	0.956602
ENSP00000225504	SUPT4H1	2.67e-05	0.784	959	0.952152
ENSP00000225512	WNT3	2.55e-05	0.164	987	0.990545
ENSP00000225519	SHPK	2.08e-05	0.848	791	0.694492
ENSP00000225525	TAX1BP3	6.36e-05	0.826	926	0.280471
ENSP00000225538	P2RX1	2.37e-05	0.452	389	0.508177
ENSP00000225567	GOSR2	5.64e-05	0.144	910	0.58972
ENSP00000225573	PNPO	0.000247251	0.386	511	0.265236
ENSP00000225576	TVP23C	6.37e-05	0.58	813	0.336921
ENSP00000225577	RPS6KB1	1.93e-05	0.518	999	0
ENSP00000225603	CBX1	5.11e-05	0.41	995	0.940537
ENSP00000225609	PIGL	2.19e-05	0.774	489	0.215635
ENSP00000225614	GALK1	4.1e-05	0.294	740	0.491621
ENSP00000225648	HOXB6	3.06e-05	0.226	315	0.973629
ENSP00000225655	PFN1	5.6e-05	0.382	904	0.745233
ENSP00000225665	SLC25A11	4.01e-05	0.712	373	0.385701
ENSP00000225688	RASD1	1.51e-05	0.65	843	0.988931
ENSP00000225698	C1QBP	1.57e-05	0.678	911	0.874493
ENSP00000225719	CPD	0.000584251	0.394	347	0.299204
ENSP00000225724	GOSR1	8.04e-05	0.154	947	0.657565
ENSP00000225726	CCDC47	7.16e-05	0.582	548	0.372481
ENSP00000225728	MED31	3.81e-05	0.436	998	0.930773
ENSP00000225729	DRG2	2.92e-05	0.904	873	0.624852
ENSP00000225737	AKAP10	2.54e-05	0.562	573	0.330363
ENSP00000225740	ALDH3A1	1.53e-05	0.86	923	0.770602
ENSP00000225777	SYNGR2	9.99e-05	0.692	475	0.428964
ENSP00000225805	C17orf75	1.89e-05	0.846	0	0.541039
ENSP00000225823	ASIC2	3.2e-05	0.178	333	0.568428
ENSP00000225831	CCL2	1.78e-05	0.522	989	0.966909
ENSP00000225844	CCL13	5.59e-05	0.072	803	0.713661
ENSP00000225873	PEX12	2.3e-05	0.794	763	0.68064
ENSP00000225893	HNF1B	2.34e-05	0.262	973	0
ENSP00000225916	KAT2A	1.39e-05	0.796	988	0
ENSP00000225927	NAGLU	6.31e-05	0.604	596	0.227725
ENSP00000225941	ABI3	2.16e-05	0.358	714	0.677246
ENSP00000225964	COL1A1	4.34e-05	0.35	957	0.962747
ENSP00000225969	MRPL27	1.82e-05	0.83	712	0.6888
ENSP00000225972	LRRC59	5.54e-05	0.848	497	0.559955
ENSP00000225983	HDAC5	2.35e-05	0.446	998	0
ENSP00000225992	PPY	1.98e-05	0.604	900	0.765214
ENSP00000226004	DUSP3	6.05e-05	0.432	891	0.925724
ENSP00000226021	CACNG1	2.67e-05	0.582	800	0.64948
ENSP00000226067	HLF	3.85e-05	0.236	380	0.790897
ENSP00000226091	EFNB3	3.35e-05	0.16	994	0.904964
ENSP00000226105	RANGRF	7.16e-05	0.838	848	0.22909
ENSP00000226193	RCVRN	1.87e-05	0.45	588	0.648334
ENSP00000226209	MYH3	1.54e-05	0.806	722	0
ENSP00000226218	SEBOX	2.04e-05	0.326	746	0
ENSP00000226225	TNFAIP1	4.71e-05	0.4	904	0.314973
ENSP00000226230	TMEM97	3.27e-05	0.646	252	0.37317
ENSP00000226247	FOXN1	1.33e-05	0.87	614	0
ENSP00000226253	ALDOC	2.19e-05	0.848	547	0.569301
ENSP00000226279	CD38	1.67e-05	0.484	912	0.875306
ENSP00000226284	IBSP	2.76e-05	0.452	873	0.926738
ENSP00000226299	LAP3	1.61e-05	0.852	900	0.488641
ENSP00000226317	CXCL6	1.46e-05	0.88	948	0.858283
ENSP00000226319	PHF17	4.09e-05	0.48	522	0
ENSP00000226355	AFM	3.4e-05	0.486	354	0.543832
ENSP00000226382	PHOX2B	2.94e-05	0.474	616	0.853992
ENSP00000226413	GNRHR	2.18e-05	0.426	970	0.84337
ENSP00000226432	CWH43	3.88e-05	0.696	316	0.245914
ENSP00000226444	SULT1E1	2.27e-05	0.384	329	0.51216
ENSP00000226460	SMR3A	1.44e-05	0.874	0	0.499009
ENSP00000226524	PF4V1	1.86e-05	0.862	511	0.401875
ENSP00000226574	NFKB1	1.78e-05	0.408	999	0
ENSP00000226578	MANBA	1.58e-05	0.818	378	0.317995
ENSP00000226730	IL2	2.68e-05	0.436	993	0.971788
ENSP00000226760	WFS1	2.52e-05	0.876	831	0.36952
ENSP00000226798	FRG1	2.98e-05	0.536	587	0.383863
ENSP00000226840	AADAT	3.56e-05	0.824	400	0.309077
ENSP00000226951	CLNK	3.46e-05	0.526	155	0.405584
ENSP00000227065	FAM149A	2.45e-05	0.764	165	0.393481
ENSP00000227135	SPA17	4.56e-05	0.86	499	0.401506
ENSP00000227155	CD82	2.48e-05	0.494	863	0.936824
ENSP00000227163	SPI1	4.46e-05	0.338	982	0.973214
ENSP00000227251	CRYAB	2.35e-05	0.388	822	0.753838
ENSP00000227256	DBX1	3.24e-05	0.322	582	0
ENSP00000227322	ZNF259	9.09e-05	0.388	922	0
ENSP00000227348	CRTAM	2.96e-05	0.632	812	0.371172
ENSP00000227349	C11orf63	0.00100147	0.61	0	0.813569
ENSP00000227378	HSPA8	1.87e-05	0.536	972	0.830087
ENSP00000227451	DTX4	5.31e-05	0.574	960	0.291801
ENSP00000227471	UNC93B1	3.55e-05	0.94	937	0.517427
ENSP00000227474	PUS3	2.06e-05	0.786	455	0.772957
ENSP00000227495	ST3GAL4	3.91e-05	0.664	915	0.74251
ENSP00000227507	CCND1	2.36e-05	0.414	996	0
ENSP00000227520	CCDC86	9.4e-05	0.694	459	0.585024
ENSP00000227524	PRPF19	1.86e-05	0.596	983	0.939769
ENSP00000227525	TMEM109	3.69e-05	0.942	150	0.453444
ENSP00000227618	ANAPC15	2.39e-05	0.684	900	0.352432
ENSP00000227638	PANX1	6.44e-05	0.826	901	0.390054
ENSP00000227665	APOA5	2.18e-05	0.71	900	0.563657
ENSP00000227667	APOC3	2.78e-05	0.724	919	0.759198
ENSP00000227752	IL10RA	3.82e-05	0.688	999	0.839171
ENSP00000227756	GALNT18	3.08e-05	0.482	909	0.367247
ENSP00000227758	BIRC2	5.24e-05	0.412	948	0.929645
ENSP00000227880	SLC15A3	3.21e-05	0.868	381	0.245647
ENSP00000227918	SCGB2A2	1.33e-05	0.924	161	0.421019
ENSP00000228027	DGAT2	2.66e-05	0.792	905	0.631306
ENSP00000228136	C11orf58	0.000145933	0.528	530	0.374648
ENSP00000228251	YBX3	6.92e-05	0.432	994	0.816943
ENSP00000228280	KITLG	2.63e-05	0.394	938	0.957179
ENSP00000228284	SART3	2.83e-05	0.788	603	0.882473
ENSP00000228289	ZNF268	2.39e-05	0.508	501	0.993156
ENSP00000228307	PXN	3.5e-05	0.404	999	0.970404
ENSP00000228318	SLC25A3	1.86e-05	0.9	735	0.485526
ENSP00000228347	POLR3B	1.37e-05	0.882	998	0.900124
ENSP00000228434	CD69	1.86e-05	0.408	610	0.932467
ENSP00000228437	PRDM4	2.31e-05	0.532	754	0.980356
ENSP00000228438	CLEC2B	2.62e-05	0.274	349	0.477758
ENSP00000228463	SELPLG	1.74e-05	0.476	439	0.685606
ENSP00000228468	ASIC1	2.47e-05	0.55	589	0.455888
ENSP00000228476	DAO	4.92e-05	0.084	928	0.461807
ENSP00000228495	KCTD10	5.44e-05	0.496	733	0.336747
ENSP00000228506	MLEC	0.000448667	0.388	242	0.195949
ENSP00000228510	MVK	3.68e-05	0.682	681	0.549532
ENSP00000228515	CSRNP2	9.09e-05	0.232	199	0.42426
ENSP00000228534	IL23A	3.11e-05	0.22	919	0.850957
ENSP00000228567	SYT10	1.54e-05	0.904	156	0.373705
ENSP00000228606	CYP27B1	2.1e-05	0.44	949	0.656716
ENSP00000228641	MYF6	2.12e-05	0.276	695	0.973922
ENSP00000228644	MYF5	1.86e-05	0.308	900	0.982821
ENSP00000228682	GLI1	1.72e-05	0.358	920	0.981172
ENSP00000228705	PPM1H	4.23e-05	0.938	206	0.518258
ENSP00000228740	LTA4H	7.54e-05	0.426	472	0.43546
ENSP00000228799	ITFG2	4.35e-05	0.77	241	0.4657
ENSP00000228811	PRR4	0.000267513	0.728	156	0.539626
ENSP00000228820	PARP11	2.16e-05	0.832	740	0.51571
ENSP00000228837	FGF6	0.000109357	0.288	912	0.968423
ENSP00000228841	MYL2	1.74e-05	0.326	966	0.821371
ENSP00000228843	RAD51AP1	4.11e-05	0.802	306	0.706526
ENSP00000228850	AKAP3	2.16e-05	0.888	592	0.241077
ENSP00000228862	DUSP16	2.36e-05	0.32	993	0.946027
ENSP00000228865	CREBL2	0.000302273	0.29	218	0.409146
ENSP00000228872	CDKN1B	3.14e-05	0.402	999	0.978924
ENSP00000228887	GPRC5D	2.03e-05	0.82	167	0.573525
ENSP00000228918	LTBR	3.35e-05	0.626	390	0.890089
ENSP00000228928	OAS3	1.23e-05	0.564	917	0.910526
ENSP00000228936	ART4	1.77e-05	0.89	181	0.435835
ENSP00000228938	MGP	1.54e-05	0.38	927	0.871247
ENSP00000228945	ARHGDIB	2.74e-05	0.6	916	0.6283
ENSP00000229002	RERGL	1.28e-05	0.818	559	0.996903
ENSP00000229030	FZD10	3.27e-05	0.196	958	0.863746
ENSP00000229134	IL26	2.12e-05	0.704	800	0.754226
ENSP00000229135	IFNG	1.89e-05	0.454	944	0
ENSP00000229179	NUP107	1.47e-05	0.932	920	0
ENSP00000229195	CNOT2	3.64e-05	0.31	999	0.54225
ENSP00000229214	KRR1	1.68e-05	0.868	737	0.951444
ENSP00000229238	MRPL51	3.57e-05	0.698	581	0.516047
ENSP00000229239	GAPDH	1.35e-05	0.7	977	0
ENSP00000229243	ACRBP	5.11e-05	0.206	413	0.305093
ENSP00000229251	COPS7A	6.95e-05	0.51	999	0.459865
ENSP00000229264	GNB3	1.33e-05	0.782	643	0.985457
ENSP00000229266	CHPT1	0.000128899	0.38	900	0.338961
ENSP00000229268	USP5	3.31e-05	0.704	692	0.661056
ENSP00000229270	TPI1	1.86e-05	0.756	500	0.783734
ENSP00000229277	ENO2	1.6e-05	0.626	791	0.840286
ENSP00000229281	C12orf57	3.49e-05	0.7	361	0.475509
ENSP00000229304	APOBEC1	2.25e-05	0.494	818	0.352016
ENSP00000229307	NANOG	4.66e-05	0.35	999	0.990196
ENSP00000229314	GOLT1B	0.000299441	0.412	629	0.30063
ENSP00000229319	LDHB	1.78e-05	0.742	949	0.749776
ENSP00000229328	PRKAB1	4.12e-05	0.408	901	0
ENSP00000229329	CMAS	2.29e-05	0.682	482	0.435448
ENSP00000229330	HCFC2	2.31e-05	0.456	784	0.749334
ENSP00000229335	AICDA	2.28e-05	0.418	621	0.812746
ENSP00000229340	RAB35	0.000173439	0.166	561	0.42154
ENSP00000229379	COX6A1	2.43e-05	0.74	992	0.665609
ENSP00000229395	FGFR1OP2	0.000328642	0.38	902	0.232424
ENSP00000229402	KLRB1	2.59e-05	0.284	356	0.788574
ENSP00000229416	GCLC	0.000109925	0.428	889	0.553778
ENSP00000229447	IYD	1.58e-05	0.89	388	0.262223
ENSP00000229554	RSPH4A	2.01e-05	0.656	553	0.407911
ENSP00000229563	TMEM14C	5.75e-05	0.442	284	0.519268
ENSP00000229583	ADTRP	2.81e-05	0.538	359	0.221586
ENSP00000229595	ASF1A	4.71e-05	0.414	878	0.965033
ENSP00000229633	HINT3	0.000290599	0.724	254	0.686631
ENSP00000229708	ULBP1	8.29e-05	0.702	497	0.387072
ENSP00000229729	SLC44A4	2.91e-05	0.484	358	0.404235
ENSP00000229758	FBXO5	5.1e-05	0.636	999	0.806414
ENSP00000229769	FANCE	0.000344656	0.388	999	0.918615
ENSP00000229771	TULP1	1.77e-05	0.824	416	0.507348
ENSP00000229794	MAPK14	2.12e-05	0.404	999	0
ENSP00000229812	STK38	1.48e-05	0.73	843	0.990311
ENSP00000229824	RAB44	2.76e-05	0.524	712	0.605594
ENSP00000229854	MCM3	1.96e-05	0.66	758	0.855225
ENSP00000229903	SAYSD1	0.0126663	0.286	0	0.933724
ENSP00000229955	GPR63	2.24e-05	0.754	524	0.575432
ENSP00000229971	FBXL4	1.46e-05	0.944	972	0
ENSP00000230012	HDGFL1	7.46e-05	0.354	330	0
ENSP00000230036	GPLD1	2.02e-05	0.684	900	0.194352
ENSP00000230048	ACOT13	3.76e-05	0.78	949	0.308019
ENSP00000230050	RPS12	1.78e-05	0.936	998	0.94773
ENSP00000230053	B3GAT2	2.34e-05	0.67	404	0.605635
ENSP00000230056	GMNN	4.25e-05	0.812	675	0.744732
ENSP00000230085	SNX3	0.000201378	0.32	902	0.664125
ENSP00000230099	TRIM38	0.000898445	0.39	567	0
ENSP00000230122	ZBTB24	2.25e-05	0.516	501	0.985143
ENSP00000230124	FIG4	2.55e-05	0.572	921	0.500465
ENSP00000230256	UNC93A	3.83e-05	0.424	358	0.347191
ENSP00000230301	C6orf118	3.43e-05	0.492	379	0.506012
ENSP00000230321	MDFI	1.82e-05	0.954	639	0.287484
ENSP00000230323	TFEB	1.37e-05	0.88	490	0
ENSP00000230340	BYSL	1.65e-05	0.93	950	0.945548
ENSP00000230354	TBP	2.02e-05	0.49	999	0
ENSP00000230361	GUCA1B	2.9e-05	0.308	738	0.592726
ENSP00000230381	PRPH2	3.08e-05	0.448	835	0.514491
ENSP00000230419	PTK7	1.49e-05	0.814	810	0.994887
ENSP00000230431	DNPH1	3.29e-05	0.562	360	0.623295
ENSP00000230449	EXOC2	3.26e-05	0.48	999	0.650271
ENSP00000230461	TMEM30A	0.000156873	0.422	317	0.285386
ENSP00000230538	LAMA4	3.13e-05	0.73	264	0.540082
ENSP00000230565	ENPP5	4.65e-05	0.628	423	0.534131
ENSP00000230568	LY86	2.96e-05	0.624	472	0.3418
ENSP00000230582	PRSS16	2.1e-05	0.668	759	0.303119
ENSP00000230588	MEP1A	2.31e-05	0.808	681	0.343114
ENSP00000230640	SKIV2L2	2.14e-05	0.724	733	0.953252
ENSP00000230671	SLC6A7	0.000149802	0.282	649	0.507673
ENSP00000230732	POU4F3	3.97e-05	0.146	475	0.925797
ENSP00000230771	HARS2	1.97e-05	0.768	744	0.943541
ENSP00000230792	NUDT12	3.65e-05	0.572	900	0.25549
ENSP00000230859	PAPD7	4.6e-05	0.332	632	0.924027
ENSP00000230895	DAP	6.09e-05	0.384	876	0.791526
ENSP00000231004	LOX	3.01e-05	0.398	813	0.86541
ENSP00000231009	GZMK	2.17e-05	0.598	389	0.306022
ENSP00000231021	CDH9	0.00018324	0.378	902	0.373422
ENSP00000231061	SPARC	4.58e-05	0.274	972	0.940245
ENSP00000231121	HAND1	2.41e-05	0.33	730	0.968917
ENSP00000231130	PCDHB3	0.00028852	0.464	206	0.510193
ENSP00000231134	PCDHB5	9.18e-05	0.89	198	0.37956
ENSP00000231136	PCDHB6	1.69e-05	0.864	0	0.509331
ENSP00000231137	PCDHB7	8.44e-05	0.716	211	0.40384
ENSP00000231173	PCDHB15	0.000202713	0.798	213	0.518612
ENSP00000231188	GRM6	1.93e-05	0.47	906	0.801783
ENSP00000231198	THG1L	8.02e-05	0.842	380	0.308138
ENSP00000231228	IL12B	3.4e-05	0.208	999	0.930353
ENSP00000231238	TTC1	3.55e-05	0.87	463	0.288644
ENSP00000231357	IRX4	3.38e-05	0.46	695	0.958429
ENSP00000231368	LNPEP	2.01e-05	0.746	472	0.469768
ENSP00000231420	AGXT2	1.99e-05	0.758	953	0.52729
ENSP00000231449	IL4	3.71e-05	0.352	993	0.977811
ENSP00000231454	IL5	2.69e-05	0.264	991	0.93146
ENSP00000231461	ST8SIA4	2.98e-05	0.256	914	0.714626
ENSP00000231484	PCDH12	5.09e-05	0.56	194	0.422558
ENSP00000231498	NUP155	3.47e-05	0.808	979	0.724053
ENSP00000231509	NR3C1	4.38e-05	0.396	997	0.963395
ENSP00000231524	TRIM23	1.85e-05	0.824	583	0.455587
ENSP00000231572	RARS	2.14e-05	0.484	999	0.831878
ENSP00000231656	CDX1	2.1e-05	0.238	969	0.98551
ENSP00000231668	BNIP1	6.84e-05	0.58	813	0.496982
ENSP00000231706	SLC7A14	2.84e-05	0.646	628	0.506354
ENSP00000231721	SEMA3G	5.11e-05	0.146	897	0.627971
ENSP00000231749	ZMYND10	2.03e-05	0.866	239	0.273828
ENSP00000231751	LTF	2.72e-05	0.61	907	0.590552
ENSP00000231790	MLH1	2.21e-05	0.5	999	0.883659
ENSP00000231887	EHHADH	1.45e-05	0.766	913	0.623507
ENSP00000231948	CRBN	4.35e-05	0.924	311	0.198656
ENSP00000232003	HRG	2.24e-05	0.656	923	0.649729
ENSP00000232014	BCL6	1.82e-05	0.374	997	0.969988
ENSP00000232217	RBP2	3.82e-05	0.314	806	0.563578
ENSP00000232219	RBP1	4.46e-05	0.518	900	0.741624
ENSP00000232375	PFKFB4	3.37e-05	0.49	290	0.412994
ENSP00000232424	HES1	0.000134025	0.348	968	0.952477
ENSP00000232458	ECT2	2.71e-05	0.674	909	0.676801
ENSP00000232461	GNAT1	1.68e-05	0.654	937	0.986787
ENSP00000232496	TUSC2	9.09e-05	0.286	563	0.281193
ENSP00000232501	NPRL2	4.05e-05	0.786	395	0.238721
ENSP00000232519	C3orf14	2.82e-05	0.658	341	0.535687
ENSP00000232564	GNB4	1.57e-05	0.626	840	0.988463
ENSP00000232603	MORC1	3.75e-05	0.908	360	0.27272
ENSP00000232607	UMPS	1.04e-05	0.816	895	0
ENSP00000232744	ABTB1	2.16e-05	0.464	259	0.921029
ENSP00000232766	KLHL18	1.9e-05	0.896	310	0.836424
ENSP00000232854	HEMK1	5.28e-05	0.056	602	0.66274
ENSP00000232888	RRP9	1.74e-05	0.904	967	0.937672
ENSP00000232892	AADAC	2.31e-05	0.64	483	0.257968
ENSP00000232905	EIF1B	8.71e-05	0.406	983	0.752644
ENSP00000232974	ZBTB47	2.82e-05	0.438	576	0.986931
ENSP00000232975	TNNC1	1.25e-05	0.926	627	0.992483
ENSP00000232978	NKTR	5.91e-05	0.414	934	0.74015
ENSP00000233025	SPCS1	2.34e-05	0.928	967	0.713607
ENSP00000233027	NEK4	3.27e-05	0.556	357	0.376356
ENSP00000233047	TMEM159	0.00393293	0.382	489	0.673473
ENSP00000233055	WDFY1	0.000139465	0.28	726	0.412009
ENSP00000233057	EIF2AK2	8.49e-05	0.396	999	0.791403
ENSP00000233078	DAZAP1	0.00016712	0.37	616	0.849483
ENSP00000233084	DDX1	4.96e-05	0.452	859	0.958687
ENSP00000233099	HEATR5B	0.00019324	0.392	377	0.307623
ENSP00000233121	MAPRE3	2.37e-05	0.65	806	0.694238
ENSP00000233143	TMSB10	6.69e-05	0.428	800	0.230009
ENSP00000233146	MSH2	1.75e-05	0.606	999	0.89375
ENSP00000233154	NCK2	4.51e-05	0.254	992	0.822572
ENSP00000233156	TFPI	6.39e-05	0.28	902	0.726649
ENSP00000233202	SLC11A1	4.83e-05	0.482	506	0.586596
ENSP00000233242	APOB	1.78e-05	0.632	997	0.816277
ENSP00000233331	INO80B	3.69e-05	0.43	900	0.432403
ENSP00000233336	TTL	6.48e-05	0.302	338	0.524256
ENSP00000233379	FAHD2A	4.87e-05	0.926	417	0.289298
ENSP00000233468	SF3B14	4.49e-05	0.58	999	0
ENSP00000233535	SLC30A3	3.18e-05	0.612	722	0.678937
ENSP00000233545	MPV17	1.7e-05	0.902	725	0.325647
ENSP00000233557	NRBP1	8.01e-05	0.564	908	0.774357
ENSP00000233575	SNX17	0.000351758	0.144	847	0.351537
ENSP00000233596	REEP6	3.66e-05	0.65	461	0.285976
ENSP00000233607	APC2	3.87e-05	0.59	869	0.87036
ENSP00000233615	WBP1	6.92e-05	0.338	518	0.546183
ENSP00000233616	MOGS	3.58e-05	0.662	644	0.468634
ENSP00000233623	TTC31	2.45e-05	0.784	951	0.358955
ENSP00000233627	NDUFS7	2.34e-05	0.888	943	0.708241
ENSP00000233630	PCGF1	4.32e-05	0.712	945	0.86399
ENSP00000233638	TLX2	0.000251606	0.29	915	0.772141
ENSP00000233668	DOK1	9.09e-05	0.36	999	0.681329
ENSP00000233710	ACADL	3.69e-05	0.624	497	0.618372
ENSP00000233712	EVA1A	0.000199702	0.866	0	0.733747
ENSP00000233714	LANCL1	0.000180461	0.164	690	0.3304
ENSP00000233735	REG1A	2.69e-05	0.678	215	0.286274
ENSP00000233809	IGFBP2	2.33e-05	0.36	735	0.919278
ENSP00000233813	IGFBP5	2.56e-05	0.466	891	0.900643
ENSP00000233826	KCNJ13	3.37e-05	0.25	500	0.60026
ENSP00000233838	GGCX	4.82e-05	0.932	198	0.236008
ENSP00000233840	NEU2	1.54e-05	0.742	212	0.489504
ENSP00000233893	HSPE1	1.49e-05	0.878	999	0.855466
ENSP00000233944	PRKAG3	2.48e-05	0.426	918	0.966883
ENSP00000233946	IL1R1	3.5e-05	0.594	963	0
ENSP00000233948	WNT6	3.11e-05	0.15	921	0.972279
ENSP00000233954	IL1RL1	2.66e-05	0.312	296	0.714197
ENSP00000233957	IL18R1	3.12e-05	0.326	919	0.741284
ENSP00000233969	SLC9A2	2.52e-05	0.808	566	0.574659
ENSP00000233997	AZU1	2.19e-05	0.446	404	0.692787
ENSP00000234038	PPP1R7	2.19e-05	0.694	538	0.805272
ENSP00000234040	PASK	2.89e-05	0.434	832	0.996869
ENSP00000234071	PROC	3.22e-05	0.346	538	0.921327
ENSP00000234142	GREB1	3.64e-05	0.288	824	0.26882
ENSP00000234160	GORASP2	2.63e-05	0.588	628	0.495701
ENSP00000234179	PRKD3	3.79e-05	0.618	884	0.499793
ENSP00000234195	RMDN2	0.000187363	0.536	590	0.327532
ENSP00000234198	DLX2	2.51e-05	0.528	841	0.98588
ENSP00000234256	SLC1A4	2.24e-05	0.868	726	0.500731
ENSP00000234296	ORC2	1.54e-05	0.916	952	0
ENSP00000234301	COX7A2L	0.000763914	0.39	916	0.653423
ENSP00000234310	PPP3R1	2.69e-05	0.446	923	0.986018
ENSP00000234313	PLEK	3.18e-05	0.382	941	0.916758
ENSP00000234347	PRTN3	1.42e-05	0.802	747	0.792469
ENSP00000234371	KISS1R	2.02e-05	0.646	974	0.89973
ENSP00000234389	GRIN3B	3.18e-05	0.168	788	0.562468
ENSP00000234392	VAX2	2.87e-05	0.5	344	0.879611
ENSP00000234396	ATP6V1B1	2.11e-05	0.676	776	0.344404
ENSP00000234420	MSH6	1.75e-05	0.618	901	0.886128
ENSP00000234454	SPR	7.5e-05	0.908	194	0.186602
ENSP00000234488	CLCN6	2.7e-05	0.922	447	0.639046
ENSP00000234590	ENO1	1.35e-05	0.676	739	0.857778
ENSP00000234626	CDC7	2.64e-05	0.644	773	0.819344
ENSP00000234677	SARS	4.09e-05	0.414	818	0.841476
ENSP00000234701	CLCA1	2.29e-05	0.714	752	0.433487
ENSP00000234739	BCL9	4.19e-05	0.2	560	0.688658
ENSP00000234798	TPSG1	1.91e-05	0.762	506	0.311163
ENSP00000234800	SLC35E2B	3.89e-05	0.37	656	0
ENSP00000234816	ANGPTL1	3.35e-05	0.528	217	0.225825
ENSP00000234827	TCEANC2	1.49e-05	0.782	608	0.902125
ENSP00000234831	TMEM59	0.00054614	0.388	186	0.437734
ENSP00000234961	OPRD1	1.91e-05	0.944	913	0.798132
ENSP00000235090	WDR77	3.62e-05	0.526	759	0.77044
ENSP00000235180	DLGAP3	5.27e-05	0.268	736	0.451694
ENSP00000235307	C1orf21	4.49e-05	0.712	0	0.825063
ENSP00000235310	MAD2L2	3.95e-05	0.722	999	0.703228
ENSP00000235329	MFN2	1.71e-05	0.688	579	0.532785
ENSP00000235332	MIIP	7.62e-05	0.88	0	0.454531
ENSP00000235345	SLC35D1	4.1e-05	0.742	650	0.396475
ENSP00000235347	PRAMEF10	0.00317518	0.762	0	0.879822
ENSP00000235349	PRAMEF4	2.36e-05	0.898	0	0.818453
ENSP00000235372	PRDM2	4.35e-05	0.504	653	0.940126
ENSP00000235521	WARS2	2.56e-05	0.726	484	0.733999
ENSP00000235532	OSCP1	7.76e-05	0.172	621	0.358049
ENSP00000235628	NT5C1A	2.01e-05	0.418	900	0.449548
ENSP00000235835	AKR7A2	6.35e-05	0.732	903	0.383661
ENSP00000235932	RAB7L1	6.94e-05	0.554	659	0
ENSP00000235933	CD160	5.03e-05	0.65	150	0.708099
ENSP00000236137	SLC19A2	0.000238406	0.386	379	0.305747
ENSP00000236147	SELL	1.79e-05	0.856	895	0.909913
ENSP00000236166	FMO6P	2.69e-05	0.746	299	0
ENSP00000236192	VAMP4	6.33e-05	0.202	998	0.737342
ENSP00000236273	SYF2	4.85e-05	0.304	667	0.555537
ENSP00000236495	SLC5A9	2.3e-05	0.742	228	0.398555
ENSP00000236671	CTSD	3.1e-05	0.268	812	0.861943
ENSP00000236709	A4GNT	3.23e-05	0.472	337	0.730518
ENSP00000236826	MMP8	2.88e-05	0.436	842	0.935052
ENSP00000236850	APOA1	1.91e-05	0.396	944	0.823449
ENSP00000236877	SLC8A2	2.58e-05	0.66	388	0.443001
ENSP00000236957	EEF1B2	2.27e-05	0.722	692	0.882217
ENSP00000236959	ATIC	4.56e-05	0.44	990	0.767024
ENSP00000236979	TNP1	1.99e-05	0.84	581	0.358722
ENSP00000236980	FASTKD2	6.36e-05	0.8	469	0.364786
ENSP00000237014	TTR	2.75e-05	0.482	906	0.92421
ENSP00000237172	FILIP1	8.23e-05	0.728	199	0.379593
ENSP00000237201	SPACA1	1.87e-05	0.858	213	0.558231
ENSP00000237264	TBPL1	2.62e-05	0.448	996	0
ENSP00000237275	ZC2HC1B	0.000246971	0.104	461	0.586559
ENSP00000237281	FBXO30	0.00282176	0.388	796	0.574945
ENSP00000237283	ADAT2	3.67e-05	0.702	598	0.579275
ENSP00000237289	TNFAIP3	6.97e-05	0.432	991	0.906269
ENSP00000237316	TCF21	2.82e-05	0.32	687	0.914698
ENSP00000237353	PMFBP1	7.86e-05	0.24	401	0.537346
ENSP00000237380	MED28	0.000157711	0.378	999	0.836711
ENSP00000237449	DNAH6	2.34e-05	0.846	859	0.55563
ENSP00000237455	RNF103	2.72e-05	0.884	741	0.728103
ENSP00000237500	MYL12B	2.3e-05	0.46	978	0.829059
ENSP00000237527	GHRH	1.52e-05	0.832	956	0.771891
ENSP00000237530	RPN2	3.16e-05	0.708	976	0.714272
ENSP00000237536	SOGA1	0.000118252	0.534	538	0.271873
ENSP00000237612	ABCG2	2.02e-05	0.598	632	0.841233
ENSP00000237642	FAM47E-STBD1	3.25e-05	0.724	190	0
ENSP00000237654	CCNI	4.13e-05	0.392	592	0.840592
ENSP00000237696	RARRES1	7e-05	0.208	319	0.532557
ENSP00000237822	C2orf43	6.59e-05	0.862	638	0
ENSP00000237837	FGF23	2.28e-05	0.3	980	0.932069
ENSP00000237853	ELL2	5.76e-05	0.474	968	0.812065
ENSP00000237858	GLRX	2.31e-05	0.84	509	0.467735
ENSP00000237889	NDUFB3	3.47e-05	0.878	943	0.708482
ENSP00000237937	ZFAND5	4.33e-05	0.798	176	0.27672
ENSP00000238018	GDA	5.32e-05	0.63	931	0.356977
ENSP00000238044	C2orf40	2.08e-05	0.762	288	0.41273
ENSP00000238081	YWHAQ	2.67e-05	0.39	972	0.989076
ENSP00000238112	CPSF3	3.04e-05	0.466	963	0.895552
ENSP00000238146	DDX55	1.93e-05	0.946	965	0.912426
ENSP00000238156	CCDC92	0.0012706	0.344	653	0.528452
ENSP00000238256	FKBP15	5.87e-05	0.728	349	0.455706
ENSP00000238341	CNTRL	6.1e-05	0.74	916	0.66997
ENSP00000238379	HDHD3	4.72e-05	0.866	195	0.343161
ENSP00000238497	VPS4B	8.69e-05	0.526	997	0.670563
ENSP00000238508	SERPINB10	1.47e-05	0.906	271	0.31208
ENSP00000238558	GSC	2.58e-05	0.62	902	0.955468
ENSP00000238561	ADCK1	3.15e-05	0.486	374	0.258093
ENSP00000238609	IFI27L2	5.26e-05	0.612	301	0.565786
ENSP00000238616	NEK9	2.66e-05	0.762	697	0.517225
ENSP00000238618	ACYP1	9.2e-05	0.67	224	0.318986
ENSP00000238628	IFT43	0.000103167	0.406	586	0.88247
ENSP00000238647	IRF2BPL	0.000589271	0.386	378	0.494726
ENSP00000238651	ACOT2	3.94e-05	0.73	517	0.741104
ENSP00000238667	FLVCR2	2.19e-05	0.786	462	0.278983
ENSP00000238682	TGFB3	6.53e-05	0.266	940	0.97778
ENSP00000238714	PAPOLG	3.52e-05	0.522	816	0.812602
ENSP00000238721	TP53I3	2.74e-05	0.848	644	0.63464
ENSP00000238738	RHOQ	2e-05	0.4	959	0.984608
ENSP00000238788	TMEM214	0.000169408	0.152	815	0.275141
ENSP00000238789	ATAD2B	1.72e-05	0.582	951	0.743074
ENSP00000238823	FAM98A	8.33e-05	0.772	303	0.399832
ENSP00000238831	YIPF4	7.74e-05	0.772	435	0.53333
ENSP00000238855	AFTPH	0.000112277	0.59	900	0.659634
ENSP00000238875	LGALSL	0.000406627	0.376	570	0.438206
ENSP00000238892	CRIPT	0.000197808	0.378	851	0.343994
ENSP00000238936	TMEM180	0.00111096	0.39	204	0.562233
ENSP00000238994	PPP1R3C	0.000124262	0.396	994	0.399779
ENSP00000239027	HELLS	2.19e-05	0.494	756	0.981312
ENSP00000239032	PRLHR	1.83e-05	0.82	196	0.527148
ENSP00000239125	C10orf95	3.56e-05	0.69	159	0
ENSP00000239144	HOXB8	2.27e-05	0.466	902	0.981205
ENSP00000239151	HOXB5	3.6e-05	0.494	435	0.984342
ENSP00000239165	HOXB7	2.59e-05	0.264	863	0.987543
ENSP00000239223	DUSP1	3.91e-05	0.434	988	0.954956
ENSP00000239231	PANK3	0.000496643	0.388	900	0.270573
ENSP00000239243	MSX2	2.79e-05	0.342	855	0.991318
ENSP00000239316	INSL4	3.57e-05	0.554	514	0.529032
ENSP00000239347	IFNA7	3.69e-05	0.576	800	0.626588
ENSP00000239367	LRP11	0.000278097	0.55	507	0.440345
ENSP00000239374	CCDC170	1.48e-05	0.806	301	0.23912
ENSP00000239440	ARAP3	3.09e-05	0.662	727	0.598102
ENSP00000239444	PCDHB8	1.8e-05	0.78	0	0.528178
ENSP00000239446	PCDHB10	0.000105482	0.918	0	0.435334
ENSP00000239449	PCDHB14	0.00016465	0.812	240	0.412289
ENSP00000239450	PCDHB12	4.35e-05	0.492	205	0.42212
ENSP00000239451	SLC25A2	3.7e-05	0.51	624	0.283202
ENSP00000239461	PRRX1	2.65e-05	0.332	801	0.968742
ENSP00000239462	TNN	1.8e-05	0.608	865	0.46459
ENSP00000239587	TTLL2	2.59e-05	0.602	417	0.70179
ENSP00000239690	NUDCD1	8.05e-05	0.532	626	0.318034
ENSP00000239730	-	4.69e-05	0.692	632	0
ENSP00000239761	MRC1	2.56e-05	0.45	668	0
ENSP00000239830	CCDC77	0.000104689	0.772	218	0.61986
ENSP00000239878	UFM1	0.000300822	0.41	343	0.389749
ENSP00000239882	ELF1	8.19e-05	0.418	659	0.932165
ENSP00000239891	ALG5	2.29e-05	0.844	426	0.381056
ENSP00000239906	FAM53C	2.12e-05	0.784	0	0.688379
ENSP00000239926	MYOT	4.18e-05	0.858	499	0.386408
ENSP00000239940	PFN2	2.29e-05	0.448	894	0.751489
ENSP00000239944	SERP1	3.02e-05	0.824	901	0.422423
ENSP00000240050	MTERFD3	4.55e-05	0.752	351	0
ENSP00000240055	NFYB	1.42e-05	0.808	901	0
ENSP00000240079	CCDC53	0.000269844	0.058	535	0.347257
ENSP00000240093	FZD3	2.87e-05	0.338	977	0.900105
ENSP00000240100	DUSP4	2.36e-05	0.46	932	0.914662
ENSP00000240123	SORBS3	2.46e-05	0.682	437	0.473199
ENSP00000240139	PPP3CC	1.34e-05	0.704	817	0.989875
ENSP00000240185	TARDBP	6.76e-05	0.366	948	0.870604
ENSP00000240189	PRAMEF2	0.00990697	0.756	0	0.8483
ENSP00000240285	RDH10	0.000122226	0.404	959	0.456228
ENSP00000240306	DLX4	1.85e-05	0.826	687	0.956218
ENSP00000240316	COIL	8.03e-05	0.434	749	0.841687
ENSP00000240327	SPOP	3.18e-05	0.646	918	0.832947
ENSP00000240328	TBX2	2.3e-05	0.306	931	0.980445
ENSP00000240333	SLC35B1	4.93e-05	0.298	189	0.392416
ENSP00000240335	TBX4	2.73e-05	0.212	517	0.978996
ENSP00000240361	TEX14	2.26e-05	0.534	950	0.448877
ENSP00000240364	FAM117A	5.69e-05	0.3	203	0.616657
ENSP00000240423	NCAPH	2.38e-05	0.798	533	0.776017
ENSP00000240488	MND1	3.56e-05	0.6	963	0.477412
ENSP00000240499	ZNF141	2.39e-05	0.616	501	0.968619
ENSP00000240617	PLBD1	0.000101311	0.932	0	0.484179
ENSP00000240619	TAS2R10	1.17e-05	0.926	0	0.466021
ENSP00000240651	PYROXD1	0.000108578	0.934	207	0.402788
ENSP00000240652	IAPP	2.18e-05	0.646	936	0.723706
ENSP00000240662	KCNJ8	2.36e-05	0.594	383	0.685947
ENSP00000240687	TAS2R7	3.26e-05	0.954	0	0.871315
ENSP00000240691	TAS2R9	1.93e-05	0.948	0	0.609702
ENSP00000240731	ZNF211	2.73e-05	0.462	501	0.994189
ENSP00000240851	TFG	4.5e-05	0.544	606	0.758087
ENSP00000240874	KALRN	1.82e-05	0.47	909	0.762027
ENSP00000240922	NAA50	2.56e-05	0.448	506	0.499014
ENSP00000240986	GJA8	4.96e-05	0.27	526	0
ENSP00000241014	MAPK8IP1	2.71e-05	0.424	898	0.860395
ENSP00000241041	PEX16	3.25e-05	0.672	500	0.772764
ENSP00000241051	DEPDC7	5.1e-05	0.948	158	0.522134
ENSP00000241052	CAT	1.59e-05	0.642	961	0.915568
ENSP00000241124	GJB6	1.63e-05	0.7	863	0.549585
ENSP00000241125	GJA3	4.13e-05	0.86	940	0.240827
ENSP00000241256	GHSR	1.82e-05	0.814	906	0.838117
ENSP00000241261	TNFSF10	1.85e-05	0.624	967	0.957582
ENSP00000241305	CPXM2	1.24e-05	0.932	206	0.318987
ENSP00000241312	CSMD2	3.05e-05	0.428	422	0.303048
ENSP00000241337	GSTM2	4.62e-05	0.812	921	0.426818
ENSP00000241416	ACVR2A	4.58e-05	0.424	981	0.935496
ENSP00000241436	POLK	2.46e-05	0.688	962	0.881884
ENSP00000241453	FLT3	1.71e-05	0.368	846	0.984451
ENSP00000241463	RASL11A	2.3e-05	0.42	559	0.996824
ENSP00000241502	FYTTD1	0.000108973	0.534	597	0.597075
ENSP00000241527	MTERFD2	0.000118587	0.57	358	0
ENSP00000241600	MRPS2	1.91e-05	0.734	893	0.854874
ENSP00000241651	MYOG	4.49e-05	0.258	866	0.980628
ENSP00000241808	PRM2	1.25e-05	0.914	581	0.350106
ENSP00000242057	AHR	6.16e-05	0.408	834	0.938861
ENSP00000242067	BBS9	4.37e-05	0.312	887	0.741378
ENSP00000242104	OCM	1.37e-05	0.876	593	0
ENSP00000242108	EEPD1	6.28e-05	0.622	361	0.308683
ENSP00000242109	KIAA0087	1.56e-05	0.902	0	0
ENSP00000242152	NPY	1.53e-05	0.636	906	0.829635
ENSP00000242159	HOXA7	3.08e-05	0.53	916	0.983768
ENSP00000242208	INHBA	2.86e-05	0.226	630	0.971033
ENSP00000242209	FKBP9	4.3e-05	0.44	547	0.45576
ENSP00000242210	NT5C3A	5.09e-05	0.72	900	0.420739
ENSP00000242248	POLM	1.72e-05	0.784	908	0.65899
ENSP00000242249	RAMP3	7.69e-05	0.144	822	0.312716
ENSP00000242257	FTSJ2	1.82e-05	0.914	666	0.87539
ENSP00000242261	TWIST1	4.37e-05	0.34	948	0.982243
ENSP00000242275	SLC25A51	3.23e-05	0.572	303	0.464202
ENSP00000242315	KIAA1045	1.48e-05	0.864	0	0
ENSP00000242317	DNAI1	2.23e-05	0.376	699	0.384513
ENSP00000242338	CNTFR	2.27e-05	0.536	866	0.835601
ENSP00000242351	ZC3HAV1	0.000328485	0.398	644	0.468739
ENSP00000242375	AKR1D1	2.68e-05	0.728	482	0.409041
ENSP00000242462	NEUROG3	2.69e-05	0.294	993	0.963339
ENSP00000242480	EGR2	2.12e-05	0.376	925	0.975478
ENSP00000242505	FAM149B1	9.67e-05	0.37	390	0.53113
ENSP00000242576	UNG	2.21e-05	0.546	594	0.767748
ENSP00000242577	DYNLL1	2.39e-05	0.62	964	0.638655
ENSP00000242591	IFT81	8.04e-05	0.774	447	0.584674
ENSP00000242592	ACADS	2.27e-05	0.472	491	0.608327
ENSP00000242607	HVCN1	6.36e-05	0.538	636	0.248889
ENSP00000242719	RNF11	2.63e-05	0.732	893	0.710991
ENSP00000242728	BHLHE41	3.47e-05	0.39	320	0.933252
ENSP00000242729	SSPN	3.12e-05	0.534	924	0.276919
ENSP00000242776	DDX39A	1.92e-05	0.456	715	0.969922
ENSP00000242784	C19orf43	0.000283779	0.646	360	0.697232
ENSP00000242786	CD97	2.68e-05	0.926	700	0
ENSP00000242796	WDR83	0.000189691	0.374	595	0
ENSP00000242804	ZNF442	2.82e-05	0.458	501	0.995213
ENSP00000242810	KLHL24	0.000382908	0.39	159	0.396354
ENSP00000242819	CCDC70	3.45e-05	0.65	191	0.776058
ENSP00000242827	EBPL	1.81e-05	0.952	301	0.401008
ENSP00000242839	ATP7B	5.73e-05	0.46	730	0.544588
ENSP00000242872	CENPK	4.26e-05	0.738	903	0.665413
ENSP00000242994	NEUROD4	4.34e-05	0.246	535	0.937192
ENSP00000243045	ORMDL2	0.00010729	0.464	364	0.383308
ENSP00000243052	PDE1B	2.27e-05	0.87	900	0.360661
ENSP00000243056	HOXC13	2.99e-05	0.65	645	0.931906
ENSP00000243077	LRP1	2.9e-05	0.496	993	0.855569
ENSP00000243103	HOXC12	2.87e-05	0.312	645	0.875117
ENSP00000243108	HOXC6	3.77e-05	0.666	510	0.981603
ENSP00000243167	FAAH	1.27e-05	0.916	448	0.363838
ENSP00000243189	C1orf63	4.61e-05	0.576	213	0
ENSP00000243213	IL13RA2	4.19e-05	0.384	0	0.495988
ENSP00000243222	COL10A1	2.75e-05	0.598	905	0.674181
ENSP00000243253	SEC61A1	1.56e-05	0.83	999	0.629598
ENSP00000243286	TCEAL3	3.52e-05	0.766	167	0.571611
ENSP00000243298	RAB9B	5.15e-05	0.166	556	0.61143
ENSP00000243314	MAGEA9B	5.36e-05	0.606	597	0
ENSP00000243344	TTC21B	8.05e-05	0.442	545	0.700144
ENSP00000243346	NMI	7.2e-05	0.774	900	0.542389
ENSP00000243347	TNFAIP6	2.88e-05	0.416	751	0.810557
ENSP00000243349	ACVR1C	3.47e-05	0.242	900	0.935066
ENSP00000243389	SLC36A1	3.04e-05	0.756	519	0.513097
ENSP00000243440	BATF3	2.16e-05	0.302	996	0
ENSP00000243457	KCNJ2	2.01e-05	0.496	963	0.695395
ENSP00000243501	PLA2G12A	2.59e-05	0.724	900	0.275254
ENSP00000243563	SNRPA	4.19e-05	0.382	985	0.942634
ENSP00000243578	B9D2	3.78e-05	0.356	900	0.577905
ENSP00000243611	C4BPB	4.74e-05	0.86	298	0.503649
ENSP00000243643	ZNF415	2.81e-05	0.43	501	0.99249
ENSP00000243644	ZNF350	2.9e-05	0.414	895	0.973904
ENSP00000243662	RAB38	4.88e-05	0.412	751	0.45298
ENSP00000243673	GPR83	2.71e-05	0.292	871	0.382726
ENSP00000243706	HAUS3	4.57e-05	0.944	495	0.23491
ENSP00000243776	CHPF	3.77e-05	0.744	950	0.656475
ENSP00000243786	INHA	2.65e-05	0.266	394	0.947665
ENSP00000243878	ENKD1	1.05e-05	0.942	502	0.304615
ENSP00000243896	SLC35C2	5.32e-05	0.762	672	0.633708
ENSP00000243903	ACTR5	5.59e-05	0.53	900	0.427955
ENSP00000243911	MC3R	1.83e-05	0.78	904	0.607571
ENSP00000243913	GCNT7	2.94e-05	0.47	375	0.657323
ENSP00000243914	CTCFL	2.12e-05	0.584	758	0.975462
ENSP00000243918	SYS1	7.11e-05	0.552	665	0.403418
ENSP00000243924	PI3	1.62e-05	0.32	570	0.929664
ENSP00000243938	WFDC3	4.4e-05	0.332	156	0.645463
ENSP00000243997	ATP5E	2.45e-05	0.952	686	0.701646
ENSP00000244007	PLCG1	2.83e-05	0.39	985	0.898425
ENSP00000244020	SRSF6	4.3e-05	0.372	967	0.966364
ENSP00000244040	RAB22A	0.000109363	0.316	669	0.61316
ENSP00000244043	PTGIS	2.55e-05	0.908	873	0.596488
ENSP00000244050	SNAI1	3.64e-05	0.364	967	0.988461
ENSP00000244051	MOCS3	1.76e-05	0.826	629	0.570003
ENSP00000244061	RNF114	4.55e-05	0.91	211	0.331445
ENSP00000244096	MAGEA10	7.91e-05	0.6	597	0.307423
ENSP00000244137	PEPD	1.59e-05	0.766	622	0.722839
ENSP00000244174	IL9R	3.27e-05	0.284	820	0.819636
ENSP00000244217	MCEE	3.37e-05	0.878	572	0.386201
ENSP00000244221	PAIP2B	4.39e-05	0.67	800	0.384661
ENSP00000244227	SNRNP27	0.00010263	0.638	733	0.317487
ENSP00000244230	MPHOSPH10	2.1e-05	0.914	852	0.920356
ENSP00000244241	IL17C	1.82e-05	0.876	267	0.46673
ENSP00000244289	LIPE	2.17e-05	0.916	969	0.409572
ENSP00000244296	PSG1	2.11e-05	0.618	226	0.573623
ENSP00000244314	IRGC	5.32e-05	0.234	311	0.32163
ENSP00000244333	LYPD3	1.98e-05	0.766	214	0.529339
ENSP00000244336	CEACAM8	3.62e-05	0.216	416	0.556009
ENSP00000244360	RNF39	4.06e-05	0.884	394	0.609322
ENSP00000244364	DST	2.1e-05	0.822	391	0.593282
ENSP00000244458	PACSIN1	3.04e-05	0.454	718	0.364755
ENSP00000244496	RRP36	2.49e-05	0.864	706	0.859983
ENSP00000244513	BTN1A1	2.35e-05	0.492	529	0.528909
ENSP00000244519	BTN3A3	9.42e-05	0.698	347	0.477193
ENSP00000244520	SNRPC	0.000105824	0.382	941	0.939031
ENSP00000244527	SLC17A1	1.79e-05	0.868	750	0.483081
ENSP00000244534	HIST1H1D	3.19e-05	0.92	729	0.833808
ENSP00000244537	HIST1H4G	2.27e-05	0.822	895	0
ENSP00000244565	UNC5CL	2.41e-05	0.73	578	0.423337
ENSP00000244571	AARS2	1.84e-05	0.938	670	0.762259
ENSP00000244573	HIST1H1A	3.97e-05	0.74	815	0.827963
ENSP00000244576	ZNF391	5.19e-05	0.446	501	0.99566
ENSP00000244601	HIST1H2BG	1.74e-05	0.896	868	0
ENSP00000244625	TBCC	3.24e-05	0.578	503	0
ENSP00000244661	HIST1H3B	2.05e-05	0.698	984	0
ENSP00000244709	TREM1	9.56e-05	0.686	254	0.546243
ENSP00000244711	MEA1	3.57e-05	0.678	659	0.388068
ENSP00000244728	COL21A1	2.42e-05	0.652	911	0.409044
ENSP00000244741	CDKN1A	3.22e-05	0.362	999	0
ENSP00000244745	SOX4	0.000146403	0.28	832	0.968173
ENSP00000244751	CPNE5	5.92e-05	0.468	493	0.439182
ENSP00000244763	SSR1	0.00016936	0.39	997	0.764406
ENSP00000244769	ATXN1	4.78e-05	0.498	961	0.84503
ENSP00000244869	EREG	2.07e-05	0.514	980	0.939947
ENSP00000244926	SCGB1D2	0.000206395	0.758	156	0.766621
ENSP00000244930	SCGB2A1	6.18e-05	0.86	223	0.24862
ENSP00000245046	EMC3	3.84e-05	0.842	564	0.204608
ENSP00000245105	SH3TC1	4.39e-05	0.354	503	0.388749
ENSP00000245121	KATNAL2	1.92e-05	0.576	487	0.325455
ENSP00000245157	BBS2	3.47e-05	0.51	888	0.686647
ENSP00000245185	MT2A	3.83e-05	0.82	915	0.31861
ENSP00000245206	GOT2	3.2e-05	0.51	968	0.658821
ENSP00000245222	SPHK2	3.29e-05	0.708	982	0.467543
ENSP00000245255	PIWIL1	9.76e-05	0.384	885	0.812662
ENSP00000245304	RAP2A	2.11e-05	0.418	940	0.992718
ENSP00000245312	SLC10A2	3.44e-05	0.79	564	0.349887
ENSP00000245323	EFNB2	3.09e-05	0.344	999	0.961452
ENSP00000245407	SLC22A5	0.000145197	0.398	212	0.40923
ENSP00000245414	IRF1	2.88e-05	0.348	988	0.943421
ENSP00000245451	BMP4	3.34e-05	0.33	987	0
ENSP00000245457	PTGER2	2.42e-05	0.498	903	0.745743
ENSP00000245479	SOX9	3.57e-05	0.386	953	0.987994
ENSP00000245503	MYH2	1.74e-05	0.658	953	0.969421
ENSP00000245539	MRPS7	1.36e-05	0.966	976	0.868578
ENSP00000245541	GGA3	5.27e-05	0.146	928	0
ENSP00000245543	ARMC7	2.94e-05	0.696	487	0.54105
ENSP00000245544	NUP85	3.01e-05	0.57	920	0.790774
ENSP00000245551	MIF4GD	2.89e-05	0.74	242	0.531054
ENSP00000245552	NT5C	2.32e-05	0.53	902	0.543812
ENSP00000245564	MSTO1	5.44e-05	0.864	473	0.339049
ENSP00000245615	MBOAT7	3.01e-05	0.752	372	0.307027
ENSP00000245620	LILRB3	1.72e-05	0.632	0	0.949526
ENSP00000245663	ZBTB46	5.95e-05	0.414	602	0.988099
ENSP00000245680	SLC35F5	5.13e-05	0.552	602	0.561539
ENSP00000245787	INSIG2	2.47e-05	0.874	699	0.568958
ENSP00000245796	PSD4	0.00012637	0.138	417	0.663818
ENSP00000245810	PSPN	7e-05	0.24	509	0.548975
ENSP00000245812	ALKBH7	1.06e-05	0.932	196	0.338422
ENSP00000245816	CLPP	2.24e-05	0.616	935	0.790974
ENSP00000245817	TNFSF9	9.19e-05	0.676	501	0.647548
ENSP00000245838	THOC2	3.61e-05	0.638	978	0.877079
ENSP00000245903	CD70	0.000367942	0.378	359	0.761164
ENSP00000245907	C3	1.36e-05	0.956	916	0.852958
ENSP00000245908	SH2D3A	0.000111986	0.66	822	0.521094
ENSP00000245919	FOSB	3.11e-05	0.394	999	0
ENSP00000245923	RTN2	0.000108819	0.05	447	0.188349
ENSP00000245932	VASP	5.78e-05	0.362	940	0.903447
ENSP00000245934	SYMPK	2.95e-05	0.744	617	0.621149
ENSP00000245957	C20orf26	4.32e-05	0.162	371	0
ENSP00000245960	CDC25B	7.63e-05	0.394	779	0.895979
ENSP00000245983	GNRH2	1.88e-05	0.856	946	0.904193
ENSP00000246000	-	2.61e-05	0.648	0	0
ENSP00000246006	CD93	2.17e-05	0.608	340	0.613885
ENSP00000246012	CST8	2.08e-05	0.566	452	0.66778
ENSP00000246020	CSTL1	0.00026857	0.378	216	0.418241
ENSP00000246024	TMX4	7.32e-05	0.594	386	0.451164
ENSP00000246041	AP5S1	0.000276254	0.318	860	0.60226
ENSP00000246062	MKKS	1.5e-05	0.594	984	0.90676
ENSP00000246069	DSTN	2e-05	0.446	909	0.784428
ENSP00000246070	LAMP5	3.17e-05	0.596	198	0.561619
ENSP00000246071	SNRPB2	3.22e-05	0.39	996	0.950185
ENSP00000246080	TCF15	2.45e-05	0.422	530	0.879806
ENSP00000246081	OTOR	4.29e-05	0.564	158	0.362762
ENSP00000246100	FAM110A	4.42e-05	0.588	306	0.41604
ENSP00000246104	SCRT2	2.72e-05	0.462	385	0.912569
ENSP00000246105	DEFB129	2.6e-05	0.728	264	0.629591
ENSP00000246112	TLE6	2.24e-05	0.61	697	0.947227
ENSP00000246115	S1PR4	1.94e-05	0.754	909	0.865794
ENSP00000246117	NCLN	3.85e-05	0.94	474	0.347332
ENSP00000246151	PITHD1	0.000684479	0.378	254	0.435381
ENSP00000246166	FNTB	3.79e-05	0.762	581	0.726388
ENSP00000246174	ARMCX5	7.06e-05	0.722	264	0.631143
ENSP00000246186	MMP24	5.16e-05	0.046	670	0.728572
ENSP00000246190	NECAB3	8.3e-05	0.784	216	0.311863
ENSP00000246194	RALY	2.45e-05	0.716	903	0.979557
ENSP00000246229	PLAGL2	2.24e-05	0.54	645	0.980479
ENSP00000246337	UROD	1.32e-05	0.866	396	0.72941
ENSP00000246421	SLC35E2	0.000502096	0.292	472	0.466195
ENSP00000246515	SLURP1	2.18e-05	0.662	370	0.263982
ENSP00000246529	LRFN3	2.8e-05	0.42	684	0.939702
ENSP00000246532	IGFLR1	4.88e-05	0.23	300	0.76691
ENSP00000246533	CAPNS1	2.47e-05	0.832	910	0.329119
ENSP00000246535	PDCD2L	3.6e-05	0.854	483	0.710522
ENSP00000246549	FFAR2	1.41e-05	0.926	900	0.848267
ENSP00000246551	HCST	0.000390009	0.376	410	0.580895
ENSP00000246553	FFAR1	1.11e-05	0.96	900	0.855165
ENSP00000246554	COX6B1	2.2e-05	0.93	993	0.619606
ENSP00000246635	KRT13	5.75e-05	0.76	376	0.345357
ENSP00000246646	KRT38	1.29e-05	0.912	0	0.511664
ENSP00000246657	CCR7	2.18e-05	0.57	961	0.939148
ENSP00000246662	KRT9	4.2e-05	0.93	588	0.261449
ENSP00000246672	NR1D1	4.87e-05	0.624	994	0.90917
ENSP00000246747	ARL2	5.34e-05	0.902	592	0.280508
ENSP00000246792	RRAS	1.73e-05	0.388	994	0.988398
ENSP00000246794	PRRG2	4.77e-05	0.572	355	0.307181
ENSP00000246801	TSKS	4.1e-05	0.536	263	0.445725
ENSP00000246802	GLTSCR2	1.95e-05	0.932	803	0.884382
ENSP00000246841	FLRT1	1.86e-05	0.564	284	0.771666
ENSP00000246868	SBDS	3.4e-05	0.676	603	0.692541
ENSP00000246891	CSN1S1	3.04e-05	0.294	725	0.406583
ENSP00000246895	STATH	2.09e-05	0.368	472	0.54703
ENSP00000246896	HTN1	2.66e-05	0.678	263	0.444728
ENSP00000246912	MLX	3.47e-05	0.704	455	0.892359
ENSP00000246914	WNK4	3.35e-05	0.816	361	0.458853
ENSP00000246949	DNASE1	2.02e-05	0.482	386	0.855929
ENSP00000246957	TRAP1	1.6e-05	0.692	904	0.789741
ENSP00000247001	SUGP1	4.38e-05	0.6	925	0.877206
ENSP00000247003	DDX49	2.13e-05	0.858	736	0.931112
ENSP00000247005	GDF1	0.000102961	0.276	538	0.966422
ENSP00000247020	SDF2	2.67e-05	0.644	609	0.260409
ENSP00000247026	NSRP1	0.000112268	0.606	412	0.384151
ENSP00000247087	AHDC1	0.000178902	0.9	370	0.443087
ENSP00000247138	SLC35A2	2e-05	0.67	462	0.394211
ENSP00000247153	CFP	9.55e-05	0.292	576	0.601855
ENSP00000247161	ELK1	0.000120486	0.182	953	0.863238
ENSP00000247170	DAAM1	1.51e-05	0.91	992	0
ENSP00000247178	ATG14	0.000274493	0.384	505	0.425642
ENSP00000247182	SIX1	3.42e-05	0.394	549	0.973847
ENSP00000247191	DLGAP5	4.75e-05	0.494	632	0.775336
ENSP00000247194	L3HYPDH	5.87e-05	0.414	221	0.394682
ENSP00000247207	HSPA2	2.24e-05	0.512	900	0.847687
ENSP00000247219	TBPL2	1.49e-05	0.816	994	0
ENSP00000247226	PLEKHG3	0.000136345	0.816	200	0.437125
ENSP00000247270	EVI2A	6.48e-05	0.832	661	0.268724
ENSP00000247271	OMG	2.16e-05	0.56	987	0.814899
ENSP00000247306	CTAG2	0.0216025	0.76	0	0.812752
ENSP00000247461	CANX	3.24e-05	0.414	968	0.70024
ENSP00000247470	PYCARD	2.81e-05	0.762	720	0.82459
ENSP00000247584	HIVEP3	2.57e-05	0.504	848	0.987466
ENSP00000247655	COX7C	3.21e-05	0.854	983	0.723531
ENSP00000247665	PHPT1	4.46e-05	0.8	238	0.310351
ENSP00000247668	TRAF2	9.6e-05	0.408	999	0.859727
ENSP00000247706	ABHD8	1.13e-05	0.916	0	0.733699
ENSP00000247712	MPV17L2	0.000149693	0.828	193	0
ENSP00000247815	HELB	3.28e-05	0.812	478	0.842292
ENSP00000247829	TSPAN8	1.96e-05	0.626	535	0.570905
ENSP00000247843	YEATS4	2.57e-05	0.504	994	0.967938
ENSP00000247866	NDUFB2	1.72e-05	0.848	944	0.67247
ENSP00000247879	TAS2R3	2.48e-05	0.712	900	0.87743
ENSP00000247881	TAS2R4	1.51e-05	0.892	900	0.845436
ENSP00000247883	TAS2R5	2.07e-05	0.862	900	0.873704
ENSP00000247933	IDUA	3.26e-05	0.568	900	0.225743
ENSP00000247956	ZNF317	2.24e-05	0.546	501	0.983644
ENSP00000247970	PIN1	3.35e-05	0.308	683	0.750964
ENSP00000247977	FBXL12	0.000381699	0.166	899	0.314456
ENSP00000247986	KIF17	4.41e-05	0.398	972	0.675189
ENSP00000247992	PLA2G2C	4.08e-05	0.456	900	0.286892
ENSP00000248041	CYP4F11	3.95e-05	0.826	492	0.879556
ENSP00000248070	EPS15L1	3.87e-05	0.458	967	0.600492
ENSP00000248071	KLF2	4.17e-05	0.434	886	0.970752
ENSP00000248076	F2RL3	1.67e-05	0.918	900	0.868091
ENSP00000248089	HCFC1R1	2.29e-05	0.602	0	0.744053
ENSP00000248098	HN1L	0.000197108	0.77	156	0.657774
ENSP00000248114	GFER	2.04e-05	0.76	929	0.476363
ENSP00000248121	SYNGR3	9.39e-05	0.716	212	0.369976
ENSP00000248139	RAB40C	2.61e-05	0.428	712	0.589986
ENSP00000248150	GNG13	3.08e-05	0.338	800	0.577417
ENSP00000248211	ZNF10	2.82e-05	0.496	501	0.992966
ENSP00000248244	TICAM1	4.53e-05	0.782	995	0.855557
ENSP00000248248	MON1B	2.95e-05	0.712	820	0.384141
ENSP00000248272	GAN	4.95e-05	0.722	906	0
ENSP00000248306	METTL25	4.1e-05	0.394	344	0.545725
ENSP00000248342	EIF3K	2.52e-05	0.87	999	0.877979
ENSP00000248378	EMC6	5.9e-05	0.792	239	0.45508
ENSP00000248420	CACTIN	3.45e-05	0.822	212	0.462386
ENSP00000248437	TUBA4A	2.94e-05	0.402	956	0.882549
ENSP00000248444	VIL1	1.31e-05	0.774	634	0.780278
ENSP00000248450	AAMP	2.44e-05	0.892	504	0.749146
ENSP00000248553	HSPB1	4.03e-05	0.476	959	0.937595
ENSP00000248564	GNG11	2.35e-05	0.65	810	0.48785
ENSP00000248566	SHFM1	3.62e-05	0.586	436	0.736956
ENSP00000248594	PTPN12	2.94e-05	0.466	963	0.856343
ENSP00000248600	STYXL1	2.51e-05	0.398	539	0.894309
ENSP00000248633	PEX1	2.23e-05	0.778	422	0.508688
ENSP00000248643	MTERF	3.27e-05	0.564	351	0
ENSP00000248668	LRFN1	2.61e-05	0.394	684	0.919474
ENSP00000248673	ZFP36	0.000106646	0.388	729	0
ENSP00000248701	SPINK2	2.73e-05	0.674	250	0.396196
ENSP00000248706	RASL11B	1.3e-05	0.718	559	0.997105
ENSP00000248846	TUBGCP6	2.54e-05	0.882	999	0.595514
ENSP00000248879	DGCR6L	2.08e-05	0.668	228	0.490276
ENSP00000248901	CYTH4	8.8e-05	0.148	401	0.567828
ENSP00000248923	GGT1	2.66e-05	0.468	921	0.927102
ENSP00000248929	SGSM3	2.42e-05	0.796	907	0.438035
ENSP00000248933	SEZ6L	1.98e-05	0.716	263	0.454849
ENSP00000248935	GSTT1	1.61e-05	0.814	945	0
ENSP00000248948	VPREB3	4.56e-05	0.538	193	0.332177
ENSP00000248958	SDF2L1	7.16e-05	0.664	937	0.290946
ENSP00000248975	YWHAH	2.84e-05	0.402	985	0.988943
ENSP00000248984	C22orf24	3.96e-05	0.75	0	0
ENSP00000248996	GNAZ	3.04e-05	0.43	948	0
ENSP00000249005	A4GALT	2.05e-05	0.814	472	0.339947
ENSP00000249007	RFPL3	4.44e-05	0.716	394	0.626176
ENSP00000249014	CDC42EP1	0.000279171	0.878	0	0.519394
ENSP00000249016	MCHR1	1.27e-05	0.94	906	0.81426
ENSP00000249041	GALR3	1.54e-05	0.906	900	0.863826
ENSP00000249042	TST	2.64e-05	0.386	946	0.526454
ENSP00000249044	APOL5	3.9e-05	0.53	159	0.414924
ENSP00000249064	CCDC117	0.000402326	0.396	215	0.552943
ENSP00000249066	APOL2	5.19e-05	0.846	258	0.531119
ENSP00000249071	RAC2	1.48e-05	0.53	973	0.963227
ENSP00000249075	LIF	2.85e-05	0.442	928	0.78943
ENSP00000249079	C22orf23	1.81e-05	0.78	0	0.632623
ENSP00000249116	APOBEC3A	2.02e-05	0.844	242	0.476095
ENSP00000249269	PMPCB	2.03e-05	0.8	942	0.693611
ENSP00000249284	TAS2R16	2e-05	0.958	900	0.834486
ENSP00000249299	NAA38	3.59e-05	0.462	575	0.377346
ENSP00000249330	VGF	4.16e-05	0.302	887	0.475751
ENSP00000249344	STRIP2	4.93e-05	0.486	999	0.26004
ENSP00000249356	DNAJB9	6.66e-05	0.406	902	0.751341
ENSP00000249363	LRRC4	2.63e-05	0.426	684	0.932593
ENSP00000249373	SMO	2.64e-05	0.302	917	0.922754
ENSP00000249389	OPN1SW	9.28e-05	0.306	489	0.535215
ENSP00000249396	SIRT2	4.47e-05	0.392	962	0.950861
ENSP00000249440	HOXD3	3.18e-05	0.214	325	0.977804
ENSP00000249442	MTX2	3.9e-05	0.96	921	0.479488
ENSP00000249499	HOXD9	3.27e-05	0.308	704	0.97057
ENSP00000249501	HOXD10	3.16e-05	0.22	645	0.965896
ENSP00000249504	HOXD11	2.86e-05	0.232	645	0.967379
ENSP00000249598	GDF2	3.37e-05	0.24	442	0
ENSP00000249601	ARHGAP22	2.61e-05	0.632	342	0.811912
ENSP00000249636	PIAS1	6.13e-05	0.388	999	0.953959
ENSP00000249647	SNAP23	0.000175553	0.354	993	0.713601
ENSP00000249700	TMOD2	0.000105965	0.554	485	0.311464
ENSP00000249749	DLL4	0.000103233	0.372	910	0.963471
ENSP00000249750	ALDH1A2	2.18e-05	0.424	866	0.842144
ENSP00000249776	KNSTRN	3.44e-05	0.72	700	0.585577
ENSP00000249806	CLN6	6.57e-05	0.698	477	0.281927
ENSP00000249822	ARPP19	0.000443606	0.322	902	0.652918
ENSP00000249842	ISLR	2.76e-05	0.418	684	0.946582
ENSP00000249861	THAP10	0.00141994	0.29	328	0.55443
ENSP00000249883	AMOTL2	5.7e-05	0.82	902	0.265839
ENSP00000249887	CCRL1	5.89e-05	0.354	379	0
ENSP00000249910	MBD4	4.72e-05	0.636	644	0.860943
ENSP00000249923	COPB1	6.35e-05	0.46	790	0.624641
ENSP00000250003	MYOD1	2.92e-05	0.382	994	0
ENSP00000250018	TPH1	1.88e-05	0.874	503	0.638463
ENSP00000250056	FAM64A	4.99e-05	0.696	309	0.366912
ENSP00000250066	USP6	2.36e-05	0.542	643	0.485212
ENSP00000250076	ZNF232	2.74e-05	0.464	501	0.991929
ENSP00000250101	TXNDC17	7.85e-05	0.736	938	0.265498
ENSP00000250111	ATP1B2	3.07e-05	0.902	904	0.775525
ENSP00000250113	FXR2	0.000115109	0.41	899	0.864931
ENSP00000250124	MPDU1	0.000153289	0.376	418	0.302149
ENSP00000250144	MMP28	4.91e-05	0.174	609	0
ENSP00000250151	CCL4	2.27e-05	0.786	918	0
ENSP00000250156	MRM1	2.03e-05	0.776	506	0
ENSP00000250160	WISP1	6.74e-05	0.12	806	0.629684
ENSP00000250173	LRRC6	2.29e-05	0.69	348	0.748031
ENSP00000250237	QTRT1	3.52e-05	0.836	758	0.598854
ENSP00000250244	AP1M2	2.49e-05	0.78	900	0.604707
ENSP00000250263	ERI1	3.62e-05	0.88	498	0.682496
ENSP00000250340	CLEC11A	0.000245893	0.568	201	0.324423
ENSP00000250351	KLK12	1.81e-05	0.79	286	0.328586
ENSP00000250378	CMA1	2.21e-05	0.34	514	0.769761
ENSP00000250405	BCL2L2	8.99e-05	0.276	429	0.883972
ENSP00000250416	PARP2	3.93e-05	0.48	710	0.814616
ENSP00000250448	FOXA1	2.76e-05	0.432	953	0
ENSP00000250454	EAPP	0.000470272	0.43	300	0.325351
ENSP00000250457	EGLN3	3.12e-05	0.48	956	0.92253
ENSP00000250495	NEDD8	2.07e-05	0.624	999	0.805816
ENSP00000250498	DAD1	3.45e-05	0.744	854	0.323272
ENSP00000250535	CDO1	3.98e-05	0.706	942	0.261811
ENSP00000250559	RAP1B	1.43e-05	0.668	996	0.994608
ENSP00000250615	AANAT	1.81e-05	0.674	913	0.459206
ENSP00000250617	ARHGEF6	4.51e-05	0.408	940	0.564346
ENSP00000250699	CHRNA10	2.55e-05	0.706	191	0.339556
ENSP00000250784	RPS4Y1	2.07e-05	0.838	978	0.915002
ENSP00000250823	VCY1B	3.51e-05	0.678	341	0.616466
ENSP00000250825	VCY	0.000329606	0.132	0	0.953853
ENSP00000250831	RBMY1J	2.33e-05	0.588	0	0.962076
ENSP00000250838	CDY2A	1e-05	0.962	768	0
ENSP00000250863	DAZL	4.43e-05	0.414	859	0.920974
ENSP00000250894	MAPK8IP3	3.2e-05	0.128	996	0.481157
ENSP00000250896	MKNK2	0.000254776	0.38	926	0.716557
ENSP00000250916	KLF16	2.49e-05	0.424	972	0.984438
ENSP00000250937	DOHH	3.2e-05	0.534	736	0.904524
ENSP00000250971	INS	1.84e-05	0.81	998	0
ENSP00000250974	ABHD17A	7.43e-05	0.784	357	0.514026
ENSP00000251020	SALL1	4.02e-05	0.4	917	0.964436
ENSP00000251038	ZC3H14	3.46e-05	0.452	663	0.799661
ENSP00000251047	LMAN1	0.00010267	0.384	692	0.496567
ENSP00000251074	NUP37	4.04e-05	0.812	900	0.682146
ENSP00000251089	ANGEL1	5.72e-05	0.714	620	0.436391
ENSP00000251102	CNGB1	2.28e-05	0.67	860	0.542839
ENSP00000251108	CDADC1	1.66e-05	0.88	509	0.41883
ENSP00000251127	NALCN	2.77e-05	0.766	329	0.563756
ENSP00000251166	CORO7	0.000138997	0.74	569	0.430303
ENSP00000251170	SEC14L5	2.67e-05	0.77	755	0.427203
ENSP00000251203	PBX4	3.62e-05	0.31	850	0.942022
ENSP00000251241	DHX40	2.32e-05	0.706	669	0.952522
ENSP00000251250	DTWD1	0.000347606	0.736	191	0.77161
ENSP00000251269	ZNF221	3.31e-05	0.39	584	0.996388
ENSP00000251287	HCN2	4.31e-05	0.658	491	0.680088
ENSP00000251289	WDR18	5.5e-05	0.648	648	0.496437
ENSP00000251296	IGSF21	0.000123953	0.196	325	0.567381
ENSP00000251303	SLX1A	2.65e-05	0.652	333	0.642826
ENSP00000251312	DHRS11	3.31e-05	0.856	509	0
ENSP00000251337	GNAT2	1.68e-05	0.736	933	0.988732
ENSP00000251343	KHNYN	0.000427997	0.776	226	0.651099
ENSP00000251363	CERS4	2.9e-05	0.316	961	0.528781
ENSP00000251372	LILRA1	1.72e-05	0.596	0	0.952557
ENSP00000251377	LILRA2	1.72e-05	0.604	0	0.952757
ENSP00000251390	LILRA3	1.72e-05	0.594	0	0
ENSP00000251412	TUBG2	1.48e-05	0.8	905	0.943993
ENSP00000251453	RPS16	1.85e-05	0.794	999	0.88251
ENSP00000251472	MAST1	4.92e-05	0.512	567	0.550482
ENSP00000251473	DKFZP761J1410	3.09e-05	0.574	420	0
ENSP00000251496	NCAPG	3.28e-05	0.684	888	0.73063
ENSP00000251507	RABGAP1L	2.13e-05	0.564	628	0.444343
ENSP00000251527	ESYT2	7.78e-05	0.46	490	0.431246
ENSP00000251535	ALOX12	4.3e-05	0.216	608	0.342857
ENSP00000251547	FBXO44	6.62e-05	0.37	999	0.350309
ENSP00000251566	UGT2A3	0.000277725	0.056	248	0.261817
ENSP00000251582	ADAMTS2	1.85e-05	0.762	468	0.630552
ENSP00000251588	NARFL	3.07e-05	0.596	663	0.329518
ENSP00000251595	HBA2	2.54e-05	0.754	400	0.428466
ENSP00000251607	TRNT1	3.06e-05	0.68	734	0.742314
ENSP00000251630	PDGFRL	1.76e-05	0.51	636	0.995616
ENSP00000251636	DHX29	2.2e-05	0.732	577	0.948777
ENSP00000251642	DHX58	1.96e-05	0.626	579	0.743937
ENSP00000251645	KRT31	1.27e-05	0.79	740	0.302038
ENSP00000251691	KIAA1244	3.41e-05	0.466	576	0
ENSP00000251757	PHC1	0.000269143	0.338	952	0
ENSP00000251775	SNX4	0.000108083	0.146	732	0.791686
ENSP00000251776	ROPN1B	0.000104272	0.298	584	0.629768
ENSP00000251809	SPAG1	1.66e-05	0.558	483	0.99129
ENSP00000251810	RRM2B	1.93e-05	0.606	931	0.822439
ENSP00000251849	RAF1	3.53e-05	0.336	999	0.960795
ENSP00000251864	TDRD1	0.000115369	0.388	612	0.383498
ENSP00000251871	MED17	5.43e-05	0.378	999	0.943042
ENSP00000251921	NXPE1	5.04e-05	0.4	302	0.582876
ENSP00000251968	TSG101	5.55e-05	0.23	999	0.593768
ENSP00000251973	CARD10	2.5e-05	0.486	610	0.795363
ENSP00000251993	KIAA0930	3.62e-05	0.908	547	0.343031
ENSP00000252011	DHX35	1.65e-05	0.942	662	0.966231
ENSP00000252015	TRPC4AP	2.93e-05	0.86	363	0.31804
ENSP00000252029	TYMP	0.000116827	0.39	686	0.713796
ENSP00000252032	C20orf194	3.71e-05	0.67	158	0.608852
ENSP00000252034	ELN	6.64e-05	0.258	576	0.393423
ENSP00000252037	FKBP6	1.62e-05	0.628	475	0.63752
ENSP00000252050	CUL9	5.72e-05	0.898	335	0.409746
ENSP00000252071	ACTR3C	1.47e-05	0.76	881	0.998145
ENSP00000252085	PCDHGA12	1.81e-05	0.826	420	0.398647
ENSP00000252087	PCDHGC5	5.15e-05	0.3	411	0.353458
ENSP00000252102	NDUFA2	2.46e-05	0.944	999	0.722899
ENSP00000252115	POLDIP3	2.89e-05	0.628	650	0.900339
ENSP00000252136	TRMT2A	1.99e-05	0.954	570	0.806927
ENSP00000252137	DGCR14	2.88e-05	0.766	858	0.486863
ENSP00000252172	MYH13	1.88e-05	0.716	900	0.844372
ENSP00000252211	ZKSCAN3	2.5e-05	0.54	550	0.989137
ENSP00000252229	MICB	7.19e-05	0.374	165	0.564867
ENSP00000252242	KRT5	2.78e-05	0.498	923	0.881407
ENSP00000252244	KRT1	3.74e-05	0.434	644	0.680192
ENSP00000252245	KRT75	4.4e-05	0.768	507	0.363091
ENSP00000252250	KRT6C	4.81e-05	0.758	459	0.381701
ENSP00000252252	KRT6B	3.23e-05	0.882	459	0.275655
ENSP00000252318	GALNT8	4.58e-05	0.384	907	0.477849
ENSP00000252321	KCNA5	2.48e-05	0.372	975	0.72119
ENSP00000252329	PSMG3	0.000258564	0.388	452	0.409369
ENSP00000252338	FAM155B	1.53e-05	0.676	407	0.531695
ENSP00000252445	ELOF1	8.16e-05	0.566	719	0.452788
ENSP00000252453	C19orf80	7.3e-05	0.178	329	0.437504
ENSP00000252455	PRKCSH	5.95e-05	0.526	987	0
ENSP00000252456	CNN1	2.82e-05	0.678	586	0.637032
ENSP00000252463	ZSCAN10	2.79e-05	0.552	979	0.987693
ENSP00000252482	EXOC3L2	2.27e-05	0.552	974	0.517392
ENSP00000252483	PVRL2	4.99e-05	0.896	901	0.220625
ENSP00000252486	APOE	2.22e-05	0.548	993	0.954444
ENSP00000252487	TOMM40	1.73e-05	0.93	999	0.602486
ENSP00000252491	APOC1	2.51e-05	0.604	396	0
ENSP00000252505	ALLC	2.43e-05	0.308	503	0.55604
ENSP00000252506	GADD45G	3.57e-05	0.256	995	0.778057
ENSP00000252512	XPO7	7.02e-05	0.796	700	0.376968
ENSP00000252519	ACE2	2.62e-05	0.432	835	0.539328
ENSP00000252530	FAM98C	3.69e-05	0.858	295	0.3883
ENSP00000252542	SAFB2	4.96e-05	0.52	819	0.765213
ENSP00000252543	RPL36	2.3e-05	0.758	975	0.887071
ENSP00000252575	NCAN	2.81e-05	0.274	914	0.56028
ENSP00000252590	PLVAP	3.01e-05	0.476	462	0.247103
ENSP00000252593	BST2	2.41e-05	0.96	515	0.611459
ENSP00000252595	SLC27A1	3.15e-05	0.646	910	0.603428
ENSP00000252597	USHBP1	5.98e-05	0.132	605	0.531139
ENSP00000252599	COLGALT1	0.00185253	0.394	644	0.412306
ENSP00000252603	PGLS	3.09e-05	0.63	560	0.576777
ENSP00000252622	LSM7	4.06e-05	0.516	970	0.834581
ENSP00000252655	RSPH3	9.27e-05	0.886	191	0.455188
ENSP00000252660	MAS1	1.64e-05	0.922	247	0.361447
ENSP00000252669	ACSBG2	3.34e-05	0.642	654	0
ENSP00000252674	MLLT1	3.84e-05	0.176	977	0.93314
ENSP00000252675	FUT5	2.5e-05	0.626	900	0.649731
ENSP00000252677	BMP15	2.32e-05	0.42	393	0.943311
ENSP00000252699	ACTN4	5.67e-05	0.368	932	0.753745
ENSP00000252711	NDUFA10	3.32e-05	0.8	948	0.720859
ENSP00000252723	EPO	9.95e-05	0.278	994	0.908034
ENSP00000252725	ARPC1B	4.72e-05	0.53	999	0.610118
ENSP00000252729	CACNG6	4.52e-05	0.296	800	0.726272
ENSP00000252744	ZSWIM6	3.74e-05	0.584	374	0.460021
ENSP00000252771	FCHO1	2.04e-05	0.95	741	0.380092
ENSP00000252785	SCO2	2.66e-05	0.786	644	0.535375
ENSP00000252797	ZNF764	5.83e-05	0.414	501	0.989136
ENSP00000252799	ZNF747	7.23e-05	0.404	501	0.99423
ENSP00000252804	PXDN	3.75e-05	0.244	382	0.315897
ENSP00000252809	GDF15	6.29e-05	0.378	913	0.965001
ENSP00000252818	JUND	2.8e-05	0.334	998	0
ENSP00000252825	HRC	2.78e-05	0.6	300	0.281668
ENSP00000252826	TRPM4	4.51e-05	0.574	789	0.765719
ENSP00000252840	ZNF557	2.83e-05	0.424	501	0.996112
ENSP00000252854	OLFM1	2.95e-05	0.432	360	0.380119
ENSP00000252891	NUMBL	2.06e-05	0.494	496	0.838398
ENSP00000252898	TNNI2	1.52e-05	0.872	801	0.497495
ENSP00000252934	ATXN10	6.54e-05	0.682	570	0.303851
ENSP00000252936	TUBGCP2	3.04e-05	0.698	995	0.580229
ENSP00000252939	CALY	5.4e-05	0.33	669	0.394173
ENSP00000252945	CYP2E1	2.28e-05	0.828	829	0.581861
ENSP00000252951	HBZ	3.3e-05	0.72	886	0.560897
ENSP00000252971	MNX1	3.75e-05	0.348	912	0.987439
ENSP00000252979	ZNF337	2.32e-05	0.526	501	0.994121
ENSP00000252992	CEP85	7.05e-05	0.944	181	0.494278
ENSP00000252996	TAF4	8.99e-05	0.464	981	0.961693
ENSP00000252997	GATA5	1.38e-05	0.81	583	0
ENSP00000252998	RBBP8NL	2.02e-05	0.796	349	0.508453
ENSP00000252999	LAMA5	4.1e-05	0.558	916	0.734686
ENSP00000253003	ADRM1	3.52e-05	0.554	717	0.725813
ENSP00000253004	ASS1	2.13e-05	0.812	911	0.752244
ENSP00000253008	PRDM12	5.28e-05	0.384	263	0.560899
ENSP00000253023	UBE2M	4.01e-05	0.658	999	0.598097
ENSP00000253024	TRIM28	3.07e-05	0.878	982	0.932773
ENSP00000253031	YIPF2	0.000376887	0.322	997	0.372189
ENSP00000253039	EIF2S3	8.64e-05	0.332	993	0.912763
ENSP00000253047	TMEM160	9.2e-05	0.762	211	0.461411
ENSP00000253048	ZC3H4	7.01e-05	0.648	644	0.648078
ENSP00000253055	MAP3K10	1.53e-05	0.534	648	0.996921
ENSP00000253063	SESN2	4.14e-05	0.796	836	0.677755
ENSP00000253079	CCDC62	2.28e-05	0.816	205	0.416187
ENSP00000253083	HIP1R	6.14e-05	0.246	917	0.472124
ENSP00000253099	MRPL4	1.51e-05	0.89	961	0.884273
ENSP00000253108	EIF3G	2.52e-05	0.736	999	0.927415
ENSP00000253109	ANGPTL6	5.5e-05	0.34	296	0.405425
ENSP00000253110	C19orf66	2.15e-05	0.632	223	0.666652
ENSP00000253115	ZNF426	5.44e-05	0.392	571	0.99072
ENSP00000253122	SLC6A8	1.88e-05	0.696	378	0.535988
ENSP00000253144	ZNF331	2.29e-05	0.614	501	0.985698
ENSP00000253159	ZNF236	2.15e-05	0.652	501	0.988636
ENSP00000253188	SLC7A10	2.78e-05	0.91	319	0.529584
ENSP00000253193	LRP3	5.32e-05	0.308	282	0.227889
ENSP00000253233	C12orf65	2.4e-05	0.854	616	0.746734
ENSP00000253237	GRWD1	1.56e-05	0.946	808	0.948488
ENSP00000253247	NOL11	2.45e-05	0.69	323	0.503873
ENSP00000253255	PKDREJ	2.81e-05	0.468	391	0.312511
ENSP00000253262	NUTMF	2.64e-05	0.774	0	0
ENSP00000253270	SLC35D2	2.11e-05	0.682	900	0.378797
ENSP00000253303	RGN	2.11e-05	0.646	374	0.528957
ENSP00000253329	PPIL4	1.96e-05	0.912	716	0.744446
ENSP00000253332	AKAP12	4.25e-05	0.58	835	0.634622
ENSP00000253339	LATS1	1.48e-05	0.71	906	0.990873
ENSP00000253363	RBM39	7.31e-05	0.378	702	0.929488
ENSP00000253381	DEFB118	1.92e-05	0.676	254	0.443069
ENSP00000253382	ACSS2	2.28e-05	0.764	949	0.676671
ENSP00000253392	EDA2R	2.21e-05	0.82	227	0.864553
ENSP00000253401	ARHGEF9	5.47e-05	0.11	377	0.390488
ENSP00000253407	C1QL1	0.00161654	0.294	214	0.529714
ENSP00000253408	GFAP	3.2e-05	0.486	900	0.916306
ENSP00000253410	HIGD1B	3.14e-05	0.736	358	0.356777
ENSP00000253413	ATP6V1E1	2.56e-05	0.914	748	0.445844
[truncated: 15,008 more rows]
