# Supplementary material for: Identification of Novel Lung Cancer Driver Genes Connecting Different Omics Levels With a Heat Diffusion Algorithm
Source: Front Cell Dev Biol. 2022 Jan 26;10:825272. doi: 10.3389/fcell.2022.825272 (PMC8826452; doi:10.3389/fcell.2022.825272)
Supplement: Supplementary file 4 [file Table1.XLSX]

## Sheet: Sheet1
Ensembl ID	Gene symbol	Heat	P-value	MAS	MFS
ENSP00000000412	M6PR	1.49e-05	0.914	282	0.409233
ENSP00000000442	ESRRA	3.71e-05	0.876	903	0.927946
ENSP00000001008	FKBP4	1.14e-05	0.988	398	0.676356
ENSP00000001146	CYP26B1	3.59e-05	0.794	271	0.759359
ENSP00000002125	NDUFAF7	1.14e-05	0.99	0	0.309645
ENSP00000002165	FUCA2	1.62e-05	0.996	0	0.215008
ENSP00000002596	HS3ST1	4.05e-05	0.662	167	0.248024
ENSP00000002829	SEMA3F	7.32e-05	0.168	322	0.594468
ENSP00000003100	CYP51A1	2.19e-05	0.984	442	0.600565
ENSP00000003302	USP28	2.3e-05	0.978	165	0.326034
ENSP00000004103	TMEM176A	5.86e-05	0.398	203	0.443019
ENSP00000004531	SLC7A2	1.01e-05	0.978	152	0.795063
ENSP00000004921	CCL18	1.6e-05	0.68	437	0
ENSP00000004982	HSPB6	2.19e-05	0.596	170	0.292327
ENSP00000005180	CCL26	2.69e-05	0.5	0	0.601233
ENSP00000005226	USH1C	1.83e-05	0.51	181	0.376029
ENSP00000005260	BAIAP2L1	4.47e-05	0.756	155	0.199489
ENSP00000005284	CACNG3	3.52e-05	0.216	360	0.359199
ENSP00000005286	TMEM132A	5.45e-05	0.696	157	0.420921
ENSP00000005340	DVL2	2.47e-05	0.404	868	0.901565
ENSP00000005386	RPAP3	1.47e-05	0.994	0	0.205188
ENSP00000005558	IFRD1	1.57e-05	0.96	966	0.527851
ENSP00000005587	SKAP2	1.16e-05	0.992	0	0.163431
ENSP00000005905	-	1.96e-05	0.998	0	0
ENSP00000005995	PRSS21	1.41e-05	0.992	0	0.126365
ENSP00000006053	CX3CL1	2.5e-05	0.124	560	0.697542
ENSP00000006101	COPZ2	1.53e-05	0.946	227	0
ENSP00000006275	TRAPPC6A	1.08e-05	0.814	154	0.318018
ENSP00000006526	WDR54	0.000215841	0.178	506	0.521875
ENSP00000006724	CEACAM7	1.38e-05	0.42	0	0.299909
ENSP00000007264	RPUSD1	2.83e-05	0.634	330	0.699001
ENSP00000007390	TSR3	4.42e-05	0.732	475	0.196404
ENSP00000007699	YBX2	2.51e-05	0.902	392	0.681826
ENSP00000007722	ITGA3	2.79e-05	0.558	165	0.597405
ENSP00000007969	LRRC23	1.45e-05	0.926	378	0.798921
ENSP00000008391	TFAP2D	7.65e-05	0.742	285	0.584164
ENSP00000008527	CRY1	3.55e-05	0.402	833	0.803707
ENSP00000009041	STARD3NL	0.000163485	0.946	0	0.279914
ENSP00000009105	CAMK1G	1.32e-05	0.73	196	0.98888
ENSP00000009180	CD9	2.79e-05	0.12	484	0.782398
ENSP00000009530	CD74	1.98e-05	0.708	222	0.707547
ENSP00000010132	DYRK4	1.33e-05	0.608	283	0.993144
ENSP00000010299	FAM76A	0.000187518	0.898	241	0.437688
ENSP00000011292	CPA1	5.11e-05	0.138	264	0.265449
ENSP00000011473	SYPL1	5.63e-05	1	0	0.39042
ENSP00000011619	RANBP9	1.28e-05	0.958	181	0.43771
ENSP00000011684	PLEKHG6	2.73e-05	0.818	196	0.21502
ENSP00000011691	SS18L2	2.38e-05	0.992	0	0.410897
ENSP00000012049	QPCTL	7.13e-05	0.33	360	0.251025
ENSP00000012134	HIVEP2	2.33e-05	0.266	365	0.974179
ENSP00000013070	UBR7	2.75e-05	0.988	0	0.344779
ENSP00000013125	MAP4K5	1.65e-05	0.888	246	0.984403
ENSP00000013222	INMT	4.5e-05	0.294	179	0.365879
ENSP00000013807	ERCC1	1.69e-05	0.778	435	0.644493
ENSP00000014914	GPRC5A	2.26e-05	0.998	0	0.306347
ENSP00000014930	HEBP1	7.32e-05	0.252	900	0.937548
ENSP00000014935	DNASE1L1	1.27e-05	0.924	0	0.285215
ENSP00000016171	COX15	1.91e-05	0.804	215	0.257983
ENSP00000016946	RGPD5	1.19e-05	0.874	241	0.980472
ENSP00000017003	XYLT2	1.36e-05	0.71	175	0.265796
ENSP00000019103	SCTR	6.13e-05	0.03	985	0.784152
ENSP00000019317	RALBP1	1.45e-05	0.934	150	0.434685
ENSP00000020673	PSD	1.66e-05	0.904	190	0.348726
ENSP00000020926	SYT13	0.000103909	0.072	887	0.239626
ENSP00000020945	SNAI2	5.09e-05	0.08	850	0.980285
ENSP00000023064	SLC7A9	1.4e-05	0.942	392	0.743716
ENSP00000023897	GABRA1	4.04e-05	0.13	902	0.674471
ENSP00000023939	RTFDC1	3.22e-05	0.99	0	0.436546
ENSP00000024061	SLC45A4	3.45e-05	0.776	511	0.327094
ENSP00000025301	AKAP11	3.12e-05	0.996	0	0.194265
ENSP00000027335	CDH17	2.16e-05	0.088	889	0.888327
ENSP00000029410	B4GALT7	1.71e-05	0.692	151	0.483138
ENSP00000033079	FAM13B	6.28e-05	0.774	186	0.671726
ENSP00000035307	CHPF2	2.41e-05	0.486	165	0.309511
ENSP00000035383	LRRC7	1.73e-05	0.732	234	0.788159
ENSP00000037243	GABARAPL2	1.66e-05	0.928	802	0.333328
ENSP00000037502	MYOC	4.63e-05	0.14	361	0.589096
ENSP00000037869	FAM136A	2.14e-05	1	0	0.396562
ENSP00000039989	TTC17	2.29e-05	0.992	0	0.497293
ENSP00000040584	HOXC8	0.000161679	0.048	499	0.981007
ENSP00000040663	MRI1	3.28e-05	0.866	169	0.332427
ENSP00000040738	BOD1L1	2.06e-05	0.986	0	0.356605
ENSP00000040877	TARBP1	1.44e-05	0.97	240	0.700797
ENSP00000042931	BEST2	6.75e-05	0.13	540	0.391155
ENSP00000043402	RTN4R	1.53e-05	0.658	271	0.777488
ENSP00000044462	PSMA4	1.39e-05	0.872	323	0.448643
ENSP00000046087	ZPBP	4.26e-05	0.25	194	0.152886
ENSP00000046794	LCP2	1.84e-05	0.902	227	0.72065
ENSP00000052754	DCN	1.69e-05	0.168	450	0.847465
ENSP00000053243	TNFRSF17	2.12e-05	0.67	203	0.618814
ENSP00000053468	MRPS10	1.19e-05	0.992	388	0.816458
ENSP00000053469	GUCA1A	2.67e-05	0.172	906	0.472736
ENSP00000053867	GRN	1.86e-05	0.664	259	0.706263
ENSP00000054650	THAP3	3.56e-05	1	0	0.388021
ENSP00000054666	VAMP3	1.24e-05	0.872	569	0.565743
ENSP00000054668	UTS2	4.73e-05	0.094	902	0.691819
ENSP00000054950	RCN1	1.99e-05	0.688	561	0.619813
ENSP00000055682	KIAA2022	1.23e-05	0.726	0	0.243242
ENSP00000056217	ARHGEF5	1.05e-05	0.98	237	0.674066
ENSP00000056233	NFE2L3	0.00011012	0.12	272	0.878915
ENSP00000057513	TNIP3	4.93e-05	0.718	169	0.279596
ENSP00000058691	HEBP2	3.42e-05	0.982	0	0
ENSP00000061240	TLL1	0.000133666	0.086	656	0.599306
ENSP00000062104	NNAT	0.000100702	0.204	282	0.305671
ENSP00000064571	CBLN4	4.66e-05	0.288	226	0.315441
ENSP00000064724	CLDN11	1.98e-05	0.488	242	0.562538
ENSP00000064780	RELT	4.7e-05	0.27	198	0.307248
ENSP00000070846	PKP2	1e-05	0.976	298	0.490424
ENSP00000071281	FHL1	2.82e-05	0.944	192	0.593092
ENSP00000072644	YIPF1	5.19e-05	0.51	386	0.748268
ENSP00000072869	ADCK2	1.23e-05	0.998	0	0.200735
ENSP00000074304	INPP4A	3.17e-05	0.808	168	0.15347
ENSP00000075120	SLC2A3	1.92e-05	0.896	207	0.446658
ENSP00000075503	STYK1	1.2e-05	0.806	223	0.994955
ENSP00000078429	GNA11	1.36e-05	0.666	942	0.897559
ENSP00000078445	CREB3L3	1.86e-05	0.522	248	0.577297
ENSP00000081029	MRPS35	2.85e-05	0.866	196	0.487617
ENSP00000084798	CA11	4.71e-05	0.21	242	0.625981
ENSP00000085068	ISOC2	2e-05	0.996	0	0.372019
ENSP00000085219	CD22	1.93e-05	0.798	751	0.70863
ENSP00000086933	GSC2	6.15e-05	0.092	387	0.929714
ENSP00000155093	ZFY	1.68e-05	0.712	261	0.981791
ENSP00000155840	KCNQ1	2.51e-05	0.176	914	0.577416
ENSP00000155858	TRPM5	1.5e-05	0.66	417	0.378425
ENSP00000155926	TRIB2	1.05e-05	0.878	392	0.989891
ENSP00000156109	GPKOW	1.98e-05	0.592	198	0.287378
ENSP00000156471	AQR	2.03e-05	0.876	209	0.670466
ENSP00000156626	ST6GALNAC1	2.55e-05	0.69	213	0.601696
ENSP00000156825	MBD3	7.96e-05	0.962	0	0.833563
ENSP00000157600	LMCD1	4.79e-05	0.34	224	0.32924
ENSP00000157812	PSMC4	1.04e-05	0.966	186	0.552986
ENSP00000158166	CAMKK1	2.76e-05	0.284	921	0.781053
ENSP00000158771	DERL2	3.43e-05	0.318	486	0.505498
ENSP00000159060	NOX3	4.03e-05	0.194	448	0.694999
ENSP00000159087	ANO8	1.1e-05	0.992	0	0.168527
ENSP00000159111	KDM4B	1.3e-05	0.986	0	0.804876
ENSP00000160262	ICAM3	2.9e-05	0.266	347	0.690156
ENSP00000160373	CTTNBP2	2.38e-05	0.276	415	0.642514
ENSP00000160740	CIC	1.12e-05	0.74	0	0.662485
ENSP00000161559	CEACAM1	1.54e-05	0.68	192	0.658966
ENSP00000162023	MEF2BNB-MEF2B	2.11e-05	0.188	862	0
ENSP00000162044	TMEM161A	4.49e-05	0.996	0	0.529554
ENSP00000162391	FOXJ2	2.83e-05	0.276	402	0
ENSP00000162749	TNFRSF1A	1.92e-05	0.612	301	0.812542
ENSP00000163416	GOLGA5	2.08e-05	0.372	394	0.358444
ENSP00000164024	CELSR3	4.46e-05	0.138	345	0.522746
ENSP00000164133	PPP2R5B	1.39e-05	0.872	800	0.668743
ENSP00000164139	PYGM	1.55e-05	0.718	228	0.267477
ENSP00000164227	BCL3	1.84e-05	0.372	347	0.942911
ENSP00000164305	PIGB	1.26e-05	1	0	0.171924
ENSP00000164640	PDZD4	1.36e-05	0.506	0	0.22158
ENSP00000165524	PRLH	6.89e-05	0.228	349	0.471197
ENSP00000166139	FSTL3	3.18e-05	0.676	252	0.794963
ENSP00000166534	P4HA2	3.72e-05	0.594	231	0.295935
ENSP00000167106	VASH1	0.000106363	0.136	160	0.161423
ENSP00000167586	KRT14	1.45e-05	0.916	349	0.894266
ENSP00000168148	SPP2	1.42e-05	0.566	0	0.244709
ENSP00000168712	FGF4	9.38e-05	0.082	866	0.989396
ENSP00000168977	NMRK2	2.64e-05	0.446	277	0.296355
ENSP00000169298	ST6GAL1	2.23e-05	0.706	235	0.745513
ENSP00000169551	TIMM21	2.02e-05	0.99	0	0.197987
ENSP00000170168	REXO1	1.51e-05	0.974	229	0.742986
ENSP00000170447	MKRN2	1.41e-05	0.994	0	0.34249
ENSP00000170564	GPATCH1	2.01e-05	0.994	0	0.409877
ENSP00000170630	IL4R	2.51e-05	0.482	873	0.717427
ENSP00000171111	KEAP1	1.46e-05	0.972	159	0.726886
ENSP00000171214	RDH8	6.1e-05	0.598	911	0
ENSP00000171757	P2RY10	3.82e-05	0.24	900	0.709014
ENSP00000172229	NGFR	3.03e-05	0.126	832	0.903534
ENSP00000173229	NTN1	9.83e-05	0.096	558	0.878155
ENSP00000173527	ISOC1	7.79e-05	0.96	0	0.363869
ENSP00000173898	TRO	3.02e-05	0.592	363	0.723385
ENSP00000174618	MNT	2.52e-05	0.528	361	0.693574
ENSP00000174653	AP3M2	2.33e-05	0.812	160	0.384709
ENSP00000175091	LAPTM4A	4.03e-05	0.976	0	0.206453
ENSP00000175506	ASNS	1.45e-05	0.99	568	0.568683
ENSP00000176183	DRD4	4.1e-05	0.104	917	0.881743
ENSP00000176763	STK10	0.000106765	0.608	241	0.318315
ENSP00000177648	ALPK1	3.32e-05	0.458	192	0.329266
ENSP00000177694	TBX21	3.97e-05	0.096	992	0.935785
ENSP00000178638	CA12	1.92e-05	0.934	241	0.277186
ENSP00000178640	MAP2K5	1.23e-05	0.566	397	0.979634
ENSP00000179259	C12orf5	4.17e-05	0.376	288	0
ENSP00000180166	FGF20	6.25e-05	0.048	748	0.967051
ENSP00000181796	FAM107B	0.000540942	0.934	0	0.5236
ENSP00000182377	FAR2	1.57e-05	0.994	0	0.205849
ENSP00000182527	TRAM2	0.00010466	0.588	626	0.306097
ENSP00000183605	CLDN18	3.25e-05	0.44	161	0.276383
ENSP00000184266	NDUFB4	1.22e-05	0.99	0	0.20913
ENSP00000184956	HEATR6	3.09e-05	0.996	0	0.805158
ENSP00000185150	ERLEC1	2.98e-05	0.648	494	0.514533
ENSP00000185206	CLIC5	2.76e-05	0.362	540	0.343124
ENSP00000186436	TMEM131	4.14e-05	0.58	198	0.138394
ENSP00000187397	ARPP21	3.95e-05	0.216	252	0.495049
ENSP00000188790	FAP	2.45e-05	0.806	526	0.124852
ENSP00000190165	DMRT3	0.000100739	0.052	603	0.728728
ENSP00000190983	WISP2	6.73e-05	0.292	187	0.449429
ENSP00000192788	UHRF1BP1	5.19e-05	0.928	225	0.451688
ENSP00000193322	OSTM1	6.37e-05	0.896	487	0.196308
ENSP00000193391	IMPG2	6.48e-05	0.174	464	0.624527
ENSP00000194118	KIAA0141	1.28e-05	0.852	373	0.610332
ENSP00000194130	SLC13A1	2.27e-05	0.596	302	0.555465
ENSP00000194152	PCDHB4	6.26e-05	0.992	0	0.387236
ENSP00000194155	PCDHB2	5.76e-05	0.998	0	0.413637
ENSP00000194214	HSPB11	4.24e-05	0.64	213	0.147499
ENSP00000194530	STRADB	7.63e-05	0.588	910	0.323743
ENSP00000195455	C4orf6	7.07e-05	0.318	204	0
ENSP00000196061	PLOD1	4.01e-05	0.26	848	0.555782
ENSP00000196371	OXCT1	1.03e-05	0.966	195	0.193657
ENSP00000196482	ZNF324	1.94e-05	0.698	246	0.997416
ENSP00000196489	ZNF416	2.21e-05	0.652	246	0.998669
ENSP00000196548	ZNF8	1.96e-05	0.71	288	0
ENSP00000197268	KIAA1467	6.82e-05	0.998	0	0
ENSP00000198536	PILRA	5.24e-05	0.298	191	0.452642
ENSP00000198765	CPNE3	4.71e-05	0.92	161	0.278979
ENSP00000198767	RRN3	3.91e-05	0.914	196	0.731644
ENSP00000198801	MOGAT2	5.78e-05	0.078	407	0.132259
ENSP00000199280	AQP2	1.25e-05	0.824	817	0.327995
ENSP00000199389	EIF2AK1	3.27e-05	0.348	307	0.549511
ENSP00000199706	MRPL28	1.17e-05	0.998	0	0.378633
ENSP00000199708	HBQ1	1.94e-05	0.904	158	0.186154
ENSP00000199764	CEACAM6	2.39e-05	0.396	197	0.466445
ENSP00000199814	RBM22	1.23e-05	0.896	243	0.554915
ENSP00000200135	ZW10	1.15e-05	0.97	187	0.609554
ENSP00000200181	ITGB4	1.93e-05	0.986	0	0.731637
ENSP00000200457	TRIP6	1.71e-05	0.996	470	0.613776
ENSP00000200557	ADAM11	3.57e-05	0.412	166	0.240349
ENSP00000200652	SLC22A4	1.72e-05	0.734	325	0.565791
ENSP00000201031	TFAP2C	6.96e-05	0.406	362	0.916231
ENSP00000201586	SULT2B1	2.43e-05	0.08	270	0.837549
ENSP00000202017	PDRG1	1.96e-05	0.988	0	0.31863
ENSP00000202556	PPP1R13B	2.71e-05	0.872	382	0.65867
ENSP00000202773	RPL6	1.05e-05	0.978	295	0.785885
ENSP00000202788	-	5.18e-05	0.964	0	0
ENSP00000202831	SLC24A6	4.82e-05	0.514	323	0
ENSP00000202967	SIRT4	2.24e-05	0.966	378	0.808182
ENSP00000203001	TRMT6	1.42e-05	0.92	204	0.717634
ENSP00000203556	GMIP	1.59e-05	0.984	0	0.31833
ENSP00000203629	LAG3	3.77e-05	0.352	264	0.608507
ENSP00000203630	MLF2	3.49e-05	0.668	538	0.231984
ENSP00000203664	OTUB2	5.32e-05	0.564	251	0.205529
ENSP00000204517	TFAP4	4.48e-05	0.938	329	0.845283
ENSP00000204549	PDCD7	0.000128904	0.954	0	0.313111
ENSP00000204604	CHRD	9.27e-05	0.018	928	0.974569
ENSP00000204615	THPO	3.81e-05	0.102	910	0.849807
ENSP00000204726	GOLGA3	8.81e-05	0.96	0	0.20832
ENSP00000204961	EFNB1	3.1e-05	0.224	920	0.883582
ENSP00000205061	GLG1	6.12e-05	0.294	298	0.330008
ENSP00000205143	DLL3	0.000114567	0.024	537	0.861765
ENSP00000205194	NAT14	0.000124584	0.732	329	0.389881
ENSP00000205214	AASDH	1.64e-05	0.886	241	0.492896
ENSP00000205557	ABCC6	1.2e-05	0.984	309	0.375467
ENSP00000205636	CMTM6	0.000167474	0.574	418	0.459812
ENSP00000206020	SPAG7	4.05e-05	0.992	0	0.269072
ENSP00000206249	ESR1	1.61e-05	0.214	965	0
ENSP00000206262	RGS17	4.9e-05	0.37	304	0.386058
ENSP00000206380	TMEM101	6.13e-05	0.906	0	0.322754
ENSP00000206423	CCDC80	4e-05	0.302	199	0.229837
ENSP00000206474	HAUS4	0.000121842	0.69	173	0.361842
ENSP00000206513	CEBPE	0.000128019	0.06	384	0.859548
ENSP00000206542	OSGEP	1.79e-05	0.802	281	0.453198
ENSP00000206544	SLC22A17	8.66e-05	0.636	172	0.293292
ENSP00000206595	G2E3	1.07e-05	0.99	0	0.296699
ENSP00000206765	TGM1	2.14e-05	0.658	213	0.67133
ENSP00000207157	TBX15	0.000156394	0.026	470	0.902663
ENSP00000207437	MYL6B	1.29e-05	0.952	290	0
ENSP00000207457	TEKT2	5.59e-05	0.138	284	0.290112
ENSP00000207549	UNC13D	1.14e-05	0.998	0	0.375014
ENSP00000209668	ADH1A	1.26e-05	0.732	944	0.2633
ENSP00000209718	KRT23	2.92e-05	0.514	167	0.439558
ENSP00000209728	CDC6	1.28e-05	0.72	255	0.760203
ENSP00000209873	AAAS	2.34e-05	0.952	150	0.359124
ENSP00000209875	CBX5	1.66e-05	0.88	206	0.912206
ENSP00000209884	KLHL20	2.96e-05	0.806	152	0.826801
ENSP00000209929	FMO2	1.97e-05	0.644	231	0.311768
ENSP00000210060	DHPS	1.86e-05	0.608	284	0.424034
ENSP00000210187	RAB26	2.58e-05	0.882	161	0.264548
ENSP00000210313	PSMD5	4.28e-05	0.838	431	0.468668
ENSP00000210444	NANS	1.63e-05	0.926	491	0.461565
ENSP00000210633	SEMA4G	7.88e-05	0.134	251	0.377896
ENSP00000211122	GSTA3	2.52e-05	0.514	341	0.250969
ENSP00000211314	TMEM14A	0.000188771	0.866	0	0.473767
ENSP00000211413	PRRT1	4.26e-05	0.308	151	0.375262
ENSP00000211936	ZNF184	2.12e-05	0.444	246	0.989637
ENSP00000212015	SIRT1	1.15e-05	0.864	972	0.91128
ENSP00000212355	TGFBR3	3.95e-05	0.812	169	0.709561
ENSP00000214869	TMED1	1.95e-05	0.992	0	0.261866
ENSP00000215057	MZF1	2.22e-05	0.276	613	0.965348
ENSP00000215061	OCEL1	5.12e-05	0.276	167	0.363436
ENSP00000215368	EFNA2	5.07e-05	0.092	889	0.820419
ENSP00000215376	C19orf26	0.000102849	0.094	468	0
ENSP00000215479	AMELY	3.48e-05	0.38	197	0.268564
ENSP00000215530	FGF22	7.76e-05	0.054	695	0.934038
ENSP00000215531	C19orf77	0.000206522	1	0	0
ENSP00000215555	2021-03-02	3.95e-05	0.66	378	0.545399
ENSP00000215567	TECR	1.54e-05	0.79	452	0.376236
ENSP00000215570	TIMM13	1.58e-05	0.982	0	0.616842
ENSP00000215582	C19orf21	2.99e-05	0.998	0	0
ENSP00000215591	POLRMT	1.6e-05	0.948	212	0
ENSP00000215631	GADD45B	1.77e-05	0.928	159	0.860078
ENSP00000215637	MADCAM1	1.35e-05	0.722	195	0.680344
ENSP00000215727	SERPIND1	1.57e-05	0.68	156	0.256348
ENSP00000215739	LZTR1	3.69e-05	0.764	384	0.520566
ENSP00000215742	THAP7	1.95e-05	0.904	0	0.327022
ENSP00000215743	MMP11	1.53e-05	0.714	166	0.769962
ENSP00000215754	MIF	2.38e-05	0.614	269	0.800591
ENSP00000215770	DDTL	3.58e-05	0.996	0	0.218477
ENSP00000215773	DDT	2.78e-05	0.75	194	0.844862
ENSP00000215780	GSTT2	1.18e-05	0.92	225	0
ENSP00000215781	OSM	1.48e-05	0.708	196	0.780874
ENSP00000215794	USP18	1.08e-05	0.986	165	0.275123
ENSP00000215812	SEC14L3	2.85e-05	0.608	482	0.315127
ENSP00000215829	SNRPD3	1.15e-05	0.994	158	0.686248
ENSP00000215855	CRYBB3	3.37e-05	0.434	235	0.29946
ENSP00000215862	MORC2	1.62e-05	0.986	0	0.3263
ENSP00000215904	PDXP	1.97e-05	0.42	412	0.621606
ENSP00000215909	LGALS1	1.62e-05	0.802	191	0.770741
ENSP00000215912	PIK3IP1	2.85e-05	0.504	216	0.451557
ENSP00000215917	SRRD	5.18e-05	0.312	159	0.250153
ENSP00000215939	CRYBB1	8.25e-05	0.168	216	0.424217
ENSP00000215941	ANKRD54	2.11e-05	0.56	202	0.799133
ENSP00000215957	MICALL1	1.12e-05	0.988	316	0.208235
ENSP00000216034	TOMM22	2.41e-05	0.988	0	0.250087
ENSP00000216036	RTDR1	1.62e-05	0.968	209	0
ENSP00000216037	XBP1	2.83e-05	0.748	634	0.843855
ENSP00000216038	C22orf28	1.13e-05	0.994	0	0
ENSP00000216039	JOSD1	4.53e-05	0.982	0	0.274251
ENSP00000216044	GTPBP1	2.37e-05	0.786	216	0.154442
ENSP00000216068	DNAL4	3.03e-05	0.31	414	0.478373
ENSP00000216075	MIOX	7.81e-05	0.162	179	0.190082
ENSP00000216085	RHBDD3	1.34e-05	0.994	0	0.232511
ENSP00000216099	APOBEC3D	2.53e-05	0.996	0	0.161173
ENSP00000216115	BIK	2.21e-05	0.99	0	0.310145
ENSP00000216117	HMOX1	1.83e-05	0.578	865	0.870601
ENSP00000216121	NIPSNAP1	1.11e-05	0.994	0	0.243242
ENSP00000216129	TTLL12	1.84e-05	0.996	0	0.32413
ENSP00000216139	ACR	1.34e-05	0.65	181	0.255097
ENSP00000216144	CABP7	1.21e-05	0.798	508	0
ENSP00000216160	TAB1	1.23e-05	0.982	643	0.812681
ENSP00000216187	FOXRED2	5.13e-05	0.582	188	0.329477
ENSP00000216194	ADSL	2.27e-05	0.56	414	0.518962
ENSP00000216200	PVALB	2.03e-05	0.13	822	0.976786
ENSP00000216214	FAM118A	3.1e-05	0.99	0	0.264164
ENSP00000216218	ST13	5.81e-05	0.866	151	0.216644
ENSP00000216223	IL2RB	1.32e-05	0.868	478	0.765834
ENSP00000216225	RBX1	1.07e-05	0.998	602	0.685125
ENSP00000216237	L3MBTL2	1.2e-05	0.97	0	0.699608
ENSP00000216252	PHF5A	1.32e-05	0.84	339	0.549985
ENSP00000216264	CERK	3.82e-05	0.516	308	0.253723
ENSP00000216267	BRD1	1.23e-05	0.754	350	0
ENSP00000216274	RIPK3	1.03e-05	0.934	187	0.993929
ENSP00000216277	PAPOLA	1.79e-05	0.986	170	0.732665
ENSP00000216294	SNAPC1	4.57e-05	0.73	384	0.539872
ENSP00000216297	SUPT16H	1.09e-05	0.986	396	0.791474
ENSP00000216336	CTSG	2.25e-05	0.176	286	0.770781
ENSP00000216361	COCH	6.14e-05	0.194	194	0.247474
ENSP00000216366	AP4S1	4.05e-05	0.466	543	0.366639
ENSP00000216392	PYGL	1.2e-05	0.934	239	0.267711
ENSP00000216410	GNPNAT1	1.16e-05	0.964	177	0.188996
ENSP00000216416	CNIH	1.39e-05	0.736	413	0
ENSP00000216420	CGRRF1	5.46e-05	0.996	0	0.457944
ENSP00000216445	C14orf105	1.22e-05	0.706	0	0.466004
ENSP00000216446	PLEK2	5.3e-05	0.992	0	0.343442
ENSP00000216452	PIGH	2.22e-05	0.996	0	0.195234
ENSP00000216468	TMED8	2.7e-05	0.53	158	0.40096
ENSP00000216471	SAMD15	2.93e-05	0.33	0	0.685845
ENSP00000216479	AHSA1	2.17e-05	0.764	207	0.321361
ENSP00000216484	SPTLC2	1.35e-05	0.888	226	0.403938
ENSP00000216489	ALKBH1	2.11e-05	0.962	416	0.14545
ENSP00000216492	CHGA	3.73e-05	0.186	824	0.862651
ENSP00000216513	SIX4	0.000152381	0.066	677	0.945964
ENSP00000216554	EIF5	1.65e-05	0.986	171	0.769172
ENSP00000216602	ZFYVE21	4.28e-05	1	0	0.311557
ENSP00000216629	BDKRB1	4.9e-05	0.052	908	0.920324
ENSP00000216639	VRK1	1.07e-05	0.912	202	0
ENSP00000216727	PABPN1	2.45e-05	0.784	710	0.703281
ENSP00000216733	EFS	6.31e-05	0.536	167	0.393389
ENSP00000216774	SRP54	1.14e-05	0.92	271	0.748083
ENSP00000216775	CPNE6	0.000139162	0.052	288	0
ENSP00000216780	PCK2	2.68e-05	0.284	457	0.750925
ENSP00000216797	NFKBIA	1.6e-05	0.514	567	0.900588
ENSP00000216799	EMC9	2.84e-05	0.546	175	0.291937
ENSP00000216802	PSME2	1.31e-05	0.972	158	0.351874
ENSP00000216807	BRMS1L	5.91e-05	0.36	242	0.829527
ENSP00000216832	PNN	1.63e-05	0.994	0	0.525114
ENSP00000216840	RABGGTA	7.68e-05	0.264	414	0.191211
ENSP00000216862	CYP24A1	2.76e-05	0.434	423	0.645104
ENSP00000216923	ZFP64	1.92e-05	0.412	334	0.971026
ENSP00000216951	GSS	1.37e-05	0.958	216	0.255514
ENSP00000216962	PYGB	1.34e-05	0.904	313	0.223174
ENSP00000216968	PROCR	4.4e-05	0.71	167	0.213022
ENSP00000217026	MYBL2	1.18e-05	0.602	883	0
ENSP00000217073	PABPC1L	1.06e-05	0.974	477	0.754556
ENSP00000217086	SALL4	0.000152269	0.156	915	0.966747
ENSP00000217121	TPD52L2	1.73e-05	0.994	0	0.211971
ENSP00000217130	ZNF512B	2.37e-05	0.214	246	0.979654
ENSP00000217131	CTSZ	3.04e-05	0.52	210	0.203005
ENSP00000217159	SLCO4A1	2.53e-05	0.836	279	0.391865
ENSP00000217169	BIRC7	1.1e-05	0.996	0	0.485928
ENSP00000217173	UBOX5	1.68e-05	0.922	243	0.475005
ENSP00000217182	EEF1A2	1.05e-05	0.826	432	0.695093
ENSP00000217188	SRMS	1.15e-05	0.866	182	0.996686
ENSP00000217195	C20orf27	0.000113512	0.564	159	0.40134
ENSP00000217233	TRIB3	1.79e-05	0.442	402	0.987701
ENSP00000217246	MACROD2	3.89e-05	0.714	343	0.65728
ENSP00000217254	SLC52A3	1.04e-05	0.534	0	0.204186
ENSP00000217270	PROKR2	8.25e-05	0.036	902	0.812085
ENSP00000217289	FERMT1	4.82e-05	0.302	220	0.231129
ENSP00000217299	XKR7	4.52e-05	0.438	159	0
ENSP00000217305	PDYN	3.32e-05	0.158	974	0.875236
ENSP00000217320	TLDC2	0.000325677	0.162	156	0.53129
ENSP00000217372	CDK5RAP1	1.32e-05	0.928	317	0.607411
ENSP00000217381	SNTA1	1.78e-05	0.588	163	0.459821
ENSP00000217386	OXT	2.76e-05	0.11	994	0.909107
ENSP00000217402	CHMP4B	1.64e-05	0.636	270	0
ENSP00000217423	CST4	1.15e-05	0.996	0	0.242825
ENSP00000217429	FAM83D	3.43e-05	0.796	594	0.526737
ENSP00000217446	PIGU	1.12e-05	0.99	0	0.160508
ENSP00000217455	ACOT8	1.44e-05	0.772	459	0.512742
ENSP00000217456	APMAP	1.27e-05	0.994	0	0.171208
ENSP00000217515	TXNL1	2.2e-05	0.812	615	0.265794
ENSP00000217740	RNF125	1.21e-05	0.994	0	0.245084
ENSP00000217893	TAF9	2.05e-05	0.616	501	0.890455
ENSP00000217901	IDH3G	1.15e-05	0.762	496	0.454905
ENSP00000217909	SLC25A43	8.94e-05	0.894	0	0.287147
ENSP00000217958	PSMD10	1.86e-05	0.586	201	0.735133
ENSP00000217961	STS	1.15e-05	0.682	284	0.715492
ENSP00000217964	TBL1X	1.91e-05	0.836	229	0.885291
ENSP00000217999	RHOXF1	5.68e-05	0.104	387	0.931068
ENSP00000218004	NXT2	9.89e-05	0.884	329	0.412948
ENSP00000218006	GUCY2F	1.59e-05	0.43	353	0.990435
ENSP00000218008	ATP1B4	3.56e-05	0.482	159	0.126102
ENSP00000218075	GLRA2	5.86e-05	0.08	638	0.555083
ENSP00000218104	ABCD1	2.37e-05	0.568	157	0.144239
ENSP00000218147	BCORL1	5.74e-05	0.738	365	0.511632
ENSP00000218176	KCND1	1.84e-05	0.642	195	0.368457
ENSP00000218224	PQBP1	4.72e-05	0.278	191	0.450497
ENSP00000218230	PCSK1N	1.64e-05	0.394	0	0.490948
ENSP00000218249	RAB40AL	1.41e-05	0.766	758	0.653699
ENSP00000218316	GPR50	3.79e-05	0.154	221	0.747304
ENSP00000218340	RP2	1.87e-05	0.994	0	0.318307
ENSP00000218343	PHF16	4.19e-05	0.934	180	0
ENSP00000218364	HTATSF1	1.19e-05	0.976	165	0.553949
ENSP00000218388	TIMP1	2.85e-05	0.25	252	0.888929
ENSP00000218436	ITIH6	1.75e-05	0.646	276	0.528079
ENSP00000218439	MAGED2	4.95e-05	0.322	661	0.409326
ENSP00000218516	GLA	8.17e-05	0.164	402	0.219518
ENSP00000218548	ATP12A	1.43e-05	0.734	583	0.677488
ENSP00000218652	NDFIP2	2.63e-05	0.974	0	0.159776
ENSP00000218721	MLNR	4.56e-05	0.182	928	0.776351
ENSP00000218758	ACP5	1.88e-05	0.812	235	0.806127
ENSP00000218867	SGCG	1.11e-05	0.706	390	0.602404
ENSP00000218894	SUPT20H	5.84e-05	0.224	206	0.619574
ENSP00000219066	NTHL1	1.07e-05	0.97	282	0.682078
ENSP00000219069	ZNF263	2.28e-05	0.368	401	0.981863
ENSP00000219070	MMP2	3.43e-05	0.148	839	0.897518
ENSP00000219091	ZNF205	1.72e-05	0.71	246	0.988099
ENSP00000219097	ORC6	2.84e-05	0.776	489	0.449582
ENSP00000219139	C16orf70	9.48e-05	0.666	199	0.367971
ENSP00000219162	MT4	1.03e-05	0.936	0	0.286482
ENSP00000219168	LYRM1	1.02e-05	0.956	0	0.277002
ENSP00000219169	NUTF2	2.54e-05	0.978	561	0.557149
ENSP00000219172	CENPT	1.37e-05	0.99	0	0
ENSP00000219197	CBLN1	5.85e-05	0.166	544	0.360995
ENSP00000219204	ARL2BP	0.000179461	0.946	0	0.451308
ENSP00000219207	PLLP	0.000118593	0.068	372	0.244669
ENSP00000219235	CCL22	6.18e-05	0.13	438	0.649975
ENSP00000219240	DHODH	1.96e-05	0.408	771	0.752513
ENSP00000219244	CCL17	5.5e-05	0.13	439	0.643685
ENSP00000219271	MMP15	4.71e-05	0.468	817	0.71739
ENSP00000219281	USB1	0.000157855	0.864	0	0.280383
ENSP00000219299	CCDC113	0.000183073	0.154	243	0.413787
ENSP00000219301	PRSS54	1.53e-05	0.408	0	0.456279
ENSP00000219302	NME3	1.05e-05	0.924	340	0.690927
ENSP00000219315	SETD6	0.000123039	0.632	242	0.37011
ENSP00000219320	SLC38A7	1.14e-05	0.704	654	0.353884
ENSP00000219343	SLC7A6	1.49e-05	0.93	345	0.743734
ENSP00000219368	FA2H	1.19e-05	0.936	310	0.337664
ENSP00000219400	CMC2	2.02e-05	0.996	0	0.396648
ENSP00000219431	MPG	2.33e-05	0.74	235	0.219177
ENSP00000219439	HSDL1	2.68e-05	0.874	197	0.238749
ENSP00000219476	TSC2	2.24e-05	0.742	980	0.839843
ENSP00000219478	ZNF500	1.9e-05	0.568	246	0.992013
ENSP00000219481	DECR2	1.14e-05	0.99	169	0.216907
ENSP00000219548	STUB1	1.2e-05	0.89	256	0.853885
ENSP00000219551	RHBDL1	3.96e-05	0.058	216	0.37578
ENSP00000219593	ZP2	8.18e-05	0.056	560	0
ENSP00000219599	CRYM	3.78e-05	0.194	212	0.127519
ENSP00000219611	SOLH	1.64e-05	0.708	266	0
ENSP00000219700	HMOX2	2.92e-05	0.142	664	0.860603
ENSP00000219782	MAZ	2.06e-05	0.312	380	0.953022
ENSP00000219789	CDIPT	1.11e-05	0.868	403	0.323581
ENSP00000219833	SLC6A2	5.93e-05	0.06	622	0.537684
ENSP00000219837	KNOP1	2.94e-05	0.99	0	0.528137
ENSP00000219905	MGA	0.000153657	0.072	427	0.950428
ENSP00000220003	CSK	1.15e-05	0.934	570	0.980464
ENSP00000220058	MTFMT	3.47e-05	0.32	629	0.595761
ENSP00000220325	EHD4	2.53e-05	0.896	175	0.248538
ENSP00000220420	TGM5	2.37e-05	0.994	0	0.163876
ENSP00000220429	GABPB1	2.42e-05	0.55	201	0.889369
ENSP00000220478	SCG3	5.56e-05	0.234	196	0.284743
ENSP00000220496	DNAJC17	1.88e-05	0.844	282	0.434265
ENSP00000220509	VPS18	1.19e-05	0.964	165	0.471371
ENSP00000220514	OIP5	2.15e-05	0.894	235	0.454077
ENSP00000220531	BLOC1S6	4.16e-05	0.922	0	0.28463
ENSP00000220562	EXTL3	1.43e-05	0.522	408	0.586993
ENSP00000220592	AGO2	1.11e-05	0.938	258	0.84514
ENSP00000220616	TG	2.87e-05	0.134	649	0.810774
ENSP00000220659	BRF2	1.46e-05	0.74	196	0
ENSP00000220669	ZFAND1	4.05e-05	0.972	0	0.233944
ENSP00000220676	RP1	8.26e-05	0.03	290	0.606591
ENSP00000220763	CPQ	3.79e-05	0.716	161	0.166522
ENSP00000220764	DECR1	1e-05	0.726	412	0.781148
ENSP00000220772	SFRP1	5.9e-05	0.04	940	0.984741
ENSP00000220809	PLAT	2.28e-05	0.372	210	0.696369
ENSP00000220812	DKK4	7.39e-05	0.168	452	0.730428
ENSP00000220822	GDAP1	4.31e-05	0.568	582	0.111048
ENSP00000220853	EMC2	1.81e-05	0.998	0	0.260938
ENSP00000220913	CHRAC1	1.99e-05	0.8	358	0
ENSP00000220931	NCALD	1.21e-05	0.888	290	0.432306
ENSP00000220966	PYCRL	2.36e-05	0.47	260	0.370793
ENSP00000221086	MTMR9	4.13e-05	0.978	0	0.153757
ENSP00000221114	DCTN6	2.28e-05	0.878	181	0.257054
ENSP00000221130	GSR	1.41e-05	0.82	567	0.44067
ENSP00000221132	TNFRSF10A	1.68e-05	0.962	163	0.78929
ENSP00000221167	-	2.31e-05	0.648	160	0
ENSP00000221200	KCTD9	7.11e-05	0.868	416	0.312606
ENSP00000221232	CNOT3	1.39e-05	0.82	152	0.545601
ENSP00000221233	EXOSC5	1.14e-05	0.994	0	0.685782
ENSP00000221265	PAF1	2.38e-05	0.488	574	0.544391
ENSP00000221283	STXBP2	1.17e-05	0.958	484	0.520434
ENSP00000221307	CYP4F3	3.24e-05	0.48	383	0.474971
ENSP00000221315	ZNF432	2.09e-05	0.632	246	0.993498
ENSP00000221327	ZNF180	2.3e-05	0.616	246	0.998226
ENSP00000221399	TULP2	8.26e-05	0.572	255	0.46905
ENSP00000221403	DHDH	1.39e-05	0.674	207	0
ENSP00000221418	ECH1	1.37e-05	0.94	159	0.166832
ENSP00000221419	HNRNPL	2.37e-05	0.978	242	0.718489
ENSP00000221421	LHB	4.82e-05	0.114	475	0.784261
ENSP00000221444	KCNA7	2e-05	0.552	903	0.284938
ENSP00000221452	RELB	2.27e-05	0.6	802	0.938769
ENSP00000221455	CLASRP	2.96e-05	0.266	197	0.251068
ENSP00000221459	LIN7B	3.69e-05	0.29	448	0.169182
ENSP00000221476	CKM	2.3e-05	0.914	924	0.514369
ENSP00000221480	PEX11G	1.3e-05	0.996	0	0.138236
ENSP00000221485	SLC17A7	7.26e-05	0.024	750	0.672088
ENSP00000221494	SF3A2	1.75e-05	0.96	175	0.67248
ENSP00000221496	AMH	5.46e-05	0.058	486	0.966986
ENSP00000221515	RETN	3.87e-05	0.592	349	0.802508
ENSP00000221538	RSPH6A	4.36e-05	0.218	413	0.293828
ENSP00000221543	TBC1D17	1.65e-05	0.962	282	0.453601
ENSP00000221561	AES	4.96e-05	0.206	911	0.947327
ENSP00000221566	SGTA	1.2e-05	0.606	236	0.682639
ENSP00000221573	SNAPC2	1.67e-05	0.408	0	0.541394
ENSP00000221665	FIZ1	3.04e-05	0.208	398	0.990009
ENSP00000221671	C19orf44	0.00282436	0.998	0	0.674309
ENSP00000221700	CYP4F2	3.68e-05	0.418	341	0.477475
ENSP00000221722	ZIM2	1.93e-05	0.698	246	0
ENSP00000221730	EPHX3	1.04e-05	0.66	0	0.431053
ENSP00000221740	CASP14	3.16e-05	0.88	555	0
ENSP00000221742	SLC1A6	2.94e-05	0.248	565	0.458346
ENSP00000221804	CLC	3.37e-05	0.386	197	0.158282
ENSP00000221855	TBCB	4.19e-05	0.952	181	0.209584
ENSP00000221856	FSD1	6.31e-05	0.67	193	0.315462
ENSP00000221891	APLP1	2.56e-05	0.428	271	0.589453
ENSP00000221922	CCDC9	2.59e-05	0.994	0	0.329391
ENSP00000221930	TGFB1	2.45e-05	0.16	909	0
ENSP00000221957	PLIN3	6.3e-05	0.48	211	0.181142
ENSP00000221972	CD79A	1.14e-05	0.66	937	0.811627
ENSP00000221973	LIM2	3.62e-05	0.274	414	0.274984
ENSP00000221978	NKG7	1.39e-05	0.57	0	0.279576
ENSP00000221980	ICAM5	2.87e-05	0.412	347	0.515748
ENSP00000221996	CRX	9.69e-05	0.03	827	0.971526
ENSP00000222002	SULT2A1	2.15e-05	0.414	298	0.509085
ENSP00000222005	CDC37	0.000245847	0.994	234	0.75273
ENSP00000222008	RABAC1	2.13e-05	0.83	475	0.45044
ENSP00000222032	CNFN	4.91e-05	0.296	150	0.325571
ENSP00000222033	ZNRF4	7.53e-05	0.304	159	0.331564
ENSP00000222120	RAB3D	1.66e-05	0.882	356	0.372948
ENSP00000222122	DBP	1.31e-05	0.56	0	0.637738
ENSP00000222125	CAPS	1.01e-05	0.77	154	0.98411
ENSP00000222139	EPOR	2.38e-05	0.762	583	0.829348
ENSP00000222145	RASIP1	2.03e-05	0.328	324	0.468591
ENSP00000222157	FGF21	4.89e-05	0.304	717	0.892007
ENSP00000222212	CACNG7	2.13e-05	0.432	360	0.284774
ENSP00000222219	DNASE2	2.14e-05	0.706	266	0.486571
ENSP00000222224	LENG1	1.7e-05	0.582	0	0.513247
ENSP00000222248	SLC5A5	1.57e-05	0.44	330	0.406878
ENSP00000222250	ARRDC2	1.97e-05	0.788	228	0.203602
ENSP00000222254	PIK3R2	1.98e-05	0.91	197	0.731407
ENSP00000222256	RAB3A	1.47e-05	0.668	916	0.376672
ENSP00000222266	PSENEN	1.7e-05	0.832	360	0.617239
ENSP00000222270	WBP7	3.39e-05	0.14	673	0
ENSP00000222271	COMP	2.31e-05	0.256	313	0.606356
ENSP00000222284	TMEM147	1.54e-05	0.994	0	0.310756
ENSP00000222304	HAMP	2.05e-05	0.52	165	0.659927
ENSP00000222305	USF2	3.74e-05	0.32	896	0.931079
ENSP00000222307	KXD1	1.51e-05	0.994	0	0.215352
ENSP00000222308	FKBP8	1.38e-05	0.776	659	0.621065
ENSP00000222329	ERF	4.05e-05	0.746	155	0.844838
ENSP00000222330	GSK3A	1.65e-05	0.222	726	0.972608
ENSP00000222345	SIPA1L3	5.75e-05	0.91	392	0.285512
ENSP00000222374	CADM4	2.56e-05	1	0	0.319835
ENSP00000222381	PON1	1.12e-05	0.786	407	0.580442
ENSP00000222382	CYP3A43	1.68e-05	0.702	337	0.516262
ENSP00000222388	ABCF2	1.41e-05	0.904	472	0.577463
ENSP00000222390	HGF	2.04e-05	0.36	326	0.863864
ENSP00000222399	LAMB1	4.36e-05	0.316	284	0.651914
ENSP00000222402	UBE2D4	1.22e-05	0.88	356	0.475724
ENSP00000222462	WNT16	6.76e-05	0.048	906	0.992977
ENSP00000222481	CPA2	1.83e-05	0.612	167	0.216982
ENSP00000222482	CPA4	1.6e-05	0.926	156	0.182621
ENSP00000222543	TFPI2	3.37e-05	0.186	242	0.593268
ENSP00000222553	NAMPT	2.59e-05	0.856	351	0.64237
ENSP00000222567	TWISTNB	1.63e-05	0.942	266	0.684429
ENSP00000222572	PON2	4.1e-05	0.704	159	0.33325
ENSP00000222573	ITGB8	3.77e-05	0.416	150	0.561046
ENSP00000222574	HBP1	3.35e-05	0.994	0	0.574987
ENSP00000222584	SP4	2.25e-05	0.352	327	0.962998
ENSP00000222598	DLX5	0.000125604	0.06	859	0.985288
ENSP00000222644	MPP6	1.06e-05	0.956	549	0.451415
ENSP00000222674	NPVF	1.45e-05	0.394	0	0.378121
ENSP00000222693	CAV2	2.09e-05	0.86	167	0.716536
ENSP00000222718	HOXA2	0.000216673	0.016	817	0.978999
ENSP00000222725	LFNG	9.55e-05	0.046	584	0.927809
ENSP00000222726	HOXA5	0.000114146	0.138	950	0.981125
ENSP00000222728	HOXA6	0.000207257	0.064	502	0.968806
ENSP00000222753	HOXA13	0.000218979	0.074	903	0.978061
ENSP00000222792	CHN2	1.32e-05	0.654	177	0.500812
ENSP00000222803	FKBP14	1.25e-05	0.962	205	0.379458
ENSP00000222812	STX1A	1.24e-05	0.87	567	0.468694
ENSP00000222823	NOD1	1.39e-05	0.88	256	0.660035
ENSP00000222902	CCL24	0.000164444	0.284	0	0.499124
ENSP00000222968	PDAP1	5.48e-05	0.814	202	0.291946
ENSP00000222982	CYP3A5	1.46e-05	0.7	932	0.568937
ENSP00000222990	SNX8	1.3e-05	0.952	238	0.375516
ENSP00000223023	WASL	1.27e-05	0.964	358	0.611785
ENSP00000223026	HYAL4	8.23e-05	0.216	194	0.205624
ENSP00000223029	AIMP2	2.01e-05	0.914	999	0.439666
ENSP00000223051	TFR2	1.48e-05	0.994	391	0.410291
ENSP00000223054	MOSPD3	1.2e-05	0.988	473	0.16863
ENSP00000223061	PCOLCE	4.54e-05	0.27	386	0.624688
ENSP00000223095	SERPINE1	1.53e-05	0.758	284	0.897114
ENSP00000223114	MOGAT3	1.35e-05	0.996	0	0.120799
ENSP00000223122	C1GALT1	1.07e-05	0.946	230	0.569628
ENSP00000223127	PLOD3	3.66e-05	0.59	491	0.352513
ENSP00000223136	FIS1	2.86e-05	0.6	198	0.181513
ENSP00000223145	GLCCI1	2.56e-05	0.55	150	0.327336
ENSP00000223190	NRF1	2.84e-05	0.984	240	0.80517
ENSP00000223210	ZNF862	1.62e-05	0.734	246	0.988322
ENSP00000223215	MEST	2.24e-05	0.42	214	0.312495
ENSP00000223271	RARRES2	3.75e-05	0.406	0	0.404913
ENSP00000223273	YAE1D1	1.09e-05	0.98	0	0.532273
ENSP00000223336	COA1	0.000109405	0.994	0	0.4695
ENSP00000223364	MYL7	2.62e-05	0.132	519	0.538151
ENSP00000223366	GCK	1.19e-05	0.758	981	0.959996
ENSP00000223368	BCL7B	2.69e-05	0.476	158	0.349979
ENSP00000223398	CLIP2	2.06e-05	0.606	266	0.542158
ENSP00000223428	ZNF510	2.16e-05	0.684	246	0.99751
ENSP00000223459	ZNF688	2.84e-05	0.388	246	0.998582
ENSP00000223500	CHMP5	1.31e-05	0.77	198	0
ENSP00000223528	FKTN	2.3e-05	0.478	242	0.182595
ENSP00000223642	C5	6.53e-05	0.234	900	0.911324
ENSP00000223795	TNFSF8	5.95e-05	0.34	150	0.450783
ENSP00000223862	RLN1	2.71e-05	0.452	171	0.337928
ENSP00000223864	PLGRKT	8.14e-05	0.262	150	0.30252
ENSP00000224073	EDF1	1.48e-05	0.948	185	0.518396
ENSP00000224237	VIM	1.89e-05	0.238	568	0.816709
ENSP00000224337	BLNK	1.73e-05	0.626	584	0.612659
ENSP00000224600	RBP3	0.00023002	0.132	237	0
ENSP00000224605	GDF10	0.0001	0.024	375	0
ENSP00000224652	ATE1	3.35e-05	0.822	222	0.234197
ENSP00000224764	-	5.57e-05	0.106	962	0
ENSP00000224807	SFXN3	7.56e-05	0.97	0	0.22205
ENSP00000224862	FBXL15	3.09e-05	0.884	153	0.193698
ENSP00000225171	DNAJC12	1.33e-05	0.948	198	0.236971
ENSP00000225235	TBC1D12	1.03e-05	0.834	206	0.368983
ENSP00000225245	CCL3	1.27e-05	0.746	392	0
ENSP00000225275	MPO	2.96e-05	0.518	156	0.146256
ENSP00000225276	ST6GALNAC2	3.17e-05	0.468	205	0.761742
ENSP00000225296	DHX33	1.88e-05	0.982	192	0.73738
ENSP00000225328	P2RX5	3.39e-05	0.998	0	0.259479
ENSP00000225371	EPX	1.08e-05	0.826	271	0.562698
ENSP00000225387	CRYBA1	3.24e-05	0.336	239	0.651674
ENSP00000225388	NUFIP2	5.9e-05	0.968	0	0.377119
ENSP00000225396	TADA2A	1.16e-05	0.72	837	0
ENSP00000225410	ZNHIT3	5.26e-05	0.194	462	0
ENSP00000225428	CWC25	1.18e-05	0.824	172	0
ENSP00000225430	RPL19	1.42e-05	0.99	235	0.747541
ENSP00000225474	CSF3	1.6e-05	0.468	300	0.807207
ENSP00000225519	SHPK	1.64e-05	0.766	581	0.268697
ENSP00000225525	TAX1BP3	1.92e-05	0.988	0	0.205557
ENSP00000225538	P2RX1	4.59e-05	0.128	323	0.597237
ENSP00000225573	PNPO	4.25e-05	0.976	0	0.206476
ENSP00000225576	TVP23C	2.81e-05	0.882	317	0.261591
ENSP00000225577	RPS6KB1	1.1e-05	0.816	537	0
ENSP00000225603	CBX1	2.25e-05	0.804	576	0.877182
ENSP00000225614	GALK1	2.58e-05	0.244	418	0.303075
ENSP00000225648	HOXB6	0.000148454	0.012	453	0.96888
ENSP00000225655	PFN1	1.23e-05	0.994	354	0.504524
ENSP00000225665	SLC25A11	1.03e-05	0.99	0	0.194019
ENSP00000225698	C1QBP	1.34e-05	0.616	223	0.793137
ENSP00000225719	CPD	0.00010051	0.958	0	0.226564
ENSP00000225726	CCDC47	8.27e-05	0.3	221	0.28899
ENSP00000225728	MED31	1.05e-05	0.978	216	0.88506
ENSP00000225729	DRG2	2e-05	0.874	188	0.49916
ENSP00000225777	SYNGR2	2.55e-05	0.994	0	0.316837
ENSP00000225792	DDX5	1.37e-05	0.882	813	0.723663
ENSP00000225805	C17orf75	1.03e-05	0.96	0	0.409736
ENSP00000225831	CCL2	2.39e-05	0.21	797	0.846444
ENSP00000225842	CCL1	0.000113143	0.362	239	0.396159
ENSP00000225844	CCL13	3.72e-05	0.396	366	0.597144
ENSP00000225873	PEX12	2.09e-05	0.628	175	0.230604
ENSP00000225893	HNF1B	4.68e-05	0.06	974	0
ENSP00000225899	KRT32	5.14e-05	0.278	178	0.381127
ENSP00000225927	NAGLU	1.6e-05	0.992	0	0.148092
ENSP00000225964	COL1A1	3.85e-05	0.198	900	0.927355
ENSP00000225969	MRPL27	1.28e-05	0.868	201	0.636843
ENSP00000225972	LRRC59	1.75e-05	0.99	0	0.423274
ENSP00000225983	HDAC5	1.28e-05	0.866	967	0
ENSP00000225992	PPY	8.54e-05	0.024	990	0.846282
ENSP00000226004	DUSP3	1.39e-05	0.982	243	0.796348
ENSP00000226067	HLF	5.78e-05	0.134	242	0.793802
ENSP00000226091	EFNB3	2.67e-05	0.314	913	0.669458
ENSP00000226105	RANGRF	2.57e-05	0.996	0	0.157192
ENSP00000226193	RCVRN	4.61e-05	0.058	539	0.574874
ENSP00000226218	SEBOX	2.67e-05	0.134	325	0
ENSP00000226225	TNFAIP1	2.63e-05	0.624	199	0.246842
ENSP00000226230	TMEM97	3.42e-05	0.478	183	0.292585
ENSP00000226247	FOXN1	2.3e-05	0.132	446	0
ENSP00000226253	ALDOC	1.37e-05	0.906	294	0.19673
ENSP00000226279	CD38	1.06e-05	0.74	470	0.736782
ENSP00000226284	IBSP	5.26e-05	0.106	455	0.926508
ENSP00000226299	LAP3	1.18e-05	0.896	800	0.379871
ENSP00000226317	CXCL6	3.88e-05	0.17	938	0.897089
ENSP00000226319	PHF17	1.17e-05	0.956	180	0
ENSP00000226413	GNRHR	5.73e-05	0.056	956	0.886755
ENSP00000226432	CWH43	2.49e-05	0.772	158	0.186739
ENSP00000226444	SULT1E1	2.3e-05	0.276	358	0.51216
ENSP00000226460	SMR3A	0.000116133	0.208	196	0.382158
ENSP00000226524	PF4V1	1.67e-05	0.416	0	0.408435
ENSP00000226574	NFKB1	1.49e-05	0.358	476	0
ENSP00000226730	IL2	1.33e-05	0.792	860	0.842423
ENSP00000226760	WFS1	3.71e-05	0.368	420	0.463555
ENSP00000226798	FRG1	9.32e-05	0.072	313	0.317536
ENSP00000226840	AADAT	1.09e-05	0.992	0	0.170768
ENSP00000227135	SPA17	1.5e-05	0.988	0	0.312062
ENSP00000227155	CD82	2.5e-05	0.294	797	0.844349
ENSP00000227163	SPI1	2.71e-05	0.368	995	0.966333
ENSP00000227251	CRYAB	4.16e-05	0.12	800	0.69553
ENSP00000227266	CTSC	1.45e-05	0.754	349	0.726894
ENSP00000227322	ZNF259	2.4e-05	0.936	215	0
ENSP00000227348	CRTAM	0.000155736	0.064	583	0.438506
ENSP00000227349	C11orf63	0.000329307	0.99	0	0.613962
ENSP00000227451	DTX4	2.88e-05	0.808	235	0.273204
ENSP00000227471	UNC93B1	1.33e-05	0.996	0	0.355558
ENSP00000227495	ST3GAL4	2.09e-05	0.822	286	0.74251
ENSP00000227507	CCND1	1.79e-05	0.36	945	0
ENSP00000227520	CCDC86	2.49e-05	0.99	0	0.452333
ENSP00000227524	PRPF19	1.46e-05	0.682	426	0.712062
ENSP00000227525	TMEM109	1.43e-05	0.998	0	0.341351
ENSP00000227618	ANAPC15	2.47e-05	0.546	215	0.41706
ENSP00000227638	PANX1	2.17e-05	0.998	0	0.344972
ENSP00000227667	APOC3	2.53e-05	0.526	329	0.642787
ENSP00000227752	IL10RA	2.45e-05	0.762	271	0.614986
ENSP00000227756	GALNT18	3.3e-05	0.4	153	0.28222
ENSP00000227758	BIRC2	1.58e-05	0.95	576	0.825164
ENSP00000227868	PDHX	1.37e-05	0.81	227	0.522614
ENSP00000227880	SLC15A3	3.15e-05	0.654	223	0.234059
ENSP00000227918	SCGB2A2	8.02e-05	0.162	201	0.309454
ENSP00000228027	DGAT2	2.14e-05	0.748	336	0.24674
ENSP00000228136	C11orf58	3.64e-05	0.992	0	0.305138
ENSP00000228251	YBX3	2.38e-05	0.892	251	0.642917
ENSP00000228280	KITLG	2.18e-05	0.478	436	0.887474
ENSP00000228284	SART3	4e-05	0.264	802	0.656716
ENSP00000228289	ZNF268	1.66e-05	0.772	246	0.99518
ENSP00000228307	PXN	1.27e-05	0.958	403	0.833217
ENSP00000228347	POLR3B	1.75e-05	0.3	396	0.802623
ENSP00000228434	CD69	1.15e-05	0.718	546	0.763507
ENSP00000228437	PRDM4	2.41e-05	0.296	416	0.972286
ENSP00000228438	CLEC2B	3.32e-05	0.174	271	0.467524
ENSP00000228463	SELPLG	1.43e-05	0.532	250	0.578667
ENSP00000228468	ASIC1	2.21e-05	0.482	212	0.389952
ENSP00000228476	DAO	3.85e-05	0.198	319	0.263188
ENSP00000228495	KCTD10	2.55e-05	0.816	199	0.251951
ENSP00000228506	MLEC	0.000110555	0.866	262	0.141718
ENSP00000228510	MVK	1.24e-05	0.984	176	0.271978
ENSP00000228515	CSRNP2	0.000138196	0.172	158	0.323959
ENSP00000228534	IL23A	1.44e-05	0.718	227	0.650556
ENSP00000228567	SYT10	3.23e-05	0.432	259	0.306815
ENSP00000228606	CYP27B1	1.54e-05	0.616	299	0.656901
ENSP00000228641	MYF6	6.64e-05	0.038	917	0.966646
ENSP00000228644	MYF5	7.14e-05	0.02	907	0.978401
ENSP00000228682	GLI1	4.7e-05	0.054	801	0.974658
ENSP00000228705	PPM1H	1.77e-05	0.998	0	0.395042
ENSP00000228740	LTA4H	1.86e-05	0.978	198	0.277874
ENSP00000228741	ELK3	8.94e-05	0.506	181	0.596306
ENSP00000228799	ITFG2	1.08e-05	0.998	0	0.356336
ENSP00000228811	PRR4	8.31e-05	0.978	0	0.408531
ENSP00000228837	FGF6	7.53e-05	0.204	833	0.955359
ENSP00000228841	MYL2	1.96e-05	0.242	519	0.622744
ENSP00000228843	RAD51AP1	1.06e-05	0.994	0	0.532888
ENSP00000228862	DUSP16	2.49e-05	0.178	296	0.815374
ENSP00000228865	CREBL2	4.91e-05	0.912	0	0.372177
ENSP00000228872	CDKN1B	2.45e-05	0.272	850	0.931405
ENSP00000228887	GPRC5D	6.23e-05	0.266	158	0.53239
ENSP00000228918	LTBR	2.11e-05	0.82	607	0.807297
ENSP00000228936	ART4	5.13e-05	0.37	150	0.336936
ENSP00000228938	MGP	1.95e-05	0.16	323	0.817436
ENSP00000228945	ARHGDIB	1.06e-05	0.984	153	0.484362
ENSP00000229030	FZD10	6.08e-05	0.068	947	0.876701
ENSP00000229134	IL26	2.04e-05	0.546	296	0.579652
ENSP00000229135	IFNG	1.54e-05	0.402	516	0
ENSP00000229179	NUP107	1.24e-05	0.87	196	0
ENSP00000229195	CNOT2	2.22e-05	0.496	286	0.524977
ENSP00000229239	GAPDH	1.87e-05	0.236	673	0
ENSP00000229243	ACRBP	3.23e-05	0.358	195	0.219378
ENSP00000229251	COPS7A	1.28e-05	0.99	0	0.325645
ENSP00000229264	GNB3	1.36e-05	0.566	664	0.984382
ENSP00000229266	CHPT1	3.11e-05	0.95	181	0.115154
ENSP00000229277	ENO2	1.76e-05	0.3	213	0.710927
ENSP00000229281	C12orf57	0.000318249	0.022	254	0.364219
ENSP00000229304	APOBEC1	4.25e-05	0.118	270	0.313044
ENSP00000229307	NANOG	5.53e-05	0.134	958	0.980316
ENSP00000229314	GOLT1B	6.65e-05	0.948	153	0.242154
ENSP00000229329	CMAS	2.07e-05	0.564	446	0.42212
ENSP00000229330	HCFC2	1.8e-05	0.49	212	0.682929
ENSP00000229335	AICDA	2.82e-05	0.256	925	0.774581
ENSP00000229340	RAB35	2.19e-05	0.88	687	0.352241
ENSP00000229379	COX6A1	1.14e-05	0.934	198	0.458823
ENSP00000229390	SRSF9	1.58e-05	0.964	249	0.748091
ENSP00000229395	FGFR1OP2	7.07e-05	0.92	198	0.178425
ENSP00000229402	KLRB1	2.24e-05	0.402	345	0.654474
ENSP00000229416	GCLC	2.41e-05	0.976	829	0.361263
ENSP00000229447	IYD	2.12e-05	0.424	181	0.180183
ENSP00000229554	RSPH4A	3.37e-05	0.258	197	0.309061
ENSP00000229570	SMIM8	2.22e-05	0.89	0	0.627354
ENSP00000229583	ADTRP	4.56e-05	0.206	452	0.22453
ENSP00000229595	ASF1A	1.73e-05	0.946	212	0.783762
ENSP00000229633	HINT3	8.43e-05	0.994	0	0.524528
ENSP00000229708	ULBP1	5.72e-05	0.712	216	0.380782
ENSP00000229758	FBXO5	2.26e-05	0.906	291	0.495554
ENSP00000229769	FANCE	5.83e-05	0.976	0	0.563469
ENSP00000229794	MAPK14	1.3e-05	0.424	990	0
ENSP00000229829	HLA-DOA	0.000101784	0.23	188	0.233154
ENSP00000229903	SAYSD1	0.00195529	0.82	0	0.707061
ENSP00000229922	CAP2	1.05e-05	0.99	525	0.543933
ENSP00000229955	GPR63	6.01e-05	0.158	198	0.60976
ENSP00000229971	FBXL4	1.75e-05	0.624	161	0
ENSP00000230012	HDGFL1	1.62e-05	0.516	0	0
ENSP00000230036	GPLD1	2.18e-05	0.51	523	0.106
ENSP00000230053	B3GAT2	2.18e-05	0.58	204	0.477284
ENSP00000230056	GMNN	7.48e-05	0.212	806	0.47179
ENSP00000230085	SNX3	4.93e-05	0.71	232	0.411905
ENSP00000230099	TRIM38	0.000155397	0.954	0	0
ENSP00000230122	ZBTB24	1.71e-05	0.668	246	0.987073
ENSP00000230124	FIG4	1.53e-05	0.826	373	0.258598
ENSP00000230256	UNC93A	7.5e-05	0.146	352	0.224126
ENSP00000230321	MDFI	1.81e-05	0.748	827	0.253884
ENSP00000230323	TFEB	1.89e-05	0.304	532	0
ENSP00000230354	TBP	1.27e-05	0.702	663	0
ENSP00000230361	GUCA1B	3.02e-05	0.146	821	0.486357
ENSP00000230381	PRPH2	9.06e-05	0.066	512	0.656922
ENSP00000230419	PTK7	1.45e-05	0.614	730	0.994222
ENSP00000230431	DNPH1	5.51e-05	0.118	310	0.623295
ENSP00000230449	EXOC2	1.21e-05	0.964	188	0.422583
ENSP00000230461	TMEM30A	3.37e-05	0.976	299	0.196774
ENSP00000230538	LAMA4	1.45e-05	0.826	0	0.446263
ENSP00000230565	ENPP5	1.05e-05	0.994	0	0.166129
ENSP00000230582	PRSS16	4.04e-05	0.236	560	0.28343
ENSP00000230588	MEP1A	0.000108523	0.07	556	0.2005
ENSP00000230658	ISL1	9.78e-05	0.08	926	0.983529
ENSP00000230671	SLC6A7	7.91e-05	0.248	485	0.445057
ENSP00000230732	POU4F3	0.000181946	0.012	438	0.952657
ENSP00000230792	NUDT12	1.71e-05	0.902	224	0.133223
ENSP00000230882	GHR	2.03e-05	0.558	725	0.866202
ENSP00000230895	DAP	2.59e-05	0.824	379	0.681215
ENSP00000230990	HBEGF	1.95e-05	0.37	825	0.883013
ENSP00000231004	LOX	3.01e-05	0.246	311	0.784609
ENSP00000231021	CDH9	6.82e-05	0.544	436	0.473859
ENSP00000231061	SPARC	3.06e-05	0.238	289	0.860702
ENSP00000231121	HAND1	0.000111701	0.012	964	0.975824
ENSP00000231130	PCDHB3	0.000192098	0.53	155	0.363647
ENSP00000231134	PCDHB5	9.83e-05	0.624	198	0.286191
ENSP00000231136	PCDHB6	1.32e-05	0.666	0	0.332358
ENSP00000231137	PCDHB7	8.1e-05	0.492	157	0.310558
ENSP00000231173	PCDHB15	0.000100154	0.962	195	0.392869
ENSP00000231198	THG1L	6.79e-05	0.696	197	0.242848
ENSP00000231228	IL12B	2.3e-05	0.456	223	0.664566
ENSP00000231238	TTC1	2.24e-05	0.874	256	0.216146
ENSP00000231357	IRX4	0.000134226	0.04	726	0.967229
ENSP00000231368	LNPEP	1.35e-05	0.892	242	0.361149
ENSP00000231420	AGXT2	2.43e-05	0.406	245	0.307003
ENSP00000231449	IL4	1.51e-05	0.82	993	0.826939
ENSP00000231454	IL5	2.39e-05	0.396	991	0.800512
ENSP00000231461	ST8SIA4	1.1e-05	0.758	167	0.714626
ENSP00000231484	PCDH12	2.12e-05	0.338	0	0.311622
ENSP00000231487	SKP1	1.73e-05	0.364	408	0.83861
ENSP00000231509	NR3C1	2.38e-05	0.524	312	0.940089
ENSP00000231512	C5orf15	7.95e-05	0.958	0	0.312598
ENSP00000231524	TRIM23	1.05e-05	0.954	520	0.454456
ENSP00000231572	RARS	3.18e-05	0.13	999	0.704143
ENSP00000231656	CDX1	7.13e-05	0.02	924	0.982135
ENSP00000231668	BNIP1	1.57e-05	0.99	0	0.301598
ENSP00000231721	SEMA3G	2.31e-05	0.534	251	0.303054
ENSP00000231749	ZMYND10	9.01e-05	0.144	191	0.293717
ENSP00000231751	LTF	2.74e-05	0.442	191	0.493634
ENSP00000231790	MLH1	1.7e-05	0.424	501	0.781233
ENSP00000231948	CRBN	7.21e-05	0.352	561	0.187996
ENSP00000232014	BCL6	1.88e-05	0.214	919	0.95212
ENSP00000232217	RBP2	4.38e-05	0.236	631	0.553505
ENSP00000232219	RBP1	5.91e-05	0.182	650	0.726247
ENSP00000232375	PFKFB4	1.37e-05	0.936	835	0.137905
ENSP00000232424	HES1	8.48e-05	0.222	688	0.952477
ENSP00000232461	GNAT1	2.91e-05	0.134	782	0.986762
ENSP00000232496	TUSC2	2.55e-05	0.79	0	0.310556
ENSP00000232501	NPRL2	1.29e-05	0.992	0	0.15957
ENSP00000232564	GNB4	1.41e-05	0.56	800	0.988067
ENSP00000232603	MORC1	3.54e-05	0.75	452	0.208244
ENSP00000232744	ABTB1	2.7e-05	0.202	201	0.707755
ENSP00000232854	HEMK1	1.49e-05	0.624	317	0.666019
ENSP00000232905	EIF1B	2.05e-05	0.984	183	0.660165
ENSP00000232974	ZBTB47	1.8e-05	0.74	246	0.989339
ENSP00000232975	TNNC1	1.09e-05	0.886	508	0.983196
ENSP00000232978	NKTR	1.07e-05	0.994	0	0.635969
ENSP00000233025	SPCS1	1.2e-05	0.97	900	0.5025
ENSP00000233047	TMEM159	0.000681702	0.94	0	0.51505
ENSP00000233055	WDFY1	2.12e-05	0.944	182	0.302367
ENSP00000233057	EIF2AK2	2.42e-05	0.928	224	0.68998
ENSP00000233078	DAZAP1	3.52e-05	0.948	209	0.715655
ENSP00000233084	DDX1	1.59e-05	0.976	256	0.759731
ENSP00000233099	HEATR5B	3.4e-05	0.98	0	0.214936
ENSP00000233121	MAPRE3	1.16e-05	0.952	537	0.627362
ENSP00000233143	TMSB10	1.32e-05	0.996	0	0.128279
ENSP00000233154	NCK2	1.06e-05	0.97	230	0.653871
ENSP00000233156	TFPI	2.14e-05	0.748	211	0.668213
ENSP00000233202	SLC11A1	2.33e-05	0.678	378	0.502389
ENSP00000233331	INO80B	3.21e-05	0.462	167	0.3399
ENSP00000233336	TTL	2.54e-05	0.692	351	0.524256
ENSP00000233379	FAHD2A	1.61e-05	0.992	0	0.188304
ENSP00000233535	SLC30A3	1.17e-05	0.97	264	0.198213
ENSP00000233545	MPV17	1.41e-05	0.74	181	0.132602
ENSP00000233557	NRBP1	4.91e-05	0.706	901	0.773712
ENSP00000233575	SNX17	1.81e-05	0.996	0	0.160094
ENSP00000233596	REEP6	2.28e-05	0.794	278	0.236452
ENSP00000233607	APC2	2.95e-05	0.632	619	0.786297
ENSP00000233615	WBP1	1.28e-05	0.59	0	0.421318
ENSP00000233616	MOGS	2.59e-05	0.692	369	0.297269
ENSP00000233627	NDUFS7	1.67e-05	0.862	191	0.297254
ENSP00000233630	PCGF1	9.94e-05	0.118	178	0.760529
ENSP00000233638	TLX2	0.000131307	0.244	421	0.775093
ENSP00000233668	DOK1	1.75e-05	0.996	0	0.519991
ENSP00000233712	EVA1A	6.98e-05	0.994	0	0.557712
ENSP00000233714	LANCL1	2.97e-05	0.818	214	0.262266
ENSP00000233735	REG1A	5.89e-05	0.174	345	0.302864
ENSP00000233809	IGFBP2	1.69e-05	0.514	456	0.863469
ENSP00000233813	IGFBP5	3.6e-05	0.178	410	0.855469
ENSP00000233826	KCNJ13	5.02e-05	0.14	228	0.351743
ENSP00000233838	GGCX	2.29e-05	0.99	0	0.262049
ENSP00000233840	NEU2	4.76e-05	0.138	206	0.489504
ENSP00000233944	PRKAG3	1.12e-05	0.912	996	0.959485
ENSP00000233946	IL1R1	1.43e-05	0.942	213	0
ENSP00000233948	WNT6	0.000115083	0.018	926	0.982741
ENSP00000233954	IL1RL1	2.15e-05	0.43	255	0.550301
ENSP00000233957	IL18R1	1.98e-05	0.596	260	0.573622
ENSP00000233969	SLC9A2	2.39e-05	0.644	274	0.316042
ENSP00000233997	AZU1	1.09e-05	0.764	483	0.577153
ENSP00000234040	PASK	1.22e-05	0.938	501	0.993437
ENSP00000234071	PROC	1.57e-05	0.76	301	0.844921
ENSP00000234091	ID2	5.18e-05	0.104	842	0.977369
ENSP00000234111	ODC1	1.17e-05	0.98	268	0.574669
ENSP00000234142	GREB1	1.37e-05	0.684	242	0.256291
ENSP00000234170	CEBPZ	1.02e-05	0.978	254	0.705623
ENSP00000234179	PRKD3	1.81e-05	0.874	176	0.401366
ENSP00000234195	RMDN2	0.000119968	0.606	206	0.238388
ENSP00000234198	DLX2	0.000158813	0.032	975	0.985222
ENSP00000234256	SLC1A4	1.18e-05	0.952	199	0.439786
ENSP00000234296	ORC2	1.09e-05	0.944	167	0
ENSP00000234301	COX7A2L	0.000132147	0.958	0	0.314809
ENSP00000234310	PPP3R1	1.53e-05	0.716	352	0.983732
ENSP00000234313	PLEK	1.86e-05	0.522	216	0.817048
ENSP00000234371	KISS1R	8.58e-05	0.03	918	0.80387
ENSP00000234389	GRIN3B	2.66e-05	0.368	537	0.563762
ENSP00000234392	VAX2	0.000372215	0	501	0.947874
ENSP00000234420	MSH6	1.14e-05	0.84	261	0.683954
ENSP00000234453	PLEKHA3	1.5e-05	0.994	0	0.253044
ENSP00000234454	SPR	6.6e-05	0.752	167	0.154207
ENSP00000234488	CLCN6	2.66e-05	0.714	253	0.201898
ENSP00000234590	ENO1	1.51e-05	0.282	343	0.668172
ENSP00000234626	CDC7	1.2e-05	0.946	255	0.65372
ENSP00000234677	SARS	2.17e-05	0.674	818	0.797098
ENSP00000234701	CLCA1	3e-05	0.434	800	0.411956
ENSP00000234739	BCL9	2.3e-05	0.482	234	0.646506
ENSP00000234798	TPSG1	3.11e-05	0.336	165	0.273221
ENSP00000234800	SLC35E2B	5.09e-05	0.254	234	0
ENSP00000234831	TMEM59	9.62e-05	0.966	0	0.341566
ENSP00000234961	OPRD1	3.46e-05	0.264	912	0.837457
ENSP00000235090	WDR77	1.53e-05	0.914	158	0.579928
ENSP00000235180	DLGAP3	7.49e-05	0.156	696	0.430497
ENSP00000235307	C1orf21	1.43e-05	0.942	0	0.621785
ENSP00000235310	MAD2L2	2.56e-05	0.758	263	0.609354
ENSP00000235332	MIIP	5.96e-05	0.714	0	0.343596
ENSP00000235345	SLC35D1	4.3e-05	0.502	416	0.22975
ENSP00000235347	PRAMEF10	0.00112197	0.996	0	0.670931
ENSP00000235349	PRAMEF4	2.03e-05	0.766	0	0.621226
ENSP00000235372	PRDM2	7.19e-05	0.118	560	0.939389
ENSP00000235382	RGS2	3.25e-05	0.182	925	0.824627
ENSP00000235521	WARS2	1.35e-05	0.926	484	0.733999
ENSP00000235532	OSCP1	5.28e-05	0.326	191	0.264308
ENSP00000235628	NT5C1A	2.07e-05	0.38	309	0.449548
ENSP00000235835	AKR7A2	1.71e-05	0.996	0	0.15869
ENSP00000235932	RAB7L1	1.46e-05	0.99	0	0
ENSP00000235933	CD160	1.97e-05	0.562	0	0.534825
ENSP00000236137	SLC19A2	8.3e-05	0.668	265	0.270759
ENSP00000236147	SELL	1.92e-05	0.542	560	0.764742
ENSP00000236166	FMO6P	1.33e-05	0.576	188	0
ENSP00000236273	SYF2	1.17e-05	0.976	228	0.389806
ENSP00000236709	A4GNT	3.5e-05	0.446	323	0.678928
ENSP00000236826	MMP8	4.74e-05	0.102	359	0.871843
ENSP00000236850	APOA1	1.67e-05	0.43	392	0.764756
ENSP00000236877	SLC8A2	4.9e-05	0.196	227	0.24807
ENSP00000236959	ATIC	1.31e-05	0.978	428	0.6221
ENSP00000236979	TNP1	2.58e-05	0.476	325	0.349455
ENSP00000236980	FASTKD2	1.78e-05	0.996	0	0.277839
ENSP00000237014	TTR	4.17e-05	0.148	418	0.864324
ENSP00000237172	FILIP1	2.35e-05	0.998	0	0.287649
ENSP00000237264	TBPL1	1.65e-05	0.688	444	0
ENSP00000237275	ZC2HC1B	1.17e-05	0.992	0	0.453709
ENSP00000237281	FBXO30	0.000487093	0.934	0	0.449591
ENSP00000237283	ADAT2	1.19e-05	0.992	503	0.577545
ENSP00000237289	TNFAIP3	2.06e-05	0.944	254	0.759466
ENSP00000237316	TCF21	7.88e-05	0.046	421	0.914766
ENSP00000237380	MED28	3.15e-05	0.972	284	0.805011
ENSP00000237449	DNAH6	2.81e-05	0.444	339	0.593819
ENSP00000237455	RNF103	2.88e-05	0.618	250	0.385959
ENSP00000237500	MYL12B	1.03e-05	0.958	720	0.607387
ENSP00000237527	GHRH	8.32e-05	0.016	979	0.819872
ENSP00000237536	SOGA1	7.07e-05	0.68	355	0.207855
ENSP00000237596	PKD2	1.5e-05	0.872	418	0.361698
ENSP00000237612	ABCG2	3.27e-05	0.142	377	0.787022
ENSP00000237654	CCNI	1.11e-05	0.982	201	0.815621
ENSP00000237822	C2orf43	3.53e-05	0.93	179	0
ENSP00000237837	FGF23	3.91e-05	0.094	695	0.916397
ENSP00000237853	ELL2	1.1e-05	0.994	0	0.760168
ENSP00000237858	GLRX	1.41e-05	0.89	206	0.24933
ENSP00000237937	ZFAND5	1.24e-05	0.998	0	0.216912
ENSP00000238018	GDA	4.36e-05	0.604	527	0.25385
ENSP00000238044	C2orf40	4.67e-05	0.238	210	0.309768
ENSP00000238081	YWHAQ	1.31e-05	0.766	263	0.981639
ENSP00000238146	DDX55	1.24e-05	0.956	310	0.731274
ENSP00000238156	CCDC92	0.000207003	0.87	0	0.400576
ENSP00000238256	FKBP15	4.46e-05	0.68	211	0.476055
ENSP00000238341	CNTRL	1.58e-05	0.996	0	0.487285
ENSP00000238379	HDHD3	3.53e-05	0.792	195	0.265483
ENSP00000238497	VPS4B	2.03e-05	0.99	186	0.350957
ENSP00000238508	SERPINB10	2.77e-05	0.436	161	0.24405
ENSP00000238558	GSC	7.82e-05	0.08	600	0.958403
ENSP00000238609	IFI27L2	5.26e-05	0.352	167	0.466162
ENSP00000238616	NEK9	1.03e-05	0.974	200	0.345576
ENSP00000238618	ACYP1	8.76e-05	0.452	213	0.244441
ENSP00000238628	IFT43	2.86e-05	0.926	208	0.74723
ENSP00000238647	IRF2BPL	0.000102238	0.956	0	0.380606
ENSP00000238651	ACOT2	2.25e-05	0.858	165	0.135439
ENSP00000238667	FLVCR2	4.16e-05	0.352	150	0.212275
ENSP00000238682	TGFB3	5.29e-05	0.15	849	0.966211
ENSP00000238714	PAPOLG	2.54e-05	0.578	816	0.685945
ENSP00000238721	TP53I3	1.05e-05	0.976	188	0.171796
ENSP00000238788	TMEM214	1.04e-05	0.994	0	0.22069
ENSP00000238789	ATAD2B	1.1e-05	0.866	555	0.520665
ENSP00000238823	FAM98A	2.13e-05	0.996	0	0.317362
ENSP00000238831	YIPF4	2.42e-05	0.992	0	0.391025
ENSP00000238855	AFTPH	2.43e-05	0.998	0	0.31777
ENSP00000238875	LGALSL	8.15e-05	0.908	152	0.327822
ENSP00000238892	CRIPT	4.92e-05	0.89	211	0.241482
ENSP00000238936	TMEM180	0.000201304	0.932	0	0.572904
ENSP00000238994	PPP1R3C	2.17e-05	0.992	0	0.229088
ENSP00000239027	HELLS	3.68e-05	0.112	775	0.844328
ENSP00000239032	PRLHR	4.09e-05	0.292	261	0.574225
ENSP00000239125	C10orf95	9.11e-05	0.248	163	0
ENSP00000239144	HOXB8	0.000160583	0.014	810	0.975697
ENSP00000239151	HOXB5	0.000146764	0.082	825	0.976508
ENSP00000239165	HOXB7	0.000114872	0.012	898	0.980528
ENSP00000239223	DUSP1	1.55e-05	0.898	690	0.846158
ENSP00000239231	PANK3	0.000125698	0.84	200	0.247089
ENSP00000239243	MSX2	8.72e-05	0.048	857	0.978935
ENSP00000239367	LRP11	7.44e-05	0.994	0	0.336559
ENSP00000239444	PCDHB8	1.28e-05	0.724	0	0.35621
ENSP00000239446	PCDHB10	4.52e-05	0.994	0	0.325789
ENSP00000239449	PCDHB14	8.57e-05	0.964	173	0.307928
ENSP00000239451	SLC25A2	4.49e-05	0.304	191	0.184464
ENSP00000239461	PRRX1	7.97e-05	0.04	653	0.973054
ENSP00000239462	TNN	2.27e-05	0.284	428	0.509617
ENSP00000239614	MSANTD2	1.53e-05	0.484	0	0.439562
ENSP00000239666	PDZD11	8.42e-05	0.622	151	0.246207
ENSP00000239690	NUDCD1	1.88e-05	0.994	0	0.258785
ENSP00000239730	-	1.28e-05	0.996	173	0
ENSP00000239761	MRC1	1.77e-05	0.602	213	0
ENSP00000239830	CCDC77	3.03e-05	0.998	0	0.469171
ENSP00000239849	TNFSF11	1.98e-05	0.384	812	0.866059
ENSP00000239878	UFM1	5.27e-05	0.976	0	0.220999
ENSP00000239882	ELF1	6.06e-05	0.4	178	0.925565
ENSP00000239891	ALG5	1.63e-05	0.85	224	0.251898
ENSP00000239906	FAM53C	2.37e-05	0.328	0	0.529422
ENSP00000239926	MYOT	2.1e-05	0.938	159	0.202477
ENSP00000239938	EGR1	2.6e-05	0.202	843	0.936336
ENSP00000239940	PFN2	1.03e-05	0.95	354	0.424948
ENSP00000240050	MTERFD3	1.98e-05	0.86	0	0
ENSP00000240055	NFYB	1.3e-05	0.668	376	0
ENSP00000240093	FZD3	6.07e-05	0.058	958	0.917854
ENSP00000240100	DUSP4	1.64e-05	0.634	832	0.816059
ENSP00000240123	SORBS3	4.36e-05	0.276	580	0.32727
ENSP00000240139	PPP3CC	1.36e-05	0.46	429	0.968357
ENSP00000240185	TARDBP	1.35e-05	0.984	330	0.63907
ENSP00000240189	PRAMEF2	0.00354528	0.988	0	0.657388
ENSP00000240285	RDH10	5.09e-05	0.664	953	0.299264
ENSP00000240316	COIL	2.11e-05	0.954	254	0.675029
ENSP00000240327	SPOP	1.22e-05	0.964	576	0.812767
ENSP00000240328	TBX2	0.000114103	0.008	541	0.980302
ENSP00000240335	TBX4	0.000155299	0.002	760	0.981449
ENSP00000240343	DYNLL2	2.42e-05	0.642	234	0
ENSP00000240361	TEX14	3.09e-05	0.328	229	0.224824
ENSP00000240364	FAM117A	7.96e-05	0.208	150	0.4989
ENSP00000240423	NCAPH	4.55e-05	0.14	420	0.601193
ENSP00000240488	MND1	3.37e-05	0.524	514	0.367682
ENSP00000240499	ZNF141	2.1e-05	0.506	246	0.973021
ENSP00000240587	TSHZ3	0.000238354	0.096	345	0.516237
ENSP00000240617	PLBD1	3.65e-05	0.994	0	0.364816
ENSP00000240618	KLRK1	2.25e-05	0.408	158	0
ENSP00000240651	PYROXD1	4.79e-05	1	0	0.374987
ENSP00000240652	IAPP	8.17e-05	0.046	986	0.752582
ENSP00000240662	KCNJ8	2.7e-05	0.394	484	0.376438
ENSP00000240687	TAS2R7	6.11e-05	0.336	0	0.656717
ENSP00000240691	TAS2R9	2.77e-05	0.522	0	0.459013
ENSP00000240731	ZNF211	1.95e-05	0.71	246	0.996503
ENSP00000240851	TFG	1.16e-05	0.994	0	0.740142
ENSP00000240874	KALRN	1.53e-05	0.502	913	0.749862
ENSP00000240986	GJA8	0.000122202	0.066	537	0
ENSP00000241014	MAPK8IP1	6.49e-05	0.076	801	0.784337
ENSP00000241051	DEPDC7	2e-05	0.996	0	0.300142
ENSP00000241052	CAT	1.42e-05	0.43	461	0.89349
ENSP00000241124	GJB6	4.22e-05	0.092	395	0.406395
ENSP00000241125	GJA3	7.49e-05	0.228	507	0.297015
ENSP00000241256	GHSR	3.49e-05	0.182	948	0.800658
ENSP00000241261	TNFSF10	1.21e-05	0.758	195	0.813756
ENSP00000241274	SLITRK3	7.46e-05	0.166	166	0.350044
ENSP00000241312	CSMD2	5.11e-05	0.136	224	0.186458
ENSP00000241337	GSTM2	4.71e-05	0.556	158	0.308667
ENSP00000241416	ACVR2A	9.97e-05	0.1	722	0.929328
ENSP00000241453	FLT3	1.34e-05	0.594	903	0.960938
ENSP00000241463	RASL11A	1.33e-05	0.81	448	0.943675
ENSP00000241502	FYTTD1	2.33e-05	0.994	0	0.42358
ENSP00000241527	MTERFD2	2.8e-05	0.994	0	0
ENSP00000241600	MRPS2	1.34e-05	0.866	303	0.831481
ENSP00000241651	MYOG	5.31e-05	0.106	920	0.974654
ENSP00000241808	PRM2	1.61e-05	0.592	450	0.351326
ENSP00000242057	AHR	7.25e-05	0.158	394	0.927301
ENSP00000242104	OCM	1.3e-05	0.676	508	0
ENSP00000242108	EEPD1	1.4e-05	0.99	0	0.23048
ENSP00000242109	KIAA0087	2.06e-05	0.446	0	0
ENSP00000242152	NPY	6.95e-05	0.04	987	0.913363
ENSP00000242159	HOXA7	0.000152054	0.06	894	0.982047
ENSP00000242208	INHBA	7.06e-05	0.052	418	0.964695
ENSP00000242209	FKBP9	1.19e-05	0.994	205	0.392807
ENSP00000242210	NT5C3A	1.28e-05	0.988	0	0.218266
ENSP00000242248	POLM	1.65e-05	0.626	252	0.37691
ENSP00000242249	RAMP3	1.66e-05	0.402	0	0.383207
ENSP00000242261	TWIST1	7.32e-05	0.104	954	0.97973
ENSP00000242285	CLTA	1.29e-05	0.97	168	0.332688
ENSP00000242315	KIAA1045	1.05e-05	0.778	0	0
ENSP00000242317	DNAI1	2.44e-05	0.286	377	0.291232
ENSP00000242338	CNTFR	2.2e-05	0.43	222	0.712961
ENSP00000242351	ZC3HAV1	5.77e-05	0.98	0	0.320372
ENSP00000242375	AKR1D1	1.68e-05	0.868	329	0.26395
ENSP00000242462	NEUROG3	0.000102591	0.02	923	0.967929
ENSP00000242480	EGR2	6.28e-05	0.078	745	0.96729
ENSP00000242505	FAM149B1	1.17e-05	0.952	0	0.402682
ENSP00000242576	UNG	1.83e-05	0.568	290	0.650693
ENSP00000242577	DYNLL1	1.68e-05	0.792	911	0.577744
ENSP00000242591	IFT81	2.23e-05	0.998	0	0.241828
ENSP00000242607	HVCN1	1.36e-05	1	0	0.144757
ENSP00000242719	RNF11	1.95e-05	0.784	165	0.572739
ENSP00000242728	BHLHE41	8.05e-05	0.088	971	0.937894
ENSP00000242729	SSPN	4.04e-05	0.29	198	0.200107
ENSP00000242776	DDX39A	1.18e-05	0.838	524	0.765169
ENSP00000242784	C19orf43	7.81e-05	0.99	0	0.550655
ENSP00000242786	CD97	1.77e-05	0.906	177	0
ENSP00000242796	WDR83	3.31e-05	0.974	0	0
ENSP00000242804	ZNF442	2.08e-05	0.714	246	0.997523
ENSP00000242810	KLHL24	7.16e-05	0.962	0	0.296072
ENSP00000242827	EBPL	3.62e-05	0.402	151	0.302555
ENSP00000242839	ATP7B	1.53e-05	0.974	512	0.396266
ENSP00000242872	CENPK	1.84e-05	0.914	246	0.571983
ENSP00000242994	NEUROD4	0.000457191	0	938	0.945702
ENSP00000243045	ORMDL2	2.11e-05	0.994	0	0.19251
ENSP00000243052	PDE1B	5.21e-05	0.19	198	0.223508
ENSP00000243056	HOXC13	0.000151042	0.046	725	0.944104
ENSP00000243077	LRP1	2.64e-05	0.434	377	0.787418
ENSP00000243103	HOXC12	0.000140495	0.018	710	0.889251
ENSP00000243108	HOXC6	0.000218983	0.042	453	0.98062
ENSP00000243167	FAAH	2.97e-05	0.186	448	0.239803
ENSP00000243213	IL13RA2	5.3e-05	0.228	0	0.375285
ENSP00000243222	COL10A1	4.26e-05	0.274	900	0.5873
ENSP00000243253	SEC61A1	1.05e-05	0.926	559	0.485811
ENSP00000243286	TCEAL3	1.01e-05	0.964	0	0.43404
ENSP00000243314	MAGEA9B	1.33e-05	0.696	0	0
ENSP00000243326	RIF1	1.46e-05	0.99	0	0.430749
ENSP00000243344	TTC21B	3.3e-05	0.824	299	0.393345
ENSP00000243346	NMI	2.34e-05	0.992	0	0.53152
ENSP00000243347	TNFAIP6	2.44e-05	0.396	295	0.715621
ENSP00000243349	ACVR1C	5.11e-05	0.086	519	0.910197
ENSP00000243389	SLC36A1	1.33e-05	0.936	201	0.468181
ENSP00000243440	BATF3	1.49e-05	0.644	307	0
ENSP00000243457	KCNJ2	3.2e-05	0.166	498	0.481796
ENSP00000243563	SNRPA	2.24e-05	0.564	374	0.807059
ENSP00000243611	C4BPB	1.39e-05	0.994	0	0.182965
ENSP00000243643	ZNF415	2.53e-05	0.36	246	0.994705
ENSP00000243644	ZNF350	1.83e-05	0.752	246	0.971948
ENSP00000243662	RAB38	2.94e-05	0.646	205	0.35632
ENSP00000243673	GPR83	2.26e-05	0.412	216	0.366471
ENSP00000243706	HAUS3	1.87e-05	0.994	0	0.177207
ENSP00000243776	CHPF	2.15e-05	0.842	240	0.285615
ENSP00000243786	INHA	5.39e-05	0.07	372	0.962049
ENSP00000243896	SLC35C2	2.53e-05	0.93	398	0.220767
ENSP00000243903	ACTR5	1.17e-05	0.996	859	0.294837
ENSP00000243911	MC3R	6.7e-05	0.046	902	0.734675
ENSP00000243914	CTCFL	2.54e-05	0.236	759	0.967808
ENSP00000243918	SYS1	3.23e-05	0.88	719	0.324056
ENSP00000243924	PI3	1.66e-05	0.262	586	0.865697
ENSP00000243938	WFDC3	0.00022192	0.046	158	0.48627
ENSP00000244007	PLCG1	1.75e-05	0.65	246	0.834533
ENSP00000244020	SRSF6	1.55e-05	0.904	215	0.753263
ENSP00000244040	RAB22A	1.52e-05	0.988	357	0.654741
ENSP00000244043	PTGIS	1.19e-05	0.984	627	0.495057
ENSP00000244050	SNAI1	5.12e-05	0.124	829	0.97994
ENSP00000244061	RNF114	1.87e-05	0.994	0	0.302082
ENSP00000244096	MAGEA10	0.00011747	0.192	198	0.238877
ENSP00000244137	PEPD	1.31e-05	0.678	360	0.603616
ENSP00000244174	IL9R	7.02e-05	0.082	207	0.483805
ENSP00000244217	MCEE	2.16e-05	0.868	191	0.19058
ENSP00000244221	PAIP2B	2.09e-05	0.906	410	0.296587
ENSP00000244227	SNRNP27	0.000121603	0.304	159	0.265854
ENSP00000244230	MPHOSPH10	1.47e-05	0.928	293	0.70125
ENSP00000244241	IL17C	4.71e-05	0.246	305	0.458152
ENSP00000244289	LIPE	2.74e-05	0.49	800	0.23313
ENSP00000244333	LYPD3	4.52e-05	0.286	210	0.597912
ENSP00000244360	RNF39	2.5e-05	0.884	605	0.7841
ENSP00000244364	DST	3.81e-05	0.154	381	0.630367
ENSP00000244458	PACSIN1	2.56e-05	0.472	258	0.317162
ENSP00000244513	BTN1A1	2.65e-05	0.348	309	0.528909
ENSP00000244519	BTN3A3	2.68e-05	0.998	0	0.298531
ENSP00000244520	SNRPC	1.99e-05	0.986	225	0.709556
ENSP00000244527	SLC17A1	1.15e-05	0.718	273	0.375464
ENSP00000244565	UNC5CL	5.49e-05	0.292	207	0.318552
ENSP00000244573	HIST1H1A	2.26e-05	0.844	439	0.652036
ENSP00000244576	ZNF391	2.63e-05	0.72	246	0.998165
ENSP00000244669	APOBEC2	5.04e-05	0.304	227	0.15488
ENSP00000244709	TREM1	2.82e-05	0.996	0	0.477946
ENSP00000244711	MEA1	3.39e-05	0.508	215	0.38184
ENSP00000244728	COL21A1	2.69e-05	0.52	900	0.573075
ENSP00000244741	CDKN1A	1.99e-05	0.402	916	0
ENSP00000244745	SOX4	0.000155078	0.126	674	0.962541
ENSP00000244751	CPNE5	5.94e-05	0.346	418	0.346922
ENSP00000244763	SSR1	3.51e-05	0.966	156	0.534802
ENSP00000244769	ATXN1	1.41e-05	0.972	842	0.793516
ENSP00000244869	EREG	1.7e-05	0.57	560	0.833949
ENSP00000244926	SCGB1D2	6.76e-05	0.996	0	0.578124
ENSP00000244930	SCGB2A1	4.65e-05	0.768	360	0.246465
ENSP00000245046	EMC3	1.24e-05	0.992	0	0.153263
ENSP00000245121	KATNAL2	3.59e-05	0.15	500	0.341458
ENSP00000245157	BBS2	3.24e-05	0.426	288	0.66378
ENSP00000245185	MT2A	1.47e-05	0.978	0	0.279251
ENSP00000245206	GOT2	2.33e-05	0.602	919	0.366387
ENSP00000245255	PIWIL1	3.02e-05	0.85	585	0.668329
ENSP00000245304	RAP2A	1.24e-05	0.802	448	0.941966
ENSP00000245323	EFNB2	4.56e-05	0.122	928	0.911082
ENSP00000245407	SLC22A5	2.75e-05	0.978	0	0.372452
ENSP00000245414	IRF1	2.01e-05	0.502	804	0.863102
ENSP00000245451	BMP4	6.6e-05	0.084	981	0
ENSP00000245457	PTGER2	6.81e-05	0.062	900	0.765127
ENSP00000245479	SOX9	6.54e-05	0.112	895	0.987669
ENSP00000245541	GGA3	2.11e-05	0.47	457	0
ENSP00000245543	ARMC7	6.47e-05	0.266	158	0.408707
ENSP00000245551	MIF4GD	8.24e-05	0.25	359	0.422179
ENSP00000245552	NT5C	2.12e-05	0.468	341	0.55728
ENSP00000245564	MSTO1	1.92e-05	0.988	0	0.274921
ENSP00000245620	LILRB3	4.12e-05	0.148	0	0.714892
ENSP00000245663	ZBTB46	2.5e-05	0.754	246	0.991056
ENSP00000245680	SLC35F5	1.41e-05	0.99	185	0.210305
ENSP00000245787	INSIG2	1.2e-05	0.952	206	0.474631
ENSP00000245796	PSD4	1.43e-05	0.954	152	0.344493
ENSP00000245810	PSPN	0.000124503	0.128	215	0.488228
ENSP00000245817	TNFSF9	2.61e-05	0.998	0	0.531357
ENSP00000245838	THOC2	2.42e-05	0.74	223	0.675297
ENSP00000245903	CD70	6.35e-05	0.962	0	0.630277
ENSP00000245907	C3	1.69e-05	0.698	903	0.798617
ENSP00000245908	SH2D3A	2.98e-05	0.998	0	0.418769
ENSP00000245919	FOSB	2.18e-05	0.466	468	0
ENSP00000245923	RTN2	1.27e-05	0.78	192	0.131196
ENSP00000245932	VASP	1.62e-05	0.946	394	0.742468
ENSP00000245934	SYMPK	1.87e-05	0.872	240	0.473367
ENSP00000245957	C20orf26	3.95e-05	0.308	157	0
ENSP00000245960	CDC25B	1.27e-05	0.99	0	0.821594
ENSP00000245983	GNRH2	5.4e-05	0.136	913	0.763345
ENSP00000246000	-	1.11e-05	0.974	0	0
ENSP00000246006	CD93	1.35e-05	0.702	301	0.491918
ENSP00000246012	CST8	2.07e-05	0.412	217	0.659727
ENSP00000246020	CSTL1	0.000117928	0.132	0	0.366884
ENSP00000246024	TMX4	1.61e-05	0.994	0	0.317408
ENSP00000246041	AP5S1	6.99e-05	0.712	240	0.269945
ENSP00000246069	DSTN	1.32e-05	0.734	433	0.646659
ENSP00000246070	LAMP5	1.18e-05	0.46	0	0.424808
ENSP00000246071	SNRPB2	1.14e-05	0.956	341	0.691357
ENSP00000246081	OTOR	1.86e-05	0.39	0	0.27797
ENSP00000246100	FAM110A	9.66e-05	0.212	306	0.319608
ENSP00000246104	SCRT2	0.000138716	0.042	345	0.91534
ENSP00000246112	TLE6	8.5e-05	0.076	612	0.947227
ENSP00000246115	S1PR4	4.59e-05	0.158	900	0.927431
ENSP00000246117	NCLN	1.71e-05	0.994	198	0.273102
ENSP00000246151	PITHD1	0.00011433	0.966	0	0.340038
ENSP00000246174	ARMCX5	1.84e-05	0.992	0	0.486743
ENSP00000246186	MMP24	1.16e-05	0.82	0	0.661924
ENSP00000246190	NECAB3	0.000102526	0.428	167	0.250793
ENSP00000246229	PLAGL2	1.78e-05	0.638	246	0.978316
ENSP00000246337	UROD	2.72e-05	0.164	311	0.485939
ENSP00000246421	SLC35E2	7.59e-05	0.892	0	0.242764
ENSP00000246515	SLURP1	1.75e-05	0.566	158	0.210499
ENSP00000246529	LRFN3	1.28e-05	0.972	242	0.923146
ENSP00000246532	IGFLR1	3.61e-05	0.458	234	0.420745
ENSP00000246533	CAPNS1	1.53e-05	0.902	199	0.250262
ENSP00000246549	FFAR2	5.27e-05	0.116	900	0.757915
ENSP00000246551	HCST	8.69e-05	0.882	256	0.489485
ENSP00000246553	FFAR1	8.43e-05	0.03	903	0.779486
ENSP00000246635	KRT13	1.59e-05	0.994	0	0.23629
ENSP00000246657	CCR7	2.14e-05	0.436	928	0.821186
ENSP00000246662	KRT9	1.46e-05	0.992	0	0.172845
ENSP00000246672	NR1D1	4.88e-05	0.366	913	0.881377
ENSP00000246747	ARL2	1.6e-05	1	0	0.284996
ENSP00000246785	BCL2L12	5.65e-05	0.718	167	0.216212
ENSP00000246792	RRAS	1.15e-05	0.742	715	0.943037
ENSP00000246794	PRRG2	0.000175704	0.148	157	0.183056
ENSP00000246802	GLTSCR2	1.13e-05	0.974	197	0.663348
ENSP00000246841	FLRT1	2.76e-05	0.162	242	0.760755
ENSP00000246868	SBDS	1.12e-05	0.986	161	0.523305
ENSP00000246895	STATH	1.6e-05	0.518	288	0.54703
ENSP00000246912	MLX	7.61e-05	0.114	346	0.899341
ENSP00000246914	WNK4	1.8e-05	0.914	206	0.273258
ENSP00000246949	DNASE1	2.82e-05	0.194	302	0.805903
ENSP00000247003	DDX49	1.84e-05	0.722	270	0.735246
ENSP00000247005	GDF1	0.000121547	0.114	502	0.975593
ENSP00000247020	SDF2	4.83e-05	0.23	188	0.225741
ENSP00000247026	NSRP1	2.64e-05	0.996	0	0.317898
ENSP00000247087	AHDC1	7.91e-05	0.998	0	0.341749
ENSP00000247138	SLC35A2	1.23e-05	0.764	253	0.196305
ENSP00000247153	CFP	2.46e-05	0.878	150	0.482603
ENSP00000247161	ELK1	1.84e-05	0.864	0	0.849827
ENSP00000247170	DAAM1	1.45e-05	0.764	209	0
ENSP00000247178	ATG14	4.59e-05	0.966	0	0.180764
ENSP00000247182	SIX1	0.000127631	0.048	956	0.971137
ENSP00000247191	DLGAP5	1.49e-05	0.968	469	0.637744
ENSP00000247194	L3HYPDH	0.000116783	0.224	159	0.326586
ENSP00000247219	TBPL2	1.05e-05	0.914	457	0
ENSP00000247225	SGPP1	3.96e-05	0.968	0	0.13279
ENSP00000247226	PLEKHG3	9.62e-05	0.79	156	0.348559
ENSP00000247270	EVI2A	2.37e-05	0.99	0	0.244282
ENSP00000247306	CTAG2	0.00765734	0.99	0	0.61925
ENSP00000247461	CANX	1.11e-05	0.96	291	0.553505
ENSP00000247470	PYCARD	1.57e-05	0.9	360	0.676225
ENSP00000247584	HIVEP3	1.86e-05	0.758	258	0.990269
ENSP00000247665	PHPT1	2.88e-05	0.796	157	0.254177
ENSP00000247668	TRAF2	1.59e-05	0.994	0	0.768101
ENSP00000247712	MPV17L2	4.31e-05	0.996	0	0
ENSP00000247829	TSPAN8	3.44e-05	0.19	270	0.544332
ENSP00000247843	YEATS4	1.06e-05	0.95	926	0.827031
ENSP00000247866	NDUFB2	4.11e-05	0.202	288	0.189929
ENSP00000247879	TAS2R3	7.85e-05	0.068	902	0.944002
ENSP00000247881	TAS2R4	4.69e-05	0.216	900	0.916362
ENSP00000247883	TAS2R5	7.27e-05	0.136	903	0.942001
ENSP00000247930	ZNF777	1.98e-05	0.71	246	0.996732
ENSP00000247933	IDUA	2.76e-05	0.552	220	0.297473
ENSP00000247956	ZNF317	1.91e-05	0.5	246	0.984765
ENSP00000247977	FBXL12	2.84e-05	0.988	154	0.236393
ENSP00000247986	KIF17	1.72e-05	0.878	433	0.671853
ENSP00000248041	CYP4F11	5.88e-05	0.322	422	0.5032
ENSP00000248070	EPS15L1	1.22e-05	0.96	408	0.33991
ENSP00000248071	KLF2	2.62e-05	0.418	494	0.943116
ENSP00000248076	F2RL3	4.76e-05	0.194	900	0.727715
ENSP00000248089	HCFC1R1	1.03e-05	0.914	0	0.561295
ENSP00000248098	HN1L	0.000197671	0.48	151	0.506084
ENSP00000248114	GFER	2.87e-05	0.258	440	0.534726
ENSP00000248121	SYNGR3	3.83e-05	0.972	152	0.277555
ENSP00000248139	RAB40C	1.34e-05	0.866	758	0.638317
ENSP00000248150	GNG13	2.39e-05	0.54	813	0.609757
ENSP00000248211	ZNF10	2.03e-05	0.724	246	0.995378
ENSP00000248244	TICAM1	1.11e-05	0.99	0	0.688324
ENSP00000248272	GAN	3.11e-05	0.776	202	0
ENSP00000248306	METTL25	2.97e-05	0.506	252	0.421179
ENSP00000248342	EIF3K	1.22e-05	0.972	226	0.740328
ENSP00000248378	EMC6	1.62e-05	0.99	0	0.348891
ENSP00000248420	CACTIN	2.44e-05	0.76	441	0.373739
ENSP00000248437	TUBA4A	1.16e-05	0.982	335	0.724895
ENSP00000248444	VIL1	1.92e-05	0.306	565	0.708759
ENSP00000248450	AAMP	1.15e-05	0.974	218	0.533847
ENSP00000248553	HSPB1	2.46e-05	0.56	846	0.830951
ENSP00000248564	GNG11	2.95e-05	0.374	813	0.531781
ENSP00000248566	SHFM1	4.87e-05	0.216	396	0.659189
ENSP00000248572	GNGT1	1.78e-05	0.444	813	0
ENSP00000248594	PTPN12	1.15e-05	0.954	183	0.700351
ENSP00000248598	FGL2	2.55e-05	0.526	171	0.294257
ENSP00000248673	ZFP36	2.99e-05	0.916	196	0
ENSP00000248706	RASL11B	1.18e-05	0.752	448	0.9455
ENSP00000248846	TUBGCP6	2.43e-05	0.648	223	0.531398
ENSP00000248901	CYTH4	1.15e-05	0.956	152	0.341498
ENSP00000248923	GGT1	1.6e-05	0.524	722	0.841124
ENSP00000248929	SGSM3	1.57e-05	0.852	206	0.355658
ENSP00000248933	SEZ6L	3.22e-05	0.38	242	0.343596
ENSP00000248935	GSTT1	1.76e-05	0.53	383	0
ENSP00000248948	VPREB3	1.08e-05	0.628	0	0.249544
ENSP00000248958	SDF2L1	4.09e-05	0.778	185	0.21891
ENSP00000248975	YWHAH	1.84e-05	0.454	266	0.982598
ENSP00000248984	C22orf24	2.47e-05	0.79	0	0
ENSP00000248996	GNAZ	1.72e-05	0.736	800	0
ENSP00000249005	A4GALT	5.18e-05	0.31	810	0.339947
ENSP00000249007	RFPL3	2.01e-05	0.908	654	0.799039
ENSP00000249014	CDC42EP1	0.00010194	0.998	0	0.39379
ENSP00000249016	MCHR1	4.06e-05	0.108	947	0.916774
ENSP00000249041	GALR3	6.59e-05	0.068	913	0.959314
ENSP00000249042	TST	1.41e-05	0.798	446	0.530382
ENSP00000249044	APOL5	1.25e-05	0.476	0	0.319258
ENSP00000249064	CCDC117	9.97e-05	0.856	181	0.431525
ENSP00000249066	APOL2	0.000105954	0.198	201	0.511229
ENSP00000249075	LIF	6.27e-05	0.116	512	0.780648
ENSP00000249079	C22orf23	1.1e-05	0.886	0	0.477322
ENSP00000249269	PMPCB	1.01e-05	0.968	315	0.394163
ENSP00000249284	TAS2R16	6.28e-05	0.226	931	0.912611
ENSP00000249299	NAA38	1.05e-05	0.98	286	0.291126
ENSP00000249330	VGF	5.99e-05	0.196	216	0.499881
ENSP00000249344	STRIP2	2.31e-05	0.818	164	0.197081
ENSP00000249356	DNAJB9	1.84e-05	0.968	168	0.3823
ENSP00000249373	SMO	6.91e-05	0.046	501	0.942994
ENSP00000249389	OPN1SW	0.000124939	0.12	468	0.532662
ENSP00000249396	SIRT2	1.81e-05	0.846	962	0.87361
ENSP00000249440	HOXD3	0.00018706	0.01	471	0.970033
ENSP00000249442	MTX2	0.000161482	0.106	489	0.306721
ENSP00000249504	HOXD11	0.000172828	0.006	748	0.979674
ENSP00000249598	GDF2	0.000111289	0.036	372	0
ENSP00000249601	ARHGAP22	2.96e-05	0.412	186	0.642465
ENSP00000249636	PIAS1	2.14e-05	0.824	300	0.91549
ENSP00000249647	SNAP23	2.68e-05	0.982	175	0.474606
ENSP00000249700	TMOD2	0.00010541	0.392	165	0.309513
ENSP00000249749	DLL4	6.56e-05	0.294	301	0.930142
ENSP00000249750	ALDH1A2	8.03e-05	0.04	982	0.677812
ENSP00000249806	CLN6	1.76e-05	0.992	0	0.215674
ENSP00000249822	ARPP19	4.76e-05	0.972	0	0.248158
ENSP00000249842	ISLR	2.42e-05	0.38	335	0.933905
ENSP00000249861	THAP10	0.000328945	0.656	171	0.421885
ENSP00000249883	AMOTL2	1.71e-05	0.988	0	0.195793
ENSP00000249887	CCRL1	0.000261203	0.044	163	0
ENSP00000249910	MBD4	3.61e-05	0.646	196	0.773191
ENSP00000249923	COPB1	2.74e-05	0.722	576	0.52406
ENSP00000250018	TPH1	3.77e-05	0.148	531	0.667581
ENSP00000250024	E2F8	1.87e-05	0.74	215	0.480081
ENSP00000250056	FAM64A	2.72e-05	0.804	216	0.303395
ENSP00000250076	ZNF232	1.87e-05	0.734	246	0.994232
ENSP00000250092	CD68	2.15e-05	0.296	650	0.827842
ENSP00000250101	TXNDC17	2.18e-05	0.988	0	0.206301
ENSP00000250111	ATP1B2	1.99e-05	0.892	158	0.186181
ENSP00000250113	FXR2	2.61e-05	0.942	709	0.545979
ENSP00000250124	MPDU1	3.42e-05	0.94	0	0.202999
ENSP00000250144	MMP28	6.97e-05	0.152	224	0
ENSP00000250151	CCL4	1.9e-05	0.694	395	0
ENSP00000250156	MRM1	2.86e-05	0.406	355	0
ENSP00000250160	WISP1	6.19e-05	0.25	183	0.569058
ENSP00000250237	QTRT1	2.31e-05	0.864	267	0.606218
ENSP00000250244	AP1M2	1.02e-05	0.976	493	0.463358
ENSP00000250263	ERI1	1.13e-05	0.994	0	0.550074
ENSP00000250340	CLEC11A	8.68e-05	0.992	0	0.398272
ENSP00000250378	CMA1	2.67e-05	0.23	658	0.68527
ENSP00000250405	BCL2L2	2.51e-05	0.8	497	0.693797
ENSP00000250416	PARP2	1.3e-05	0.97	282	0.667325
ENSP00000250448	FOXA1	4.81e-05	0.12	940	0
ENSP00000250454	EAPP	8.58e-05	0.956	0	0.259879
ENSP00000250457	EGLN3	1.86e-05	0.72	206	0.717193
ENSP00000250498	DAD1	3.94e-05	0.428	696	0.268138
ENSP00000250559	RAP1B	1.09e-05	0.854	448	0.938381
ENSP00000250615	AANAT	2.55e-05	0.22	457	0.304048
ENSP00000250617	ARHGEF6	2.2e-05	0.768	155	0.366525
ENSP00000250693	ART1	5.79e-05	0.232	185	0.316142
ENSP00000250825	VCY	1.87e-05	0.97	0	0.726124
ENSP00000250838	CDY2A	1.6e-05	0.344	398	0
ENSP00000250863	DAZL	2.04e-05	0.766	534	0.760683
ENSP00000250894	MAPK8IP3	1.41e-05	0.582	241	0.396416
ENSP00000250896	MKNK2	4.36e-05	0.976	0	0.654005
ENSP00000250916	KLF16	1.61e-05	0.728	250	0.975547
ENSP00000250971	INS	1.92e-05	0.448	995	0
ENSP00000250974	ABHD17A	5.14e-05	0.784	216	0.165804
ENSP00000251020	SALL1	0.000125949	0.062	853	0.965864
ENSP00000251038	ZC3H14	1.22e-05	0.94	742	0.668901
ENSP00000251047	LMAN1	2.16e-05	0.964	156	0.283374
ENSP00000251074	NUP37	1.95e-05	0.922	156	0.381253
ENSP00000251089	ANGEL1	1.47e-05	1	0	0.380042
ENSP00000251102	CNGB1	3.84e-05	0.218	414	0.762215
ENSP00000251119	ZFYVE26	1.15e-05	0.99	0	0.21309
ENSP00000251127	NALCN	2.02e-05	0.77	748	0.37273
ENSP00000251166	CORO7	4.47e-05	0.99	0	0.323454
ENSP00000251170	SEC14L5	1.16e-05	0.96	330	0.35244
ENSP00000251203	PBX4	0.000135457	0.06	741	0.942837
ENSP00000251250	DTWD1	0.000105197	0.994	0	0.583283
ENSP00000251269	ZNF221	2.35e-05	0.66	246	0.998786
ENSP00000251287	HCN2	6.39e-05	0.23	506	0.416916
ENSP00000251289	WDR18	3.37e-05	0.796	430	0.412468
ENSP00000251296	IGSF21	1.29e-05	0.878	0	0.36569
ENSP00000251303	SLX1A	2.34e-05	0.544	151	0.298593
ENSP00000251312	DHRS11	3.72e-05	0.524	345	0
ENSP00000251337	GNAT2	3.03e-05	0.136	987	0.988331
ENSP00000251343	KHNYN	0.000136835	0.99	0	0.492697
ENSP00000251363	CERS4	1.08e-05	0.872	903	0.509466
ENSP00000251372	LILRA1	4.12e-05	0.136	0	0.71752
ENSP00000251377	LILRA2	4.12e-05	0.148	0	0.717635
ENSP00000251390	LILRA3	4.12e-05	0.142	0	0
ENSP00000251453	RPS16	1.26e-05	0.892	578	0.817412
ENSP00000251472	MAST1	1.94e-05	0.916	216	0.5003
ENSP00000251496	NCAPG	1.26e-05	0.946	415	0.560043
ENSP00000251527	ESYT2	1.88e-05	0.986	164	0.327899
ENSP00000251547	FBXO44	2.44e-05	0.836	194	0.240645
ENSP00000251582	ADAMTS2	3.73e-05	0.158	326	0.603704
ENSP00000251588	NARFL	2.71e-05	0.5	235	0.262464
ENSP00000251595	HBA2	1.81e-05	0.792	482	0.387512
ENSP00000251607	TRNT1	2.32e-05	0.69	814	0.68669
ENSP00000251630	PDGFRL	1.27e-05	0.798	284	0.992924
ENSP00000251643	KRT12	4.88e-05	0.308	461	0.234641
ENSP00000251645	KRT31	2.53e-05	0.274	271	0.321992
ENSP00000251757	PHC1	0.000124331	0.286	432	0
ENSP00000251775	SNX4	1.2e-05	0.964	238	0.403582
ENSP00000251776	ROPN1B	1.22e-05	0.67	0	0.474623
ENSP00000251808	GRHL2	4.01e-05	0.104	267	0.762544
ENSP00000251810	RRM2B	1.24e-05	0.83	304	0.632289
ENSP00000251849	RAF1	1.21e-05	0.888	346	0.882594
ENSP00000251864	TDRD1	3.22e-05	0.89	563	0.452803
ENSP00000251900	SCML2	8.29e-05	0.144	534	0.878992
ENSP00000251921	NXPE1	0.000101042	0.2	198	0.34276
ENSP00000251968	TSG101	1.4e-05	0.836	377	0.425198
ENSP00000251973	CARD10	1.83e-05	0.596	549	0.434805
ENSP00000251993	KIAA0930	1.06e-05	0.994	0	0.259685
ENSP00000252029	TYMP	2.07e-05	0.994	0	0.547319
ENSP00000252034	ELN	0.00013986	0.15	566	0.26661
ENSP00000252037	FKBP6	1.44e-05	0.6	349	0.535909
ENSP00000252050	CUL9	2.01e-05	0.992	0	0.298488
ENSP00000252085	PCDHGA12	5.9e-05	0.266	167	0.303002
ENSP00000252087	PCDHGC5	2.7e-05	0.426	238	0.220488
ENSP00000252102	NDUFA2	1.5e-05	0.926	182	0.207249
ENSP00000252115	POLDIP3	1.44e-05	0.91	627	0.758857
ENSP00000252136	TRMT2A	1.64e-05	0.924	351	0.66899
ENSP00000252137	DGCR14	1.65e-05	0.894	165	0.385637
ENSP00000252172	MYH13	1.03e-05	0.948	613	0.532693
ENSP00000252211	ZKSCAN3	1.63e-05	0.824	246	0.991362
ENSP00000252242	KRT5	2.19e-05	0.538	357	0.810251
ENSP00000252244	KRT1	1.12e-05	0.966	215	0.615578
ENSP00000252245	KRT75	1.06e-05	1	0	0.178641
ENSP00000252250	KRT6C	1.18e-05	0.992	0	0.200003
ENSP00000252252	KRT6B	1.48e-05	0.968	159	0.214892
ENSP00000252318	GALNT8	5.28e-05	0.37	216	0.411363
ENSP00000252321	KCNA5	1.99e-05	0.54	903	0.458983
ENSP00000252329	PSMG3	4.36e-05	0.976	0	0.231291
ENSP00000252338	FAM155B	1.58e-05	0.51	216	0.508627
ENSP00000252445	ELOF1	4.11e-05	0.812	158	0.422368
ENSP00000252453	C19orf80	2.51e-05	0.376	158	0.330013
ENSP00000252455	PRKCSH	3.27e-05	0.756	200	0
ENSP00000252463	ZSCAN10	2.57e-05	0.402	905	0.990232
ENSP00000252483	PVRL2	1.91e-05	0.992	0	0.232678
ENSP00000252486	APOE	2.09e-05	0.418	650	0.903496
ENSP00000252505	ALLC	2.93e-05	0.162	629	0.532821
ENSP00000252506	GADD45G	1.58e-05	0.626	152	0.723875
ENSP00000252512	XPO7	5.06e-05	0.74	192	0.277823
ENSP00000252519	ACE2	2.06e-05	0.52	212	0.529158
ENSP00000252530	FAM98C	5.08e-05	0.456	303	0.690901
ENSP00000252542	SAFB2	2.32e-05	0.858	158	0.630782
ENSP00000252575	NCAN	2.33e-05	0.368	242	0.48808
ENSP00000252595	SLC27A1	1.64e-05	0.872	188	0.266709
ENSP00000252599	COLGALT1	0.000327626	0.958	0	0.329459
ENSP00000252622	LSM7	1.21e-05	0.96	177	0.640918
ENSP00000252655	RSPH3	3.21e-05	0.99	0	0.347376
ENSP00000252660	MAS1	1.38e-05	0.614	159	0.360128
ENSP00000252669	ACSBG2	1.34e-05	0.948	163	0
ENSP00000252674	MLLT1	3.16e-05	0.188	648	0.90774
ENSP00000252675	FUT5	2.75e-05	0.458	166	0.608006
ENSP00000252677	BMP15	6.94e-05	0.058	464	0.960414
ENSP00000252699	ACTN4	1.87e-05	0.892	589	0.593315
ENSP00000252723	EPO	3.46e-05	0.686	909	0.820996
ENSP00000252725	ARPC1B	2.13e-05	0.886	409	0.332017
ENSP00000252744	ZSWIM6	4.57e-05	0.312	358	0.351205
ENSP00000252771	FCHO1	2.33e-05	0.628	355	0.300411
ENSP00000252785	SCO2	1.5e-05	0.9	173	0.393069
ENSP00000252797	ZNF764	2.62e-05	0.716	246	0.991663
ENSP00000252799	ZNF747	2.71e-05	0.844	246	0.996709
ENSP00000252804	PXDN	2.37e-05	0.526	198	0.185925
ENSP00000252809	GDF15	6.11e-05	0.17	827	0.957661
ENSP00000252818	JUND	2.64e-05	0.19	749	0
ENSP00000252826	TRPM4	3.21e-05	0.638	200	0.379186
ENSP00000252840	ZNF557	2e-05	0.644	246	0.998347
ENSP00000252854	OLFM1	1.33e-05	0.558	360	0.380119
ENSP00000252891	NUMBL	3.51e-05	0.112	440	0.833145
ENSP00000252898	TNNI2	1.74e-05	0.54	579	0.222744
ENSP00000252934	ATXN10	1.7e-05	0.994	0	0.220431
ENSP00000252936	TUBGCP2	2.03e-05	0.772	193	0.559959
ENSP00000252939	CALY	0.000132792	0.086	712	0.294637
ENSP00000252945	CYP2E1	1.23e-05	0.948	331	0.582439
ENSP00000252951	HBZ	1.72e-05	0.896	158	0.52141
ENSP00000252971	MNX1	0.000100224	0.08	719	0.992169
ENSP00000252979	ZNF337	1.69e-05	0.75	246	0.996302
ENSP00000252992	CEP85	2.78e-05	0.992	0	0.388667
ENSP00000252996	TAF4	2.53e-05	0.938	214	0.923022
ENSP00000252997	GATA5	4.3e-05	0.036	970	0
ENSP00000252999	LAMA5	2.63e-05	0.756	228	0.604546
ENSP00000253004	ASS1	1.22e-05	0.946	196	0.460975
ENSP00000253008	PRDM12	0.000288098	0.018	210	0.5732
ENSP00000253024	TRIM28	1.85e-05	0.934	889	0.898104
ENSP00000253031	YIPF2	5.87e-05	0.91	158	0.236153
ENSP00000253039	EIF2S3	1.24e-05	0.994	199	0.777754
ENSP00000253047	TMEM160	0.000126297	0.33	470	0.35197
ENSP00000253048	ZC3H4	4.02e-05	0.758	155	0.528976
ENSP00000253055	MAP3K10	1.13e-05	0.808	642	0.994861
ENSP00000253063	SESN2	1.42e-05	0.992	241	0.556876
ENSP00000253079	CCDC62	3.96e-05	0.418	150	0.184704
ENSP00000253108	EIF3G	1.19e-05	0.976	158	0.740945
ENSP00000253109	ANGPTL6	7.84e-05	0.252	237	0.394134
ENSP00000253115	ZNF426	2.05e-05	0.872	246	0.993345
ENSP00000253122	SLC6A8	3.12e-05	0.236	342	0.410573
ENSP00000253144	ZNF331	1.8e-05	0.604	359	0.987413
ENSP00000253159	ZNF236	2.34e-05	0.324	586	0.99009
ENSP00000253188	SLC7A10	2.67e-05	0.672	704	0.762657
ENSP00000253193	LRP3	0.000104736	0.144	169	0.153391
ENSP00000253233	C12orf65	1.4e-05	0.92	307	0.746734
ENSP00000253247	NOL11	2.24e-05	0.502	214	0.353784
ENSP00000253262	NUTMF	2.82e-05	0.322	0	0
ENSP00000253270	SLC35D2	2.62e-05	0.338	501	0.24728
ENSP00000253303	RGN	1.68e-05	0.692	373	0.464299
ENSP00000253332	AKAP12	3.68e-05	0.544	207	0.592865
ENSP00000253339	LATS1	1.47e-05	0.498	490	0.985939
ENSP00000253363	RBM39	1.66e-05	0.968	173	0.718972
ENSP00000253392	EDA2R	2.04e-05	0.608	198	0.815363
ENSP00000253401	ARHGEF9	2.96e-05	0.45	201	0.291468
ENSP00000253407	C1QL1	0.000255191	0.854	0	0.402391
ENSP00000253408	GFAP	3.54e-05	0.27	539	0.859839
ENSP00000253410	HIGD1B	1.9e-05	0.532	158	0.272159
ENSP00000253457	EMC8	2.06e-05	0.996	0	0.344888
ENSP00000253458	GSE1	7.69e-05	0.9	572	0.335352
ENSP00000253461	C16orf95	2.54e-05	0.276	0	0.418598
ENSP00000253462	GINS2	1.41e-05	0.916	243	0.509886
ENSP00000253496	F12	2.25e-05	0.536	282	0.509911
ENSP00000253571	RLIM	3.03e-05	0.592	937	0.615128
ENSP00000253577	ABCB7	1.39e-05	0.97	150	0.093822
ENSP00000253669	HAUS8	4.61e-05	0.99	0	0.33999
ENSP00000253673	EMR3	6.44e-05	0.084	430	0
ENSP00000253686	MRPS25	1.02e-05	0.996	0	0.379127
ENSP00000253693	CAPN7	1.59e-05	0.782	266	0
ENSP00000253727	NR1H2	2.39e-05	0.356	903	0.84755
ENSP00000253754	PDLIM4	1.49e-05	0.798	278	0.653004
ENSP00000253778	GFPT2	1.31e-05	0.914	203	0.543974
ENSP00000253788	RPL27	1.61e-05	0.826	223	0.783333
ENSP00000253794	VPS25	2.72e-05	0.956	197	0.348181
ENSP00000253796	RAMP2	2.69e-05	0.336	0	0.439669
ENSP00000253799	AOC2	2.32e-05	0.236	416	0.59489
ENSP00000253801	G6PC	4.01e-05	0.312	208	0.245771
ENSP00000253807	PCDHAC1	0.000242215	0.046	381	0.278779
ENSP00000253812	PCDHGA3	0.000114071	0.1	320	0.386272
ENSP00000253814	NDFIP1	1.03e-05	0.994	0	0.166601
ENSP00000253925	PPFIA1	1.76e-05	0.702	188	0.427251
ENSP00000253934	TMEM204	0.000197671	0.042	459	0.58301
ENSP00000253968	BARX1	0.000247401	0.082	778	0.900973
ENSP00000254029	WDR44	9.81e-05	0.844	628	0.246488
ENSP00000254035	CKMT2	2.2e-05	0.776	222	0.161432
ENSP00000254043	KRT15	3.29e-05	0.542	275	0.568724
ENSP00000254051	TNS4	4.38e-05	0.992	0	0.267489
ENSP00000254066	RARA	2.85e-05	0.264	928	0.964635
ENSP00000254072	KRTAP9-8	1.02e-05	0.374	0	0.530066
ENSP00000254079	PPP1R1B	6.33e-05	0.104	878	0.72361
ENSP00000254090	FMO5	1.13e-05	0.698	210	0.338177
ENSP00000254101	PRKAB2	1.51e-05	0.604	171	0
ENSP00000254108	FUS	1.74e-05	0.726	282	0.842465
ENSP00000254122	FSHB	0.000102231	0.02	832	0.877607
ENSP00000254166	ZNF132	1.68e-05	0.788	246	0.98996
ENSP00000254181	USP29	2.67e-05	0.556	224	0.271549
ENSP00000254190	CHSY1	5e-05	0.846	200	0.192183
ENSP00000254227	NR0B2	2.67e-05	0.334	906	0.833354
ENSP00000254231	LIN28A	4.68e-05	0.188	937	0.857662
ENSP00000254235	ADCY7	3.17e-05	0.142	918	0.974896
ENSP00000254250	THAP1	5.08e-05	0.24	560	0.40484
ENSP00000254260	RHPN2	1.44e-05	0.766	265	0
ENSP00000254301	LGALS3	2.37e-05	0.306	369	0.841108
ENSP00000254321	ZNF700	1.79e-05	0.738	246	0.997463
ENSP00000254322	DNAJB1	3.21e-05	0.32	212	0.615823
ENSP00000254325	RFX1	2.44e-05	0.206	345	0.939296
ENSP00000254336	C19orf57	1.04e-05	0.806	0	0.385481
ENSP00000254337	DCAF15	0.00011833	0.198	165	0.559429
ENSP00000254351	SDC1	2.38e-05	0.418	925	0.809596
ENSP00000254466	GAS2L2	2.02e-05	0.554	316	0
ENSP00000254480	SMARCC1	2.22e-05	0.882	959	0.904243
ENSP00000254488	SLC6A11	4.19e-05	0.184	535	0.411306
ENSP00000254508	NUP210	1.09e-05	0.996	0	0.521744
ENSP00000254521	HSD17B7	1.28e-05	0.994	440	0.467344
ENSP00000254528	EMILIN2	7.84e-05	0.296	150	0.552585
ENSP00000254579	DNHD1	4.65e-05	0.53	201	0.521605
ENSP00000254584	ARFIP2	1.66e-05	0.91	206	0.392496
ENSP00000254605	RRP8	1.87e-05	0.352	390	0.622089
ENSP00000254624	EFR3A	0.0001471	0.95	0	0.468951
ENSP00000254627	OC90	6.74e-05	0.152	179	0
ENSP00000254657	PER2	4.01e-05	0.622	386	0.898341
ENSP00000254661	RAMP1	0.000137897	0.094	329	0.502179
ENSP00000254663	SCLY	2.09e-05	0.762	195	0.423585
ENSP00000254691	CARD6	9.46e-05	0.998	0	0.278626
ENSP00000254695	RAP1GAP2	1.35e-05	0.986	177	0.249017
ENSP00000254722	SERPINF1	3.27e-05	0.748	211	0.794497
ENSP00000254730	EEFSEC	2.44e-05	0.838	158	0.491765
ENSP00000254742	TMEM128	0.000196354	0.606	161	0.354627
ENSP00000254759	COQ3	1.81e-05	0.908	150	0.275123
ENSP00000254765	POPDC3	3.29e-05	0.452	212	0.389458
ENSP00000254770	LANCL2	6.58e-05	0.706	153	0.264762
ENSP00000254799	GRSF1	5.06e-05	0.974	0	0.426741
ENSP00000254801	IGJ	3.33e-05	0.572	869	0
ENSP00000254806	WBP2	3.21e-05	0.996	0	0.203951
ENSP00000254816	TRIM47	4.5e-05	0.998	0	0.276423
ENSP00000254835	ANKRD20A3	2.54e-05	0.496	202	0
ENSP00000254846	KDM6B	1.71e-05	0.35	526	0
ENSP00000254854	GUCY2D	2.47e-05	0.148	721	0.988798
ENSP00000254868	CLEC10A	3.21e-05	0.148	313	0.44371
ENSP00000254878	HRSP12	1.37e-05	0.998	0	0.160811
ENSP00000254900	BRD8	3.39e-05	0.99	0	0.816614
ENSP00000254901	REEP2	2.28e-05	0.5	567	0.17858
ENSP00000254928	ERAL1	1.91e-05	0.86	216	0.392184
ENSP00000254940	NIP7	1.11e-05	0.984	206	0.756993
ENSP00000254942	TERF2	2.04e-05	0.982	163	0.487215
ENSP00000254950	VPS4A	1.25e-05	0.946	186	0.383767
ENSP00000254958	JAG1	4.66e-05	0.152	667	0.965089
ENSP00000254976	SNAP25	4.7e-05	0.406	943	0.400675
ENSP00000254998	NXT1	7.86e-05	0.892	700	0.582137
ENSP00000255006	RIN2	0.000110223	0.938	0	0.208237
ENSP00000255008	SSTR4	6.66e-05	0.058	998	0.935755
ENSP00000255040	APCS	1.93e-05	0.614	165	0.439914
ENSP00000255078	IGHMBP2	1.21e-05	0.706	180	0.667711
ENSP00000255108	DPH2	1.9e-05	0.882	165	0.535135
ENSP00000255120	NASP	1.11e-05	0.978	150	0.473975
ENSP00000255129	ZNF334	1.94e-05	0.692	246	0.997392
ENSP00000255152	ZSWIM3	8.26e-05	0.228	267	0.461139
ENSP00000255174	C20orf111	0.000160418	0.752	157	0
ENSP00000255175	SERINC3	2.37e-05	0.616	306	0.559564
ENSP00000255189	DMGDH	2.18e-05	0.352	281	0.39208
ENSP00000255192	BHMT2	2.6e-05	0.376	351	0.230815
ENSP00000255194	AP3B1	1.1e-05	0.95	343	0.516375
ENSP00000255198	ZBED3	0.00016412	0.872	165	0.235643
ENSP00000255224	SYT4	3.19e-05	0.358	576	0.369395
ENSP00000255262	NMUR2	4.38e-05	0.084	910	0.933272
ENSP00000255266	PDE6A	2.15e-05	0.19	829	0.987508
ENSP00000255304	USPL1	3.52e-05	0.436	191	0.318303
ENSP00000255305	XPO4	0.000108717	0.834	214	0.341297
ENSP00000255324	RNF17	4.1e-05	0.41	589	0.408623
ENSP00000255380	CHRM3	3.04e-05	0.18	933	0.808657
ENSP00000255389	PEMT	1.13e-05	0.986	181	0.265767
ENSP00000255409	CHI3L1	2.73e-05	0.234	311	0.641918
ENSP00000255416	MYBPH	5.54e-05	0.972	242	0.123075
ENSP00000255448	DCLK1	1.02e-05	0.796	209	0.990331
ENSP00000255465	CCNA1	1.67e-05	0.768	264	0.900233
ENSP00000255499	RNF128	2.85e-05	0.838	313	0.741735
ENSP00000255608	BTBD2	1.17e-05	0.998	0	0.228212
ENSP00000255613	SUV420H2	1.52e-05	0.996	0	0.353825
ENSP00000255641	CSNK1G2	1.86e-05	0.766	214	0.4292
ENSP00000255674	RTTN	0.000110612	0.432	489	0.360268
ENSP00000255688	RARRES3	2.83e-05	0.994	0	0.673604
ENSP00000255746	ZNF679	2.28e-05	0.68	246	0.998328
ENSP00000255759	FOPNL	0.000124949	0.836	150	0.306572
ENSP00000255784	CCDC134	1.6e-05	0.988	0	0.284353
ENSP00000255858	SEC14L4	3.97e-05	0.802	386	0.312633
ENSP00000255945	GIMAP4	2.13e-05	0.986	0	0.416675
ENSP00000255977	MKRN1	1.7e-05	0.996	255	0.312966
ENSP00000255992	KRBA1	0.0011702	0.018	499	0
ENSP00000256010	NTS	2.78e-05	0.238	989	0.887586
ENSP00000256015	BTG1	3.23e-05	0.992	0	0.524644
ENSP00000256031	ATP13A3	2.85e-05	0.728	707	0.168168
ENSP00000256078	KRAS	1.92e-05	0.332	457	0.90081
ENSP00000256079	IPO8	1.26e-05	0.87	153	0
ENSP00000256104	FABP4	2.53e-05	0.226	227	0.772436
ENSP00000256119	CA1	2.53e-05	0.156	414	0
ENSP00000256151	CCDC59	0.000149529	0.29	288	0.379649
ENSP00000256186	MICALCL	0.000105755	0.73	167	0.39041
ENSP00000256190	SBF2	1.48e-05	0.974	392	0.289821
ENSP00000256194	MICAL2	1.55e-05	0.916	766	0.201585
ENSP00000256196	RRAS2	1.22e-05	0.708	706	0.953931
ENSP00000256246	TEX15	5.16e-05	0.31	512	0.325659
ENSP00000256255	TMEM66	7.91e-05	0.624	167	0
ENSP00000256257	RNF122	4.18e-05	0.956	161	0.35304
ENSP00000256319	C14orf1	1.68e-05	0.992	368	0.330271
ENSP00000256339	UNC79	2.4e-05	0.982	242	0.366178
ENSP00000256362	VRTN	0.000385198	0.056	150	0.524837
ENSP00000256366	SYNJ2BP	9.88e-05	0.692	800	0.341013
ENSP00000256379	MED6	3.86e-05	0.344	173	0.848347
ENSP00000256383	EIF2S1	1.93e-05	0.914	656	0.690909
ENSP00000256389	ADAM20	1.02e-05	0.624	0	0.238622
ENSP00000256404	PEBP4	1.59e-05	0.662	213	0.212016
ENSP00000256412	ADAMDEC1	3.61e-05	0.424	189	0.22514
ENSP00000256429	MBD2	3.31e-05	0.906	874	0.832433
ENSP00000256433	IER3IP1	3.69e-05	0.984	0	0
ENSP00000256441	MRPS36	4.8e-05	0.758	378	0.373871
ENSP00000256443	CDK7	1.82e-05	0.452	360	0.852525
ENSP00000256447	CD180	1.3e-05	0.94	195	0.737277
ENSP00000256452	IL5RA	2.83e-05	0.386	270	0.537984
ENSP00000256460	CAMK1	1.2e-05	0.872	239	0
ENSP00000256474	VHL	2.37e-05	0.888	185	0.878172
ENSP00000256495	BHLHE40	3.81e-05	0.302	686	0.960186
ENSP00000256496	ARL8B	4.43e-05	0.974	0	0.19515
ENSP00000256497	EDEM1	2.61e-05	0.964	398	0.447135
ENSP00000256509	CHL1	3.57e-05	0.184	509	0.835952
ENSP00000256538	ATPBD4	7.88e-05	0.696	153	0
ENSP00000256544	KATNBL1	0.000684387	0.838	0	0.361439
ENSP00000256545	EMC7	2.36e-05	0.992	0	0.259784
ENSP00000256578	AMPD2	2.29e-05	0.85	175	0.263735
ENSP00000256592	TSHB	9.56e-05	0.052	840	0.704838
ENSP00000256593	GSTM5	4.29e-05	0.558	216	0.186182
ENSP00000256594	GSTM3	1.31e-05	0.99	0	0.303788
ENSP00000256637	SORT1	2.75e-05	0.976	0	0.208958
ENSP00000256644	LAMTOR5	1.67e-05	0.996	0	0.448719
ENSP00000256646	NOTCH2	4.62e-05	0.126	822	0.984105
ENSP00000256649	TRIM45	0.000116174	0.83	379	0.257836
ENSP00000256689	SLC38A2	3.48e-05	0.956	464	0.521989
ENSP00000256707	KIDINS220	2.89e-05	0.318	260	0.800502
ENSP00000256720	LPIN1	2.21e-05	0.216	393	0.971466
ENSP00000256722	CMPK2	1.33e-05	0.868	367	0.548476
ENSP00000256737	ANO3	3.73e-05	0.378	183	0.232038
ENSP00000256759	FST	6.08e-05	0.14	866	0.956575
ENSP00000256797	ERN2	1.08e-05	0.944	164	0.990915
ENSP00000256854	NARS	1.07e-05	0.988	624	0.90471
ENSP00000256857	GRP	2.62e-05	0.27	986	0.901813
ENSP00000256861	ITIH5	3.73e-05	0.192	381	0
ENSP00000256897	CCNH	1.92e-05	0.418	400	0.831581
ENSP00000256906	HRH4	3.14e-05	0.206	922	0.917727
ENSP00000256925	CABLES1	2.25e-05	0.578	152	0.203818
ENSP00000256951	EMP1	1.9e-05	0.606	174	0.277089
ENSP00000256953	RERG	1.36e-05	0.676	448	0.945461
ENSP00000256969	C12orf39	1.06e-05	0.488	341	0
ENSP00000256997	ACP2	2.8e-05	0.84	193	0.174393
ENSP00000256999	FOLH1	1.39e-05	0.93	178	0.320313
ENSP00000257013	FAM127A	3.24e-05	0.996	0	0.444682
ENSP00000257068	MTNR1B	3.78e-05	0.398	916	0.856247
ENSP00000257118	PHC2	2.6e-05	0.626	196	0.642338
ENSP00000257177	ZCCHC11	2.02e-05	0.984	0	0.664586
ENSP00000257181	PRPF38A	3.98e-05	0.974	0	0.552054
ENSP00000257189	DSG3	1.65e-05	0.596	563	0.325146
ENSP00000257192	DSG1	1.58e-05	0.904	516	0.272949
ENSP00000257198	DSC1	3.14e-05	0.808	193	0.221197
ENSP00000257209	FHOD3	1.85e-05	0.56	153	0.202433
ENSP00000257245	TIMM10	1.09e-05	0.948	196	0.610897
ENSP00000257248	GIF	2.97e-05	0.21	262	0.556884
ENSP00000257254	APLNR	2.63e-05	0.282	918	0.849296
ENSP00000257262	TMEM258	1.59e-05	0.99	0	0.349506
ENSP00000257267	C5AR2	1.21e-05	0.44	0	0
ENSP00000257287	CEP135	1.29e-05	0.996	0	0.476551
ENSP00000257290	PDGFRA	1.6e-05	0.444	871	0.951095
ENSP00000257312	DZIP1	4e-05	0.294	248	0.300915
ENSP00000257336	BIVM	0.000204991	0.852	0	0.480107
ENSP00000257347	CARS2	1.41e-05	0.846	286	0.769799
ENSP00000257430	APC	1.93e-05	0.74	619	0.783063
ENSP00000257497	ANXA1	2.04e-05	0.462	903	0.818014
ENSP00000257527	ADAM19	2.54e-05	0.81	181	0.380831
ENSP00000257548	USP30	1.4e-05	0.926	436	0.543996
ENSP00000257552	MSI1	6.14e-05	0.188	418	0.592687
ENSP00000257555	HNF1A	4.22e-05	0.102	980	0.907251
ENSP00000257566	TBX3	9.23e-05	0.09	867	0.979457
ENSP00000257570	OASL	1.11e-05	0.716	361	0.868859
ENSP00000257572	HRK	0.000104468	0.87	0	0.197978
ENSP00000257575	RNFT2	1.52e-05	0.858	667	0.555646
ENSP00000257600	DTX1	4.89e-05	0.322	270	0.876564
ENSP00000257604	TRAFD1	2.4e-05	0.994	0	0.306992
ENSP00000257622	POM121	1.85e-05	0.992	0	0
ENSP00000257627	OCM2	1.39e-05	0.71	508	0
ENSP00000257632	UPK3B	3.66e-05	0.352	234	0.641391
ENSP00000257663	TMEM60	2.72e-05	0.388	264	0.372246
ENSP00000257694	PNPLA8	3.49e-05	0.792	152	0.201523
ENSP00000257696	HILPDA	2.19e-05	0.99	0	0.295399
ENSP00000257700	RINT1	6.16e-05	0.216	235	0.313871
ENSP00000257724	MDFIC	2.88e-05	0.44	288	0.424801
ENSP00000257745	MLL5	1.77e-05	0.834	341	0
ENSP00000257749	BACH2	4.44e-05	0.5	897	0.81208
ENSP00000257770	NT5E	1.77e-05	0.494	286	0.724953
ENSP00000257776	MRAP2	1.03e-05	0.584	0	0.299766
ENSP00000257787	AKIRIN2	8.63e-05	0.926	408	0.253771
ENSP00000257789	ORC3	1.02e-05	0.988	0	0.402511
ENSP00000257818	LMO2	4.01e-05	0.228	978	0.979331
ENSP00000257836	PRRG4	1.03e-05	0.632	0	0.279815
ENSP00000257857	CD63	1.33e-05	0.918	384	0.58526
ENSP00000257860	PRPH	0.000119274	0.602	816	0.253031
ENSP00000257861	AVIL	3.25e-05	0.556	329	0.487649
ENSP00000257863	AMHR2	6.54e-05	0.074	851	0.865434
ENSP00000257867	LACRT	5.29e-05	0.618	159	0.336267
ENSP00000257868	GDF11	0.000146109	0.016	881	0.97787
ENSP00000257894	FAM186B	0.00040563	0.086	151	0.513375
ENSP00000257895	RDH5	5.92e-05	0.41	418	0.443248
ENSP00000257901	KRT85	2.38e-05	0.996	0	0.326588
ENSP00000257904	CDK4	1.33e-05	0.674	993	0
ENSP00000257909	TROAP	6.45e-05	0.958	167	0.399931
ENSP00000257910	TSPAN31	8.87e-05	0.674	625	0.284364
ENSP00000257915	TFCP2	2.82e-05	0.204	810	0.813748
ENSP00000257934	ESPL1	1.31e-05	0.822	209	0.564662
ENSP00000257951	KRT84	1.08e-05	0.994	0	0.152153
ENSP00000257979	MIP	1.64e-05	0.492	381	0.17937
ENSP00000257981	KCNH3	3.92e-05	0.278	921	0.25189
ENSP00000258034	TAAR5	0.000125076	0.014	755	0.377484
ENSP00000258042	NMBR	4.83e-05	0.216	927	0.770962
ENSP00000258052	SMPD2	1.99e-05	0.822	195	0.341648
ENSP00000258062	REPS1	3.36e-05	0.992	0	0.288141
ENSP00000258083	PRADC1	8.01e-05	0.988	0	0.442256
ENSP00000258098	RAB11FIP5	1.72e-05	0.99	0	0.143816
ENSP00000258105	MRPL53	3.74e-05	0.994	0	0.402174
ENSP00000258106	EMX1	0.000198669	0.06	768	0.955532
ENSP00000258111	KCNMB4	4.79e-05	0.238	264	0.316121
ENSP00000258145	GNS	2.67e-05	0.498	359	0.445139
ENSP00000258168	BCMO1	4.61e-05	0.19	392	0
ENSP00000258169	MPHOSPH6	2.57e-05	0.912	174	0.27103
ENSP00000258180	KIAA0513	0.000145816	0.078	242	0.554745
ENSP00000258198	DYNC1LI2	5.53e-05	0.904	570	0.359326
ENSP00000258201	FHOD1	3.78e-05	0.796	153	0.530258
ENSP00000258214	CCDC102A	0.000234422	0.082	159	0.285295
ENSP00000258229	PCNXL2	1.16e-05	0.584	418	0.331431
ENSP00000258243	URB2	3.21e-05	0.992	0	0.414618
ENSP00000258281	TAF5L	3.96e-05	0.556	345	0.766693
ENSP00000258302	RGS8	4.86e-05	0.178	564	0.358527
ENSP00000258317	NPL	1.31e-05	0.638	407	0.36042
ENSP00000258341	LAMC1	8.43e-05	0.432	891	0.59777
ENSP00000258349	RC3H1	4.43e-05	0.938	213	0.423469
ENSP00000258381	SP110	1.11e-05	0.994	0	0.584922
ENSP00000258383	MRPL44	1.74e-05	0.996	0	0.326777
ENSP00000258385	CHRND	1.14e-05	0.696	160	0.210774
ENSP00000258390	DOCK10	1.43e-05	0.988	0	0.217822
ENSP00000258398	TTLL4	3.63e-05	0.758	167	0.298239
ENSP00000258399	USP37	3.85e-05	0.28	224	0.304681
ENSP00000258400	HTR2B	4.89e-05	0.082	924	0.837275
ENSP00000258411	WNT10A	9.27e-05	0.022	912	0.981867
ENSP00000258412	TMBIM1	2.28e-05	0.756	171	0.615659
ENSP00000258415	CYP27A1	1.72e-05	0.866	308	0.506665
ENSP00000258416	EIF4E2	1.23e-05	0.958	219	0.713394
ENSP00000258417	ARMC9	3.13e-05	0.99	0	0.397803
ENSP00000258418	CAB39	1.44e-05	0.936	901	0.399706
ENSP00000258424	COX5B	1.18e-05	0.962	237	0.388445
ENSP00000258428	REV1	1.74e-05	0.8	242	0.483673
ENSP00000258436	MFSD9	1.64e-05	0.454	282	0.24212
ENSP00000258439	TMEM127	0.000119572	0.956	0	0.230366
ENSP00000258443	EDAR	1.88e-05	0.556	227	0.83203
ENSP00000258449	TGFBRAP1	1.49e-05	0.976	328	0.402406
ENSP00000258456	GPR45	0.000217082	0.076	369	0.409465
ENSP00000258457	C2orf49	4.7e-05	0.256	217	0.183154
ENSP00000258484	EPC2	2.09e-05	0.874	722	0.823062
ENSP00000258494	ALDH1L2	1.03e-05	0.93	201	0.317484
ENSP00000258499	USP44	1.88e-05	0.898	229	0.622029
ENSP00000258526	PLXNC1	3.66e-05	0.388	201	0.369915
ENSP00000258538	SLC41A2	2.13e-05	0.996	0	0.249442
ENSP00000258646	RCBTB1	4.78e-05	0.208	325	0.805973
ENSP00000258648	MED4	2.85e-05	0.986	0	0.84558
ENSP00000258654	COG3	2.24e-05	0.914	380	0.497383
ENSP00000258711	CHST12	6.07e-05	0.636	181	0.225531
ENSP00000258729	IGF2BP3	2.65e-05	0.958	178	0.604741
ENSP00000258739	KDELR2	2.24e-05	0.978	439	0.31165
ENSP00000258742	NUPL2	1.6e-05	0.932	161	0.354878
ENSP00000258743	IL6	2.3e-05	0.384	504	0
ENSP00000258761	BZW2	5.87e-05	0.972	0	0.251838
ENSP00000258770	TBRG4	0.000156831	0.178	206	0.335643
ENSP00000258772	DDX56	2.06e-05	0.728	260	0.731797
ENSP00000258774	HUS1	2.9e-05	0.622	222	0.504153
ENSP00000258776	C7orf69	2.21e-05	0.312	0	0
ENSP00000258787	MYO1G	1.19e-05	0.908	749	0.550267
ENSP00000258796	TTYH3	8.04e-05	0.89	550	0.44464
ENSP00000258821	TTC5	0.000105583	0.746	207	0.340612
ENSP00000258829	NKX2-8	0.000178056	0.024	602	0.961089
ENSP00000258873	ACSBG1	1.06e-05	0.962	163	0.207838
ENSP00000258874	MTHFS	1.42e-05	0.998	0	0.219391
ENSP00000258884	ABHD17C	1.68e-05	0.99	0	0.181045
ENSP00000258886	IREB2	2.04e-05	0.854	478	0.506915
ENSP00000258888	ALPK3	3.3e-05	0.436	241	0.167487
ENSP00000258930	CIB2	1.06e-05	0.838	576	0.518242
ENSP00000258962	SRSF1	1.89e-05	0.746	381	0.697549
ENSP00000258991	TEX2	7.17e-05	0.214	241	0.213898
ENSP00000259006	LIMD2	8.5e-05	0.52	167	0.553017
ENSP00000259008	BRIP1	1.35e-05	0.92	265	0.538508
ENSP00000259021	KAT7	1.33e-05	0.744	616	0
ENSP00000259037	NDUFB5	1e-05	0.996	193	0.201718
ENSP00000259050	2021-03-07	4.84e-05	0.15	418	0.459781
ENSP00000259056	GALNT5	2.82e-05	0.994	0	0.560085
ENSP00000259075	TANK	1.37e-05	0.99	0	0.759236
ENSP00000259089	BLK	1.34e-05	0.766	319	0.99207
ENSP00000259119	SKIL	2.08e-05	0.76	200	0.896147
ENSP00000259154	KCTD3	2.75e-05	0.816	438	0.178719
ENSP00000259199	CBWD2	1.44e-05	0.996	0	0.237004
ENSP00000259206	IL1RN	1.48e-05	0.558	227	0.674564
ENSP00000259212	IL36RN	1.12e-05	0.588	0	0.200219
ENSP00000259216	CFC1	0.000105819	0.036	427	0.624142
ENSP00000259229	CCDC115	0.000101534	0.994	0	0.437476
ENSP00000259241	HS6ST1	6.72e-05	0.074	559	0.387387
ENSP00000259254	GYPC	2.01e-05	0.548	159	0.280782
ENSP00000259271	GAD2	7.53e-05	0.124	965	0.742764
ENSP00000259324	LRRC8A	1.32e-05	0.982	225	0.880831
ENSP00000259339	TOR1B	8.33e-05	0.102	171	0.205942
ENSP00000259365	TMOD1	1.68e-05	0.62	171	0.160287
ENSP00000259392	SLC31A2	5.25e-05	0.198	325	0.133972
[truncated: 11,102 more rows]
